# Supplementary material for: Identification and validation of genetic signature associated with aging in chronic obstructive pulmonary disease
Source: Aging (Albany NY). 2022 Oct 28;14(20):8568–80. doi: 10.18632/aging.204358 (PMC9648797; doi:10.18632/aging.204358)
Supplement: Supplementary File 1 [file aging-14-204358-s001.xlsx]

## Sheet: Sample
Supplementary File 1. Sample, the baseline characteristics of included human samples. gene Matrix, Integrated gene expression between GSE47460 and GSE76925. DEGs of COPD, different expressed genes of aged and young COPD patients.
Sample	Group	Sex	Age	Smoking history	Age_Group
GSM1150305	COPD	Female	84	Yes	Aged
GSM1150294	COPD	Female	82	Yes	Aged
GSM1150243	COPD	Male	81	Yes	Aged
GSM1150285	COPD	Female	80	Yes	Aged
GSM1150462	COPD	Male	80	Yes	Aged
GSM1150523	COPD	Male	79	Yes	Aged
GSM1150212	COPD	Male	78	Yes	Aged
GSM1150234	COPD	Male	78	No	Aged
GSM1150284	COPD	Female	78	Yes	Aged
GSM1150303	COPD	Male	78	Yes	Aged
GSM1150311	COPD	Female	78	Yes	Aged
GSM1150331	COPD	Female	78	Yes	Aged
GSM1150358	COPD	Female	78	Yes	Aged
GSM1150479	COPD	Female	78	Yes	Aged
GSM1150188	COPD	Male	77	Yes	Aged
GSM1150193	COPD	Female	77	Yes	Aged
GSM1150251	COPD	Male	77	Yes	Aged
GSM1150278	COPD	Male	77	Yes	Aged
GSM1150290	COPD	Male	76	Yes	Aged
GSM1150298	COPD	Male	76	Yes	Aged
GSM1150309	COPD	Male	76	Yes	Aged
GSM1150464	COPD	Female	76	Yes	Aged
GSM1150200	COPD	Female	75	Yes	Aged
GSM1150235	COPD	Male	75	Yes	Aged
GSM1150220	COPD	Male	74	No	Aged
GSM1150228	COPD	Male	74	Yes	Aged
GSM1150274	COPD	Male	74	Yes	Aged
GSM1150276	COPD	Male	74	Yes	Aged
GSM1150166	COPD	Male	73	No	Aged
GSM1150192	COPD	Female	73	Yes	Aged
GSM1150224	COPD	Male	73	Yes	Aged
GSM1150236	COPD	Male	73	Yes	Aged
GSM1150275	COPD	Male	73	Yes	Aged
GSM1150293	COPD	Male	73	Yes	Aged
GSM1150304	COPD	Male	73	Yes	Aged
GSM1150315	COPD	Female	73	Yes	Aged
GSM1150520	COPD	Female	73	Yes	Aged
GSM1150246	COPD	Female	72	Yes	Aged
GSM1150258	COPD	Male	72	Yes	Aged
GSM1150261	COPD	Male	72	Yes	Aged
GSM1150279	COPD	Female	72	Yes	Aged
GSM1150308	COPD	Male	72	Yes	Aged
GSM1150450	COPD	Male	72	Yes	Aged
GSM1150182	COPD	Female	71	Yes	Aged
GSM1150190	COPD	Male	71	Yes	Aged
GSM1150213	COPD	Female	71	Yes	Aged
GSM1150238	COPD	Male	71	Yes	Aged
GSM1150283	COPD	Male	71	Yes	Aged
GSM1150393	COPD	Female	71	Yes	Aged
GSM1150430	COPD	Male	71	Yes	Aged
GSM1150263	COPD	Female	70	Yes	Aged
GSM1150268	COPD	Female	70	Yes	Aged
GSM1150369	COPD	Male	70	Yes	Aged
GSM1150406	COPD	Female	70	Yes	Aged
GSM1150388	COPD	Female	49	Yes	Young
GSM1150162	COPD	Female	48	Yes	Young
GSM1150214	COPD	Male	48	Yes	Young
GSM1150296	COPD	Female	48	Yes	Young
GSM1150492	COPD	Female	48	Yes	Young
GSM1150338	COPD	Male	46	Yes	Young
GSM1150502	COPD	Male	46	Yes	Young
GSM1150389	COPD	Male	45	Yes	Young
GSM1150465	COPD	Male	28	Yes	Young
GSM2040924	COPD	Female	86	Yes	Aged
GSM2040919	COPD	Female	84	Yes	Aged
GSM2040942	COPD	Female	82	Yes	Aged
GSM2040920	COPD	Female	76	Yes	Aged
GSM2040940	COPD	Female	75	Yes	Aged
GSM2040805	COPD	Male	74	Yes	Aged
GSM2040869	COPD	Female	74	Yes	Aged
GSM2040840	COPD	Male	73	Yes	Aged
GSM2040931	COPD	Female	72	Yes	Aged
GSM2040938	COPD	Female	72	Yes	Aged
GSM2040863	COPD	Male	71	Yes	Aged
GSM2040848	COPD	Female	70	Yes	Aged
GSM2040827	COPD	Female	48	Yes	Young
GSM2040868	COPD	Male	44	Yes	Young

## Sheet: gene Matrix
geneNames	GSM1150465	GSM1150389	GSM1150338	GSM1150502	GSM1150162	GSM1150214	GSM1150296	GSM1150492	GSM1150388	GSM1150182	GSM1150190	GSM1150213	GSM1150238	GSM1150283	GSM1150393	GSM1150430	GSM1150246	GSM1150258	GSM1150261	GSM1150279	GSM1150308	GSM1150450	GSM1150166	GSM1150192	GSM1150224	GSM1150236	GSM1150275	GSM1150293	GSM1150304	GSM1150315	GSM1150520	GSM1150220	GSM1150228	GSM1150274	GSM1150276	GSM1150200	GSM1150235	GSM1150290	GSM1150298	GSM1150309	GSM1150464	GSM1150188	GSM1150193	GSM1150251	GSM1150278	GSM1150212	GSM1150234	GSM1150284	GSM1150303
ZZZ3	8.57669	8.85624	8.73587	8.79127	8.49303	8.68865	8.59968	9.03988	8.85564	8.55133	8.85249	8.4306	8.72747	8.88548	8.53951	8.51164	8.98543	8.84606	8.48387	9.01844	8.57378	8.92787	8.8122	8.40055	8.49381	8.65893	8.63808	8.47543	8.4393	8.66883	8.52441	8.88903	8.28814	8.33461	8.84737	8.87804	8.78233	9.12574	9.19739	8.58323	8.4775	8.74862	8.14819	8.41032	8.51594	8.62752	8.80963	8.40841	8.30137
ZZEF1	10.348	10.7221	10.6214	10.6487	10.505	10.2199	10.505	10.1899	10.652	10.4489	10.6805	10.5682	10.8734	10.5664	10.6322	10.2353	10.5647	10.5966	10.6942	10.3863	10.4642	10.3154	10.4258	10.524	10.446	10.7142	10.7161	10.5388	10.6006	10.7292	10.666	10.5596	10.4323	10.5786	10.5412	10.6223	10.6275	10.6499	10.5076	10.7366	10.5277	10.639	10.8024	10.4594	10.5995	10.7166	10.7333	10.4469	10.731
ZYX	11.2773	11.4461	11.4098	11.4613	11.8039	11.6158	11.4918	11.8774	11.7474	12.1064	12.1002	11.7773	11.3304	11.9211	11.7313	11.9474	11.8229	11.9641	11.4629	11.7488	12.1294	10.824	11.5798	11.8592	11.5915	12.2371	11.8445	11.5545	11.694	12.249	11.7119	10.666	11.6838	11.5881	11.9296	11.8844	11.7356	12.0356	11.2724	12.0071	11.7178	10.9712	12.0976	11.4438	11.9258	11.9068	11.7488	12.0012	11.9589
ZYG11B	9.23419	10.0611	10.1355	10.0771	9.82263	10.1211	9.90649	9.75077	9.69562	9.85702	10.4854	10.0229	10.1349	10.3189	9.89434	9.4082	9.91565	10.0229	9.89434	9.97065	9.9017	9.52048	9.92112	9.67632	9.60702	10.0931	10.0848	9.94896	9.78816	10.1709	9.71363	9.99584	9.73135	9.80245	9.69355	10.0156	9.92057	9.576	10.028	9.84848	9.70989	10.2543	9.74632	9.34801	9.95493	9.6495	10.1419	9.67664	10.1845
ZXDC	8.38697	8.27497	8.07546	8.3794	8.59664	7.5745	8.12525	8.13622	8.13766	8.23441	8.34787	8.21564	8.03446	7.91951	8.35104	8.10026	7.88118	7.85881	7.76035	8.05375	8.28439	7.65717	7.85238	7.77727	7.97553	8.22862	8.19338	7.85481	7.97035	8.19716	8.49541	8.07602	8.15051	7.86473	8.23829	8.44177	8.20143	8.03231	8.26228	8.36581	8.43829	7.82957	7.92955	7.83148	8.18211	8.38039	8.50149	8.02275	8.06995
ZXDA	4.96944	4.68989	4.51336	3.65012	5.05611	3.64507	3.80457	5.01612	4.2607	3.68812	5.17123	4.76718	4.6841	4.4071	4.75579	5.96538	4.79369	4.60587	2.97703	4.51497	5.08689	2.20368	4.67286	4.40493	3.81479	4.52323	3.42424	4.55417	4.44949	4.92403	4.76718	5.64473	3.65623	4.76363	3.99929	4.66074	4.94459	5.26786	4.49037	5.23453	4.77733	4.8446	4.94342	4.44418	4.33663	4.84153	4.81672	3.93374	4.94342
ZWINT	5.16901	5.9004	6.28186	6.55144	6.05369	6.94857	7.28151	5.10839	5.87769	5.80096	6.57234	5.10839	6.32991	6.22318	5.66311	5.96225	4.84025	6.60703	6.09407	7.13042	5.55905	7.52124	7.07237	6.14303	6.17999	5.84545	5.43311	6.25371	5.85629	5.63568	5.77595	5.05481	4.6989	6.21455	6.48949	6.12758	5.19385	7.44228	6.71069	5.47067	5.48354	6.3193	6.21341	6.51797	5.9004	5.36452	6.3124	5.82416	5.53468
ZW10	8.96385	8.9532	9.1558	9.22151	9.25214	9.13679	9.1258	9.71015	9.14235	9.07945	9.43969	8.88937	9.09325	9.28358	9.30726	8.98466	9.02664	9.12367	9.05205	9.47046	8.93153	9.08579	9.37991	9.09737	8.8723	9.09325	9.0272	8.83089	8.91222	9.03962	9.01548	8.99935	9.03536	9.02885	9.229	9.08382	9.12086	9.24603	9.42771	8.9285	8.86004	9.17931	8.96215	8.84062	9.03962	8.99298	9.15753	8.94497	8.77165
ZUFSP	8.44317	9.0276	8.49994	8.8243	8.81636	8.79377	8.62228	9.23923	8.76871	8.80209	8.73056	8.69979	8.79258	8.80843	8.99854	9.0276	8.71487	8.93421	8.61334	8.57397	8.66283	9.24727	8.93628	9.05784	8.62772	8.27731	8.68279	9.21154	8.50252	8.64992	8.78034	8.82783	9.58883	9.05905	8.91928	8.86588	8.77378	8.88305	8.90707	8.59134	8.44506	8.86211	7.49097	8.8536	8.64757	8.75012	8.51934	8.70358	8.18544
ZSWIM6	10.0765	10.027	9.7272	10.0612	10.651	10.303	9.71981	10.6655	10.1305	10.3094	9.69446	10.4273	9.70818	10.2666	10.1381	11.0585	9.76906	10.5248	10.145	9.84189	9.9696	10.2233	10.0124	10.6032	9.49496	9.53892	9.96912	10.0672	9.74709	10.0751	9.91584	9.6511	11.1236	10.6438	9.91959	10.0676	9.93265	9.66673	10.319	10.2569	9.83836	10.0305	8.82842	10.551	10.3467	10.0323	9.91903	9.87675	10.1952
ZSWIM5	6.96278	7.66582	7.20825	6.74912	6.69012	6.99286	7.2398	6.79233	7.29066	7.32205	7.03926	7.20079	7.07684	7.21307	7.06806	6.51825	7.14919	7.39565	7.5599	7.14451	7.81554	6.84575	7.24356	6.72332	7.16125	7.76661	7.43378	7.17806	7.19042	7.73879	6.98257	6.71143	6.57259	6.75619	7.83213	7.69025	7.52785	6.87532	7.29809	7.6006	7.83242	6.85429	7.71114	6.34357	7.37658	6.94757	7.40256	7.24436	7.65523
ZSWIM3	7.04544	7.06972	7.24788	6.95545	6.7847	6.72694	7.08148	6.78031	6.92333	6.82384	7.24601	6.65628	6.75851	6.84678	6.97503	6.10909	7.03984	7.15378	7.11398	7.0546	7.30466	6.79219	7.22911	6.60382	7.02746	7.2921	7.31055	6.87517	7.17599	7.09304	6.95441	6.62571	6.71857	6.86437	7.57331	6.69888	7.16508	7.44048	6.97238	6.98836	6.98122	6.95915	7.56786	6.35638	7.20082	6.80542	7.09918	6.68536	7.0675
ZSWIM1	7.04929	6.51129	7.00956	6.5605	7.29376	7.35868	7.50829	7.36137	7.29376	7.19704	7.3524	7.66305	6.87332	7.43702	7.48861	6.97906	7.16593	6.7623	7.45498	7.37381	7.3315	6.54574	7.19863	7.39843	6.5267	7.7081	7.13953	7.48036	7.30191	6.90564	6.95169	6.6508	7.40485	6.59272	7.52798	6.82637	7.27252	7.29028	7.18192	7.66305	7.06916	7.10878	7.4147	6.17714	6.92947	6.41071	7.32434	6.88855	8.05978
ZSCAN5A	7.95851	7.21242	7.11961	7.09411	7.54606	7.28006	6.98326	7.51785	7.29666	7.5424	7.22196	6.99502	7.71825	7.27658	7.57065	7.43839	7.20917	7.21062	7.13591	7.20287	6.71599	7.81467	7.12988	7.47734	7.30599	7.12685	7.16898	6.97186	7.03745	7.08242	7.42839	6.86923	7.50512	7.07473	7.33206	7.59528	6.8776	7.5481	7.31163	6.99857	7.5978	7.44416	7.56637	7.79158	7.26337	6.98404	7.42766	7.27791	6.85443
ZSCAN4	4.68735	4.9768	2.51722	4.60026	2.73457	3.33037	2.9129	3.05301	3.84621	3.34587	2.68675	3.28775	3.09952	4.19411	2.68295	3.3962	4.41771	4.26916	3.28775	5.23081	3.3962	3.07445	4.00626	3.27633	3.77379	3.20271	4.21788	2.76356	2.8498	3.27633	3.33304	3.50507	2.7958	3.80507	3.23551	2.87888	3.36618	3.35768	2.84705	3.9937	3.79345	3.02719	3.53079	4.37151	4.40199	2.7836	3.00227	3.65409	3.74229
ZSCAN29	6.07199	6.4571	6.71261	6.45458	6.50036	6.25679	6.93957	6.22983	6.5647	6.37084	6.61799	6.35611	6.52422	6.52595	6.37507	5.64616	6.49977	6.81937	6.60085	6.6804	6.48305	5.47382	6.63758	6.18094	6.25901	6.54681	6.64255	6.37967	6.36759	6.74098	6.50717	6.6339	6.47576	6.33549	7.07595	6.33188	6.58537	6.53541	6.77969	6.58753	6.5085	6.29187	5.95726	6.21182	6.58359	6.51347	6.80474	6.22847	6.43178
ZSCAN22	4.34492	4.06076	4.6152	4.39444	4.9793	4.66302	4.56015	4.85965	4.50227	4.5331	4.50932	4.54157	4.25537	4.39584	4.65415	4.44832	4.53372	4.35808	4.64098	4.34265	4.97339	4.26362	4.41983	4.56596	4.16398	4.59596	4.40552	4.63962	4.50411	4.59859	4.55886	4.59859	4.52967	5.32551	4.78674	4.03023	4.47634	6.00752	4.93052	5.25164	4.59596	4.14602	5.30112	4.31392	5.3221	4.08854	5.07168	4.29047	4.97201
ZSCAN21	7.76513	7.80724	7.54811	7.61897	7.3892	7.38842	7.23475	7.57325	7.61326	7.40702	7.6963	7.5436	6.83531	7.50921	7.71486	7.07133	7.35937	7.48271	7.53493	7.60863	7.60743	7.15772	7.69919	7.31375	7.43984	7.43709	7.51963	7.52463	7.29847	7.67377	7.32738	7.81911	7.60269	7.54058	8.04386	7.35491	7.62534	7.52662	7.80203	7.71903	7.75187	7.68526	7.61033	6.90884	7.57251	7.42632	7.4721	7.54733	7.50181
ZSCAN18	12.3938	11.6626	11.7106	11.7134	11.6597	11.2681	11.278	11.5314	11.6426	11.7942	11.3667	11.7656	11.3463	11.2437	11.9329	11.4838	11.8452	11.7683	11.788	11.5189	11.8773	10.9232	11.4195	11.0498	11.8833	11.805	11.7514	11.4795	11.6584	11.7373	11.9109	11.9522	12.366	12.2287	11.9396	11.634	11.7977	11.2577	10.8779	11.7192	11.8347	11.2093	11.2705	11.8525	12.1351	11.8557	11.404	11.63	11.8155
ZSCAN16	7.09393	7.25148	7.3634	7.06682	7.33014	7.02697	7.5313	6.56253	7.10701	6.84207	7.57353	7.35937	7.11997	7.38465	7.11607	6.16135	7.35178	7.26754	7.60027	7.38726	7.41153	7.00885	7.19451	7.01127	7.24545	6.87583	7.2505	7.56518	7.34759	7.12268	7.20659	7.13614	7.35005	7.32144	8.03962	7.11047	7.48922	7.60291	7.60782	7.48922	7.4705	7.57944	7.90727	7.12224	7.16895	7.62168	7.52267	7.18465	6.59576
ZSCAN12	5.10635	4.56826	4.81693	5.03308	5.10493	4.72605	4.9834	4.69524	5.48239	4.60373	5.48239	5.30062	4.62433	4.98159	5.44456	4.13796	5.68816	5.20775	4.90705	5.13821	5.68483	3.75796	5.00776	4.58191	4.59581	5.09541	4.68826	5.03661	5.1428	5.51017	5.08523	4.75115	5.44885	4.76289	5.46891	5.50066	5.41793	4.99553	5.67837	5.76875	5.30542	5.20651	4.1815	3.46038	5.03308	4.27463	5.19531	4.48292	4.90374
ZRSR2	9.0142	8.64951	8.81352	8.79786	8.55618	8.68185	9.32494	8.66268	9.16361	8.92488	8.49185	8.78726	8.71152	8.62161	8.87811	8.24634	8.98795	8.52944	8.74364	9.24856	8.96838	7.97129	8.71564	8.56963	8.51226	8.58958	8.99368	8.46659	8.19686	9.09914	9.20427	8.68604	8.38446	9.04528	8.96267	8.85284	8.80898	8.91989	8.77286	8.61633	9.16118	8.50265	8.50235	8.09289	8.80203	8.68137	8.65986	9.00834	8.46771
ZRANB3	3.53906	3.76363	3.57867	3.82999	3.57017	3.74589	3.8452	4.04569	4.01724	4.39958	3.51682	4.48854	4.22262	3.4493	3.81272	4.24943	2.22769	3.53707	4.7334	3.76453	4.13636	3.03619	4.04735	3.52161	3.81651	4.61916	4.85526	3.00927	3.74219	4.29162	3.91958	4.3946	2.99356	4.18631	4.06297	4.1656	3.98687	3.09706	3.79591	4.28562	3.91576	3.90587	3.64999	3.04432	3.84699	4.11587	3.60654	5.17915	3.62013
ZRANB2	11.8771	11.668	12.242	12.0262	11.6535	11.8058	11.8675	11.8892	11.9785	11.8935	10.8849	11.4362	11.2489	11.7017	11.7712	11.128	11.7162	11.685	11.6732	11.8047	11.8975	11.8695	11.6429	11.4695	11.949	11.5258	11.901	11.5913	11.4446	11.797	12.1066	11.6979	11.5228	11.9255	11.8213	11.949	11.8475	11.6185	12.061	11.6384	11.6742	11.3755	10.0938	11.2698	12.0375	11.2852	11.8569	11.5429	11.4826
ZPBP2	2.54591	2.22606	2.21325	2.7943	2.26976	4.59508	2.23651	2.19708	2.24147	3.15599	2.20662	2.28621	3.47622	2.22606	3.03685	2.23651	2.20662	2.24668	2.17967	2.12733	2.34554	2.20662	2.32127	2.28621	2.23085	2.47355	3.71604	3.1461	2.19708	2.15676	2.29942	2.24668	2.09703	3.52088	3.33362	2.35492	2.64169	4.14423	2.17967	2.23085	2.27433	2.25063	2.18931	2.14223	2.68989	2.16758	2.33879	2.04614	2.30189
ZP3	4.85389	6.44281	6.31852	6.31852	7.70434	5.91731	5.47048	6.77657	6.80234	5.41045	6.55144	6.41013	8.00812	6.39967	5.61542	6.59165	6.59691	6.24539	5.7195	7.9085	7.05198	6.88133	6.27535	7.62768	6.57438	6.56655	7.20649	7.26869	7.68697	6.89467	6.32612	7.86175	5.91731	6.40455	6.38296	7.66276	5.91731	7.84879	7.89518	7.90567	7.56025	7.13101	8.86799	7.17445	6.56958	6.3871	6.75173	5.7143	5.93999
ZP2	2.04413	3.3336	2.67674	3.08842	2.68196	3.21695	3.3336	2.5014	3.69699	3.39681	3.90135	2.05427	2.02633	3.24777	2.31471	3.65021	2.05097	3.07235	3.27018	2.95824	4.09089	2.95124	2.53293	2.07097	3.14697	2.55454	4.72037	4.14127	3.65249	2.82612	2.07812	2.16861	2.85752	2.05427	2.06639	2.00241	2.11472	2.78628	2.04131	3.35607	2.78418	2.20445	2.50966	3.00063	2.36661	4.90291	2.07569	3.22839	2.58503
ZNRF3	8.9066	9.22137	9.06169	8.82474	9.22832	9.30897	9.7609	9.20104	9.54475	9.0165	8.50059	9.07907	8.37205	8.65696	9.45146	8.56609	8.74228	8.35816	9.6295	9.38637	9.20367	8.54671	8.2288	8.19679	8.26019	9.43588	9.17027	8.97536	8.97284	9.0196	8.97954	8.12444	8.11324	8.61445	9.42834	8.70863	8.93283	8.14735	8.43854	9.51575	9.05507	8.26376	9.22247	8.41017	8.96603	8.14122	9.09448	8.34917	9.27019
ZNRF1	6.1021	6.14256	6.11422	6.14927	5.67703	5.55738	6.0185	6.19748	6.28383	5.99851	5.79582	6.33623	5.69058	6.26877	6.27898	6.25823	6.5015	6.69241	6.46097	6.19979	6.63979	5.74218	6.1766	6.00011	5.98808	6.51849	6.50904	6.32241	6.26587	6.87675	6.19913	5.8069	6.61724	5.77902	6.81884	5.8657	6.26587	5.94859	5.562	6.47228	6.67878	5.82142	6.2405	5.55634	6.09344	6.19485	6.46656	6.27231	6.48917
ZNRD1	9.78834	10.0206	9.84689	9.95728	10.1251	9.83668	10.0889	10.371	9.96729	9.85297	9.92872	9.84332	10.0562	9.82309	9.83346	9.79549	10.4973	9.85891	9.95184	10.327	9.8548	10.148	9.96822	10.1601	10.0111	9.75511	9.86307	9.88943	10.3285	9.76729	9.93605	10.1731	10.3052	9.91802	10.0201	9.9577	10.098	10.2842	10.194	9.85225	9.98102	10.2746	10.1223	9.89835	9.6671	10.0068	10.0502	10.278	9.79397
ZNHIT6	8.80198	9.20128	9.00921	8.9669	9.12665	9.53862	9.01886	9.71539	9.06132	9.15893	8.59701	9.17572	9.04782	9.1262	9.12665	8.5931	9.23615	9.01135	9.11792	9.42067	8.91155	8.89119	9.1579	9.60653	9.20441	8.35795	8.84747	9.40258	9.22847	9.23528	9.1095	9.76187	9.47086	8.68119	9.24451	8.94142	9.18537	8.80019	8.80882	9.09541	8.97388	9.05466	8.08083	9.04292	9.11911	9.01026	9.01341	9.06472	8.93434
ZNHIT3	11.7768	11.6677	11.822	11.4799	11.3255	11.4042	11.8018	11.1624	11.691	11.5501	11.4788	11.4512	11.2659	11.6786	11.4987	11.0068	11.8119	11.5477	11.6829	11.4258	11.5171	11.7934	11.6356	11.2954	11.6189	11.4138	11.582	11.6665	11.7411	11.3264	11.6269	11.6531	11.1486	11.3357	11.7309	11.5086	11.5339	11.795	11.877	11.4852	11.6367	11.8153	11.7442	11.1154	11.4632	11.4524	11.7089	11.6269	11.4614
ZNHIT1	11.5769	11.905	11.8066	11.8406	11.3576	11.7734	11.6447	11.3838	11.7526	11.4259	11.5497	11.6596	11.8368	11.626	11.5522	11.3106	12.0725	11.4778	11.744	11.8154	11.5742	11.7926	11.8473	11.5522	11.7306	11.9675	11.4778	11.9408	11.914	11.6402	11.6803	11.6736	11.401	11.4024	11.744	11.6857	11.5693	11.5915	11.6991	11.7285	11.5586	11.711	12.0014	11.5267	11.5693	11.512	11.9466	11.7489	11.8294
ZNFX1	9.61214	9.15938	9.44033	9.62244	9.66694	9.14169	9.90778	10.723	9.3824	9.79452	10.1709	9.92176	9.35588	9.77196	9.56131	10.9005	9.55915	10.0513	9.57207	9.68619	9.93624	9.12321	9.96189	9.97667	9.55504	9.85557	9.86798	9.57978	9.43185	9.94067	9.5323	9.93549	10.289	9.82525	9.92111	9.49397	9.85092	10.2109	9.63153	9.80187	9.82686	9.64488	10.1068	9.77223	9.72693	9.82216	10.0917	9.78959	9.77812
ZNF92	6.0133	6.1117	6.14674	5.91357	5.62608	6.40312	6.4101	5.4403	5.619	5.98565	5.91586	5.91536	5.48714	5.9674	5.8806	5.56101	6.44758	6.44312	6.5836	6.52451	5.93719	6.228	6.37879	6.00602	6.90439	5.70243	6.04884	6.24274	5.89161	5.96439	6.28588	6.29667	6.29192	5.75066	6.24687	6.03694	6.10667	6.03761	6.31385	6.01622	5.68799	6.30434	5.37008	5.98621	6.25048	5.73868	5.73398	5.96687	4.92072
ZNF85	5.18255	6.43458	6.42468	6.65855	6.02601	5.99732	6.87753	5.7187	5.87518	6.35835	6.36536	6.65203	5.87185	6.7801	6.10243	5.76726	6.37801	6.95198	6.80008	6.42531	5.93803	5.40336	6.30567	6.32904	6.45294	5.84866	6.30308	7.18629	6.13859	6.56399	6.6037	6.69836	6.72395	6.62488	6.62342	7.02436	6.69961	5.84162	6.35835	6.59824	5.57609	6.7474	5.06717	6.17547	6.70831	6.39035	5.96533	6.65855	5.5103
ZNF845	8.00189	8.26694	8.06217	7.92262	8.05362	7.96391	8.19786	8.11698	8.35559	8.05362	8.09606	8.55648	7.83477	8.26401	8.19732	7.71569	8.35616	8.058	8.48298	8.11663	7.92381	8.50644	8.1283	8.41155	8.02638	7.94201	7.84894	8.51131	8.00877	7.77438	8.27543	8.45476	8.6087	7.82781	8.17899	7.98311	8.29272	7.98825	8.14652	8.14652	7.60982	8.46702	7.7303	7.28316	7.59535	8.28265	8.30056	8.24703	7.34428
ZNF841	6.60932	6.80478	6.61932	6.82954	6.79574	6.84141	6.79221	7.35915	6.96738	6.52382	7.08811	6.90277	6.60518	6.88013	6.76608	6.26494	6.9053	6.66947	6.93297	7.08384	6.93047	6.65093	6.80556	6.74977	6.63408	6.64683	6.75268	6.58716	6.51893	7.05676	6.67467	6.92703	6.95637	6.71627	6.66318	6.83002	6.76567	6.88936	6.97967	6.60181	6.7084	6.67248	6.1285	6.09898	6.85828	6.44849	7.05219	6.89015	6.79497
ZNF84	8.7653	9.15566	8.8462	9.17938	8.75052	8.63112	8.59165	9.09946	9.12875	8.65794	8.16385	8.56452	8.67624	8.37841	8.869	8.79947	8.70314	8.73735	8.33718	8.8184	8.73979	8.75785	8.72834	8.28166	8.80847	7.96303	8.54247	8.40382	8.38132	8.37014	8.93585	9.42206	8.73791	8.47284	9.41381	8.7533	8.77905	8.81352	8.95409	8.39302	8.66144	8.8713	7.43934	8.63253	9.03156	8.94183	8.49208	8.5306	7.82625
ZNF839	8.13152	8.09616	8.52058	8.31081	7.84893	7.82108	8.2332	7.45176	8.33952	7.99973	8.34593	8.18691	8.28263	8.17034	8.0445	7.44875	8.11382	8.03839	8.35419	8.42384	8.39961	8.006	8.04368	7.78812	8.44546	8.34331	8.22596	8.24366	8.41328	8.16397	8.32207	8.29579	7.75313	7.86934	8.15586	8.45558	8.17923	8.41012	8.37255	8.23136	8.39892	8.13426	8.39203	8.01952	8.18003	8.31839	8.42183	8.31376	8.16043
ZNF831	6.64735	7.68429	6.86774	6.53643	8.13722	4.77494	7.65244	6.72607	7.0302	7.32304	6.77698	7.40632	6.69462	6.62941	6.70691	7.92427	7.53618	7.37105	7.14708	7.03833	6.93132	6.59963	8.05569	7.21361	7.56727	6.80725	7.6567	6.75653	7.11622	7.35315	7.86853	7.31861	6.64735	7.36793	7.75042	6.26842	8.1681	8.69741	8.2636	6.44218	7.79708	7.57853	7.54046	8.5869	7.24192	7.73266	7.86309	7.77997	6.78288
ZNF830	8.33642	7.85999	7.81311	8.0748	8.38292	7.57844	7.90856	8.36982	8.00412	8.2084	7.6495	8.10508	7.82267	7.87341	8.04892	8.37569	8.16271	7.98797	8.18488	7.4521	7.97505	7.76911	7.90911	8.07765	7.77022	8.2084	8.13653	8.0188	7.84544	7.93393	7.62799	8.05695	8.49892	8.17324	8.2761	7.63994	8.09261	8.07209	8.15807	7.9	8.23379	8.27503	7.48044	7.87045	8.05431	7.82448	7.93545	7.8276	7.82267
ZNF829	2.50453	2.71737	2.7325	2.46447	3.22248	2.50412	3.63773	2.44878	2.49552	2.55665	2.45194	2.54678	2.47296	3.08246	2.51287	2.51287	4.15722	2.47924	2.43914	2.44878	2.62283	2.46939	2.45119	2.55088	2.48484	2.48678	2.60069	3.3533	2.48066	2.39103	2.55539	2.52721	2.42504	2.4401	2.50578	3.37311	2.48771	2.52721	2.43109	2.51003	2.52931	2.52381	3.34523	2.40216	2.45947	3.63536	2.4844	2.43188	2.52544
ZNF827	7.35935	6.77718	6.39971	6.39224	6.37857	7.67482	6.95413	6.81248	6.80056	5.98569	7.44648	7.41512	7.19733	6.77961	6.92347	6.98157	6.82931	6.91762	5.48456	7.28369	7.92369	6.97197	7.05439	6.52334	6.88784	7.57637	6.84093	4.29832	6.98283	7.36476	7.42524	7.11372	6.19823	6.80954	6.63583	7.36476	6.89372	7.45017	6.65479	6.91762	7.46682	6.89064	7.4691	6.71391	7.27009	6.851	7.17587	5.87547	7.8283
ZNF823	7.45903	7.3787	7.35616	7.72895	6.89997	6.84214	7.50129	6.77034	7.64052	7.06532	7.87345	7.40817	6.61775	7.8942	7.56377	6.2734	7.56446	7.74907	7.75451	7.31428	7.81785	6.89479	7.42071	7.23544	7.19997	7.56598	8.11159	7.75888	7.3189	7.39249	7.72235	7.33554	7.17635	7.69588	7.86874	7.34716	7.72235	7.6214	7.40217	7.72524	7.56598	7.86792	6.45086	6.19793	7.27215	7.00265	7.63566	7.59611	7.14757
ZNF821	7.2741	7.29089	7.47957	7.22901	6.96953	7.39146	7.26424	6.32851	7.55831	7.11025	7.60875	7.33725	7.29988	7.33256	7.31578	7.25133	7.6681	7.58678	7.72382	7.66356	7.9102	7.18519	7.28108	6.80606	7.71246	7.73848	7.5988	7.46447	7.56808	7.63014	7.62344	7.37614	6.87062	7.26574	7.4364	7.34932	7.40322	7.46053	7.5813	7.29988	7.47015	7.58611	8.08065	6.51072	7.45353	7.32585	7.61692	7.26067	7.81593
ZNF813	6.60828	6.8716	7.24342	7.1366	6.78211	6.75674	7.21895	6.92251	6.7681	6.71713	7.22321	6.98224	6.58663	7.26825	7.1089	6.18155	7.01409	7.42511	6.87044	7.66914	7.13821	6.26933	7.2111	6.88748	6.94363	7.08187	7.3692	6.90468	6.88502	7.16235	7.17601	6.94024	6.91626	7.23292	7.16289	7.03633	7.33315	7.22321	7.26311	7.18038	6.65591	7.28183	6.40108	6.82217	7.08599	6.93853	6.93799	7.17258	6.43442
ZNF804A	3.04531	3.28695	3.19597	3.01527	2.78231	3.05263	3.04531	3.03713	3.08883	3.11116	3.88487	3.13962	3.0801	3.08658	3.03143	3.09465	3.04986	3.02019	3.82123	2.95156	3.2601	2.99158	2.78936	3.17061	2.97243	2.99676	3.626	2.92142	4.43654	3.02851	3.10884	3.13508	2.97354	2.99676	3.13962	3.04986	3.03846	3.02361	2.99822	3.12589	3.01233	3.07866	3.73196	3.00531	3.64677	2.96472	4.42747	3.78585	3.10053
ZNF80	3.16752	4.15948	4.10178	4.23071	4.70834	2.46057	3.79571	3.04347	3.39052	5.06915	3.88199	3.95599	4.6355	2.43986	4.12721	4.352	4.52433	3.50941	4.21931	3.89997	2.90776	2.39451	3.85032	5.02161	4.62919	2.38527	1.89379	5.04326	3.95599	3.77732	4.34396	5.03839	2.82741	4.97542	3.28355	4.04855	3.13923	4.53531	4.70157	4.64465	3.16752	5.13308	3.4579	5.2507	3.10355	4.92911	3.72668	2.79624	2.96499
ZNF8	5.66224	5.78716	5.65196	5.80908	6.00859	6.09408	5.68376	6.34178	5.94883	5.74227	5.86563	5.72467	5.94136	5.77183	5.94731	5.57725	5.90722	5.79119	5.67763	5.7704	5.72801	6.15094	5.74536	6.30176	5.65541	5.82115	5.66294	5.79551	5.87264	5.57499	5.55326	5.73586	6.22709	5.64115	6.02109	5.35783	5.86415	5.98854	5.68237	5.67061	5.61037	5.74776	5.88214	5.9465	5.78085	5.68674	5.7144	5.79185	5.93824
ZNF799	5.09227	5.30355	5.17975	4.99219	4.9605	4.94601	5.31385	4.88485	5.20872	5.20607	5.40413	5.16765	4.84484	5.0779	5.1929	4.51294	5.23358	5.45012	5.40924	4.93099	5.66669	4.09777	5.42071	4.93192	4.81815	5.07477	5.91175	5.23484	4.85328	5.63893	5.30278	5.16869	5.60636	5.0669	5.81288	5.33252	5.27788	5.03781	5.15289	5.18851	5.34254	5.29735	4.54107	4.3792	5.55502	5.31658	5.41993	4.60782	5.11279
ZNF792	7.72401	8.28558	7.72554	7.60312	6.99355	6.76037	7.70405	7.09592	7.74813	7.47416	7.87262	7.86268	6.77718	7.62164	7.93978	6.21263	7.74179	7.89721	7.72228	7.37772	7.87684	7.0619	8.08774	6.88653	7.39211	7.93162	7.99337	7.47583	7.62306	8.00069	8.07109	7.85637	7.23859	6.75637	8.2869	7.32201	7.90263	7.84017	7.38935	7.97043	7.69641	7.83149	8.25729	6.13474	7.69184	7.90599	7.8578	7.4734	7.72916
ZNF791	7.06962	7.67148	7.32913	7.45567	7.50589	7.70681	7.616	7.79096	7.49203	7.2025	8.01206	7.90848	6.97206	7.33415	7.29001	7.50993	6.61417	8.11505	5.98078	7.61957	8.18157	6.21489	7.44252	7.30046	7.02948	7.78389	7.40219	6.88903	6.55468	7.48067	8.12081	8.27465	6.69157	8.19116	7.98742	7.75368	7.89395	7.83862	7.47475	7.85588	7.94833	8.0682	7.1359	7.10912	7.17223	7.47428	7.66817	6.81474	8.03352
ZNF79	5.83827	6.13542	6.65593	6.13708	6.37392	6.36447	6.54921	6.77296	6.65087	6.18687	6.58977	6.15391	5.95537	6.22001	5.98327	5.89838	6.69557	6.42045	6.54601	6.20427	6.43301	5.72033	6.60538	6.27817	6.39943	6.39823	5.80475	6.57349	6.54186	6.49306	5.99523	6.36376	6.67911	5.81329	6.72663	6.16569	6.31986	7.02829	6.83466	6.27418	6.32487	6.37034	7.04443	5.92061	6.25271	6.44932	6.78136	6.08385	6.29019
ZNF787	8.93948	9.02268	8.83726	9.03742	9.50812	9.35546	9.15465	9.89837	9.29821	9.14845	8.97099	8.99266	9.24824	8.7707	8.89379	9.69765	9.31909	8.63536	9.05605	9.23945	9.18548	9.26252	8.75527	9.44988	8.85782	9.08915	9.04935	9.24211	9.1598	9.11906	8.88301	9.19266	9.46286	8.7383	9.45017	9.13371	8.84394	9.37597	9.2485	9.14765	8.89958	9.06436	9.5319	9.19706	8.9656	8.8112	9.10733	9.06378	9.21185
ZNF786	9.28797	9.1731	9.52466	9.57144	9.1755	8.707	9.52986	9.33595	9.69678	9.00174	9.58547	8.89433	9.13228	9.4912	9.59673	8.35569	9.09622	8.98924	9.44196	9.44646	9.32056	9.10986	9.55381	8.90887	9.08641	9.26336	9.53065	9.43149	9.55114	9.02893	9.28423	9.16504	9.18819	8.95344	9.83358	9.20852	9.30195	9.67154	9.4516	9.01107	9.55803	9.59015	9.37414	8.69728	9.46287	8.93613	9.26044	9.50058	9.49057
ZNF781	5.31934	5.7754	4.43328	5.31426	4.22421	4.24977	4.85408	4.46181	5.68537	5.50405	4.51753	5.39155	4.78844	5.23499	5.54968	4.70473	5.88273	5.21496	4.72509	4.42032	5.36568	4.25858	6.98778	3.58733	4.81152	4.21878	5.38623	5.28004	4.95401	5.91891	5.23862	6.0734	4.85138	4.23912	5.69333	4.87388	5.74693	4.56304	4.44491	5.32435	5.60215	5.60295	3.38153	2.89212	5.92821	5.41124	5.30536	5.03009	5.22572
ZNF778	4.44885	5.21764	4.77265	4.53755	5.3458	5.26877	4.68103	6.03336	5.17239	4.64344	5.08771	4.81194	4.97098	4.69446	4.53755	3.85594	4.40048	4.55494	5.16751	5.17803	5.0619	5.11427	4.70772	5.08034	4.51432	4.69155	4.50733	4.54672	4.91343	4.72975	4.70329	4.9442	5.53413	5.28458	5.15977	4.63899	4.72536	5.19878	5.57399	4.933	4.56057	4.81071	5.16439	4.84323	4.71997	4.24329	4.976	4.64344	4.91721
ZNF777	9.42059	9.25798	9.1614	8.95101	9.60542	9.47492	9.27195	9.85512	9.28939	9.2275	9.13463	9.43742	9.06359	9.17547	9.29003	8.52036	9.35227	9.22493	9.56181	9.54361	9.44197	9.51181	9.32809	9.51541	9.32263	9.52352	9.42217	9.52721	9.61686	9.27396	9.19643	9.24009	9.56397	9.07729	9.72542	9.19894	9.25191	9.60672	9.35352	9.44885	9.27525	9.18574	9.49536	9.32263	9.30955	8.96078	9.33579	9.63807	9.50269
ZNF773	7.46444	7.75976	8.01441	7.844	8.01917	7.85403	8.16741	8.40306	8.14998	7.74899	8.10455	7.20993	7.62013	7.88005	8.01303	7.08362	8.28842	8.02848	8.09209	8.37145	7.79769	7.06503	7.92685	7.74826	7.80247	8.47305	7.95678	7.66243	8.10102	7.95899	7.74899	7.81646	7.54755	7.17188	8.14029	8.00822	7.86186	7.91417	8.16222	8.1635	7.9865	7.73489	8.33364	6.95139	8.15221	7.76445	8.0571	7.6174	8.03337
ZNF770	6.6248	6.50184	5.95316	6.21643	7.11214	6.50896	6.29302	7.00161	6.72726	6.6093	6.19017	6.97903	6.72016	6.65214	6.25615	6.59728	6.88394	6.97254	5.19557	5.60118	6.87373	6.2253	6.50538	6.82347	6.60263	6.95518	6.00975	6.26978	6.94904	6.7	6.79406	6.97602	6.68926	5.97011	7.22665	6.37432	6.34544	7.21432	6.82483	6.69798	6.37432	6.38003	5.29256	6.88394	5.92545	6.34544	6.85349	6.23225	6.95049
ZNF77	7.30673	6.66393	6.14038	6.52813	6.63557	5.59121	6.82759	7.02075	6.2421	5.69589	7.44091	6.40516	6.00825	6.3234	6.59473	5.25996	5.69861	7.37695	6.38635	6.04383	7.2814	6.66297	6.45089	6.10915	5.83673	6.58179	6.48864	5.75505	5.89928	7.21874	6.21578	6.85094	6.54933	6.41097	7.04671	6.59007	6.68122	6.37216	6.42049	7.16536	6.83761	6.57126	6.16678	5.8323	6.38755	6.64599	6.3143	6.8064	6.60556
ZNF767	7.52164	7.02976	7.92471	7.36588	7.24169	7.27556	7.47178	7.43397	7.71559	7.20277	7.0112	7.43428	7.0032	7.36588	7.46492	6.52606	7.60583	7.33022	7.40832	7.59067	7.79437	7.07206	7.7225	6.72994	7.64967	7.76441	7.65551	7.50935	7.20211	7.88213	7.77975	7.16172	6.8363	7.18684	8.09444	7.4377	7.65501	7.7259	7.66284	7.5473	7.57601	6.98415	6.89791	7.035	7.6544	7.11908	7.91004	7.31216	7.59405
ZNF764	5.02174	4.16544	4.44123	4.61206	4.94094	4.54698	5.14164	5.0351	4.76929	4.49367	5.16639	5.10945	4.33171	4.87339	4.18344	4.31077	4.79805	4.70137	5.00914	4.35143	4.95797	3.5242	4.72893	5.00245	4.63011	5.0324	3.89104	4.49878	4.91325	4.3568	4.77645	4.84576	5.36723	4.81577	5.31499	4.53275	4.73601	5.37544	5.14732	4.91488	4.81325	4.87593	5.64032	4.48377	4.50039	4.52212	4.95797	4.15383	5.52583
ZNF761	6.3111	6.57085	6.83303	6.7426	6.80744	6.71015	6.35073	6.92171	5.25429	6.28735	6.6505	6.00563	6.53633	6.80528	6.49506	6.10261	6.75153	7.18191	6.39697	6.54711	6.18874	5.97073	6.5273	6.27439	5.70388	6.43552	6.69627	6.61403	6.08703	6.73848	6.44847	6.77304	6.41555	6.80238	5.49107	6.65889	6.89746	6.17173	6.58598	7.04142	5.98253	6.59638	5.04738	6.20361	6.70804	6.89456	6.51591	5.99615	5.87252
ZNF76	8.16248	7.86837	7.9193	8.08581	7.89922	7.58573	7.89196	7.8439	8.08967	7.92596	8.38996	8.07694	8.02739	7.95271	8.04636	8.08642	7.6209	8.0202	7.53015	7.85267	8.41734	7.9333	7.8198	7.93636	7.89642	8.2127	8.04467	7.92535	7.95568	8.16529	7.89479	8.19188	7.5592	7.99315	8.11909	8.13417	8.13608	8.17831	8.01867	7.98256	8.36044	8.00795	8.34476	7.92936	7.97332	7.9611	8.06508	7.94877	8.03932
ZNF75D	9.31343	9.31801	9.49762	9.70647	8.76645	8.72779	9.1433	8.54234	9.35206	9.16312	8.92293	8.98347	9.05055	9.09993	9.34886	8.53522	9.12137	9.31722	8.9281	9.1604	9.52035	8.85508	9.37102	8.48035	9.29829	8.75013	9.50988	8.95332	8.75907	9.42383	9.5854	9.34547	8.56127	9.16088	9.53898	9.30502	9.31447	9.2417	9.50827	9.21504	9.58942	9.20213	8.1806	8.49925	9.50536	9.30111	9.31077	8.83313	9.0218
ZNF747	5.5933	5.31665	5.05132	5.5714	5.81413	5.59128	5.39277	6.00094	5.32258	5.56214	5.6334	5.59627	5.25362	5.10462	5.59419	5.0831	5.31032	5.48522	5.66593	5.38431	5.63989	5.23291	5.45707	5.46709	5.20867	5.82585	5.68801	5.37273	5.43999	5.35085	5.05413	5.7001	5.5869	5.42512	5.74673	5.39098	5.3835	5.79308	5.39442	5.6295	5.73733	5.93861	5.82509	5.29828	5.33893	5.12869	5.53877	5.3119	5.72238
ZNF746	10.3395	10.3557	10.3141	10.4637	10.6122	10.2077	10.459	10.6183	10.4213	10.3299	10.4148	10.6991	10.3506	10.4849	10.5669	10.4178	10.3515	10.3099	10.4246	10.4288	10.4986	10.4812	10.4837	10.444	10.2801	10.4869	10.6838	10.3843	10.638	10.5271	10.3826	10.3395	10.5605	10.4429	10.7738	10.266	10.4081	10.6967	10.6039	10.7302	10.3475	10.4703	10.642	10.387	10.3774	10.5805	10.4516	10.4395	10.5169
ZNF738	9.87204	10.7964	11.1212	11.1062	10.8087	10.7908	11.6473	10.3203	10.3412	10.8764	10.6573	11.3519	10.4009	11.3291	10.8944	10.8313	11.0709	11.6301	11.4471	10.8463	10.607	10.4571	10.9786	11.0729	11.1906	10.1793	10.948	11.4709	10.8968	10.9035	11.2691	11.2509	11.411	10.943	11.3506	11.0976	11.4225	10.5143	10.6598	11.2838	10.2398	11.3049	9.52758	10.8203	11.0309	11.1819	10.6591	11.3362	10.1698
ZNF728	3.73714	4.22943	5.05332	3.34516	4.77879	5.01481	5.63761	4.50429	3.32863	5.0236	4.3651	5.73531	4.30515	5.51887	4.02791	3.8767	5.09759	5.64494	5.63232	4.40263	4.75509	4.11033	5.01841	5.50484	5.15932	3.94877	4.72844	5.3959	5.10012	4.85185	4.3414	5.68974	5.80107	4.6374	5.48966	4.94934	5.6888	4.46569	4.92797	5.43462	4.01185	5.48222	2.42406	3.5992	4.32319	5.31507	4.32879	5.52804	4.06614
ZNF721	9.57317	10.6556	10.0652	9.96913	10.0639	9.75405	10.0822	9.69853	10.0559	10.1042	9.41497	10.2763	9.53205	10.0536	10.1181	9.43471	10.0862	10.0405	10.0907	9.96792	9.70139	9.8952	9.88878	10.1293	9.95277	9.3151	9.92028	10.1568	9.69326	9.73924	10.0388	10.7376	10.3321	9.82926	10.2456	10.2899	10.4912	9.50524	9.86103	9.90031	9.37316	10.116	8.42021	10.013	10.212	10.4816	9.65635	9.99117	8.80369
ZNF720	5.76477	6.10604	5.73797	5.98167	5.55708	6.22385	6.17496	5.46696	6.30824	5.81001	6.128	5.78695	6.25658	6.32823	5.78807	5.81197	5.65742	6.12515	5.97444	6.10988	5.73939	6.11924	6.44047	5.93695	5.77943	5.29423	6.12203	6.39845	5.68055	5.99622	6.01526	6.29179	5.61679	5.82243	5.70999	6.12657	5.99022	6.18733	6.27673	5.82021	5.86024	6.12733	6.11469	5.59323	6.12448	5.95787	6.07122	5.53817	5.38999
ZNF718	3.22372	4.81619	3.39282	4.06194	3.77151	2.42527	4.67814	2.71888	4.29282	4.47491	2.48536	4.4852	4.69085	4.77523	4.31701	1.8133	4.38722	3.84682	4.80228	3.52064	2.66373	4.81619	4.13939	2.63917	2.29896	3.60922	3.16085	3.64108	4.22329	4.67814	4.66782	5.06313	4.14585	3.73643	5.10353	4.72421	4.37961	4.1258	4.32607	3.00442	2.7939	3.8326	3.79055	2.83641	3.84018	4.05448	4.46439	3.28397	3.67042
ZNF713	7.77223	7.89851	7.61221	8.01738	8.11334	8.03783	7.67498	7.44344	7.78857	7.95666	7.17235	7.97352	7.88203	7.37393	7.71146	8.35344	8.4427	7.53846	7.97002	7.02607	7.63149	8.42242	7.74487	7.96614	7.78918	7.87088	7.43468	8.41072	7.89355	7.94194	7.81081	7.91159	8.26445	7.34849	7.79709	7.48952	7.6767	7.67302	7.35726	7.77531	7.59746	8.22469	7.63089	7.70708	7.3825	8.48091	7.43024	7.846	8.58424
ZNF711	2.94856	3.782	3.89645	4.90748	2.41086	3.47522	2.76441	1.87845	3.96091	4.16198	1.87634	4.53994	2.36802	3.80763	2.85348	4.52493	4.18803	4.04433	2.94302	3.46987	4.32011	3.47722	3.61967	3.49205	4.09834	3.4887	4.98887	3.49205	4.24123	4.0323	3.27075	4.45909	5.74048	3.73171	4.94494	4.28462	3.74259	3.9685	3.33108	3.1159	4.01778	4.33553	1.97915	3.00929	1.78458	4.04433	4.0166	5.2114	3.73463
ZNF71	5.89668	5.90211	6.01808	5.92713	6.19021	6.51303	5.93856	6.29329	6.05829	5.72261	6.18736	6.57484	6.27368	6.53192	5.91007	5.94426	6.72831	6.41782	6.50575	6.19663	6.36138	6.02113	6.15042	6.66855	6.26054	6.69745	6.41199	6.64278	6.92665	6.41199	6.06617	6.24733	6.8685	5.91763	6.69334	5.73252	6.2188	6.49298	6.25944	6.6066	6.00857	6.31718	6.59881	5.89415	5.91233	6.47583	6.22209	6.50345	6.51707
ZNF708	3.01926	2.13591	2.32505	2.54111	2.50282	4.1414	1.76258	2.76079	4.43112	3.97812	1.03006	3.32142	4.25466	3.82981	2.3371	4.96578	5.85413	1.87888	3.74777	2.16919	1.03006	2.9329	2.23271	2.8704	2.81924	1.28087	2.49495	1.8916	5.11505	2.70471	3.49191	4.00452	6.14257	1.03006	2.64388	2.55509	2.21913	4.10843	2.94515	3.67371	2.13233	1.44798	5.33563	2.66158	1.03006	3.9938	2.28728	3.72043	1.33175
ZNF707	7.18818	7.49837	7.62291	7.36832	8.1634	7.59537	7.67733	7.8319	7.49088	7.48526	7.17796	7.84591	7.49088	7.61396	7.64197	7.77259	7.72903	7.81508	7.89658	7.6956	7.85871	7.89539	7.53602	7.70305	7.49888	7.91246	7.68397	7.53437	7.88441	7.44765	7.51584	7.71208	7.96132	7.77259	8.03015	7.61071	7.47619	7.96457	7.77037	7.50695	7.568	7.65414	7.63601	7.56456	7.53466	7.76947	7.85764	7.84709	7.53066
ZNF706	8.71955	8.84941	8.39026	8.16742	8.61321	8.56808	8.27554	9.29543	8.56145	8.98141	8.47514	8.67238	7.74644	8.53161	8.75253	8.59255	8.93543	8.57347	8.40217	8.68701	9.04918	7.76498	8.26323	8.76305	8.58821	8.7813	8.66339	8.56944	9.22938	8.79565	8.49153	8.93229	8.63964	8.355	9.06244	8.508	8.8564	7.88496	8.24277	8.90885	8.7313	8.33901	8.22749	8.04689	8.46437	8.70904	8.51682	8.76744	8.68315
ZNF702P	5.50061	4.88788	4.96751	5.58586	4.46503	6.48547	5.49104	5.46874	5.54387	4.87804	6.31172	5.03405	5.31964	5.59026	5.13922	4.66858	5.20516	5.31689	5.93299	5.94969	5.58214	4.06229	5.62563	5.18525	4.96426	5.54948	5.27757	4.95462	4.96896	5.22543	5.67597	5.87437	5.22086	5.03405	4.8846	4.83623	5.98842	5.63636	5.39651	6.35894	4.79811	6.57993	4.24592	4.81737	5.56359	4.30178	5.83075	5.38069	5.94671
ZNF701	6.11971	5.81983	6.27986	6.18375	5.98654	6.07798	6.58725	6.17556	6.00189	6.57315	6.9564	6.79034	5.97562	6.82537	6.18172	5.70523	6.27335	6.25912	6.8221	6.33902	6.09291	5.93282	6.50989	6.32339	6.14634	6.16145	6.19192	6.382	6.27181	6.11382	6.28489	6.43246	6.41237	6.06526	6.3258	6.11577	6.61168	6.55482	6.58997	6.64432	5.87706	6.74164	5.89916	5.79436	6.1391	6.44755	6.36809	6.42403	6.21201
ZNF700	7.8777	8.39944	8.40279	8.53668	8.14614	8.32902	8.38153	8.12922	8.42399	7.93102	8.18647	8.13825	8.44596	8.29211	7.86664	7.53356	8.18749	8.31997	7.99013	8.33241	8.16605	7.83497	8.16645	7.89349	8.06489	7.35327	8.28781	8.13825	7.86546	8.3526	8.37261	8.61706	8.30157	8.11554	8.16281	8.61745	8.38769	8.6701	8.60067	8.23231	8.32412	8.24014	6.27258	8.15927	8.33658	8.39025	8.40212	8.12572	7.61114
ZNF7	8.97948	9.09416	9.14948	9.15184	9.13389	9.24986	9.06089	9.6553	9.2148	9.06901	9.07864	8.90454	8.92721	8.81294	9.05664	8.18898	9.15623	8.85886	9.04675	9.35299	9.2385	8.77386	9.01602	9.02639	9.06828	9.06828	9.17677	8.81415	8.77761	9.10655	9.09927	9.01602	8.89093	8.83178	9.46996	9.20389	8.89415	9.2279	9.32572	9.04185	9.35488	9.04502	8.95307	8.75172	9.12314	8.83541	9.10422	8.85618	8.95439
ZNF697	5.88038	7.01112	6.64952	7.72704	7.03348	7.23347	7.58465	7.45108	6.85078	7.19282	7.22715	7.67386	6.9917	7.5071	7.38114	8.4224	7.35766	7.30759	7.29986	7.90511	7.49408	7.00733	6.80401	8.15434	6.63947	7.2543	7.20001	7.40756	7.28492	7.9782	6.76958	7.42679	7.64459	6.48572	7.26759	7.08968	7.49772	6.53064	6.65037	8.01552	6.7164	7.37303	7.20625	6.51553	7.12701	7.50544	7.16278	7.41475	7.44574
ZNF696	7.73975	8.10124	8.34882	8.05958	7.93393	8.47397	8.24915	8.59694	8.76215	7.64366	8.41058	7.57588	7.87568	7.78943	8.13704	6.9191	8.29767	7.92659	8.36067	8.50715	8.3613	7.0597	8.10284	7.88306	7.92982	8.28699	8.52539	7.80936	8.1886	8.7874	8.42181	8.08878	7.82444	7.46614	8.84634	7.75591	8.00006	8.50715	8.46819	8.61573	8.15785	7.66917	8.88083	7.46891	8.10683	7.58655	8.20445	7.48848	8.61062
ZNF695	3.63465	4.76091	2.56046	3.6673	4.94036	3.12342	4.08673	4.54313	3.73385	4.01279	4.30069	4.58771	3.5327	3.01612	4.27548	4.52316	4.62838	3.53719	3.54017	3.12993	3.94826	4.23774	2.96882	4.41969	4.09194	2.70191	3.6655	3.86244	1.94581	4.10361	3.43248	4.63154	4.68582	3.68362	4.44549	3.56055	3.45317	4.08764	3.45317	3.33243	3.64803	3.81213	3.6201	3.81805	4.00663	4.17006	3.06683	3.4615	3.2244
ZNF692	9.14682	9.07858	9.43959	9.3449	8.787	9.07953	9.09444	9.11881	9.4595	8.72028	8.49181	9.12033	9.06692	8.8642	9.17138	8.44918	9.35232	8.74838	9.28124	9.45316	9.27152	9.43431	9.06391	8.7691	9.43371	9.20723	9.25789	9.55167	9.2314	9.03091	9.50101	8.97569	8.77013	8.87778	9.43925	8.78587	9.18152	9.18669	9.31161	9.05141	9.22355	8.78243	8.7908	8.47514	9.34873	8.90276	9.18072	8.8891	9.11176
ZNF691	6.4442	5.84126	6.77835	6.23739	5.80935	6.04251	6.41119	6.23468	6.50791	5.79956	6.43415	6.05694	5.94113	6.4933	6.20411	5.26746	6.70844	6.14465	6.42733	6.54379	6.60735	6.05561	6.62588	5.94483	6.47332	6.81599	6.62275	6.80958	6.82853	6.35882	6.2812	5.75397	5.45988	5.81518	6.59627	6.04351	6.5784	6.85068	6.60924	6.40939	6.3547	6.22223	6.70319	5.32624	6.16275	5.8583	6.71781	6.26324	6.86017
ZNF69	9.13382	8.76799	9.78141	8.60984	7.84837	8.54022	9.00044	7.79616	8.67116	8.4108	9.21627	8.74693	8.35425	9.39507	9.07676	6.84117	9.06882	9.13277	9.04366	8.73153	9.33693	8.6298	8.75768	7.65983	9.00278	9.50069	9.33323	8.17211	8.73847	8.85056	8.33839	8.17211	9.00689	9.02525	9.02204	8.77598	9.31723	8.89113	9.06882	9.27118	8.77652	8.89622	8.3626	8.82915	8.86627	8.51416	9.09013	7.89521	9.05924
ZNF689	8.69727	9.02351	8.42832	8.83627	8.80741	8.33419	8.86495	8.90835	8.78966	8.42263	8.71978	8.58665	8.66428	8.60496	8.83445	8.93019	8.89867	8.68525	8.38656	8.63069	8.49256	7.79228	8.71852	8.5101	8.43884	8.91764	8.72097	8.41491	8.58996	8.83195	8.60186	9.14081	8.73517	8.79606	9.13012	8.80386	8.72649	9.09984	8.48819	8.84633	8.75441	8.70869	9.22222	8.43823	8.93833	8.954	8.52517	8.28628	8.89524
ZNF688	9.8702	8.97709	9.23253	9.02732	8.61194	9.04866	8.98462	8.14779	9.11596	8.79368	8.94784	8.99941	9.02116	9.04804	8.98132	8.46695	9.52405	9.01359	9.41389	9.10215	9.24702	8.86092	9.06664	8.60125	9.3508	9.54892	9.22399	9.21091	9.29705	8.93104	9.46385	9.09168	8.48542	9.02116	9.08231	8.77662	9.05497	9.47641	8.98591	9.14696	9.22257	9.18859	9.49	9.26295	9.13367	8.97859	9.34704	9.29921	9.46304
ZNF687	6.67892	5.85497	5.89046	6.19248	6.32439	6.09918	5.92259	5.83703	6.59612	5.99237	6.45922	6.45472	6.25856	6.13534	6.3851	5.83041	6.11715	5.98242	6.50261	6.39996	6.47216	6.31596	6.14522	6.07568	6.26934	6.45808	6.74342	6.36418	6.58243	6.25658	6.20298	6.03329	6.23095	5.97296	6.25361	6.31624	5.87183	6.40905	6.41581	6.48177	6.44638	5.95485	6.70904	5.96392	6.09738	5.84192	6.15433	6.49105	6.37227
ZNF684	6.53967	6.75527	6.0852	6.70847	5.76515	6.48834	6.22316	5.90518	6.54619	5.92481	6.56964	6.49375	6.15287	6.78379	6.1814	5.54002	6.52477	6.81347	6.83711	5.93733	6.74397	5.84071	6.60912	6.31492	6.12378	5.56423	6.58104	6.48074	6.17302	6.67546	6.64899	6.97098	6.47835	6.66857	6.63379	6.46755	6.73892	6.4905	6.53022	6.5451	6.58793	6.78568	4.34607	5.2356	6.60715	6.37896	6.29987	6.03539	5.94354
ZNF682	7.90284	9.09144	8.29957	9.552	9.99714	8.64818	9.30769	8.20363	9.53213	8.52206	8.76215	8.80692	9.4277	8.85154	8.64953	8.24688	9.02469	8.78928	9.82415	8.28278	8.85154	8.7558	8.92372	9.00902	8.31969	8.71313	10.6189	9.84155	9.08731	9.02653	8.92976	8.13497	9.13988	9.88327	9.45552	8.7907	9.91419	9.03297	8.21519	9.07035	8.72587	9.41841	8.07619	7.30617	8.99371	8.41717	8.70758	8.43477	8.64323
ZNF680	4.26998	4.08315	5.80418	4.17562	5.76334	7.07103	7.13197	4.1031	4.14425	4.15019	4.49708	6.94819	4.07555	6.96312	5.14821	4.1149	7.56994	6.7066	6.31931	5.02793	4.38808	4.09485	7.38586	6.68016	5.93657	5.32737	4.34326	7.15111	6.77438	4.11183	4.16237	7.08318	6.33155	4.05349	6.64939	4.07555	6.8055	4.15382	4.04602	7.25865	4.05005	6.37159	4.14754	4.74347	5.20727	6.10536	4.49639	6.62374	4.19843
ZNF676	3.26438	3.17129	3.73915	3.58419	3.25592	4.11393	4.6592	3.85306	3.28577	2.31738	3.99785	4.36932	4.04573	4.15297	2.44269	2.41675	3.94878	4.39217	4.96021	3.26438	3.5685	3.08706	3.09032	4.29288	4.04124	3.68675	4.48719	4.6896	4.45656	3.69936	3.68434	4.85094	5.10056	2.89814	4.16373	2.99938	4.41576	5.14805	3.37058	4.22331	2.77837	4.05736	2.13014	3.29459	3.69448	4.41403	2.95012	5.99231	2.45328
ZNF675	5.26303	6.23938	6.84366	6.65707	6.2435	6.37961	7.23776	5.87545	5.70374	6.29914	6.23211	6.86949	5.79338	6.98636	6.42483	5.79056	6.59306	7.41993	7.01766	6.32952	6.06689	5.73537	6.51365	6.38728	6.78398	5.80353	6.42191	7.19358	6.47025	6.38143	6.89504	6.91007	6.87374	6.24797	6.88058	6.47898	7.07103	5.82856	6.03515	6.81289	5.70646	6.95577	5.14109	6.04132	6.25894	6.65599	6.13434	6.88385	5.63572
ZNF674	8.34622	9.60261	7.94028	8.08357	8.67179	8.91052	9.62099	9.04903	8.46436	9.40015	8.21417	8.50463	8.4911	9.35884	8.11793	10.2342	9.27287	9.40015	8.32458	8.18142	9.50887	9.8611	8.45107	8.45693	8.06716	8.38097	8.7326	9.45502	7.94028	8.46678	8.46678	9.88143	10.1286	8.42237	9.56507	8.63	9.54288	8.46436	8.15757	8.58831	8.63	8.27102	8.5348	8.85671	9.04325	10.094	8.20013	10.256	8.81143
ZNF673	7.30963	7.63001	7.70039	7.14802	7.18887	7.52273	7.53621	6.96083	7.67004	7.64197	6.97866	7.84827	6.78755	7.56147	7.5892	6.80644	7.75959	7.69834	7.86423	7.63529	7.85873	7.78821	7.4591	7.45	7.43294	7.22284	7.75102	7.84884	7.38557	7.69622	7.29238	7.66883	7.62657	7.46387	8.15541	7.61172	7.55482	7.42026	7.20694	7.78467	7.35932	7.444	6.31569	6.78696	7.60355	7.32294	7.5327	7.3112	7.3302
ZNF672	10.0139	9.72665	9.87704	9.83662	10.3495	9.55713	10.0831	10.6537	10.0571	9.98663	9.78889	9.96493	9.99351	9.82058	9.94185	10.5021	9.70022	9.7532	9.79328	9.61198	10.0415	10.1091	9.95076	10.2119	9.81547	10.0542	9.7919	9.7959	9.92079	9.88529	10.0401	9.59998	10.0991	10.0818	9.76728	9.67966	9.90867	10.6323	10.214	9.76337	10.0682	9.89473	10.2344	9.92536	9.81197	9.73341	10.1114	9.79619	10.1137
ZNF671	9.05689	9.30535	9.14756	9.30252	8.37039	8.64897	9.17028	8.49242	9.29555	8.59459	9.15529	8.86831	8.59119	9.29741	8.87223	7.74518	9.56436	9.28596	9.30118	8.94218	9.24171	8.33112	9.31946	8.69591	8.93612	9.59486	9.416	9.30252	9.6114	9.36846	9.06413	8.41219	8.41219	8.57803	9.09713	8.56805	9.23478	9.72561	9.11482	9.45206	9.32843	9.37905	9.13343	8.37204	9.28948	8.7285	9.24346	8.96648	9.25274
ZNF670	4.69801	5.66314	5.33018	5.21255	5.97927	5.55458	5.58478	6.02235	5.64111	5.48497	5.53892	5.85748	5.43712	5.17017	5.2606	6.18272	5.69803	5.53539	6.04615	5.6228	5.59517	5.35653	5.47309	5.58001	5.40547	5.38521	5.68226	5.1929	5.39547	5.79149	5.46166	5.72631	6.01187	5.097	5.95766	5.33632	5.26346	5.33018	5.71959	5.61389	5.22975	5.53704	4.66592	5.45218	5.54533	5.29658	5.10831	5.37732	5.3398
ZNF669	4.11461	7.18324	6.3368	6.21271	6.81292	7.1581	7.35054	7.15973	6.79965	6.67013	7.34039	7.19154	7.21503	6.73746	6.62901	6.30002	7.00627	7.00467	6.94512	6.9086	7.04872	5.51114	6.73393	6.41609	5.46354	7.0846	6.60459	5.29041	6.3796	7.59751	6.452	7.28202	6.63137	6.99723	7.48272	6.96866	6.9846	7.2727	6.82373	7.13439	6.71003	6.74837	6.44304	5.8845	6.23998	6.15988	6.88137	4.81116	6.80146
ZNF667	4.84201	5.60142	4.93318	5.65882	5.41904	5.39958	5.27683	5.63264	5.21769	5.33597	4.97161	5.29848	5.47519	5.55389	5.16746	4.57133	5.53597	5.74191	4.94233	4.83592	5.7667	4.0684	5.23704	5.04947	5.16058	5.08913	5.64888	5.38453	5.38695	5.73323	5.31716	6.14536	5.95374	5.00189	6.26286	5.00614	5.49749	4.68404	5.25632	5.4915	5.01768	5.53019	4.45282	4.75648	5.47585	5.24936	5.11379	4.89802	5.31157
ZNF664	10.1384	9.33727	9.95826	9.58716	9.47229	9.71179	9.61927	9.13057	9.71684	9.59196	9.50244	9.92496	9.1821	9.68887	9.71274	9.24676	9.43879	9.83103	9.65381	9.67164	9.64177	9.78494	9.31613	9.90931	9.77786	9.67337	9.80924	10.0176	9.78626	9.41499	9.76613	9.40838	9.873	9.75422	9.60744	9.68945	9.80118	9.27977	9.59074	9.44557	9.82967	9.77396	8.79261	9.60038	9.54361	9.17797	9.76684	9.86438	9.5019
ZNF660	4.33301	5.18011	4.10486	4.13807	5.15878	5.06806	4.89119	4.77034	5.21061	4.93935	4.82013	4.76003	4.51243	4.89774	4.8645	3.95845	3.90288	4.52771	5.02475	4.23571	5.56458	3.15409	4.71756	4.49323	4.31047	4.22045	5.46492	4.5541	4.70598	5.37249	4.31306	4.9028	5.12851	4.62149	4.71436	4.9687	4.95289	3.66255	5.04128	4.86123	5.03017	4.55511	3.64303	3.92196	5.56328	4.01512	4.40457	4.75331	4.72516
ZNF658	7.10639	7.04259	7.24283	7.07502	6.32658	6.65875	7.12441	5.84875	7.15371	6.59253	7.08513	6.7083	6.32396	7.25097	7.33415	5.47028	6.94693	6.93242	7.34719	6.98948	7.1694	6.30612	6.97408	6.33406	6.91621	7.06154	7.40855	6.69928	6.9102	6.93343	7.62477	7.34947	5.82193	6.61108	6.99163	6.95174	6.94215	6.85194	6.81006	7.03973	6.99163	7.21235	6.26137	6.26067	7.19894	6.57704	7.0469	6.17665	6.61488
ZNF655	7.50833	7.55524	7.98237	7.85147	8.00305	7.62004	7.81484	8.08789	7.68264	8.01932	8.29423	7.9703	7.98015	8.13796	7.69763	8.23936	7.56767	7.75397	7.72694	8.14175	7.87518	7.98455	7.78438	8.10602	7.71022	8.02126	7.92479	7.79758	7.74928	7.7629	7.92509	7.42833	8.03928	7.89793	7.69964	7.97303	7.90644	8.11049	8.00994	7.51758	7.80672	7.95865	8.03658	7.08679	7.54806	7.70968	8.24955	7.66273	8.01667
ZNF653	7.93668	7.28842	7.42334	7.37218	8.03618	7.74316	7.46779	7.48569	7.48788	7.82094	7.45587	7.66933	7.44619	7.19047	7.56997	7.85436	7.48233	7.47382	7.90267	7.68867	7.67261	7.27478	7.08316	7.60233	7.50093	7.72027	7.47587	7.58172	7.41874	7.58588	7.14315	7.46318	8.21359	7.77795	8.14824	7.14479	7.51465	7.78487	7.54505	8.19883	7.4783	7.25671	8.14401	8.1211	7.56618	7.51702	7.39488	7.43649	7.5733
ZNF652	11.1563	10.8215	10.7559	10.5439	10.4461	10.3269	10.4973	10.8112	10.7976	10.2825	10.8821	11.0504	10.562	10.8059	10.9117	10.5145	10.7233	11.1477	10.0876	10.5522	10.7099	10.5832	10.5845	10.2244	11.2091	11.2836	10.5116	10.802	10.7006	10.8565	10.5753	10.5625	9.77969	10.8957	10.2825	10.8678	10.4811	11.1415	10.5726	10.7447	11.0543	11.4512	10.9999	10.1731	10.6395	10.5661	10.8808	10.6555	11.2452
ZNF649	6.45695	6.39451	6.1558	6.26668	7.1176	6.51366	6.62082	7.36602	6.42146	6.82822	6.57364	6.93996	6.26668	6.94724	6.56294	6.29563	6.57958	6.81418	6.99973	5.99239	6.8891	5.97245	6.59613	7.34502	5.84788	6.94487	6.71084	6.42146	6.51794	6.79373	5.90149	6.93279	7.23328	6.68889	6.89172	6.16086	6.74456	6.61887	6.50988	6.95766	6.28861	6.37522	6.71238	6.25793	6.70578	6.03724	6.4538	6.79324	6.59106
ZNF646	7.97739	8.06995	7.88204	8.01306	7.89225	7.45288	7.99016	7.74082	8.12498	7.70933	8.0897	8.12567	7.8374	8.0706	7.92732	7.99391	7.76356	7.98338	7.98273	8.02354	8.17586	7.65926	7.90754	7.74082	7.67942	8.27893	8.1469	7.92019	8.06586	7.87233	8.1469	7.70345	7.56827	7.86845	8.07134	7.70996	7.85374	8.27466	7.87559	8.0879	7.92019	7.92272	8.39312	7.57949	7.88408	7.88469	7.95754	7.71864	8.21521
ZNF644	9.4074	9.85593	9.50076	9.17449	10.2677	9.46526	9.85268	9.41864	9.4957	10.1039	8.68602	9.50795	9.47083	9.31694	9.58612	9.81842	9.24954	9.68656	9.65673	9.38221	9.25964	9.1319	9.33354	9.49085	9.12642	9.41119	9.33107	9.33225	9.01522	9.47644	9.67099	9.41946	9.93583	9.64693	10.1586	9.20518	9.5637	8.79971	9.25905	9.25012	9.28816	9.30594	8.45417	9.31976	9.57729	9.90816	9.2045	8.98138	9.25012
ZNF643	3.66439	4.66532	4.42203	4.76822	4.82583	5.0741	5.06386	5.11629	4.33976	5.17988	4.70924	5.36464	5.18263	5.09765	4.38275	4.95342	3.46923	4.71518	4.37378	5.14482	4.77202	4.68809	4.95597	5.23307	4.71215	4.26815	3.23165	4.87514	3.933	4.6324	4.54178	4.66174	5.27492	4.61756	4.90554	4.8157	4.80992	5.28808	5.49884	4.88958	4.05565	4.97548	3.95273	5.31629	4.40672	4.52062	4.96259	4.44156	3.88504
ZNF642	5.17838	5.49227	5.33311	5.31635	4.79775	4.83477	5.33311	4.90231	5.23107	5.34113	5.26203	5.31812	5.21105	5.77988	5.33007	5.16445	4.78476	5.28169	5.3622	4.93844	5.70932	4.91995	5.60393	5.26527	5.11731	4.87663	5.78364	5.34956	4.92207	4.91532	5.62091	5.4024	5.28169	5.02626	5.68876	5.25548	5.12077	5.56536	5.30476	5.00554	5.4852	5.68677	4.44858	4.74883	5.34792	5.29588	5.35758	5.18475	4.57117
ZNF641	7.46836	7.1413	6.73143	7.23502	7.25245	7.4312	7.91186	7.87326	7.76953	7.41901	7.88503	7.63098	7.18224	7.52015	7.35549	7.29038	7.28527	7.35005	7.41034	8.03962	7.4738	6.99799	7.60097	7.55442	7.35005	7.58671	7.16801	7.6029	7.32904	7.91729	7.17803	7.21763	6.95801	7.51444	7.17603	7.33581	7.43508	8.36722	7.37956	7.26055	7.32593	7.1188	7.63984	6.54266	7.53077	7.54014	7.39217	7.06575	7.68291
ZNF638	5.44185	5.54924	6.01312	5.70802	6.81173	6.26676	7.04228	6.72268	4.92006	6.17323	6.25381	6.52124	6.09712	6.40473	6.08207	6.26298	6.03652	6.54194	7.05069	5.85425	6.17949	6.08711	6.39334	6.6956	6.07148	6.03371	7.19847	6.71247	6.46142	6.57878	6.22154	6.60408	7.57327	6.11773	6.22436	6.49953	6.074	6.13543	6.17152	6.69007	5.50401	7.02328	5.92851	6.05922	5.9986	6.61481	5.81705	6.88367	5.26424
ZNF630	5.97745	6.1039	6.17834	6.11526	5.74745	5.79919	5.78745	5.22164	6.42411	5.52556	6.03264	5.92308	5.77847	6.03993	6.19702	6.25375	5.81639	5.7513	6.59697	5.95344	6.6297	5.95673	6.24191	4.75453	5.9103	5.97745	6.09682	6.49254	5.88149	6.2207	5.72158	6.90502	5.81639	6.1348	6.19274	6.06403	5.96287	6.32384	6.23345	6.21121	6.1453	5.98971	5.51341	5.00952	5.94637	5.80269	6.1252	6.26372	6.05391
ZNF629	9.16002	8.83733	8.9553	9.03077	9.23849	9.42087	8.94115	9.29102	9.19308	8.83392	8.97469	8.82723	9.00123	8.79339	9.19758	8.49702	9.17648	9.00008	9.23006	9.29868	9.43071	8.62861	8.98047	9.23458	8.84399	9.40993	9.23432	8.93628	9.14324	9.16054	8.9051	8.9417	9.40049	8.92915	9.35108	9.15665	8.8422	9.08169	8.96859	9.1839	9.24094	8.82399	9.38495	8.94704	9.05849	8.96151	8.99237	8.88578	9.27118
ZNF628	6.26599	6.57931	5.97488	6.16706	6.44244	6.77767	6.20579	6.3271	6.50957	6.37977	5.89893	6.23159	6.51484	6.05316	6.22413	6.46706	6.42763	6.06499	6.54027	6.84132	6.26945	6.59098	5.87718	6.3667	6.13603	6.34473	5.9743	6.25433	6.33817	6.11279	6.04501	6.46809	6.20054	5.54472	6.63283	6.35245	5.90214	6.42634	6.28388	6.26289	6.27334	5.988	6.93545	6.76463	5.85978	6.19762	6.4374	6.53182	6.37659
ZNF627	10.0331	9.21041	9.31819	9.40527	8.76955	9.27415	9.02095	9.0198	9.41758	8.54184	9.51374	9.01908	8.77773	9.32229	9.46072	8.27052	9.34949	9.39426	9.29165	9.30766	9.31979	8.89668	9.35512	8.74281	9.38931	9.31515	9.47931	9.41521	9.26818	9.40855	9.39239	8.70616	8.95859	9.37188	9.29579	9.09528	9.46981	9.12837	9.03658	9.27366	9.63822	9.38354	9.07593	9.07252	9.4306	8.78789	9.24777	9.22627	9.07715
ZNF626	7.93122	8.3809	8.84221	7.97018	8.22464	8.19318	8.71082	8.00912	8.22489	8.26404	8.36337	8.69342	8.26683	8.48398	8.4513	7.90372	8.63365	8.59899	8.57339	8.23903	8.44357	7.84671	8.22964	8.233	8.65705	8.8472	8.54927	8.91515	8.60288	8.55863	8.81333	8.12791	8.16821	7.9652	8.8251	8.68592	8.60033	8.09827	7.76641	8.55268	8.26046	8.29706	8.39112	7.47676	8.54518	8.45597	8.87574	8.47204	8.46582
ZNF625	3.66445	4.05534	4.44189	4.02483	3.99043	3.86643	4.54852	3.15286	4.42239	3.94191	4.33836	4.75225	3.41256	4.37255	4.10339	3.71002	4.05683	4.2246	5.09835	4.11798	4.27504	3.4526	4.48479	4.04892	3.93405	3.955	5.2442	4.73218	4.23889	4.43803	4.54295	4.29388	4.93119	3.66645	4.48972	3.66645	4.80807	3.54446	3.81226	4.49842	3.45534	4.20425	3.39344	3.49065	3.56902	4.424	4.6154	5.36587	4.3132
ZNF624	5.8745	6.21066	6.08233	6.25014	4.62175	5.85892	5.85376	4.87555	6.00183	5.81856	6.13914	5.87854	5.66728	6.10172	6.0063	4.90805	6.10245	6.44183	6.04778	5.88887	6.20584	5.80894	6.19001	5.49382	5.4594	5.33568	6.53285	6.09159	5.83166	5.84323	6.29561	6.49407	5.23183	5.00567	5.84375	6.16098	6.16059	5.31471	5.77444	6.30482	5.73659	6.21558	5.69438	4.68395	5.89811	5.80384	5.88248	5.68025	5.65082
ZNF622	10.3382	10.2294	10.3956	10.215	10.5248	10.3502	10.3622	11.0093	10.4016	10.3502	10.7176	10.3836	10.2914	10.2714	10.3066	10.2976	10.5042	10.2213	10.2277	11.1371	10.4137	10.3481	10.3707	10.4195	10.1878	10.5295	10.6685	10.2294	10.412	10.4151	10.2694	10.26	10.3985	10.3207	10.2958	10.3682	10.3422	10.7947	10.7052	10.274	10.4468	10.5301	10.9279	10.4722	10.2294	10.2609	10.4921	10.3655	10.6027
ZNF621	6.95274	7.52861	7.09661	6.54368	7.27905	7.82075	7.25528	7.47584	7.07574	7.68352	6.9556	7.54666	7.11883	7.1229	6.74669	6.69021	8.02701	7.26091	7.56276	6.13417	6.94792	6.87955	7.26222	7.35362	7.09249	7.19351	7.4697	7.56922	7.42235	7.24043	6.88159	7.50208	7.29018	6.07569	7.76484	7.18934	7.04621	6.80912	6.65882	7.16889	7.04621	6.45721	7.02504	6.50508	6.55153	6.8317	7.25796	7.57283	7.09786
ZNF618	8.32439	8.68111	8.60292	8.5636	7.81554	9.00748	8.61161	7.52814	8.59975	8.62942	8.40335	9.25021	8.33231	9.01994	8.64528	8.54999	9.11553	9.18539	9.21013	8.56205	9.22517	8.84998	8.79618	8.62942	9.35099	9.16147	8.58793	9.41599	9.58226	9.05371	8.74389	8.9467	8.49833	8.12385	8.80782	8.63551	9.18972	8.54948	7.93151	9.07003	9.041	8.89785	8.68241	7.17769	8.36892	8.81197	9.01049	9.39098	8.71656
ZNF614	6.90957	7.08429	7.51297	7.10624	7.85021	7.84938	7.89947	7.32308	7.05023	7.1659	7.1352	7.56411	7.27756	7.71758	7.14517	7.15898	7.53336	7.70771	7.80169	6.93285	6.9449	6.85367	7.43977	7.85942	7.48657	7.109	7.25962	7.50297	7.64386	7.3883	6.6997	7.78737	8.10346	7.16085	7.67025	7.24471	7.46932	6.92944	7.46501	7.50125	6.72643	7.66192	7.62603	7.39318	7.30234	7.38735	7.10724	7.54628	7.0253
ZNF613	8.51273	8.37411	8.62727	8.37795	8.50041	8.55626	8.7079	8.45172	8.71105	8.61512	8.56318	8.46277	7.96695	8.74898	8.59203	7.42776	8.80643	8.67135	9.17769	8.65387	8.66688	8.31787	8.68462	8.58656	8.3717	8.36662	8.73433	8.77134	8.56679	8.32531	8.48609	8.39613	8.77189	8.24196	8.56342	8.37411	8.741	8.77248	8.60795	8.68968	8.45338	8.45338	8.29446	7.97533	8.65022	8.2646	8.73058	8.72522	7.97749
ZNF610	5.5648	5.1796	4.81483	4.84199	4.29082	4.90381	4.82738	4.22077	5.10256	4.52275	4.9709	5.41343	4.97371	5.34892	4.68832	3.13585	5.38237	5.28455	5.35328	5.51953	5.05806	3.85594	5.11857	4.1189	5.0695	4.90258	5.42473	5.03843	5.23063	5.30851	5.55713	5.69812	4.09339	4.14062	5.42178	4.92286	5.72028	5.07427	5.02137	5.53796	5.15547	5.29738	4.39306	3.3159	5.13986	5.07694	5.04235	4.57798	5.04103
ZNF609	7.76027	7.41348	7.74182	7.30415	7.65789	7.12833	7.48107	7.81565	7.95548	7.12499	7.48512	7.47773	7.45599	7.45999	7.3417	7.77334	7.09764	7.40351	7.14894	7.6407	7.54111	7.26753	7.35009	7.2937	7.02641	7.95255	7.62987	7.25436	7.2475	7.57958	7.11909	7.23585	7.4982	7.16807	7.81694	7.22266	7.65901	7.55684	7.68835	7.76948	7.43088	6.80852	7.87682	7.06656	7.60716	7.33145	7.54647	6.94871	7.65287
ZNF608	7.1087	7.49244	7.79637	7.51475	6.34842	6.75856	7.54783	7.36393	7.501	7.10213	7.2808	7.9904	7.66818	7.6833	7.14525	7.66098	7.52644	7.77038	7.79507	7.03778	7.44998	7.42883	6.94764	6.90231	6.80127	7.52396	7.20397	6.94924	7.17654	7.85334	7.56476	7.05629	7.16447	7.42572	7.48216	7.88838	7.50137	6.63576	6.34931	7.3342	7.4042	7.20274	6.52191	7.27396	7.4341	7.50064	7.29081	6.59915	7.54412
ZNF607	6.61809	6.29875	6.49439	6.40235	6.23803	6.59423	6.58434	6.43942	6.63632	6.12509	6.73682	6.36594	6.55912	6.49259	6.3709	5.92859	6.862	6.44915	6.67619	6.75898	6.49168	6.39479	6.5183	6.40134	6.65899	6.84834	6.57247	6.66659	6.76506	6.77001	6.42994	6.6281	6.25417	6.34732	6.59248	6.64202	6.48608	6.80604	6.61327	6.57922	6.56781	6.4461	6.78197	6.31191	6.71658	6.41995	6.63322	6.8113	6.68315
ZNF606	7.17432	6.54875	6.84126	6.91835	6.21834	6.57198	6.24619	6.1948	6.46282	6.09578	6.67833	6.37927	6.26791	6.64624	7.21157	5.46034	6.83496	6.78406	6.7663	6.88147	6.74163	6.39695	6.45342	5.92795	6.60812	6.51757	7.13677	6.82245	6.52951	6.93747	7.00882	6.62242	5.96776	6.54875	6.93829	6.78585	6.59822	6.2092	6.18192	6.85956	6.56666	6.8466	6.09288	6.46619	7.03275	6.24078	6.51473	6.5755	6.2709
ZNF600	6.68345	6.90818	7.40839	7.25529	6.9579	6.88837	7.53654	6.96002	6.55721	7.25857	7.15477	6.93477	6.28754	7.28986	6.82918	6.31566	7.05196	7.13739	7.19046	7.83589	7.46909	6.29443	7.21272	7.21493	7.18114	6.14348	7.42086	6.96941	6.60498	7.33511	7.04387	7.028	7.22112	6.87475	7.37083	7.30527	7.40434	7.06742	6.91154	7.09294	6.17733	7.16688	5.77046	7.13584	6.80772	6.71343	7.18864	6.74254	6.11484
ZNF599	5.0553	4.44963	4.26593	4.86782	2.89946	3.57276	3.42058	4.34194	4.34194	3.04765	4.25183	3.8445	2.66228	4.72887	4.60522	3.05721	4.10704	4.80363	2.75115	3.43127	5.34904	3.34671	4.01255	3.60987	3.3798	5.21315	4.53533	3.81035	4.42966	5.12125	4.19934	4.82688	2.77355	4.08124	4.9437	4.40368	4.9552	3.8794	2.73444	4.58124	5.02407	4.62655	3.22205	3.24243	4.36536	4.12719	4.56364	2.35493	5.01627
ZNF598	9.46071	9.73164	9.34675	9.72683	10.2091	9.65535	9.54796	10.376	9.87871	9.77681	9.63128	9.49562	10.1364	9.34858	9.8282	9.78061	9.54568	9.6203	9.53383	9.95598	9.57346	9.52693	9.60405	10.0767	9.44957	9.68913	9.58622	9.75718	9.50507	9.94555	9.52935	9.81795	10.3272	9.78138	10.0992	9.79982	9.57853	9.7472	10.0527	9.77253	9.66018	9.43835	9.92693	10.3954	9.76873	9.61824	9.62295	9.6214	9.87261
ZNF597	4.79291	4.73953	4.69178	5.04774	5.48161	5.56906	5.26448	4.88183	4.02149	5.70178	4.2201	5.52036	3.70996	4.29989	4.47966	5.24782	4.05178	5.58748	5.83206	3.60342	5.05741	5.53018	4.66625	5.7324	4.97323	4.80778	2.93726	3.39226	5.19119	3.85852	4.88183	4.13617	6.0837	5.16862	5.67548	5.41876	5.87069	4.23123	4.89938	5.54172	5.13814	4.96907	4.72964	4.81664	4.43843	5.40472	5.6095	3.91725	4.72964
ZNF596	4.42928	4.92449	4.45545	4.32583	4.2621	4.69471	4.29923	3.15575	4.40238	4.44056	4.3361	4.56502	4.50941	4.23295	4.91941	2.90654	4.22749	4.47503	4.44056	4.43313	4.73034	3.92922	4.21836	4.29796	4.16263	4.27495	4.0833	4.73415	3.15744	4.53166	4.60522	4.95189	3.45066	4.25159	5.16359	4.95963	4.23447	4.65273	3.85677	3.78802	4.44204	4.47238	2.74958	3.15096	4.81879	4.18797	4.73639	3.89665	4.12598
ZNF594	7.16391	7.23292	7.54703	6.95574	7.22311	7.08953	7.33591	6.65665	7.45221	7.07953	6.85395	7.78533	6.80483	7.4789	7.16853	6.1456	7.74025	7.51701	7.83408	7.33786	7.62447	6.64666	7.17739	7.09663	7.75496	7.04622	7.32916	7.82849	7.68881	7.51123	7.16756	7.50865	7.27061	6.95481	7.86502	7.10875	7.55818	7.26644	7.15104	7.74407	7.09842	7.35499	6.44155	6.11105	7.28298	7.32246	7.63159	7.32825	7.0716
ZNF593	9.6637	10.2191	9.48485	9.70181	10.9272	10.5437	9.87884	11.2903	9.97003	10.0188	9.77226	9.79982	10.4924	10.0223	10.1349	9.75082	10.4067	9.71696	10.1982	9.93968	9.57533	10.7246	10.1668	10.9943	9.87101	9.81434	9.55654	10.3669	10.2526	9.42342	9.69767	10.163	11.0331	9.64513	9.8276	10.0365	9.934	10.2066	10.3163	9.55907	9.34543	9.87824	10.4547	10.5167	9.72066	9.60566	9.62773	9.9521	9.86415
ZNF589	8.00815	6.94364	8.51056	8.46938	7.37262	7.39681	7.85993	6.96463	8.22994	7.83285	8.46088	7.48227	7.26107	7.95079	7.55903	6.46041	7.4235	7.61695	7.73909	7.97149	7.79416	6.81284	7.68451	6.58935	7.89744	7.94437	7.7586	7.90827	7.65434	7.36109	8.16107	7.90827	6.33154	7.24678	7.82767	7.56971	7.7148	8.46886	9.28267	7.30955	8.22015	7.61582	7.73084	6.07479	7.31838	7.67184	8.72995	7.27579	8.23589
ZNF587	5.98842	6.40619	6.22687	6.23148	6.56727	6.2216	6.29268	6.87811	6.2886	5.93212	5.82465	5.97283	6.12245	6.17697	6.28771	6.02334	6.21072	6.17301	6.01218	6.76391	6.00632	6.10561	6.28237	6.16475	6.11992	6.29486	6.18918	5.91337	6.10174	6.42363	6.32101	6.10227	6.22745	6.14909	6.28634	6.14465	6.02435	6.00697	6.34465	6.20911	6.31492	5.82926	6.23521	6.60011	6.33415	5.94537	6.07704	5.73238	6.36426
ZNF586	8.23962	8.11444	7.91701	7.93876	8.09357	7.58912	7.9198	8.92765	8.47187	8.15769	8.28012	7.9934	8.02554	7.96118	7.97091	8.66089	7.8006	7.68623	7.86594	8.07702	8.01956	7.58803	8.15811	7.89097	7.84787	7.95341	7.92657	7.86545	7.76915	7.88067	7.79465	7.84667	7.97365	8.26348	7.9327	7.86594	7.83714	8.41957	8.54715	7.88755	8.30332	8.0822	8.61538	8.05226	7.8793	7.73874	8.01306	7.66165	7.78424
ZNF585B	6.47619	6.37068	6.11096	6.43088	6.19313	5.57855	6.23136	6.06728	6.57242	5.97783	6.5226	6.40101	5.99122	6.29551	6.48725	5.77449	6.27819	6.10002	6.17747	6.22564	6.43141	5.16555	6.34669	5.85089	6.10899	6.34362	6.60309	6.12633	6.14369	6.64209	6.30576	6.31456	6.20636	6.47001	6.53441	6.12436	6.45301	6.0476	6.34424	6.43376	6.31091	6.35648	5.83527	5.54646	6.43088	6.09079	6.36308	5.99998	6.15955
ZNF585A	6.08615	5.79907	5.40744	5.85582	5.16856	5.86716	5.1869	5.76244	6.71543	6.51994	6.68796	5.60917	6.31821	6.09889	6.24305	5.07882	6.88903	5.86716	3.95699	6.20639	7.1252	4.77512	6.2258	4.14412	4.69399	6.47719	4.54075	5.58354	5.26553	6.61014	5.26553	5.38137	6.75197	5.36202	6.99411	5.0424	6.52546	5.45117	5.64611	6.31233	6.23937	5.84322	6.14382	5.65882	6.19144	4.67691	5.32384	3.91955	6.23776
ZNF584	6.82884	6.275	6.0569	6.39653	7.10279	6.47912	6.0541	7.53491	6.20664	6.28028	6.28232	5.73146	6.21875	5.89598	6.11433	6.18146	5.97132	5.8545	5.95402	6.35311	6.00004	5.32725	6.12811	6.60426	6.17488	6.44011	6.21095	6.07838	5.76703	5.86795	6.23367	6.17381	6.94665	6.23998	6.19936	6.42109	6.03089	6.31071	6.65802	6.10395	6.44136	5.96797	6.67545	7.21569	6.40174	5.93771	6.06195	5.86487	6.06328
ZNF583	6.06266	7.2908	6.60617	7.06292	7.41768	6.84088	6.8683	8.02987	6.70435	6.68033	7.07634	7.33458	6.72445	7.07093	7.21384	6.60712	6.74736	7.0826	7.17762	6.6573	7.05806	5.8395	6.94454	7.34472	7.04366	6.713	7.35197	6.85989	6.72321	7.2237	6.96774	7.67349	7.89234	6.94454	7.24566	6.89877	7.13346	6.8575	6.94252	6.89669	6.80935	7.43063	6.89328	6.40186	6.77989	7.21898	6.68138	6.89328	6.8081
ZNF582	4.37956	4.20503	3.36827	4.51422	4.05724	4.33782	4.1258	4.07731	4.14876	4.2312	4.25484	4.67665	3.64964	4.3758	4.70177	3.9849	4.3771	4.49517	5.24849	3.64964	4.20361	3.70689	4.30655	4.81977	4.38376	4.21435	2.6105	2.82866	3.98265	4.60391	4.6118	4.95722	4.22279	4.28676	5.27567	4.10406	4.20084	4.69791	4.02135	4.7273	4.20503	3.60706	2.47777	3.31788	4.32624	3.85175	4.16071	3.10635	4.57008
ZNF581	8.14293	7.99761	8.60079	7.94406	7.91424	8.37144	8.36441	7.71012	8.60376	7.89877	8.37221	8.25799	8.15951	8.35576	7.65108	8.00986	8.86221	7.72994	8.41837	8.22546	8.41242	8.54842	8.43867	8.28017	8.3433	8.38332	8.20762	8.56097	8.9536	8.23616	8.19061	8.6156	7.94668	7.67861	8.19319	8.02738	8.01758	8.96183	8.80868	8.34896	8.13391	8.46534	9.07758	8.02027	7.98513	7.9235	8.47409	8.3736	8.4986
ZNF580	9.32214	9.47551	9.55905	9.31433	9.35263	9.36115	9.18665	9.2355	9.2712	9.18508	8.53339	9.5708	9.59931	9.47921	9.46906	8.9771	9.5077	9.49377	9.72034	9.29708	9.32083	9.65455	9.20285	9.42309	9.61568	9.86071	9.52968	9.58402	9.70106	9.45897	9.3829	9.16772	9.43245	9.01853	9.41427	9.48602	9.15047	9.35321	9.12528	9.20458	9.30429	9.00661	9.44141	8.93655	9.01467	9.31003	9.79566	9.2355	9.64068
ZNF577	9.52489	9.97041	9.53557	10.0178	9.82443	8.42302	9.03939	9.3244	9.75868	9.45433	8.62938	10.2631	9.26528	9.69941	9.91646	8.88979	10.4342	9.25925	9.85651	9.03846	9.48798	9.8567	9.86673	9.18284	9.53214	9.67786	10.0299	9.70719	9.5937	9.46008	9.22325	10.1675	9.53615	8.93419	9.65651	9.70938	10.0866	8.99773	9.53673	9.30105	9.20045	10.0681	8.58787	8.57855	10.0051	9.93742	9.39419	10.2341	9.15295
ZNF576	7.41261	7.31253	7.38749	7.02232	7.2848	7.78825	7.71954	7.81374	7.40129	7.39618	7.53437	7.39543	7.58713	7.33221	7.28869	7.0334	7.52146	7.10027	7.47095	7.70356	7.51212	7.62929	7.58417	7.46049	7.30547	7.6916	7.37974	7.36872	7.52246	7.35767	7.18424	7.48228	6.97714	7.21986	7.49413	7.20299	7.21821	7.87219	7.52853	7.59799	7.22133	7.09708	8.05984	7.37712	7.39066	7.32479	7.39828	7.4489	7.60403
ZNF575	5.90678	6.35344	5.93007	6.22842	5.38278	6.22705	6.27163	5.05915	6.35148	5.82305	6.14303	6.13075	6.17309	5.95708	5.72106	5.69971	6.65019	5.84549	6.3201	6.54383	6.16575	6.54616	6.25046	5.31327	6.12729	6.68801	5.88993	6.27816	6.384	6.46865	5.95764	6.78808	5.3082	5.26081	6.17524	6.03543	5.89566	6.02552	5.87793	6.20398	5.98002	5.82115	6.53714	4.6069	6.06308	6.33441	6.2392	6.18611	6.74115
ZNF574	6.44287	6.15666	6.36797	6.03366	6.56005	6.26351	6.27857	6.7669	6.51473	6.1962	6.25955	6.20172	6.06517	6.13271	6.20906	6.44934	6.76072	6.15816	6.26604	6.53352	6.74213	6.26241	6.26929	6.48653	6.27377	6.74969	6.44595	6.50695	6.58223	6.31797	6.27343	6.43989	6.48653	6.24447	6.59685	6.23119	6.33245	6.73251	6.37195	6.40358	6.42664	6.07012	7.03715	6.44505	6.28696	6.19464	6.39681	6.52654	6.86895
ZNF573	10.0192	9.94563	10.1671	9.90161	9.69648	9.53377	10.0587	9.52882	9.94976	9.64847	9.93514	10.3241	9.52028	10.3003	9.98199	9.30889	10.2087	10.237	10.3453	9.82881	10.3259	9.62054	10.0287	9.70389	10.3697	10.469	10.6151	10.4492	10.5098	10.3501	10.0893	10.0962	9.742	9.73227	10.4501	9.725	10.2514	10.1346	9.6801	10.5203	10.1945	10.3093	9.90203	8.78835	10.0062	10.084	10.3421	10.0662	10.3523
ZNF572	6.56354	5.28118	6.20573	5.76813	5.01049	5.64883	5.98875	5.10951	6.17117	5.3579	5.75569	5.79039	4.74699	5.94878	5.50792	3.75523	6.42052	5.47008	6.5147	6.1612	6.32955	5.77379	6.12356	4.96403	6.20573	6.08955	6.08588	6.23913	6.02553	6.06435	6.16944	5.52814	4.90438	5.27761	5.8784	5.60395	5.97158	6.12788	5.92784	6.05647	6.04704	5.79261	5.44486	4.58984	5.93907	4.63585	6.14708	5.78685	5.92752
ZNF571	6.42596	7.35464	6.48195	6.46736	6.43717	6.05375	6.40551	6.36349	6.71913	6.7936	6.71586	6.54296	6.27616	6.79618	6.57782	6.18915	6.65766	6.33151	6.48366	6.56068	6.69483	6.52151	6.36676	6.45181	6.3684	6.11506	6.72576	6.23032	6.11351	6.67863	6.47056	7.14874	6.22862	6.33054	6.7944	6.53235	6.80692	6.59761	6.87199	6.60125	6.36801	6.59934	5.61607	6.18606	6.54905	6.60282	6.49708	6.30018	6.0307
ZNF570	5.02328	5.10805	4.17373	4.30596	4.88655	4.05683	4.88587	4.98977	5.14296	5.34597	5.5946	4.95945	4.93954	4.99755	4.53026	5.17166	4.47861	4.56482	4.70235	4.34341	4.91892	4.65068	4.94377	4.58179	4.04796	4.83017	4.70526	4.5131	4.33118	4.88343	4.78833	5.59683	5.31195	4.88093	4.49038	4.75252	4.59688	4.78833	5.39348	4.7698	4.57589	5.37238	4.57134	4.53856	4.31209	4.58034	4.75377	4.07747	4.29116
ZNF57	6.57448	6.02914	6.13766	6.10462	6.67621	6.39177	6.32533	7.32406	6.14397	5.64223	6.331	5.53613	5.3697	6.10317	6.56541	6.30806	6.09416	6.09416	6.33244	6.55403	6.40615	6.07118	6.2982	6.10462	5.50697	6.43333	6.3095	6.03723	5.91151	6.22603	6.2285	5.81465	6.3612	6.14534	6.71195	6.52714	5.95858	6.45069	6.38886	6.14688	6.61996	6.66823	5.69876	6.32267	6.01252	5.40626	6.25828	6.03447	6.03937
ZNF568	5.15683	5.6137	5.32666	5.46253	5.45991	5.54362	4.85067	4.88011	5.73124	5.50097	5.01842	5.96077	5.94613	5.60043	5.37883	4.91639	5.96274	5.46581	5.53299	5.26101	5.3259	4.77205	5.32267	5.38445	5.35435	5.13965	6.03483	5.96814	4.97878	5.95099	4.84354	5.91915	5.73889	5.14156	5.60916	5.12371	5.60364	4.77419	5.12562	5.73394	5.6888	5.79534	5.03802	4.93861	4.85677	5.82956	5.31194	5.63201	4.68846
ZNF567	7.14833	7.31583	6.85573	7.22864	7.47824	7.27452	7.01856	7.60218	7.45607	7.17622	7.00557	7.39744	6.62711	7.28585	7.34069	6.85141	7.36948	7.37176	7.61184	7.44542	7.21868	7.19766	7.05849	7.36878	6.9985	6.5887	7.25412	6.98005	6.73924	7.26038	6.99318	7.48347	8.04328	7.28167	7.36325	7.3482	7.26754	7.06615	7.41741	7.06019	6.97344	7.34872	5.85509	7.19983	7.23898	7.12724	6.74848	6.95847	6.11402
ZNF566	4.7388	5.507	5.4733	6.01852	5.02748	5.01807	4.88392	5.58509	5.52602	4.70707	5.07727	5.33264	4.91105	5.80293	5.02235	5.29228	4.32667	5.689	4.87879	4.17376	4.72707	4.73316	5.17755	5.43583	4.61254	4.29658	3.83606	5.02235	5.11525	5.60505	4.99676	5.48479	5.16803	5.23963	5.24965	4.32237	5.71558	5.27964	4.77339	5.45134	5.01509	5.88262	3.30524	4.55617	5.17622	4.99974	5.02428	3.92324	5.01366
ZNF565	7.16111	7.33107	7.2366	7.12286	7.51904	7.25807	7.24057	7.99484	7.37606	7.19535	7.30202	7.16468	7.05293	7.23523	7.23401	7.09883	7.0515	7.27908	7.22627	7.09641	7.47087	6.86386	7.06853	7.44986	7.0434	7.37245	7.36381	7.13068	7.17256	7.44443	7.41555	7.54349	7.61688	7.13254	7.53153	7.08696	7.24821	7.35869	7.50253	7.19831	7.21144	7.40197	7.1251	7.07868	7.31889	6.95735	7.14115	7.09416	7.02419
ZNF564	8.21161	7.92071	8.1577	8.22995	7.71743	7.95945	8.41839	7.76648	8.47099	7.80429	8.48944	7.89279	7.85408	8.43587	8.2122	6.72806	8.36984	8.31819	7.90359	8.72637	8.43477	7.42705	8.46825	7.21949	8.17748	8.54672	8.72822	8.06355	8.16076	8.57718	8.38685	7.86991	7.35004	7.94126	8.3442	8.31092	8.32061	8.57774	8.42021	8.30753	8.32061	8.27081	8.396	7.87609	8.631	7.93174	8.56026	7.92099	8.43883
ZNF562	8.03036	8.74318	9.21207	8.65411	9.13141	8.85702	9.37902	9.30506	8.71808	8.96876	8.89773	8.87804	8.82701	8.97934	8.82494	8.73456	8.8573	9.04552	8.58811	8.86341	8.63882	8.17304	8.74443	9.06272	8.69303	8.99722	8.52455	9.0418	9.021	9.03721	8.7284	8.77615	9.10945	8.94275	9.28353	8.64305	8.76641	8.61851	9.09163	9.12655	8.45533	8.89042	9.1944	8.84707	9.09863	8.78811	8.9315	8.64142	9.06012
ZNF561	7.13799	6.73085	6.80889	6.95246	6.31035	6.8019	7.0135	6.86995	7.00176	6.57483	6.79058	6.63187	6.82844	6.78438	6.75126	6.12859	6.91909	6.9232	6.53517	7.29652	6.89597	6.99333	6.91389	6.47361	6.758	6.57335	6.80962	6.58909	6.58731	6.56077	6.76611	6.89597	6.33281	6.77977	6.73951	6.57004	6.88937	6.85146	6.81753	6.69695	6.68397	7.14249	6.40783	6.53772	6.58629	6.73525	6.61934	6.70033	6.46109
ZNF559	8.83329	9.17575	8.69049	8.99139	8.52735	8.39512	8.67078	8.1201	8.74064	8.92644	8.64208	8.79028	8.49795	8.88842	9.00876	7.744	8.66528	8.94992	7.9197	8.74775	8.57949	7.91121	8.69729	8.56302	8.97687	8.61248	8.60359	8.80659	8.4797	9.09962	9.01753	9.30758	8.76819	8.74442	8.82867	8.84979	9.08563	8.42906	8.669	8.94869	8.92681	9.15481	7.6655	7.9905	8.72229	8.84129	8.78748	8.62725	8.54193
ZNF558	8.57913	8.7331	8.59563	8.74182	8.39189	8.75678	8.40677	8.53441	8.75115	8.36548	8.37396	8.59967	8.30267	8.35147	8.48447	7.83892	8.27995	8.30643	8.56851	8.45594	8.77475	8.75887	8.72597	8.26619	8.31297	8.14966	8.55485	8.22483	8.16807	8.47194	8.6185	9.00122	8.54166	8.4044	8.51418	8.6185	8.4925	8.50917	8.57852	8.28199	8.58352	8.62972	7.79024	7.84605	8.41935	8.49894	8.3047	8.15494	8.36987
ZNF557	8.65943	9.30277	8.9068	8.86096	9.08053	8.80558	8.97548	8.85222	9.04378	8.77497	8.4918	8.99361	8.09456	9.05225	9.04436	7.90182	8.6589	9.51392	9.19222	9.12046	8.50455	8.87205	8.59406	8.90016	9.22422	9.36467	8.55104	9.54154	9.163	8.56093	8.92395	8.71372	9.24638	8.55385	9.62324	8.84948	9.13689	9.15437	8.88045	8.9739	8.90709	9.09488	8.98092	8.34964	8.97623	9.1781	8.79165	9.06092	9.06969
ZNF555	6.44108	6.36884	6.81251	6.49501	6.00697	6.5376	6.58712	6.20814	6.88364	6.34357	6.9076	6.28794	5.65811	6.90412	6.49236	5.54528	6.66398	6.40991	6.85593	6.3421	6.59253	6.08906	6.70808	6.60674	6.17288	6.41661	6.63852	6.52211	6.60171	6.39966	6.22406	6.00697	6.33883	6.32887	6.25266	6.19651	6.5572	6.6806	6.63143	6.38836	6.40196	6.88549	6.12459	5.77545	6.25841	5.94257	6.47927	6.28614	6.15289
ZNF552	4.79097	4.28784	5.38936	4.44464	4.66739	5.31289	5.15692	4.21543	4.94313	4.54356	5.33948	4.77004	5.17864	5.69753	5.02926	4.51623	5.05775	5.28212	5.24075	5.01691	4.91535	4.50686	5.15795	4.56714	4.81305	5.69753	5.07597	5.33587	4.94362	4.8366	5.1076	4.87086	4.15506	5.03422	4.67358	4.62981	4.89827	5.15439	4.98175	5.07597	5.21558	5.3413	5.37699	5.94196	4.95432	4.465	5.65102	5.00933	5.55835
ZNF551	5.16292	5.84574	5.84741	5.60549	6.14666	5.71454	6.15366	6.80295	6.0406	5.70897	6.26174	5.4246	5.82372	5.7508	5.728	5.65336	6.48401	5.8892	5.91451	6.74811	6.06635	4.45444	5.76575	6.32536	5.84619	6.18801	5.91821	6.04575	6.34364	6.12471	5.76414	5.82925	6.52728	5.32452	6.643	6.3126	5.70182	6.03297	6.05497	6.17546	6.08852	5.76914	6.65564	6.2427	6.10407	5.27315	6.08043	5.49571	6.07319
ZNF549	9.38888	9.85349	10.1347	9.82845	10.0952	9.74711	10.0738	10.2538	10.1725	10.4853	10.2823	10.1481	10.115	9.82668	10.0565	9.54376	10.3817	10.1965	10.4612	9.92353	10.247	9.02662	10.0716	9.93663	9.67041	10.4028	9.98702	9.46712	10.0791	10.0517	9.77134	10.1255	10.1408	9.79849	10.8961	9.82228	10.2761	9.98425	10.2171	10.0474	9.8023	9.59158	10.157	9.17335	10.2449	10.113	10.2225	9.67041	10.2274
ZNF544	8.97871	8.53763	8.4201	8.33774	8.14845	8.3368	8.09736	8.37689	8.27797	7.94944	8.4652	8.39834	8.18826	8.1773	8.40774	8.41276	8.63356	8.5592	8.53047	8.47732	8.66868	8.43187	8.13406	8.17285	8.40077	8.14026	8.21906	8.02283	8.46687	8.9895	8.31398	8.60059	8.8406	8.38187	8.41184	7.93742	8.53604	8.3405	8.12771	8.56551	8.34235	8.48555	8.51706	8.60932	8.4553	8.84213	8.2776	8.36172	8.02235
ZNF543	7.21053	6.90522	6.70303	7.11502	6.91341	6.90655	6.53647	6.88857	7.14376	6.71401	6.57772	7.51999	6.61196	6.84626	7.48126	6.99357	7.14697	6.91561	7.2346	6.07565	6.59374	6.37421	6.64322	7.04903	6.79238	6.77511	6.60791	7.04299	7.11103	7.18654	6.95274	7.10946	7.20818	6.7314	7.21815	6.98959	7.05421	6.66852	6.57689	6.98162	7.32134	7.33542	6.88388	6.26872	6.84146	7.28635	6.71547	6.61521	6.93207
ZNF542	5.25713	5.42673	4.90678	5.43608	5.4689	5.31838	4.85853	5.72323	4.94235	4.81169	5.54805	5.07219	5.22289	5.29707	5.18222	5.70303	5.01702	5.17822	4.94867	4.50776	5.09198	4.83417	5.12998	5.49979	4.84804	4.94942	5.01591	4.54701	4.92963	5.56283	4.71081	5.29904	5.6721	5.00881	5.34668	5.07987	4.92012	4.71007	4.75007	5.37294	4.81716	5.27674	4.45395	5.44482	5.04405	5.32088	4.75924	4.47365	4.62256
ZNF540	7.15568	5.56276	6.97818	6.45852	6.67534	5.34744	6.38243	6.09109	6.79533	6.47217	5.8932	6.05534	5.81029	6.53871	6.35442	4.53028	6.99305	6.01128	6.54372	6.4181	7.39755	4.88545	6.39195	5.40763	6.26801	6.85759	7.1011	5.92382	6.40634	6.92874	6.63164	6.09405	5.22362	6.40542	6.88322	6.4307	6.84895	6.48628	7.04459	6.70706	6.34882	5.99512	4.85423	5.15421	7.18386	5.8932	6.86703	6.01851	6.70091
ZNF536	3.72506	2.89593	2.73666	4.07645	2.61399	4.47502	2.8878	2.94699	3.15575	3.13838	2.79289	3.12712	3.96186	3.05407	4.86421	4.49996	4.1507	4.78445	5.10798	3.19589	3.28297	2.93938	4.05124	4.354	4.15849	4.21359	2.77478	2.76823	2.76096	4.8424	3.10547	3.09565	5.34598	2.78206	3.0449	2.89376	2.83184	3.13548	2.79827	5.50683	5.23917	3.61551	3.04248	3.90003	5.58305	2.78772	2.93396	2.81971	3.14075
ZNF532	8.30304	8.66111	8.13103	8.83214	8.05913	9.11398	8.10703	8.49509	8.47804	8.31961	8.17518	8.53218	8.40075	8.53528	8.48952	9.11183	8.41458	8.53147	8.46414	8.47125	8.74437	8.7634	8.62214	8.49422	8.49834	7.98296	8.5189	8.40433	8.43674	8.74837	8.23214	8.70298	8.66283	8.45308	8.44268	8.57786	8.34889	8.12039	7.95701	8.56732	8.59086	8.63694	7.76165	8.09955	8.35733	8.73256	8.0354	8.28291	8.44767
ZNF529	8.51883	8.70769	8.50663	8.62312	9.39987	8.6198	8.29525	9.42205	8.56087	9.11359	8.38257	8.7229	8.36433	8.68948	8.61455	8.38611	8.90319	8.8825	8.68167	8.67871	8.78007	8.3679	8.28898	9.48094	8.94605	8.38879	8.53723	8.7492	8.87974	8.78935	8.40472	8.99807	9.98464	8.54233	9.03679	8.9255	8.95909	8.6496	8.60676	8.49783	8.20505	8.8058	7.68764	8.75019	8.70292	8.39054	8.5503	8.95045	8.69403
ZNF528	4.00927	4.7355	5.60532	5.46684	5.2544	5.60702	4.8762	4.98239	4.92704	5.0877	5.09336	5.46684	5.09096	5.56716	5.3193	4.08312	5.91474	5.38849	5.296	5.68268	5.5271	4.31667	5.20073	5.71042	5.51405	5.59735	5.62728	5.83034	5.67393	5.58335	5.54064	5.13713	5.32986	4.79716	5.80338	5.0629	5.87488	4.5242	5.11242	4.81468	4.90225	5.50424	4.10809	4.01185	5.18821	5.20235	5.36041	5.54384	5.18221
ZNF527	5.1599	5.51507	4.97527	5.22918	5.06705	5.40964	5.21684	5.88808	5.1662	5.16708	5.12543	5.35235	4.82273	5.33625	5.30549	4.78267	5.63635	5.79735	5.48673	5.12752	5.61256	5.07577	5.15213	5.18877	5.20399	5.42643	5.44883	5.083	5.34713	5.67512	5.18214	5.74215	5.29634	5.36036	5.76232	4.71568	5.3463	5.18362	5.05928	5.69065	5.2283	5.25173	4.6597	4.11375	5.44724	5.20022	5.27052	4.9146	5.30792
ZNF525	9.82596	10.1521	10.3346	10.2044	10.1487	10.1238	10.2961	9.88565	10.2333	10.217	10.0378	9.96013	9.94615	10.1748	9.85324	9.95103	10.5344	9.85324	9.78529	10.2859	9.90754	10.1941	10.1587	9.72306	10.2585	10.1622	9.90024	9.9223	10.1434	9.93018	10.217	10.3824	9.47906	9.95397	10.1912	10.2898	10.0721	10.2439	10.4143	10.2014	9.89704	10.3068	10.3242	10.0934	10.0412	10.1208	10.1456	9.97598	9.87984
ZNF524	9.85262	9.64055	10.1446	9.63884	9.36005	9.57429	10.0021	9.22994	10.0924	9.41254	9.69176	10.1176	9.62505	9.81906	9.60973	9.26815	10.2907	9.50982	10.0787	9.78215	10.0787	9.73057	9.71355	9.33011	9.43558	10.227	9.885	10.0713	10.1198	9.81979	9.95418	9.82605	9.11657	9.20616	9.77103	9.51496	9.79592	10.1537	9.93114	9.986	9.61718	9.68864	10.1888	9.06656	9.88889	9.59671	10.3182	9.65709	10.1036
ZNF521	7.83311	9.00258	8.23139	8.12932	6.82569	8.88485	7.75267	6.37521	8.53164	8.08873	7.31857	7.96803	8.55075	8.03204	7.84505	7.43872	9.14234	8.10334	8.50389	7.73915	7.93318	8.5521	8.52882	7.46446	8.63728	7.67835	7.70038	8.18489	8.1773	8.55426	7.54411	9.47924	7.22183	6.52566	8.42866	8.10677	7.91838	7.59552	7.32374	8.90057	8.53821	7.95656	7.7944	6.75432	8.27037	7.72043	7.7767	8.39035	8.17787
ZNF519	4.45763	5.30816	4.93219	4.55358	4.19525	4.22988	5.26852	3.06746	4.88439	4.96122	4.99643	5.92074	4.38909	5.56271	4.93579	4.34985	5.47741	5.06233	5.76057	5.43634	5.24891	4.93339	5.07164	5.06013	5.33906	4.09094	5.71722	4.52052	4.95589	5.35626	4.87564	6.74889	5.16937	5.00423	5.18175	5.09937	5.42708	4.72026	4.96679	5.20936	5.30221	5.37274	3.92502	3.10069	4.89495	5.52702	4.63643	5.54096	4.96391
ZNF518B	9.3816	9.16554	8.79322	8.96434	9.04584	9.01909	9.20691	9.30569	9.29347	8.8983	8.44394	9.00691	8.75859	9.02298	8.9684	8.87381	8.96715	9.30619	9.04723	8.39919	9.27894	8.62069	9.03277	8.85098	8.89206	9.02356	8.7492	8.53865	9.01805	9.07782	8.67709	9.20659	8.88013	9.05638	9.04607	8.37229	8.70786	8.64754	8.61118	9.25727	8.82668	8.76946	8.32398	8.73586	8.82547	9.05638	8.82668	8.77092	8.24504
ZNF518A	7.75101	8.41221	8.10042	7.60051	7.94953	7.58363	8.05941	7.19521	7.62755	8.0734	7.33137	8.14995	7.91777	8.3505	7.62191	7.34553	7.72248	8.01665	8.22732	7.3827	7.2341	7.50681	7.80803	7.72082	7.76185	7.59517	7.17649	8.41676	8.04751	7.68481	7.75804	7.72335	7.8005	7.39081	8.09128	7.49395	8.12738	7.29969	7.68645	7.61357	7.70575	7.69808	7.11151	6.78096	8.02651	8.0854	7.81299	7.57503	7.8772
ZNF517	4.92624	3.06564	4.04084	4.36441	4.20574	5.25161	5.00128	3.87639	5.57519	4.35318	4.91266	5.07036	5.36521	3.88114	4.70628	4.59223	4.06216	4.94347	5.35903	5.1968	4.22587	3.15497	3.90932	3.99916	3.07708	5.24568	4.21416	4.25882	4.76126	4.83564	3.96583	4.39695	3.97208	3.96583	5.13691	3.57984	4.47516	5.46016	5.7561	5.42913	4.03848	4.62382	4.80782	4.59223	4.62656	3.10455	4.04084	4.45192	5.98739
ZNF514	5.35866	6.87115	6.97759	7.25104	6.32053	7.08702	7.13807	6.64008	6.14937	6.65751	6.99074	6.41501	6.2888	7.42289	6.76702	6.71581	7.64927	6.92918	6.56527	7.46913	7.61684	6.31485	7.30661	6.92811	6.80718	7.34485	7.13623	6.74927	6.384	7.36422	7.13494	7.51384	7.0242	6.30417	8.2486	7.19651	7.29555	7.25979	6.92246	7.04125	6.9849	7.42788	6.16412	6.65322	7.06499	6.67637	7.82243	5.99147	7.0168
ZNF513	8.40092	8.32877	8.31405	8.56572	8.8461	8.85036	8.60635	9.11554	8.83926	8.44897	8.54592	8.3522	8.8282	8.48512	8.57994	8.6617	8.52037	8.41276	8.47666	8.99244	8.62818	8.66701	8.71753	8.90299	8.42215	8.43702	8.48438	8.64683	8.50316	8.74879	8.45524	8.2239	8.83209	8.51115	8.54164	8.70599	8.4967	8.98727	8.78635	8.47322	8.5985	8.22669	8.94926	9.14932	8.71053	8.25629	8.45742	8.40092	8.57651
ZNF512B	8.1784	8.46327	8.0186	8.53703	8.26893	8.35191	8.0003	8.09157	8.25368	8.03088	7.95307	8.11941	8.26542	8.0224	8.20582	7.735	7.92434	8.22757	8.27761	8.35492	8.2715	8.29492	7.9447	8.22595	8.1344	8.23489	8.03272	8.44064	8.41827	8.32533	8.05978	8.55454	8.52373	8.03088	8.36794	8.55672	8.24595	7.94902	7.98439	8.4498	8.38489	8.31869	8.29854	8.13673	8.09871	8.06728	8.12811	8.19643	8.36997
ZNF512	9.56574	9.31036	9.80959	9.51497	9.23099	9.08965	9.48721	9.73576	9.51749	9.67065	9.36312	9.38195	8.77414	9.2893	9.63376	9.07564	9.41877	9.48117	9.16134	9.22962	10.0327	8.8303	9.57815	9.03634	9.61064	9.77627	9.87414	9.25933	9.42436	9.81209	9.69345	9.47685	9.14017	9.3814	9.59735	9.35396	9.58039	9.53775	9.38364	9.69079	9.84314	9.33466	9.41509	8.53593	9.35282	9.19422	9.67832	9.26435	9.68198
ZNF511	9.84217	9.84305	9.88374	9.87085	9.95866	9.95015	10.0769	9.89363	10.2646	9.77466	9.94908	9.83512	10.0497	9.81083	9.98562	9.57003	10.2122	9.54403	10.1923	10.0564	10.0278	9.83615	9.73119	9.79271	9.86135	10.2164	9.99004	9.8625	9.96904	10.0389	9.80105	9.79638	9.59797	9.67925	10.2707	10.0264	9.71651	10.0236	10.0785	10.0172	10.0131	9.80802	10.407	9.92992	10.1182	9.80029	10.0409	9.87547	9.99129
ZNF510	3.44042	3.71979	3.78087	3.68649	3.138	3.57125	3.59145	3.25604	4.08315	3.60474	3.36609	4.44333	3.3918	3.47715	3.23831	3.645	3.49444	4.11591	3.371	3.07767	3.80023	3.32827	3.52135	3.6221	3.22975	3.84813	3.07017	3.19532	3.86987	3.93879	4.53593	3.72269	3.21873	3.25425	4.2785	3.28669	4.35315	3.68896	3.26045	3.64367	3.17597	3.44491	3.44279	3.29423	3.89806	4.09808	3.35039	3.52839	3.62468
ZNF502	7.77981	7.78657	7.91803	8.17087	7.9547	7.9809	7.87055	8.28962	7.87116	7.55571	7.6271	7.48378	6.93841	7.87465	7.72261	6.46404	8.01526	7.72622	8.19531	8.00888	8.25508	6.92761	7.65284	7.67956	7.47153	7.96298	7.98651	7.67782	7.93904	7.85054	8.09192	8.21497	7.4686	7.91975	8.50107	8.11265	7.65874	7.61047	8.04701	7.96655	8.16693	8.03504	7.64178	6.87495	7.97962	7.57304	7.18247	7.4616	7.53965
ZNF501	3.13414	3.96734	3.20329	3.61664	2.77924	3.17044	2.64623	2.79473	3.44257	3.32471	3.60115	3.62888	2.09579	3.99795	2.962	2.20388	4.70009	2.88887	5.50477	3.5919	4.61279	4.71647	3.76224	2.26318	2.22043	1.98962	7.37315	4.96062	4.10812	3.34309	3.9855	3.80337	6.74353	2.89171	3.86546	3.55232	2.90234	2.20794	3.66205	2.45401	3.71802	3.12833	3.61138	1.89454	3.06352	3.91439	1.86729	5.37695	4.27745
ZNF500	8.66833	8.31086	8.61236	8.44032	8.12539	8.21348	8.34905	8.27733	8.70019	8.35797	8.39688	8.19476	8.15989	8.59786	8.69306	7.12971	8.7767	8.44742	8.74959	8.67407	8.61146	8.12141	8.37465	8.10869	8.77553	9.02609	8.84164	8.64545	8.62304	8.80806	8.28093	8.25959	8.06259	8.04029	8.76087	8.49258	8.31786	8.47049	8.50073	8.62736	8.62092	8.13994	8.96432	7.8941	8.47936	7.8579	8.69409	8.51218	8.80966
ZNF498	5.99392	6.47794	5.85531	6.33513	6.49068	5.381	5.77374	6.50488	6.44319	5.96871	6.48124	6.14299	6.27819	6.14112	6.41918	5.76651	6.1392	6.05668	6.19783	6.26052	6.11549	5.38527	5.93133	6.3903	5.89374	5.97547	6.3682	6.18461	6.23887	6.72652	5.84449	6.5747	6.33588	6.05292	6.74463	6.9429	6.20112	5.91004	6.24055	6.34731	6.3568	6.28157	6.53155	6.16464	6.73657	6.47398	6.14112	6.19864	6.38079
ZNF496	4.55397	4.74488	4.52191	4.54805	5.24652	5.08021	4.94766	5.6364	4.96627	4.76535	4.80522	4.5821	4.5715	4.6649	4.77451	5.32468	5.3686	4.71774	5.15235	4.60178	4.89144	4.68788	4.907	5.02066	4.56381	5.06281	5.126	4.87037	4.85271	5.2182	4.9215	5.27834	5.43179	4.34105	5.12231	4.62981	4.57341	5.1455	4.77211	4.84362	4.97864	4.9949	5.66845	4.52668	4.89257	5.1181	4.90296	4.9215	5.0956
ZNF493	5.9338	7.67353	6.74246	7.16474	6.10014	8.05826	7.44713	7.26228	5.29201	7.70749	5.75634	7.77107	5.09407	7.41433	6.64695	6.58739	6.60665	5.8614	7.96236	7.6679	8.01361	7.05726	6.0618	6.99746	7.56148	7.43824	7.49722	8.14432	6.92212	7.46992	6.40073	6.86749	5.17224	6.81084	7.32695	7.83687	5.81088	7.65353	7.70749	6.61929	5.63771	5.67882	6.40362	6.57413	6.9073	5.8433	6.57542	7.74638	7.64016
ZNF491	5.33364	5.16078	4.77328	5.12471	4.42014	5.09633	5.21962	3.45792	5.40075	4.9752	5.66928	5.70436	4.94009	5.4869	5.79593	4.47851	5.53675	4.98977	5.33526	5.4869	5.81802	4.61523	5.26286	4.97735	4.79471	5.21962	4.36124	5.25975	5.34508	5.66454	5.40444	5.16254	4.61523	4.47091	5.78622	6.32895	5.45198	5.31008	5.58977	5.08961	5.44376	5.48765	5.21594	4.43611	5.5635	4.41745	5.74395	4.66479	5.53277
ZNF490	6.32709	6.1187	6.51986	6.79858	5.89336	6.30269	6.56451	5.96022	6.62958	5.73129	6.40131	6.35531	6.3061	6.39174	6.53176	4.94889	6.26368	6.29619	5.99929	6.1187	7.06995	6.16924	6.59814	5.85231	6.16806	7.14076	6.55849	6.43177	6.27609	6.52264	6.37159	6.74182	5.83832	6.21942	6.50034	5.96022	6.70333	6.36032	6.13399	6.28046	6.73495	6.89567	6.95666	5.45198	6.24277	6.44452	6.10762	6.27426	6.39538
ZNF486	9.38748	9.19398	9.60085	8.86374	9.07812	9.14996	9.86874	8.48172	9.14721	8.80584	9.20613	9.61127	9.33049	9.82178	9.3013	8.89741	9.75054	9.34941	9.59407	9.28648	9.28648	8.58017	9.53512	8.93455	9.55491	9.58119	9.35077	9.33616	9.50112	9.98886	9.5537	9.35837	9.29536	9.28894	9.71693	9.11458	9.92675	9.26874	9.16492	9.87041	8.70018	9.19175	8.61131	9.27894	9.69732	9.35837	9.52477	9.01652	9.47872
ZNF485	4.72207	5.55548	5.65778	5.74269	6.02923	5.45927	5.94184	6.91117	5.89791	5.06593	6.02088	5.30432	5.69452	5.92102	5.55548	4.43902	5.7993	5.28111	5.52044	5.87565	5.65273	5.56906	6.15818	6.03161	5.57736	5.45695	5.4722	5.91582	5.82785	5.36132	5.68968	6.09517	6.14209	4.91179	5.68513	5.5101	5.94184	6.33525	6.04226	5.76528	5.52978	6.15609	5.40316	5.31598	5.37723	5.15871	6.00212	5.26687	5.61925
ZNF484	6.39782	6.40243	6.42235	6.22977	6.58735	6.44898	6.6021	6.71439	6.6105	6.61146	6.75537	6.90753	6.33865	6.84995	6.32127	6.32229	6.46496	6.63246	6.71933	6.30898	6.41417	6.44812	6.56595	6.49498	6.25877	6.19257	6.32468	6.41375	6.72102	6.59651	6.09439	6.50009	6.82223	6.58257	6.59893	6.59972	6.57216	6.48351	7.0195	6.68611	5.86256	6.7168	5.71665	6.17696	6.42732	6.57021	6.36971	6.44812	6.23336
ZNF48	5.97871	6.22676	6.26043	5.95757	6.49067	6.56459	6.50538	6.4877	6.49868	5.99918	6.09122	6.50858	6.20817	6.164	6.19677	5.19357	6.73764	6.49234	6.59349	6.56459	6.62888	6.14265	6.31484	7.09969	6.24618	6.94445	6.85109	6.71499	6.86578	6.28866	6.31071	5.85666	7.49267	6.25597	6.70737	6.02122	6.46207	6.92327	6.98913	6.56575	6.23404	6.52237	6.82405	6.29453	6.13855	6.15419	6.31627	7.16895	6.47342
ZNF479	2.71155	1.54906	3.86484	1.60693	3.27947	4.35746	4.68227	1.71061	3.13759	2.295	2.54964	4.61339	3.3284	4.3071	2.59462	1.91658	4.53228	4.04297	4.19449	3.71689	3.38076	1.73918	4.62245	4.79423	3.26444	3.54337	4.15364	4.4019	4.19237	3.94818	3.13759	4.83085	5.01579	3.06278	4.45113	3.627	4.49171	3.73728	4.01764	4.77448	1.43657	4.027	1.90072	3.08451	3.25773	3.80524	3.32698	3.65061	2.87221
ZNF473	7.3909	6.56002	6.6795	7.08949	7.47753	6.55537	6.90302	8.85956	7.02331	7.05219	7.13466	6.82612	6.52484	6.8132	7.11442	6.76537	6.97845	6.81876	6.50843	7.26706	6.82612	6.5794	6.82358	7.23252	6.11035	7.56736	6.50136	7.02206	6.65762	6.9373	6.63586	7.30521	7.28546	7.8699	7.24659	6.84792	6.9851	7.17934	7.12364	7.01155	7.49776	7.02616	7.48078	7.39349	6.77569	6.26586	7.05674	6.38837	6.89367
ZNF471	6.63775	6.63362	6.56606	6.32367	6.23399	6.07857	5.88286	6.23002	6.11565	6.60515	5.98243	6.30969	5.53285	6.28713	6.18226	5.12312	6.0511	6.66849	6.45757	5.70977	6.7171	3.49469	6.05723	5.65934	6.28157	6.24226	5.7132	5.72044	6.16527	6.94959	6.15322	6.88037	6.47607	6.54924	7.26296	6.27599	6.84118	5.33245	6.04938	6.61027	6.14989	6.45581	4.36223	4.75062	6.61158	6.34025	6.31092	5.39437	6.90031
ZNF469	7.0203	7.6636	6.45958	7.99553	6.72005	9.56599	6.77301	7.19622	7.27099	7.21906	6.34394	6.24239	9.06684	6.73222	6.81325	6.43611	7.64452	7.11284	6.97607	7.40351	6.5707	8.51645	7.52629	7.62694	7.58007	6.83033	6.50657	7.35956	7.49762	7.20342	6.71314	8.3956	7.39408	6.44078	6.8287	6.7349	6.84344	8.03637	6.91119	6.89686	7.50617	7.10109	7.9432	8.01233	6.81907	6.91349	6.80407	7.30418	6.56222
ZNF468	5.90368	5.88435	5.77248	5.72929	5.56182	5.18651	6.30557	5.19322	5.67677	5.19256	6.01061	5.93579	4.87077	6.11258	3.59839	5.59382	5.49804	5.86453	6.40533	5.96035	6.01061	5.12716	5.7018	5.80863	5.74257	5.59517	5.38188	5.8036	5.79984	6.16834	6.1043	6.25092	6.10305	5.55127	5.96385	5.48735	6.18889	5.76264	5.75857	5.38933	5.33861	5.90984	3.29624	5.17936	5.33861	5.16861	6.33504	5.64927	4.97152
ZNF467	6.53547	6.2923	6.85319	6.92506	7.22696	6.9311	7.10381	7.03852	7.04284	7.11007	6.50752	7.06928	7.01521	6.61692	6.29342	6.60325	7.72223	6.62192	7.50509	6.2118	7.3786	7.73991	6.98051	6.83013	6.2998	7.25331	9.34888	8.20243	7.0116	6.74368	7.14388	7.01039	9.20928	6.42821	7.69665	6.42432	6.70999	7.66126	6.7246	7.65273	6.24	6.56611	7.26428	6.6155	6.35803	7.20076	6.88255	8.51817	7.38809
ZNF462	10.5665	10.92	10.8163	10.3451	9.93397	10.4274	10.1964	10.0762	10.55	10.3103	9.89305	10.756	10.3576	10.2074	10.5196	9.87758	10.3641	10.6678	10.6778	10.5265	10.7924	10.1193	10.3743	10.0624	10.6995	10.8354	10.4298	10.5196	10.5078	10.5769	10.5649	10.8472	10.3465	10.2547	10.7804	10.8288	10.5212	10.0464	9.95773	10.569	10.7915	10.1795	9.9905	9.66246	10.8728	9.56931	10.6789	10.4693	10.7379
ZNF461	4.83474	5.53649	4.65699	5.31694	5.46472	4.96522	4.93846	5.28689	5.00144	4.93288	5.3747	5.25051	5.28265	5.3916	5.14281	5.22303	5.29493	5.28856	4.89782	4.9068	4.89603	5.04628	4.92686	5.11648	5.00095	4.91673	5.2679	5.02	5.17785	5.41534	5.14836	5.6826	5.56108	5.33648	5.29592	5.28403	5.51037	5.04068	5.08505	5.17875	5.29049	5.59213	4.12405	4.64852	5.10682	5.55222	5.00639	4.85505	5.27638
ZNF454	5.44316	5.43346	4.28084	5.17702	4.57598	5.33822	4.66266	4.31974	5.38329	4.49099	4.71612	4.45562	4.43796	5.06784	4.97428	3.73898	5.44457	5.39286	5.03688	3.93486	5.48464	4.71612	5.34439	4.58448	4.76544	5.51851	4.57598	5.46697	5.31688	5.12372	4.88723	5.77649	4.91819	4.58099	5.30459	5.14606	4.75052	3.16629	3.90684	5.74553	5.30169	5.1596	4.71418	3.70036	4.91167	4.75052	4.81906	4.39852	5.46312
ZNF451	9.39713	9.47767	9.0567	9.38806	9.17255	8.95856	8.70233	9.19011	9.35228	9.23027	9.26479	9.00314	9.23729	8.9456	9.2146	9.36177	9.06015	9.156	9.12971	8.76032	9.07379	8.71534	8.94777	8.82258	8.84127	8.77664	9.13379	8.94275	8.72392	9.31784	9.32222	9.31964	9.15507	9.52225	9.12971	9.57957	9.27723	8.86178	9.16573	9.12632	8.86202	9.25046	8.14739	9.18537	9.33793	9.2457	8.93419	8.71031	9.03869
ZNF45	4.9991	4.81746	5.11885	5.43012	4.82601	5.10069	5.04062	7.16132	5.13753	5.85405	5.39987	5.17677	4.96107	5.03784	4.81165	5.24766	5.13518	4.82601	4.89232	5.00362	5.81045	4.93701	5.21704	5.19244	4.78124	4.98721	5.27666	6.45929	4.72097	5.0305	5.12173	6.02348	5.16397	5.07651	5.15628	4.87212	5.19244	5.20872	4.95871	5.24027	5.13151	5.02155	5.17168	4.89468	4.7921	4.77331	5.32206	4.73699	5.0786
ZNF449	5.23728	5.81911	5.96325	5.68552	5.68212	5.93511	6.03213	5.28476	5.32665	5.72076	5.61553	5.69903	5.6554	6.16323	5.82113	4.66849	6.189	6.02752	6.22844	5.62953	5.89433	6.01216	5.80282	5.60086	5.59434	5.53111	6.03762	5.74861	5.80319	5.6202	5.84746	6.018	6.21268	5.61807	6.1874	5.62196	5.85036	5.63834	6.17647	5.91522	5.15456	5.88951	4.63749	4.14729	5.80491	5.90317	5.76353	6.1983	5.79516
ZNF443	6.65515	6.85005	6.94048	6.88051	6.23	6.75013	6.86843	6.1565	6.90089	6.15259	7.10378	6.72716	6.19022	6.97679	6.66326	5.83156	6.42034	7.02711	6.82088	6.85129	6.98873	6.25219	7.00818	6.58044	6.40852	6.59743	7.06935	7.99443	7.07053	7.12594	6.90453	6.628	6.81116	6.69902	7.42795	6.50221	6.88425	6.99326	6.66573	7.05814	6.60287	7.01373	6.26912	5.61351	6.82088	6.11575	7.09056	6.03347	6.76783
ZNF442	5.61413	5.84728	6.41441	6.07757	5.56624	5.80784	6.34067	5.53792	6.07367	5.59562	6.62375	6.26591	5.23695	6.63341	6.09375	5.20929	6.42458	6.49702	6.30871	6.06526	6.34171	5.23412	6.22173	5.92399	6.00166	6.076	6.67089	6.49395	6.36108	6.28831	6.3315	6.37219	6.12115	6.20275	6.62375	6.1825	6.60638	6.32757	6.05566	6.54794	6.09808	6.69082	5.61271	4.58345	5.96309	5.95688	6.28002	6.31894	5.85134
ZNF441	4.42155	3.98797	3.71015	4.12707	3.07025	3.86179	4.62295	2.86398	4.54488	3.83029	4.87678	3.78512	2.66665	4.37591	3.69055	2.59048	2.63327	4.17082	4.87579	4.22658	4.63027	2.28744	3.98965	3.63696	3.67721	3.12609	4.7952	4.21578	3.1916	5.31047	4.59113	4.3189	1.93121	4.46151	3.64699	4.68349	4.83989	4.12284	4.42546	4.63707	4.76202	4.28362	3.50828	2.55347	4.69546	3.58541	3.89267	4.01224	3.03448
ZNF439	8.06473	8.38588	8.54823	8.34493	7.52481	8.42592	8.3194	6.818	8.8939	7.7337	7.81757	8.00008	8.02202	8.41826	8.07148	7.22228	8.54947	8.45283	8.24205	7.94721	8.07437	7.84692	8.00339	7.87085	8.15053	7.94631	8.43527	8.39627	7.59055	8.51015	8.06367	7.68184	8.03487	7.97945	8.52349	8.4454	8.60145	8.05914	8.34758	8.49421	8.0571	8.48644	6.09715	7.57397	8.27521	8.37444	8.62774	7.95884	7.56903
ZNF438	9.39923	9.91582	10.0354	9.78647	9.33878	9.42948	9.93795	9.37911	9.72501	9.75948	9.87056	10.0111	9.63561	10.2466	9.73253	9.3305	9.8209	9.88628	9.98976	9.35702	9.73334	9.78888	9.84524	9.60507	9.64883	9.67676	9.85726	9.92874	9.74661	9.85973	9.87984	10.0177	9.56066	9.59167	9.78315	9.49581	9.91682	9.88995	10.0043	10.0037	9.60783	9.6678	9.55839	8.81314	9.69605	9.82775	10.0729	9.85229	9.71233
ZNF436	8.00664	8.01415	7.93361	8.36072	6.97392	8.23502	7.90213	6.97624	7.89759	7.63592	7.7578	7.67306	7.63842	7.92473	7.91879	7.00943	8.4309	7.78631	8.14163	8.12529	7.76984	7.68063	8.4157	7.26475	7.65763	8.27136	7.99519	7.4927	8.03237	7.99335	7.50015	9.35238	7.65808	7.59985	7.75179	7.59411	7.95269	8.04153	8.12949	7.75489	8.17557	7.90824	8.20345	6.91269	7.89025	7.57101	7.78044	7.70792	7.91986
ZNF434	8.78269	8.44808	8.30649	8.67805	8.52768	8.16262	8.29739	8.79966	8.7409	8.34114	8.96381	8.66671	8.40287	8.54767	8.42411	8.05498	8.32294	8.50005	8.13214	8.41488	8.7609	7.96091	8.62486	8.4894	8.32434	8.67005	8.56169	8.51681	8.3307	8.63108	8.4729	8.30862	8.39242	8.57736	8.75805	8.23052	8.51385	8.66702	8.41338	8.27152	8.76203	8.6109	8.46194	8.07778	8.50244	8.14336	8.50005	8.29261	8.51325
ZNF433	7.07428	7.46236	7.40838	7.23799	7.31966	7.6295	7.62436	7.01789	7.33005	7.19213	7.04007	7.73299	6.91275	7.42908	7.36414	6.58867	7.61122	7.14802	7.64378	7.51761	7.8353	7.27684	7.27869	7.45837	7.56021	7.62663	7.91931	7.48891	7.569	7.42417	7.4125	7.10056	7.36853	7.12258	7.60349	7.48151	7.62033	7.41679	7.16222	7.59336	7.26458	7.40403	6.54195	6.28782	7.18103	6.94976	7.35066	7.99304	7.23432
ZNF432	6.62691	6.65159	5.90008	6.25007	6.46566	6.0702	6.24536	6.59543	6.37353	6.08977	6.61967	6.46235	6.05205	6.27312	6.25781	6.27125	6.35628	6.46716	6.0022	6.50761	6.56258	6.10008	5.78185	6.71112	6.25626	5.68293	6.22793	6.18515	6.00945	6.61795	6.53561	6.8924	6.57595	6.1757	6.4235	6.37803	6.47819	6.55479	5.96535	6.38424	6.40495	6.30109	4.27942	6.20734	5.89592	6.20537	6.12423	6.21154	5.40426
ZNF431	4.12322	4.88665	4.09167	4.24718	4.27007	4.13221	4.49467	4.85376	5.4224	6.02805	5.15055	5.31524	4.0985	4.10181	4.11851	5.541	5.89993	5.17337	4.26885	4.16149	4.21419	4.04514	5.11271	4.15627	4.13526	4.15787	4.0084	4.06055	4.54893	4.10815	4.85376	4.14624	4.41605	5.1655	4.11851	4.52404	4.84605	4.13221	4.10815	4.12098	4.14036	4.13426	4.0854	4.10181	4.11392	4.6955	4.10181	4.20572	4.31579
ZNF430	8.81589	9.71012	9.54804	9.58421	9.46235	9.35001	10.2057	9.6151	9.19343	9.92685	10.2293	10.1652	9.37969	10.2416	9.86375	9.51162	9.82839	9.74747	9.77018	9.95685	9.66913	9.20938	10.1159	10.1159	9.8899	9.29833	8.97185	9.78542	9.76785	9.64828	9.67742	10.1325	10.3234	9.3877	10.2454	10.0358	10.163	9.50617	10.1652	9.71156	9.17862	10.4856	8.6672	8.93824	9.51513	9.69202	9.73612	9.55329	9.6271
ZNF429	7.70433	7.71931	7.97868	8.08641	7.36266	7.28642	8.05542	6.91036	7.77085	7.28436	7.65591	7.82316	7.14941	7.86538	8.0027	7.23029	7.60399	8.13954	8.03967	7.72115	7.34775	7.40759	7.83808	7.23971	7.98911	7.01851	7.68191	7.93178	7.49487	7.58316	8.32525	7.95944	7.46078	7.74352	8.0027	7.89275	8.08577	7.15005	7.52807	7.73557	7.56383	8.00155	6.69219	7.2793	7.81452	7.57855	7.43385	7.49108	6.86292
ZNF426	8.03548	8.47079	8.1837	8.43509	8.28642	8.08054	8.27926	8.52049	8.56429	8.60036	8.62654	8.25216	8.27561	8.28762	8.58662	8.11824	8.64113	8.68779	8.34996	8.57573	8.6293	7.65365	8.39714	8.18336	8.39689	8.5419	8.53134	8.10083	8.38492	8.42797	8.2814	8.77451	8.17911	8.26367	8.66293	8.63522	8.33779	8.0603	8.3505	8.46098	8.16279	8.30047	8.57573	7.55474	8.45862	8.25303	8.47849	8.17731	8.43097
ZNF425	6.55876	6.42776	6.19638	6.09483	5.79976	6.089	6.07947	5.83438	6.43148	6.07119	6.23471	6.20893	5.76681	5.95778	6.49478	5.20605	6.31276	6.05349	6.23514	6.40383	6.78304	6.00855	6.44028	5.58549	6.42015	6.30932	6.49184	6.09057	6.31732	6.1079	6.45214	6.50631	4.99895	5.60267	7.05463	6.40672	6.53997	6.11332	6.10713	6.06487	6.41788	5.98015	6.32511	4.58378	6.40744	5.80554	6.43953	6.14157	6.77893
ZNF423	7.2583	7.78646	6.85094	6.61017	7.08023	7.5424	6.87748	7.66202	6.95422	7.02999	6.71444	8.01764	7.75063	7.23176	7.27711	7.95769	8.06385	7.50013	7.94477	6.44551	7.66202	6.67952	7.51211	7.13827	7.36843	7.51829	7.05198	7.00744	7.79584	7.57913	7.02373	8.87959	7.11121	7.25392	6.49548	6.74568	7.50805	6.22092	5.62623	7.88299	7.54695	7.13669	7.1916	6.57336	6.93977	7.81648	7.42476	7.70972	7.58242
ZNF420	5.16844	5.2703	5.23924	5.36136	4.89308	4.43934	4.88867	5.10664	5.83759	5.24557	5.40963	5.47352	4.68631	5.29526	5.38096	4.20283	4.82138	5.65601	5.13458	5.3584	5.6052	3.93698	5.09805	4.55414	4.90028	4.8299	5.84949	5.08915	4.7562	5.97562	4.87257	5.26366	4.76258	5.30342	5.42783	4.46175	5.29734	4.92245	5.61248	5.44141	5.50758	5.14917	3.96181	5.03669	5.05236	5.71868	5.16338	4.02888	4.84979
ZNF419	7.31703	7.95767	7.50893	7.61561	7.9371	7.76461	7.39489	7.46198	7.96705	7.20223	8.06765	7.43759	7.67685	7.99863	7.39101	6.07065	7.42134	7.92379	7.59624	8.17082	8.25709	6.41306	7.62796	7.12918	7.46084	8.43176	8.37739	7.24863	7.43437	7.75294	7.61883	7.45862	8.04975	7.58676	7.87346	7.88951	8.05884	8.19368	7.98229	7.82926	7.66978	7.99564	7.78098	6.66484	7.79252	7.70304	7.76937	7.03906	7.77563
ZNF418	6.30588	6.30064	6.21085	6.17651	6.48639	6.29727	6.43579	6.19802	6.46584	6.10501	5.01826	6.40545	6.26384	6.3354	5.98067	6.25011	7.01834	6.36783	6.50144	5.87295	6.2986	6.53439	6.15655	6.18095	6.52126	6.41127	6.17753	6.54627	6.51146	6.57517	5.94824	6.83969	6.64142	6.10741	6.29172	5.95368	6.36	6.52988	6.31104	6.46071	5.95978	6.30658	6.53195	6.47519	6.41758	6.77599	6.42093	6.67313	6.72136
ZNF416	7.32627	7.01751	7.12757	7.21276	7.07083	7.24608	7.22198	7.40439	7.29161	6.7597	7.4798	7.10751	6.45787	7.20587	7.16309	6.23433	7.76415	7.33364	7.4226	7.65548	7.41778	6.20422	7.2003	7.37419	7.19515	7.8125	7.21158	7.30319	7.60533	7.39472	7.08121	7.14833	7.27265	6.77204	7.87137	6.97177	7.31249	7.56249	7.09764	7.56849	7.57126	7.31703	7.37717	6.50687	7.19622	6.99354	7.48257	7.24305	7.57722
ZNF414	5.20166	4.68098	5.34575	4.83345	5.22319	5.54108	5.60186	5.47626	5.12873	5.18939	5.72841	5.70857	4.91889	5.348	5.31318	4.61205	5.51144	5.27045	5.35314	5.54403	5.78116	4.89744	5.39786	6.13379	5.4953	5.94559	5.71673	5.40715	5.33791	4.93804	5.51369	5.31091	4.86746	4.64658	5.72964	5.65283	5.47399	5.9605	4.81437	5.57071	5.72649	4.73424	5.94312	5.00164	5.32485	5.37683	5.59834	5.3433	5.7076
ZNF410	9.98961	10.3022	10.1133	10.2466	10.684	10.1209	10.0511	10.7094	10.2902	10.7582	10.2887	10.0345	10.3675	10.0895	10.2787	11.0773	10.0106	10.1353	9.85193	10.1908	10.1687	10.1187	10.2162	10.6778	9.89141	10.142	10.2335	9.91656	9.89979	10.269	10.0231	10.1557	10.5354	10.3631	10.2412	10.3357	10.0988	10.255	10.572	10.1822	10.1664	10.3029	10.369	10.521	10.209	10.1817	10.2196	9.93855	10.1915
ZNF41	4.80195	4.95835	4.57102	4.71985	4.64444	4.74379	4.31398	4.93108	4.77567	4.52041	5.2512	4.69917	4.35503	4.63791	4.42066	4.80254	4.0632	4.59975	4.41788	4.11713	4.75574	5.03596	4.80021	4.5129	4.0384	4.08369	5.37403	4.40152	4.34749	4.70248	4.16387	4.38524	4.68617	4.61473	4.96535	4.93948	4.7321	4.64324	4.88228	5.17477	4.69917	5.01596	3.47046	4.11891	4.71074	4.4528	4.53412	4.16962	3.54828
ZNF408	6.03743	5.43709	5.37153	5.84742	5.90037	6.37647	5.88192	6.50161	5.62072	6.01258	6.70466	5.77209	5.22921	5.89903	5.8534	5.78355	6.16722	6.11808	5.73524	6.67491	7.00028	5.98193	6.40829	6.18291	5.79062	6.6564	5.93332	6.12367	6.10068	6.20122	6.13389	5.87454	5.63862	6.38923	6.65305	5.59811	5.95189	6.87719	6.27561	6.09968	6.44891	5.72407	6.98472	5.68904	5.7196	4.52699	6.02866	5.57377	6.35007
ZNF407	8.04096	8.35141	7.95744	8.08895	8.42125	8.0211	8.24214	8.52076	8.31932	8.32104	8.47616	8.29346	8.3596	8.26575	8.26655	8.16852	8.21859	8.39369	8.25893	8.08739	8.4352	8.17522	8.14858	8.22412	8.12616	8.60655	8.3596	8.29705	8.42647	8.47276	8.17068	8.25463	8.39662	8.1073	8.55895	8.54246	8.44095	8.11685	8.22275	8.55482	8.29835	8.43651	8.44486	7.78137	8.36756	8.18439	8.29346	8.17453	8.4955
ZNF404	7.06649	6.91444	6.75198	7.43629	6.02142	6.25032	6.71214	6.38004	6.65893	6.88019	6.36698	6.9244	5.77845	6.17929	7.05181	6.49141	6.8542	6.03372	5.93903	6.18901	7.76504	6.96123	6.64368	4.75859	6.80606	6.25032	7.05111	6.44859	6.22992	5.54938	6.46553	6.83827	6.06799	6.91604	7.07523	5.69736	6.70854	6.20395	6.92558	6.67842	5.70849	6.35022	5.46071	4.63425	7.25265	6.03087	6.82021	6.68959	6.07224
ZNF398	8.73279	8.77945	8.98611	8.67388	8.90394	8.57229	8.70346	9.01548	8.76094	8.48811	8.69128	9.00966	8.25251	8.67512	8.7645	7.84793	8.87081	8.83912	8.79544	8.98611	8.7842	8.5219	8.61651	8.94306	8.67388	9.11266	8.96679	8.91647	8.90324	8.72348	8.82105	8.61564	9.08659	8.69602	9.0009	8.5144	8.86007	8.85779	8.76988	9.01902	8.94275	8.79691	8.66302	8.5448	8.62354	8.6849	8.92274	8.77827	9.01769
ZNF397	7.58522	7.04083	7.60045	7.62171	7.11061	6.5899	7.56976	7.11815	7.73774	7.13852	7.15922	7.33405	6.67741	7.11621	6.96571	6.50836	7.12757	7.91977	7.64422	6.94597	8.05119	6.28525	7.3659	6.56266	7.21942	7.30828	7.8764	7.31211	7.18099	7.55855	7.74548	7.35078	6.83997	7.46739	7.88881	7.17744	7.52643	7.33405	7.31049	7.21509	7.63497	7.62371	6.6829	6.16413	7.24074	7.23837	7.34857	7.07248	7.5692
ZNF395	11.391	11.17	11.0954	11.1167	10.6604	10.3583	10.5989	10.1401	11.2765	10.9941	10.9633	10.8607	10.4569	10.6695	11.0447	10.9639	11.1484	10.6456	10.7726	11.1586	11.2602	10.0532	10.3894	9.89714	11.2405	11.1328	11.6054	10.5675	10.9821	11.0067	10.9977	11.7162	10.5011	11.388	11.0691	11.249	10.9008	10.6133	10.4968	11.1631	11.2982	10.775	10.9904	11.0866	11.1765	10.9114	10.947	10.5259	11.2163
ZNF394	10.9462	11.9678	11.5439	11.5491	12.112	11.2	11.8224	11.9095	11.7515	11.9748	11.6085	11.6817	11.8654	11.4746	11.8637	11.6985	11.775	11.6068	11.5249	11.8694	11.4868	11.1277	11.482	11.5932	11.6278	11.6085	11.6219	11.3658	11.3739	11.5884	11.5997	12.1584	11.7598	11.4847	11.9514	11.6283	11.769	11.6783	11.8809	11.5696	11.6921	11.7205	12.0215	11.7522	11.4952	11.6309	11.6843	11.5313	11.5723
ZNF385D	6.98194	7.19388	5.27228	6.94418	5.95447	7.15714	6.1148	7.41974	6.74674	5.50074	4.86869	4.17461	8.82011	4.26693	6.61155	6.18643	6.47427	3.12705	4.09555	4.50905	3.92995	5.87362	6.5963	6.76402	5.67904	4.30687	5.45276	5.35716	5.4165	5.67904	4.80226	8.32023	6.45741	5.2758	5.79558	6.7587	5.07512	6.45741	6.81193	6.28538	6.13653	5.91232	6.97532	8.44061	6.03363	4.77124	3.74398	5.20885	5.78342
ZNF385B	7.90256	8.94864	9.61358	8.9555	9.62103	8.49854	8.91877	8.48589	8.86129	8.2945	9.24607	8.75889	9.30957	8.83123	9.10586	8.42196	7.89082	8.41224	8.92151	8.13569	8.3166	8.79059	7.57177	8.05184	7.76557	8.4852	9.20942	8.51433	8.22048	7.83216	8.37652	4.98458	8.61731	9.16063	8.21061	9.20635	9.21686	8.49531	10.05	8.41918	8.85469	8.70627	8.34469	6.61074	8.5068	7.67783	9.2752	8.55482	9.21865
ZNF385A	7.91605	8.0419	8.24586	8.00697	8.22702	7.96555	8.52266	8.1032	8.32327	8.07937	8.70343	8.06595	8.68889	8.8889	7.70769	9.05022	8.35783	8.338	8.13046	8.82199	8.10082	8.65264	8.62889	8.41716	8.1151	8.25287	8.15308	8.19109	8.41454	8.39335	8.00665	8.25109	8.27103	7.7581	8.20275	8.17069	7.96441	9.39699	8.55676	8.04544	8.04061	8.03734	8.90246	8.63804	8.10822	8.35187	8.55587	8.49449	8.33499
ZNF384	9.15508	9.19936	9.15265	9.12435	9.03008	8.88097	9.0068	9.22702	9.10989	9.02663	9.03121	9.04397	8.85369	8.91069	9.10492	8.86021	8.82864	8.93682	8.65242	9.19341	8.98984	8.72276	9.12028	8.88652	9.03314	9.12435	9.08209	9.01487	8.88171	9.26234	8.9826	9.23335	8.91301	8.94859	9.32101	8.91004	8.98984	9.13799	9.06095	9.05129	9.26179	8.89423	9.13764	9.02153	9.14225	9.06932	9.11309	9.00438	9.25291
ZNF383	6.08975	6.65305	6.22241	6.61235	6.38498	5.85056	6.58801	6.11311	6.56394	6.10791	6.72884	6.49761	6.47113	6.6896	5.44394	6.24224	6.23673	6.43079	6.69467	6.30622	6.24224	6.12238	6.54466	6.10098	6.17031	6.1641	6.34187	5.88689	6.11828	6.05073	6.50452	7.22084	6.79545	6.31164	6.32217	6.44316	6.7445	6.34187	6.58074	6.27645	6.19981	6.69944	5.6371	6.12621	6.06348	6.87758	6.27774	6.05797	6.15851
ZNF366	7.73184	7.46797	7.19977	7.18443	7.31019	7.28329	8.11186	7.39204	7.49894	6.94462	8.06901	7.88896	7.17712	7.62205	7.7355	7.00827	7.32757	7.42409	7.93607	6.92616	8.29735	5.99848	7.50928	6.41157	6.84882	8.32855	8.62581	7.07092	6.90678	8.02025	7.52493	8.02763	6.88211	8.5922	7.8111	6.91462	7.42971	8.31489	7.40554	8.259	7.6403	7.27392	7.76405	5.39216	7.36659	8.16265	8.10801	6.7114	7.55722
ZNF365	6.78983	6.94313	6.31224	6.19481	5.24434	6.48378	6.3931	6.08886	5.93771	6.11462	7.52317	7.30304	5.93494	6.49231	6.96121	5.92358	6.45103	6.58418	6.76608	7.09026	7.92357	6.35619	6.48378	6.62395	6.43413	7.68763	7.60369	6.23602	6.59622	7.09323	7.39128	4.23391	4.77949	6.6996	6.98019	5.8985	6.87242	6.28631	5.23222	6.75617	6.77364	6.60574	6.35029	5.91958	6.28399	6.92633	7.34631	7.4325	7.33968
ZNF362	10.4019	10.2873	10.2332	10.235	9.58076	10.202	9.92275	9.45071	10.3681	10.0289	10.166	10.4471	10.1422	10.3999	10.2759	9.81103	10.2869	10.7132	10.5096	10.6849	10.5626	9.77417	10.06	9.58044	10.2558	10.6345	10.3694	10.2377	10.3151	10.5793	10.1118	10.3472	9.54719	9.98156	10.1098	10.3818	10.3184	10.0192	10.0108	10.4416	10.4067	10.3973	10.4661	9.41736	10.1471	10.2335	10.3987	10.3951	10.4337
ZNF358	9.54993	9.19385	8.87167	9.12508	9.32158	9.18391	8.97137	9.08405	9.50543	9.172	9.51768	9.519	9.17678	9.22499	9.14009	9.68659	9.69571	8.92796	9.53267	9.55349	10.1658	9.03839	9.09815	8.95608	9.14691	9.849	9.46697	9.17748	9.50021	9.62243	8.8951	9.8076	9.25338	9.12276	9.23395	9.41822	9.20078	9.45163	9.14132	9.56496	9.5805	9.24861	9.82533	8.79759	9.09991	9.14195	9.6393	9.76787	9.80915
ZNF354C	2.643	3.21031	4.1764	2.48578	2.98782	2.67488	3.53432	2.55955	4.77983	2.6877	2.80609	2.57706	2.64543	2.60621	2.46572	2.69407	2.69156	3.13429	2.6159	2.37267	6.03347	2.46915	2.69862	2.6191	3.11872	2.74642	3.39187	2.40128	3.24349	2.85449	2.64119	3.6639	2.45776	2.50116	2.79116	3.02786	2.99723	2.66213	3.83731	2.8153	3.38528	3.68498	2.69407	2.60992	2.54387	2.99258	2.58663	3.13286	2.736
ZNF354B	5.16722	5.47092	5.47435	5.56078	5.6399	5.59883	5.47161	5.75584	5.47999	5.2082	4.85714	5.45125	5.58502	5.78581	5.176	5.25035	5.51898	5.3144	5.29763	5.1656	5.4107	5.49687	5.46178	5.79541	4.94302	4.68983	5.01174	5.58611	4.84234	5.34141	5.42592	5.79541	6.01385	5.60438	5.69517	5.45441	5.56662	5.64625	5.85151	5.5332	5.23686	5.77993	3.63749	5.22782	5.52547	5.29515	5.47161	5.28726	5.22045
ZNF354A	5.75103	6.12268	5.77464	6.24038	6.02563	5.88494	5.82348	6.19501	5.71801	5.53965	5.70954	5.60709	5.82798	5.96426	6.1305	5.58197	5.9208	6.21452	5.82854	5.86403	5.92025	5.44231	6.09459	5.84548	5.43433	5.74579	6.02635	5.67241	5.52314	5.80501	6.04351	6.03227	6.19501	6.0351	6.31437	5.77639	6.03723	6.09459	6.09951	6.16885	5.94563	6.07103	4.73665	5.59928	6.12133	6.0351	6.00004	5.29556	5.28137
ZNF350	7.97956	8.09176	8.43507	8.07818	7.92597	7.92378	8.43948	7.71234	8.32274	8.03717	8.24731	8.22131	7.41378	8.44758	8.03823	7.31033	8.38174	8.42787	8.44188	8.1292	8.2592	7.49584	8.32715	7.73251	8.18221	8.07242	8.59933	8.1981	8.09119	8.18488	8.35413	8.08124	7.70917	8.0521	8.50836	8.09119	8.35034	8.34181	8.37618	8.34883	8.00745	8.06422	7.44828	7.2609	8.26442	7.94858	8.43627	8.08505	7.72239
ZNF35	6.94265	7.1868	6.65434	7.29377	7.77919	7.22317	6.77315	8.38923	7.07523	7.74222	7.52524	6.98263	7.55808	7.44559	7.2686	7.13267	6.83172	7.22472	6.83013	6.65317	6.98776	7.17755	7.37374	7.73072	6.84776	7.22056	7.4191	6.65769	7.04162	7.14735	6.74382	7.30384	7.40003	6.94906	7.65808	7.23279	6.95088	7.49245	7.46033	6.97566	7.06058	7.25161	7.59538	7.33068	7.28035	7.21815	7.22702	6.7523	7.23781
ZNF347	5.93996	6.47868	6.04593	6.37761	6.79798	5.90633	6.43229	6.56978	6.20735	6.45592	6.5442	6.38541	6.44092	6.41901	6.51516	5.55692	6.57099	6.50992	6.40725	6.35214	6.42733	5.27057	6.39183	6.2692	6.2485	6.67103	6.40265	6.40413	6.31886	6.63204	6.2955	6.60726	6.75528	6.27752	6.70054	6.59773	6.42257	6.0592	6.1554	6.73386	5.86741	6.71526	5.99839	5.79955	6.29891	6.44556	6.47801	6.27476	6.37007
ZNF346	6.87953	6.9412	6.75202	6.60286	6.64508	6.4842	6.92406	6.55247	6.83019	6.69604	6.70604	6.78313	6.03755	6.5416	6.53479	5.95705	7.08153	6.45846	6.94302	6.60024	7.07789	6.05601	6.75942	6.41646	7.1667	7.76876	7.10133	6.73311	7.11377	7.18157	6.96924	6.92813	6.59733	6.53273	7.31478	6.66706	6.88816	6.88167	6.63748	7.2977	7.33318	6.52302	7.41895	6.13628	6.5702	6.8012	7.12523	6.62508	7.04966
ZNF343	5.97633	5.25314	6.00857	5.70351	5.45165	6.01949	5.56365	6.0039	5.37852	6.52634	5.93561	6.85778	6.08725	5.87202	6.83925	5.21296	6.00232	5.61235	5.48315	5.96858	5.78648	5.74191	5.94547	6.45865	5.62789	6.10826	5.69529	5.50376	6.31823	6.35065	5.61235	6.5845	6.47657	5.0863	5.66378	6.25271	6.08577	6.37334	6.19189	5.98007	5.81503	6.44481	6.68684	4.67422	5.75755	5.584	6.04105	4.90424	6.53027
ZNF34	7.07511	7.48394	7.04015	6.96697	7.27375	7.092	6.86961	6.90168	7.30322	7.28856	7.38123	7.24249	7.16371	7.29005	7.25645	6.76336	7.42921	7.39164	7.74014	7.10386	7.45217	6.64949	7.01603	6.96049	6.94221	7.39769	7.33354	6.98155	6.89924	7.63285	6.76127	7.97878	7.4669	6.96145	7.347	7.33314	7.62848	7.03302	7.13292	7.65533	7.05153	7.21781	7.22568	6.9095	7.27278	7.62359	7.11642	7.64556	7.37606
ZNF33A	7.49927	8.21704	8.37379	7.47791	8.25467	8.54281	8.45273	7.70544	7.58065	8.20275	7.40091	8.51505	8.22423	8.30407	7.7994	7.8964	8.45273	8.07019	8.21102	7.94179	7.85694	8.52524	8.12641	8.61248	8.35461	8.10276	7.82175	8.29338	8.48074	8.03527	8.05005	8.23352	8.25234	7.89875	8.32935	7.73885	8.0796	8.20741	8.23791	8.23036	7.50513	8.02281	7.84738	7.81123	7.76004	8.40472	7.88646	8.29833	7.87155
ZNF337	9.40152	9.13257	9.52106	9.48386	9.43953	9.13307	9.09094	9.43647	9.4407	9.35541	8.97232	9.13536	8.79442	9.20681	9.26099	8.64672	9.0955	9.08641	8.77255	9.36579	9.5368	8.47423	8.93372	8.90631	9.18509	9.26187	9.37182	9.19979	8.91836	9.3982	9.54804	9.38917	9.35709	9.20011	9.74572	9.22529	9.43484	9.29318	9.13103	9.39843	9.62055	9.27405	8.83466	8.75296	9.4311	9.19742	9.38471	9.00989	9.09778
ZNF335	7.06058	7.25279	7.08709	7.27552	7.34524	7.06741	7.27707	7.53689	7.19815	7.30789	7.08763	7.19586	7.29512	6.98948	7.2016	7.92893	7.33906	7.04573	7.16378	7.34123	7.20591	7.117	7.21578	7.37833	7.40681	7.2934	6.92292	7.282	7.2078	7.30057	7.2692	7.33383	7.23424	7.07627	7.60336	7.22937	7.2585	7.41907	7.27231	7.32477	7.30732	6.96903	7.42863	7.21182	7.15305	7.33517	7.48288	7.06365	7.19991
ZNF334	6.92135	7.45828	7.47566	7.34426	6.38901	7.85834	6.88879	5.02173	6.55082	7.09695	6.48228	6.71579	6.52924	6.77412	6.5756	4.91986	6.53191	7.49954	6.5756	7.16905	7.17643	6.91812	6.32848	6.51357	7.02569	6.47382	6.96447	7.00521	6.71202	7.20972	7.39155	7.09608	6.68494	6.74893	7.69462	7.76545	6.80697	6.71114	7.06502	5.90112	8.18296	6.38026	3.23861	5.71801	6.77162	6.87858	6.68727	6.49521	6.51861
ZNF333	7.32922	7.87705	7.10886	7.48807	7.56562	7.3164	7.07453	7.47228	7.75346	7.23826	7.4798	7.3608	7.27579	7.41364	7.5075	7.0078	7.54196	7.60613	7.19993	6.90032	7.63991	6.62139	7.38644	7.10651	7.31436	7.38419	7.24699	7.4572	7.16096	7.85849	7.39583	7.77196	7.83181	7.23531	7.55727	7.71191	7.27928	6.96432	7.18967	7.37241	7.66671	7.34824	7.43077	6.53978	7.44818	7.60415	7.1763	7.34082	7.46932
ZNF330	9.73365	9.81749	9.57493	9.9936	10.1139	9.49341	9.48338	10.2632	9.76966	9.70801	9.97063	9.70246	9.65631	9.79658	9.64582	9.7178	9.28048	9.74325	9.58784	8.91335	9.72926	9.56485	9.73214	9.9313	9.58718	9.36887	9.75828	9.54881	9.49066	9.66042	9.5548	9.82914	10.0913	10.0799	9.24983	9.87511	9.76332	9.76273	10.0539	9.38401	9.76129	10.098	9.06021	9.55425	9.74325	9.54824	9.55853	9.4331	9.69557
ZNF329	6.98395	7.86338	7.61351	7.65103	7.91553	7.99138	7.85781	7.60041	7.19543	7.71186	7.78711	8.08456	7.69246	7.97272	7.71497	7.58002	8.62785	7.79748	8.18069	7.40192	7.88592	7.13261	7.68859	8.06352	7.97554	8.22949	7.64377	8.16198	8.35985	7.92694	7.58098	8.11466	8.49199	7.40829	8.36313	7.61951	7.88431	7.62214	7.14742	8.02219	7.51759	7.77885	7.99589	7.19411	7.79943	7.92694	7.91447	7.96304	8.08657
ZNF326	4.39853	3.78523	3.86822	3.64372	3.62787	4.2494	4.23077	3.64921	3.63771	3.61358	3.61358	3.64255	3.60575	3.65723	3.63179	3.66501	3.61453	3.62994	3.54315	3.61049	3.60875	3.58378	3.4367	4.11777	3.56945	4.24104	3.42425	3.5258	5.23477	4.61807	3.62884	3.59914	3.57554	3.6159	4.5259	3.98636	3.59113	3.59823	3.58004	3.62021	4.07844	3.62212	3.64473	3.79823	3.83802	3.56096	3.64165	4.84684	3.58099
ZNF324	9.03281	8.67707	8.64916	8.42983	8.88369	8.38395	8.45623	8.75082	8.91556	8.52023	8.60742	8.52995	8.43702	8.32401	8.70057	8.93513	8.84338	8.44721	8.8249	8.79679	8.78086	7.72321	8.25733	8.50568	8.72531	8.99107	8.48182	8.62489	8.63985	8.70905	8.60272	8.72627	8.94996	8.653	8.98822	8.59447	8.53774	8.68839	8.64091	8.80261	8.76037	8.33233	8.90854	8.8249	8.77861	8.72601	8.70109	8.49057	8.90174
ZNF323	8.33064	7.6217	7.98143	8.07739	7.34852	7.41646	7.75933	7.1123	8.39067	7.8067	8.56313	8.32664	7.21215	8.37857	7.90042	8.41915	8.13845	8.46306	7.85582	8.91978	8.89905	6.89018	8.33998	8.02794	7.80083	9.43172	8.20502	8.51666	7.89036	8.58368	8.1535	9.21632	6.52587	8.01133	8.18738	7.82096	8.51595	8.26388	7.08461	8.37709	8.35484	8.40463	7.86623	6.2831	8.07321	7.67505	8.15417	8.00872	10.0171
ZNF320	7.39468	7.48647	8.14012	7.90118	7.48989	7.83205	8.36847	7.51328	7.20835	6.85964	7.8986	7.933	7.03152	8.18083	7.92306	6.6873	7.92306	8.34757	7.93866	8.43568	7.7324	7.3106	7.96503	7.71794	7.82504	7.61709	7.80295	7.86206	7.84053	7.70421	7.93443	7.98749	7.72803	7.49822	8.33244	7.56899	8.34935	7.7984	7.76348	8.08043	7.3996	8.28455	6.95349	7.2905	7.83097	7.81485	7.57858	7.94754	7.16127
ZNF32	8.78272	8.8644	9.02384	8.82077	8.58196	8.73291	8.85634	9.10639	8.80654	8.86788	9.22276	9.05027	8.94809	9.23231	8.99978	8.60567	8.63159	8.97383	8.75472	8.92883	9.18056	8.76989	9.06292	8.94809	8.89811	9.17963	9.12641	9.07841	9.01134	8.90982	9.0169	9.05479	8.74977	8.82513	8.95683	9.02547	8.98217	9.27189	8.87868	9.17963	9.2424	9.22735	9.23126	8.25497	8.81022	8.8667	9.09953	8.80873	9.02002
ZNF319	7.54523	8.03971	8.33729	7.92133	8.41159	8.49185	8.78938	8.00992	7.28338	8.0214	8.49483	9.1544	7.7953	8.82246	8.17943	7.60428	8.72353	9.07475	8.60504	8.72528	8.65706	8.31881	8.71263	8.92976	8.55774	8.92948	8.76124	9.03124	9.23105	8.7081	8.60012	8.39242	8.42331	8.24973	8.64905	8.18604	8.56565	9.02606	8.31242	9.40512	8.16408	8.6559	8.9039	8.06112	8.4705	8.16951	8.64145	8.90337	9.18542
ZNF318	7.06208	6.7981	7.23956	7.35044	6.49388	6.68859	7.34651	5.34857	7.64918	7.15339	7.45846	7.10165	7.24716	7.30552	7.14084	7.28782	7.36511	6.70329	7.02262	7.51126	7.54485	6.08667	7.10957	6.23129	6.14447	7.25956	7.5032	6.96428	7.29118	7.33376	7.19519	7.78338	6.19459	6.97635	7.85727	6.97773	7.01983	7.39202	6.86341	7.56827	7.04713	6.96793	7.73834	6.72041	7.26184	6.91311	6.69504	6.53266	7.58612
ZNF317	8.79407	8.66786	8.75702	8.89552	9.10762	8.54715	8.89742	9.30632	8.98593	8.82555	9.05506	8.72187	8.68368	8.72773	8.70111	9.07864	8.89432	8.66634	8.81243	9.1359	8.83407	8.54149	9.07887	8.97364	8.7258	8.97257	8.9361	8.78541	8.88823	8.92418	8.97308	8.8734	9.0292	8.74183	9.12124	8.73634	8.77943	9.24434	9.14775	8.78714	8.89649	8.77203	9.39906	8.92799	8.70939	8.66209	9.08574	8.79678	8.84019
ZNF311	4.20433	3.38303	4.59866	4.34976	3.7761	4.02426	4.65386	3.48161	4.94779	3.35718	4.39444	4.28464	3.81934	4.49476	4.00094	2.91829	3.50599	5.43857	2.77634	4.70252	5.3068	3.89279	4.24891	2.81576	3.60349	4.98765	4.28076	3.76424	4.80866	4.80516	4.44523	5.14572	2.54088	3.93562	4.10976	4.38998	5.04701	4.72808	4.05081	3.99145	5.04701	4.56043	3.2425	2.58398	4.90501	3.61461	4.39812	2.32885	3.35049
ZNF304	7.09375	7.18245	6.80767	7.39538	7.02249	6.21393	6.95971	7.52021	6.92112	7.14763	7.24661	7.07125	7.1533	7.60597	7.07804	6.58926	7.33512	7.08736	7.29211	7.17545	7.26079	6.60933	6.86424	7.0237	7.03079	7.65744	7.139	7.17583	7.37668	7.32828	6.78388	7.40342	7.75432	7.32767	7.50715	7.14326	7.16223	6.93471	6.87047	7.52898	7.51991	7.43386	7.04386	6.58412	7.23899	7.23232	7.17215	6.8629	7.44393
ZNF302	10.576	10.4419	10.578	10.8803	9.9431	10.012	10.0674	9.84225	10.4909	10.0511	10.008	10.1512	9.81481	10.3783	10.4542	9.57966	10.1927	10.6567	10.1695	10.1054	10.4924	9.23821	10.5197	9.59984	10.1331	10.1846	10.9847	10.293	9.87385	10.45	10.5051	10.6455	10.166	10.538	10.699	10.5407	10.6136	9.95805	10.1417	10.257	10.5396	10.6735	8.55538	9.45524	10.7238	10.1745	10.1879	9.86975	10.0615
ZNF30	7.15423	8.14783	7.94085	8.23842	7.07143	7.47091	7.59593	6.73861	8.00406	7.06307	7.78849	7.93894	6.99368	8.10835	7.68477	6.23777	8.5212	7.8638	8.02381	8.03495	8.25166	7.20947	8.09762	7.39833	7.69609	8.02746	8.26754	8.24106	7.84307	7.74183	7.83461	7.93814	7.40369	7.08851	8.27678	7.658	8.15105	7.76828	7.33654	8.4205	7.98474	7.90608	7.10746	6.0269	7.62704	7.602	7.97501	7.9455	8.15423
ZNF3	8.14621	7.36271	7.78406	7.54649	7.49042	7.60231	7.57268	7.60486	7.78065	7.37226	7.67087	7.1937	7.32269	7.49615	7.70012	6.99163	7.46134	7.7341	7.40419	8.01976	7.75393	6.71656	7.51684	7.24983	7.66386	7.85778	7.80582	7.31255	7.43827	7.85248	7.78563	7.56701	7.15256	7.60769	7.92235	7.62416	7.39737	7.74809	7.71359	7.64539	7.92731	7.3144	7.98815	7.98815	7.90987	7.21891	7.55157	7.28826	7.59037
ZNF296	5.63019	5.35307	6.33851	5.32618	6.20779	5.72109	6.18325	5.96171	5.85161	5.42386	6.07072	6.84291	5.42779	5.80036	5.35307	6.097	6.54904	6.19406	5.59366	6.03648	6.17287	5.02505	6.1221	6.41685	6.13714	6.0128	6.05157	6.05589	6.11355	5.88147	6.12059	5.92411	6.22023	5.6998	5.95545	5.65407	6.12059	6.87509	5.92411	6.11919	5.87876	6.19274	6.24166	6.1527	5.73569	6.5309	5.99609	6.20353	6.32706
ZNF295	8.62059	8.90457	8.22487	8.29412	10.1577	8.89539	8.50095	10.216	8.40572	10.0173	8.45371	9.26281	8.85459	8.74788	9.07784	9.78209	8.71968	9.10888	8.51721	8.54782	8.92726	8.67022	8.19887	10.2543	8.84279	8.3883	8.59533	8.67523	8.60664	8.61925	8.35857	9.2527	10.301	9.56035	9.43274	8.76261	8.73776	8.40099	9.03406	8.97001	8.04064	8.36472	7.84455	9.64946	9.02178	9.03617	8.51212	9.04452	8.62174
ZNF292	6.04647	6.11119	6.19441	6.06885	5.94354	6.00971	6.02725	5.35556	6.04882	6.05369	5.46542	6.11887	5.69876	5.73646	6.00485	5.29399	6.37252	5.95698	6.34957	5.93431	5.67145	5.90844	5.69912	5.4246	5.91949	5.80316	5.87643	5.90624	5.87141	5.91799	6.10179	6.24713	5.36709	5.66208	6.16603	6.10921	6.05133	5.54334	5.93367	6.07564	5.61514	5.91088	5.50848	5.68519	5.86248	6.03141	6.22724	5.79713	5.70325
ZNF287	5.41921	4.9883	4.56168	4.73442	3.80613	4.61533	4.37707	4.57441	5.19264	3.69488	4.57257	5.14503	3.38115	4.94692	5.0725	2.08727	5.1664	5.2353	5.10301	4.52928	5.30886	3.8537	4.88531	4.40839	4.7288	4.88812	5.44255	5.33786	4.61845	4.96046	4.9213	4.64399	3.60029	4.0049	5.08937	4.59703	4.84949	4.26234	3.81555	5.1233	5.25374	4.79978	4.64215	3.94828	4.6377	4.18337	5.24175	4.08761	4.53421
ZNF286A	3.89253	4.84039	3.55371	4.81725	4.50091	4.93521	6.73943	7.61125	4.02392	3.72658	5.02859	3.65261	5.051	4.61124	4.2404	5.31229	3.84875	3.88968	3.57935	4.37368	4.64895	5.15719	4.72315	4.74157	3.4668	4.35596	2.4518	3.52612	4.04951	4.01337	4.57245	4.84954	5.16079	3.81437	4.98407	3.99592	4.93521	5.18123	4.87893	3.57684	4.14353	5.32832	3.92733	3.88968	4.29812	3.52302	4.75641	4.73306	4.32599
ZNF283	6.08462	6.55893	6.24023	6.67998	6.50192	6.76543	6.32701	6.81624	6.36673	5.91953	6.2488	6.42683	6.6377	6.40174	6.45352	6.38094	6.52826	6.74786	6.51889	5.79796	6.45582	6.64528	6.46832	6.19739	6.27651	6.29541	6.61381	6.30715	6.41837	5.94904	6.24802	6.88921	6.69045	6.03262	7.01069	6.16067	6.69611	6.28204	6.42134	6.4258	6.1123	6.69465	4.97506	5.57628	5.96051	6.50688	6.13856	5.97744	6.50981
ZNF282	7.38515	6.70292	7.0054	7.1373	7.1467	7.3668	7.31419	7.24989	7.09235	7.06441	7.37786	7.27179	6.98689	7.04402	6.83159	6.91535	7.49542	7.16679	7.32074	7.68673	7.82251	6.45925	7.06722	7.11431	6.8622	7.70872	7.44096	7.09987	7.33508	7.44716	7.05778	7.18256	7.18856	6.95641	7.5426	7.08824	7.30221	7.83335	7.41819	7.38476	7.10914	7.00916	7.92538	7.31574	7.25602	6.86322	7.58594	7.44163	7.40764
ZNF281	9.13044	9.34073	9.10976	9.51928	9.83522	9.16318	9.4291	10.1711	9.23449	9.26769	9.27793	9.25762	10.0582	9.308	9.54472	10.2879	8.72776	9.62653	8.92041	9.37452	9.22143	9.13535	9.24447	9.12798	8.84654	9.45357	9.1858	8.84368	8.82721	9.1967	9.30032	9.07664	9.48845	9.73344	9.62412	9.08885	9.09045	9.26022	9.49705	9.28431	9.31557	9.3189	8.77103	9.82557	9.22824	9.35281	9.14853	8.31049	8.85684
ZNF280D	8.77771	9.01904	8.77715	8.81015	7.78778	8.51481	8.41715	7.88544	8.73823	8.43012	7.90242	8.61188	8.29256	8.49038	8.58913	7.23286	8.80124	8.6768	8.88781	8.42608	8.42312	8.56366	8.58057	7.82038	8.64629	7.99787	8.48129	8.60913	8.51877	8.78741	8.66417	9.23089	8.04075	8.36369	8.67277	8.83814	8.68312	7.9307	8.29391	8.55307	8.3878	8.49978	7.08249	7.64225	8.75551	8.69398	8.40464	8.61137	7.88884
ZNF280C	6.96043	7.35005	7.49555	7.08468	7.97635	8.33584	7.58729	7.82352	7.46713	7.55178	7.09346	7.49736	7.55419	7.36164	7.26201	6.94415	7.81489	7.06908	7.86817	7.54627	7.12312	7.72207	7.16005	7.57773	7.25658	7.50762	7.00339	7.58117	7.5841	7.24028	7.33284	7.68559	7.66986	6.78985	7.62817	7.36447	7.5688	7.41239	7.7765	7.3955	6.8764	6.93533	7.14242	7.10728	7.24801	7.61628	7.53623	7.36886	7.28268
ZNF28	6.18399	5.92772	5.82537	6.42611	5.75375	5.87938	5.65769	6.77744	5.68433	5.99817	6.71675	5.96817	5.70187	6.2382	5.90648	5.79552	5.87815	6.24765	5.73805	6.11132	6.05585	5.59891	5.99817	5.83202	5.70187	6.03308	6.12263	5.99273	5.66345	5.99373	6.11789	6.15567	6.17555	6.18932	6.35604	6.17288	6.40796	5.96528	5.84268	5.73194	5.6039	6.54567	5.86817	5.59607	5.91138	5.77703	5.95969	6.09761	5.73472
ZNF277	9.31672	9.86862	10.0544	9.49573	9.48754	9.77713	10.0765	8.7585	9.66951	9.66468	9.9169	10.1016	9.5522	10.0272	9.51884	9.43329	9.46702	9.79543	9.95608	9.77201	9.78483	9.91303	9.76054	9.45955	9.45507	9.28766	10.0662	9.57315	9.58426	9.64099	9.77201	9.71662	9.42023	9.76207	9.44073	9.97224	9.87135	9.7989	10.245	9.60408	9.40237	10.0407	9.14277	9.71746	9.94922	9.65035	9.5149	9.54406	8.89769
ZNF275	6.18011	7.30951	6.34737	6.24347	7.86281	7.05839	7.2075	7.70795	6.79473	7.27468	6.87653	7.31206	7.66083	6.65431	7.2969	8.32327	7.08746	7.19604	6.3556	6.73945	6.63879	7.8149	6.62662	8.04346	6.83689	6.87827	6.36523	6.48385	7.09611	6.88293	6.65778	7.99649	7.68295	7.17741	6.8402	6.97561	6.77721	6.76136	7.94731	6.73752	6.21236	6.76417	7.19761	7.57315	6.39851	7.46965	6.64675	6.62312	7.17458
ZNF274	9.43951	9.30924	9.09747	9.38649	10.1798	8.69074	9.16964	9.66913	9.24934	9.80588	9.56951	9.70152	9.05794	9.16541	9.34254	10.0663	8.86653	9.4538	9.14053	8.86323	9.46916	8.74534	8.94534	9.60751	9.10395	9.04269	9.5194	9.19306	9.06819	9.33119	9.47433	9.58803	10.1103	9.45549	9.49054	9.30041	9.3521	9.27363	9.38207	9.3015	9.42242	9.33886	9.02922	9.11841	9.43506	9.70574	9.25655	9.24441	9.30098
ZNF273	5.7341	5.33236	6.05659	5.05415	5.5641	5.44382	5.75458	4.98984	5.38568	5.39773	5.34402	5.51926	5.64019	5.83464	5.49097	4.94247	5.9094	5.40134	5.62229	5.56634	5.2182	5.26984	5.48637	5.47458	5.99782	5.46408	5.66119	5.84159	5.90814	5.219	5.6878	6.04063	5.47126	5.50737	6.00715	5.58666	5.67371	5.29659	5.13528	5.57658	5.3989	5.24078	5.42474	5.38927	5.64863	5.5952	5.27465	6.00563	5.28533
ZNF271	9.12746	8.75158	9.31623	9.31445	8.98912	9.28966	9.32873	9.55973	9.55631	9.05747	9.10211	8.9003	8.54945	8.89861	9.38218	8.84793	9.24509	9.28795	9.14753	9.39652	9.11939	8.74896	9.45322	8.65521	8.7258	9.16447	9.29929	8.99379	8.62899	9.49543	9.42688	9.0334	8.90727	8.97682	9.69201	9.06537	9.09963	8.54671	9.3834	9.17602	8.75373	9.03642	8.61248	8.50756	9.53637	9.17166	9.1508	8.82497	8.85649
ZNF266	9.84656	10.0908	9.98558	10.3657	9.82995	9.40022	10.108	9.54014	9.53835	10.0394	9.7752	9.49862	9.8634	10.0191	9.16706	9.42851	10.2309	9.87404	9.88028	10.2825	10.1223	8.3533	9.66532	9.40915	10.1833	9.25588	10.2441	9.02147	9.31867	9.95846	9.45412	9.43544	9.64686	10.3033	10.2281	9.38262	9.98265	9.31598	9.44534	9.80804	9.34535	9.82642	9.11374	9.60425	9.43832	10.1252	9.87983	9.59476	9.46902
ZNF263	9.11749	9.19553	8.98973	9.23908	9.65859	8.68837	8.9967	9.94935	9.31242	9.37395	9.10566	9.07147	9.10001	8.84905	9.13217	9.76368	8.98047	8.95667	8.80158	9.04571	9.32832	8.57783	9.01933	9.44723	9.0333	9.37332	9.04977	9.01147	8.9577	9.40333	8.97777	9.60121	9.80464	9.13157	9.43242	9.09241	9.03283	9.34519	9.70146	9.12699	9.32074	8.99036	9.57246	9.39753	9.13862	9.15571	9.07092	8.90636	9.25292
ZNF26	8.02348	8.85042	8.23895	8.58074	8.90095	8.3465	8.40222	8.9921	8.19166	8.58397	8.0828	8.02466	8.5954	8.4597	8.53459	8.59192	7.88876	8.50157	7.92416	8.38127	8.06135	8.29547	8.22473	9.0525	8.11397	7.55455	8.16017	8.22844	7.79533	8.44601	8.45168	8.60561	8.79767	8.58892	8.4662	8.93646	8.54392	8.27541	8.76603	7.94749	8.30689	8.69185	6.6665	8.81517	8.44179	8.40132	8.15312	7.96048	7.68802
ZNF259	8.45175	8.76119	8.7747	8.91478	9.7123	9.03992	9.14637	10.1752	8.82328	9.41981	9.06357	8.92994	9.26347	9.03736	8.7821	9.29049	9.16601	8.79929	8.93468	8.94802	8.57077	8.96806	9.61497	9.79747	9.03519	8.93915	8.66608	9.21497	9.24227	8.76745	8.64419	9.09057	9.91164	9.03736	9.12976	8.87821	8.99167	9.23041	9.23912	8.97094	8.7214	9.26766	9.32264	9.51858	8.75371	8.95208	8.92849	9.2181	9.08283
ZNF256	8.72477	8.72364	8.27761	8.562	8.96495	8.29548	8.33759	8.98783	8.54132	8.55373	8.51606	8.60235	8.39394	8.53958	8.62224	8.53291	8.93352	8.45039	8.84152	8.95842	8.31905	8.07964	8.42569	8.63537	8.74185	8.54367	8.72659	8.511	8.62752	8.67268	8.40283	8.8214	8.94343	8.32713	8.83146	8.5069	8.75342	8.77497	8.20709	8.62933	8.54859	8.38938	8.24632	8.46515	8.62602	8.56331	8.51468	8.36899	8.33594
ZNF254	8.971	9.4415	9.7817	9.92179	9.21057	9.10434	9.98781	8.86406	9.14123	9.41164	9.49939	9.68457	9.00334	9.69137	9.68354	8.97529	9.37345	10.155	9.95549	9.58154	9.24583	8.79411	9.54877	9.21553	9.66805	8.9313	9.55854	9.75871	9.17115	9.4634	10.0044	9.75632	9.50547	9.76346	9.85049	9.71211	10.0322	8.91132	9.31913	9.59099	9.05133	9.95803	7.94043	9.09474	9.70867	9.4988	9.19622	9.49767	8.50037
ZNF253	3.01701	3.27637	3.7629	2.56542	2.47471	2.91973	3.80176	2.90018	3.83935	3.23244	4.31944	3.83537	2.48654	4.24333	3.54855	1.19915	3.54639	4.16582	4.06006	3.64812	4.05681	2.92523	3.65687	3.67069	5.50502	3.51364	3.45405	2.81294	3.50405	3.70291	3.35656	3.47001	3.80176	2.85324	3.90732	3.39085	4.63522	1.2657	3.89113	3.58395	2.85324	3.96351	1.62443	2.32803	3.25185	2.14512	6.22639	3.15677	4.22383
ZNF251	6.26106	7.16867	6.72191	6.57267	6.12536	6.68362	6.28507	5.51215	6.39947	6.48826	6.17899	6.50764	6.42809	6.59965	6.11585	5.60131	6.87092	6.44127	6.80271	6.58587	6.62392	6.27933	6.26035	6.1661	6.91144	6.37627	6.54424	6.63589	6.66006	6.59272	6.59786	7.92789	6.30588	5.99726	6.90727	6.64733	6.85635	6.25071	6.27043	6.74384	6.75995	6.46336	5.71452	6.01515	6.6918	6.98152	6.19687	6.59412	6.43001
ZNF250	7.2438	7.53275	7.33851	7.27946	7.59351	7.09115	7.07981	7.18563	7.67854	7.41509	7.34329	7.68023	7.18002	7.49488	7.5864	6.79477	7.46084	7.64826	7.48566	7.39055	7.67084	6.96458	7.34421	7.17502	7.19447	7.3886	7.68808	7.1433	7.76494	7.56756	7.16872	7.27611	7.61526	7.42406	7.55919	7.66047	7.67854	7.27946	7.43292	7.80022	7.42345	7.67084	7.51793	7.15306	7.47074	7.57373	7.44319	7.40081	7.70987
ZNF25	8.67048	9.41478	9.42821	9.12168	8.94401	9.48597	9.54171	8.64402	8.66204	9.6546	9.23362	9.44714	8.97054	9.53467	9.45327	8.63713	9.89988	10.0419	9.73114	9.21467	9.41271	8.61213	9.18868	9.10494	9.34652	9.15678	9.81111	9.60031	8.99902	9.56447	9.12409	9.74649	9.22193	9.46958	9.63679	9.48384	9.61129	9.07398	9.01922	9.75708	8.82611	9.16812	8.17116	8.62526	9.34764	9.3949	9.20786	9.32694	8.91636
ZNF248	6.54565	6.77407	6.32018	6.94884	5.86467	6.93954	6.71603	6.08443	6.71872	6.79083	5.90417	6.59974	6.48661	7.48736	6.55781	3.97246	6.98269	6.4512	6.34178	6.5171	6.84774	6.38851	6.63062	5.90055	6.8117	6.43615	5.52627	6.16297	6.54494	6.97342	6.55249	7.18134	6.83133	6.51457	6.57775	6.40498	6.96665	6.86979	6.73305	7.47045	6.4727	6.6761	5.64529	5.74805	6.62481	6.19915	6.65752	5.29871	5.97669
ZNF24	9.26978	9.30249	9.45123	9.02109	9.55906	9.01367	9.443	9.4358	9.01704	9.45736	9.19255	9.68716	9.15481	9.34264	9.30249	9.26287	8.96568	9.74757	9.46368	8.73318	9.14276	8.70734	9.16426	9.52147	9.43362	9.44434	9.33906	9.43474	9.29362	9.28639	9.49485	9.36099	9.63025	9.71384	9.74757	9.443	9.67422	8.69581	8.89999	9.4397	9.40759	9.63275	8.76037	9.14364	9.39871	9.68036	9.3305	9.50476	9.46635
ZNF239	6.65902	7.30364	6.66214	7.33282	7.66206	8.10094	7.64827	9.48567	7.51051	6.70157	6.58732	6.78418	7.43256	7.13694	7.17533	6.00104	7.13694	7.48531	6.37592	7.08347	7.18361	8.14363	7.69823	8.07531	7.08445	7.27194	7.05568	7.39424	7.13731	7.18596	7.28702	7.3306	7.08751	6.27474	7.55213	7.1458	7.51117	7.59976	6.75276	7.2145	7.62512	7.54519	7.30934	7.38464	6.88405	6.61295	6.97899	6.74575	7.00187
ZNF238	5.0174	4.04668	3.86386	4.29816	4.45385	3.90855	3.23948	4.93046	4.0456	3.85515	4.72141	5.07687	4.31236	4.58531	4.40346	4.86183	3.90694	4.28401	4.05421	3.69421	4.58384	4.15346	4.14459	4.95796	4.38282	4.12757	3.56095	3.61697	4.35714	2.95942	4.64046	4.84643	4.4586	4.897	4.45507	4.49011	4.5537	4.45262	3.88858	4.11701	4.46262	5.2424	2.09809	4.07079	4.29816	4.16973	4.42905	3.6786	4.77429
ZNF236	6.27643	6.25547	5.91291	5.99021	6.1237	5.94803	5.77982	6.01986	5.89861	6.4233	5.99376	6.26835	5.76963	6.13277	5.9711	6.10986	6.28861	6.35616	6.04942	5.95345	5.8056	5.80178	5.83316	5.99675	6.12844	6.40725	6.03438	5.98116	6.38444	6.1447	5.9757	6.36268	6.0568	6.0952	6.4552	6.01328	6.60584	5.98893	5.85195	6.33899	6.0761	6.01902	5.40332	5.36264	5.62774	5.89696	6.38145	6.14853	6.07834
ZNF235	6.86606	7.20657	6.78289	6.97574	7.10488	6.13361	6.57374	6.83287	7.16752	6.87857	6.76113	6.66856	6.46648	6.69147	7.3085	6.82191	7.00522	7.09948	6.98935	6.22261	6.97976	6.28641	6.86606	6.41766	6.26597	6.77723	7.33869	6.77556	6.66303	6.95632	6.90666	7.02998	6.7311	6.68416	7.74862	6.49803	7.00155	6.75177	6.94912	7.11066	6.60485	6.52609	5.83605	5.70145	7.06169	6.87418	6.82919	6.33101	6.35878
ZNF234	8.30241	8.92186	8.9954	8.73937	9.10104	8.6313	8.68426	8.16291	8.76172	8.98163	8.29565	8.85959	8.69619	9.11225	8.64181	8.37038	8.73462	9.5903	9.43514	8.20045	8.73072	8.5938	8.73831	8.93107	9.16701	9.03765	8.44962	9.17202	9.42376	8.94242	9.255	8.10683	8.97513	8.23888	8.60614	8.31027	8.59684	8.10363	8.08881	9.3419	9.32128	9.07639	7.66117	8.05491	8.71578	8.55839	8.41331	8.38217	9.2067
ZNF233	2.88841	5.2696	2.90523	3.86214	2.56892	3.27036	2.78453	2.24526	2.51605	2.95489	2.57124	3.7787	2.32549	2.77373	2.199	2.52065	2.67056	2.70717	3.7225	3.86214	3.04773	2.3192	3.45895	2.5549	3.18628	2.27272	2.36555	2.15549	2.07944	3.15346	2.52962	4.47838	2.3337	2.1109	4.02376	2.24347	2.71244	3.09064	3.02783	2.48918	2.12491	5.76635	3.05058	2.27016	2.13043	3.21094	2.27016	2.50476	2.57856
ZNF232	8.44804	7.37517	7.94871	8.02872	8.01245	7.34227	8.5588	7.96692	8.7759	7.67418	8.00708	7.80355	7.38834	7.75129	7.95462	8.8636	8.11453	7.61412	8.85612	7.57739	7.98922	7.33434	7.75733	7.68117	8.78396	8.16912	8.24379	8.04453	7.97248	7.80685	7.9306	7.3887	8.12153	7.96203	8.23182	7.74554	8.08324	8.60325	7.97394	7.89836	8.22257	8.14208	7.96692	8.05125	7.99157	7.62418	7.96428	7.76365	7.77068
ZNF230	6.45483	5.91794	5.9402	6.37416	6.24848	5.71155	5.78746	5.98641	6.40641	5.69771	6.4343	6.34826	5.6843	6.38525	5.98457	6.10399	5.97882	6.21936	6.46588	5.65685	6.40806	5.45784	6.02849	5.79658	5.83409	5.86348	6.33596	6.25679	6.01114	5.92101	6.35789	5.95139	6.16379	6.27647	5.98041	5.80503	6.18752	6.36684	6.42152	6.30334	6.23964	6.59342	5.56752	5.25918	5.86056	6.20007	5.95208	5.75644	6.16219
ZNF23	8.44195	8.39201	8.28888	8.4893	8.04664	7.45213	7.57746	8.04664	8.08361	7.63273	7.8141	8.05496	7.69982	8.01078	8.34908	7.43092	7.43915	8.10454	7.79902	7.76438	8.2363	7.53994	8.15497	7.90596	8.02625	7.43686	8.53291	7.5029	7.54793	7.97022	8.54131	8.4843	8.0277	8.48234	8.24715	8.40827	8.24909	7.87973	8.16922	7.91144	8.16313	8.39014	5.66692	8.40494	8.54931	8.06224	7.69338	7.84241	7.50708
ZNF227	6.56035	6.99875	7.2043	6.92805	7.27552	6.90594	6.98721	7.02232	6.99126	7.06937	7.27205	7.22724	6.93969	7.42628	7.04097	6.98295	7.17078	7.12204	7.00049	6.96401	6.95065	6.48268	7.40447	7.04436	6.75836	6.73183	7.36182	6.95861	7.02575	7.43646	6.96295	7.60265	7.46635	6.97325	7.61653	7.10378	7.42628	6.81277	7.24917	7.2904	6.9226	7.37761	6.21561	6.66886	6.82904	7.06044	6.85665	7.11281	6.58516
ZNF226	8.33613	8.40433	8.62048	8.53976	8.13274	8.03935	8.37731	7.71545	8.45667	8.23506	7.89352	8.37239	7.71853	8.40897	7.89458	7.17628	8.48062	8.53026	8.75796	8.38867	8.49139	7.94432	8.22035	8.26692	8.48851	8.14411	8.46268	8.51866	8.39568	8.34905	8.74685	8.24302	8.12357	8.27382	8.45325	8.40173	8.57763	8.37438	8.24854	8.40433	8.31489	8.50357	6.58509	7.43816	8.45325	8.04322	8.38431	8.0983	8.00541
ZNF225	6.16705	6.50584	6.60123	6.09661	6.63359	6.18956	6.62559	6.32396	6.38609	6.4312	6.65839	6.69611	6.31114	6.71204	5.88516	4.87955	6.53807	6.40027	6.72991	5.92164	6.35258	5.63977	6.36242	6.60248	6.21907	6.28519	6.94114	6.6229	6.56026	6.52388	6.3444	6.75289	6.81572	6.19138	6.57282	6.11586	6.71288	6.61752	6.3522	6.55601	6.15634	6.87682	5.40173	6.04919	6.24683	6.69423	5.6503	6.05618	6.31398
ZNF224	7.42352	7.7245	7.95445	8.02535	7.6869	7.60729	8.18543	7.31156	8.06041	7.34317	7.46994	7.52487	7.67761	7.99196	7.8407	7.0697	7.97517	7.75331	8.033	7.55742	7.57523	7.02688	7.66776	7.10554	7.86765	7.40522	7.99306	7.62734	7.37155	7.65378	8.0732	8.12496	7.84935	7.54805	7.84015	7.66233	7.92876	7.9463	7.83283	7.66261	7.62958	8.02341	6.19928	7.28688	7.62906	8.02593	7.86588	7.40091	7.5383
ZNF223	8.68709	9.19943	9.02698	9.14255	8.89602	8.59378	9.02828	8.37319	9.00098	8.77168	9.15207	9.43868	8.89921	9.43939	9.01416	8.18588	9.2986	9.17848	9.24868	9.1095	9.01637	8.30939	8.97949	8.95338	8.79253	8.89783	9.2724	9.2923	9.20464	9.0763	8.84073	8.98412	9.50771	8.67133	8.97065	8.95338	8.92003	9.00453	9.015	9.35614	8.92684	9.39856	8.2105	8.17504	8.83997	8.76722	8.66692	8.91243	8.60202
ZNF222	4.49617	5.47142	5.30472	5.62882	6.46138	5.37219	5.78215	5.9637	4.33383	5.89469	5.75635	6.06644	5.56362	6.19273	5.68895	6.53142	6.08195	5.88815	5.94578	5.26533	6.36314	4.63879	5.62441	6.19967	5.7331	5.43354	5.68278	5.77176	5.86652	5.47024	5.22234	6.66428	6.70256	5.63198	6.1514	5.44197	6.11025	5.40724	5.57807	5.94312	5.46336	6.19708	5.10033	5.22332	5.27379	6.27893	5.54802	5.61145	5.32211
ZNF22	10.8946	10.8432	10.6745	10.6887	10.9467	10.9263	10.6536	11.176	10.8208	10.612	10.6928	10.6984	10.5328	10.7534	10.8946	10.8528	10.9385	11.0713	10.9815	10.7862	10.5056	10.2694	10.7601	10.5472	10.6751	10.9213	10.9598	10.6338	10.6745	11.0996	10.7085	10.9679	10.9578	11.0814	11.2728	10.8735	10.9159	10.5168	10.5896	10.9404	11.0345	11.0443	10.1174	10.2776	10.8453	10.7553	10.6928	10.6003	10.6506
ZNF219	9.65665	9.67554	10.0452	9.69894	9.80918	10.3114	9.68343	9.18514	9.81303	9.75889	9.77852	10.001	9.9393	9.85011	9.95449	9.57734	10.2466	10.0812	10.5449	10.4159	10.4414	9.55477	9.71444	9.7869	9.92321	10.5065	10.1424	10.1296	10.0703	10.1505	9.80526	9.70947	10.1186	9.624	10.2259	9.82383	9.99776	9.74399	9.57526	10.0459	9.95844	9.77852	10.2832	9.18093	10.2624	9.87901	10.1277	10.2009	10.3012
ZNF217	9.62792	9.49427	9.93642	9.86513	9.79188	9.46545	9.38581	10.0001	9.80589	9.42453	9.74012	9.99536	9.52678	9.91377	9.41612	10.1211	9.72842	9.79188	9.92092	9.78724	9.27039	9.66239	9.62436	9.67652	9.86608	9.39966	9.53352	10.7118	10.0214	9.37815	9.79823	9.97608	10.3755	9.57328	9.27769	9.24619	9.83232	9.76909	9.64335	9.66622	9.6106	9.71843	9.07313	9.70034	9.83439	9.86787	9.76391	9.62181	9.67482
ZNF215	4.79049	5.90987	5.16334	6.0867	5.24365	6.08917	4.95529	4.02636	5.48061	6.94108	5.23644	4.27977	5.83481	4.56568	4.77488	4.95295	5.67594	4.37957	4.7964	5.54746	4.98566	6.75624	5.17042	6.09334	6.48677	4.3432	5.3403	4.79513	5.73799	4.39418	4.94886	6.73166	4.09814	5.63714	5.03832	5.58152	4.74902	4.85236	6.46398	3.63885	4.26373	6.4532	4.75825	8.37141	5.03832	5.7581	4.85461	5.72341	5.0522
ZNF214	6.94979	4.64162	5.40931	5.30812	4.10302	5.00472	4.94431	3.78646	5.62734	4.01445	5.01337	5.21572	4.05788	5.06218	5.41856	3.50359	5.26673	5.23268	5.55417	4.59921	4.95932	5.00249	4.9207	2.53952	5.26555	5.16668	5.63724	5.10107	4.93059	4.50302	5.83523	5.23827	3.23904	5.77452	5.17181	5.28552	5.15776	4.84539	5.00154	4.78479	5.22307	5.03881	4.46693	5.38766	5.56128	4.68285	5.11648	5.04177	4.93059
ZNF212	9.11953	8.88837	9.1835	9.04971	8.86726	8.70756	9.09185	8.6478	9.05684	8.58179	9.01801	8.9853	8.66201	9.00832	9.01905	8.08163	9.18002	8.80515	9.12393	9.35164	9.02419	8.40023	9.04416	8.70985	9.17047	9.26479	9.04878	9.16786	9.35164	8.91295	8.87649	8.94499	8.86726	8.3853	9.41772	8.8929	9.11642	9.33968	9.06004	9.21858	9.25406	9.026	9.32085	8.49886	9.01851	8.8787	9.17663	9.11226	9.26072
ZNF211	8.30654	8.32608	8.27278	8.5726	7.982	7.53604	8.14528	7.75228	8.35452	8.01702	8.21251	8.01556	8.02558	8.17885	8.45938	7.97823	8.1782	8.30333	7.92843	8.75816	8.32237	7.24888	8.29404	7.94793	7.82321	8.4065	8.42027	7.82095	7.77323	8.14417	8.10792	8.18487	7.92372	8.38227	8.54807	8.00706	8.56662	8.36031	8.15325	8.43138	8.31503	8.33787	7.92007	7.86912	8.37057	8.33483	8.16182	7.97515	8.11689
ZNF207	10.1497	10.4381	10.5124	10.5695	10.9584	10.5818	10.6605	11.082	10.3378	10.7506	10.9329	10.4232	10.8493	10.7488	10.5011	11.0037	10.3858	10.6694	10.3627	10.5133	10.4434	10.6914	10.7229	11.121	10.5786	10.4172	10.5728	10.5483	10.6037	10.4989	10.2426	10.4759	11.1904	10.7521	10.4039	10.7473	10.4783	11.0005	10.9915	10.3835	10.6001	10.6364	10.7934	11.105	10.3883	10.4051	10.6166	10.665	10.5175
ZNF205	6.44431	7.13552	7.90933	6.83416	7.64429	8.54518	8.1686	6.67241	6.9057	7.53382	7.58859	7.74438	8.38374	7.43206	6.87038	7.06114	9.17041	7.71977	7.62012	8.60598	7.81233	7.63728	7.47368	7.51651	7.65442	7.93737	7.75171	8.29197	7.99003	8.28572	6.99368	8.01307	7.56865	7.05853	7.90517	7.23846	7.33895	7.77595	8.48479	7.81526	6.92317	6.34761	8.76151	8.69565	8.37135	7.80084	7.87469	8.31903	8.26797
ZNF202	4.96688	5.11934	5.26642	5.35644	5.60303	4.74795	5.45055	6.72464	5.13257	5.41261	5.21495	4.84352	4.96688	4.90321	4.98467	5.24555	4.96688	4.88623	5.41156	5.61439	5.69914	4.99978	5.53691	5.71811	5.1707	5.37617	5.2379	5.28276	5.31779	5.07238	5.1637	5.32124	5.85279	4.89781	6.33461	4.61051	5.21297	5.94363	5.46161	5.23278	5.10911	5.33385	5.03851	4.99758	5.19102	5.03851	5.69967	5.21615	5.17602
ZNF200	7.8437	8.20917	8.18662	8.45258	8.08561	7.7449	8.30688	8.47879	8.06166	8.51857	8.40738	8.40169	8.22053	8.36242	7.90543	8.41544	8.08339	8.05435	8.10862	8.18966	7.75894	8.03648	8.32242	8.43887	7.98394	7.77879	8.12533	8.31222	8.18376	7.90705	8.02528	8.72924	8.60326	8.19036	8.12195	8.17482	8.33869	8.2314	8.51485	8.41718	8.05671	8.48975	7.99729	8.2045	8.18966	8.45485	8.14377	8.1169	7.6308
ZNF20	8.37254	7.10956	7.48215	7.15706	6.77999	6.98407	7.04013	6.78213	7.38661	6.74391	7.4282	7.35075	6.21514	7.39732	7.54288	6.42281	7.2107	7.30887	7.03182	6.91148	7.38774	6.80066	7.21329	6.89753	7.06296	7.48387	7.71794	7.14529	7.0823	7.29104	7.40329	7.28974	7.26334	7.4282	7.05743	6.85324	7.68945	7.24677	6.81233	7.05204	7.42295	7.17593	6.83759	7.53855	7.30237	6.87286	7.37002	6.97381	6.85324
ZNF2	7.33228	7.58193	7.46476	7.63022	7.89848	7.81533	7.65064	7.31685	7.41008	7.75789	7.124	7.88357	7.87016	7.50373	7.05177	7.85837	8.36993	7.40784	7.97404	6.64169	7.30427	8.21288	7.64925	7.81385	7.53271	7.50554	7.11853	8.48271	7.8127	7.76689	7.43316	7.61246	8.18265	7.0692	7.59217	7.24081	7.42756	7.97013	7.55916	7.52518	7.15002	8.14903	7.64676	7.32351	6.98093	8.16643	7.44449	7.70598	8.2653
ZNF195	7.3637	8.24372	8.34359	8.10733	8.51129	8.40878	8.56614	8.33574	8.48986	8.12809	7.89017	7.88036	7.99336	8.29377	8.20143	7.86505	8.07742	8.28352	8.27584	8.74086	8.13858	7.95741	8.2958	8.5753	7.91056	7.12663	8.34933	8.14227	7.73801	8.22066	8.2975	8.05925	8.90728	8.25126	8.79814	8.48426	8.21481	8.31486	8.44106	8.32639	7.61008	8.27971	6.90661	8.3979	8.55356	7.93331	7.89677	7.736	7.33663
ZNF193	8.37415	8.1569	8.33977	8.54081	8.29253	7.95772	8.20368	8.14468	8.62377	8.32796	8.01163	8.35837	8.30081	8.31388	8.27829	7.75827	8.30635	8.27684	8.50083	8.28448	8.57843	8.01137	8.19937	8.19852	8.40967	8.39902	8.55037	8.51678	8.43466	8.32624	8.37703	8.18383	8.71783	8.13016	8.95155	8.2375	8.43798	8.34845	8.56725	8.50367	8.36524	8.66339	8.0111	7.86188	8.32696	8.22404	8.36202	8.24343	8.35006
ZNF189	8.99124	9.03531	8.88275	9.1978	10.1872	9.4607	8.80581	9.62645	9.20772	9.54486	9.02915	9.09991	9.13012	9.0761	9.41118	10.4429	8.97997	8.99279	9.15915	8.75044	9.19862	8.5677	9.34116	9.51278	8.75098	9.08422	8.97191	8.9782	9.02849	8.75829	8.93753	8.92956	9.68751	9.33309	9.35511	8.92571	9.07663	9.14408	9.29505	9.11215	8.82776	9.26786	8.37066	9.54312	9.10814	9.1147	8.99434	9.0945	8.64896
ZNF187	8.38913	8.62933	8.21111	8.69384	8.01511	8.35535	8.32402	8.00019	8.55362	8.09472	8.33991	8.25856	8.3572	8.2924	8.51196	7.43138	8.6299	8.44474	8.45555	8.54839	8.77616	8.4001	8.42083	7.91008	8.42021	8.32888	8.38456	8.30416	8.33261	8.56063	8.55618	8.87482	8.27107	8.06289	8.63805	8.39945	8.63302	8.48706	8.41341	8.59975	8.7386	8.44662	7.99148	7.44332	8.08223	8.27202	8.32702	8.03949	8.44956
ZNF185	8.63384	8.54144	9.17708	8.28704	8.47958	8.0417	8.88813	8.48499	8.40027	8.68176	9.39237	9.063	8.05452	9.32042	8.83551	9.05554	8.12635	8.83237	8.6166	9.47687	9.48067	8.7383	8.28284	8.38802	8.7573	9.53038	9.65051	8.99782	8.77458	8.43381	8.8211	7.9477	8.07438	8.99609	8.61756	9.07361	9.08573	8.10014	9.29359	9.2386	8.87546	8.80386	9.29559	8.47711	8.57852	9.06946	9.30693	9.21085	9.05607
ZNF184	6.89926	7.20232	6.71816	6.75309	6.65053	6.44665	6.65089	6.34804	6.57768	6.86598	6.75493	6.6885	7.01667	6.9719	6.86364	6.03872	6.73886	6.99754	6.58218	6.97836	6.80042	6.24444	6.85074	6.13069	6.68503	6.48736	6.90615	6.42505	6.38966	6.79034	6.53452	7.16998	6.46553	6.47805	7.46539	6.72289	7.1789	6.79381	6.88328	6.89547	6.41077	6.93896	6.45066	6.56173	6.88295	6.88571	6.90576	6.39421	6.45066
ZNF182	8.80519	8.61856	8.71383	8.85572	7.86184	8.06349	8.26126	7.62825	8.46597	7.84665	7.90031	8.88015	7.8161	8.75156	8.59772	7.37771	8.38941	8.80069	8.80519	8.17438	8.60614	8.60057	8.55017	7.98271	8.69576	8.09587	8.6433	8.7172	8.2921	8.40819	8.99178	8.97682	8.37834	8.54322	8.63901	8.43657	8.79823	8.25145	8.22951	8.3432	8.3304	8.77182	6.34223	7.64473	8.42999	8.52504	8.41114	8.51655	7.88248
ZNF181	6.38614	6.48751	6.16514	6.40934	6.43741	5.61003	6.00815	6.21674	6.49831	6.54448	6.51745	6.34134	6.00772	6.37902	6.49006	6.42745	5.81672	6.44178	6.21831	6.14621	6.49954	5.3326	6.28936	6.0544	6.02015	6.12025	6.85819	6.03353	5.79028	6.21249	6.47979	7.02953	6.43784	6.55414	6.7441	6.38694	6.74619	5.75648	6.29205	6.49638	6.3845	6.81936	4.95883	5.49365	6.75998	6.55647	6.18225	5.95195	6.10955
ZNF18	9.02252	9.1106	9.06264	9.23179	8.58868	8.9338	9.02471	8.39106	9.13077	8.74273	9.00946	9.01651	8.98842	9.18248	8.99144	8.33682	9.08351	8.86742	8.84884	8.98954	8.91714	9.05293	9.20963	8.73729	9.07323	8.91714	9.04058	8.87297	8.81021	8.86958	8.98572	9.1863	8.64585	8.65815	8.8552	8.84114	9.05554	9.44458	9.34799	8.963	9.09631	9.31969	9.04542	8.60748	8.95023	8.95974	9.02686	9.01574	8.99457
ZNF177	8.36099	8.25081	8.24714	8.03008	7.09563	7.6819	7.95103	6.33809	8.2025	7.90956	7.62184	8.23884	6.92002	8.09359	7.88173	6.25959	8.17651	8.62036	7.76729	8.42666	8.37175	7.47832	8.08015	7.07793	8.38456	7.9964	8.09654	8.10977	8.23712	8.21141	8.4061	7.9964	7.48252	7.78434	8.07006	8.03934	8.18116	7.85805	7.80128	8.44259	8.18274	7.8357	6.58879	6.47917	8.36461	7.89647	8.20578	8.14578	8.04452
ZNF175	7.8151	7.89054	7.6567	7.74544	7.66493	6.9111	7.40918	7.46667	7.45836	7.54801	7.68181	7.33579	7.1784	7.64248	7.79212	6.76137	7.54368	7.53753	7.23831	7.34683	7.61122	6.84834	7.66978	7.15279	7.39369	7.51506	7.86647	7.48296	7.26828	7.19156	7.53633	7.71427	7.45138	7.40622	8.22411	7.53106	7.81955	7.46871	7.33579	7.61122	7.70184	7.35374	7.05343	7.0054	7.78694	7.57868	7.58072	7.30625	7.41636
ZNF174	7.00134	6.49558	6.35441	6.1985	6.02916	5.7214	6.17659	6.16996	6.5841	5.66887	6.71609	6.37514	6.21712	6.4406	6.61628	5.40931	6.10311	6.57684	6.81617	6.56233	6.67109	6.11075	6.47166	5.58317	6.0845	6.91568	6.8827	6.61719	6.49877	6.41473	6.46932	6.58485	5.97448	6.07859	6.60489	6.43746	6.48759	6.42998	6.53875	6.76258	7.01646	6.68316	6.55196	5.22266	6.40968	6.47669	6.57297	6.42286	6.72397
ZNF17	8.5416	8.75256	8.03723	8.42868	8.43368	7.68331	8.24124	8.593	8.39021	8.289	8.49197	8.19339	8.12647	8.27293	8.5622	7.93175	8.09189	8.30685	8.22584	8.51589	8.22943	7.9772	8.27319	8.11734	7.95423	8.26762	8.58038	8.05127	8.0341	8.20828	8.36798	8.50405	8.39144	8.48444	8.71141	8.65704	8.33131	8.3131	8.46521	8.27446	8.46975	8.4352	7.71673	8.10327	8.22109	8.28248	8.07031	7.96077	7.93246
ZNF167	7.05781	6.99293	7.20221	7.37315	6.40502	7.82115	7.10303	6.15064	7.40749	6.26474	6.9511	7.31041	6.69528	7.32125	6.95834	5.07091	7.34724	6.47557	7.76555	6.91312	7.17762	7.52503	7.48539	6.76131	7.31041	7.17381	7.02452	7.54779	7.42707	7.10965	6.8703	6.65609	6.45232	6.0528	6.75371	6.6246	7.19419	7.16034	6.99559	7.28831	7.54263	7.34109	6.82526	5.57847	7.17635	6.38716	7.26983	6.99881	7.09456
ZNF165	8.55158	8.50321	8.00457	7.8813	9.33779	8.66022	8.11783	9.83933	8.11261	8.579	7.36671	8.20952	8.3423	7.56286	8.47951	9.97918	7.26763	8.03657	8.09432	8.33545	8.03831	8.9289	7.53108	8.68516	8.13199	7.50582	7.80971	7.81583	7.43163	7.0359	8.13427	7.69569	9.65717	9.29053	8.37683	8.08445	8.46405	7.53828	7.87092	7.63696	8.20825	8.29685	7.09866	9.84196	8.08237	8.13591	7.66738	7.91945	7.43787
ZNF160	5.73243	7.1281	6.09908	5.72358	6.59478	5.58635	5.85308	5.57183	6.75799	6.45187	6.98736	6.7174	7.00695	5.0569	6.79644	6.30429	6.6084	4.76844	6.73505	5.96894	5.48801	5.66953	5.4967	6.96234	6.4498	6.20532	4.36084	5.0088	4.75955	5.79026	6.88545	6.32309	6.70142	6.77369	5.12624	5.30309	6.82281	7.35283	6.64318	6.22026	5.57773	6.71955	6.53987	6.8085	6.77947	5.00237	5.78062	5.17811	5.59858
ZNF16	7.25741	7.28698	7.27149	6.79338	7.31767	7.37622	7.27648	7.42392	7.50594	7.38884	7.54126	7.34164	7.13628	7.27727	7.3523	6.46041	7.46621	7.31972	7.2711	7.66359	7.3169	6.96893	7.4133	7.42027	7.0729	7.42979	7.66587	7.37429	7.61139	7.47316	7.33239	7.70353	7.2782	7.02955	7.99534	7.4524	7.19963	7.38723	7.50698	7.4444	7.46953	7.28533	7.88333	6.60021	7.30989	6.99294	7.43192	7.76399	7.47986
ZNF155	5.14574	5.60049	5.95673	5.8924	6.01574	5.82812	6.02914	5.68774	5.06564	5.39605	5.83961	6.24951	5.67547	6.49272	5.70629	5.15185	6.48428	6.372	6.32436	6.2078	5.73555	4.88511	6.12217	6.17403	5.91009	5.81216	5.81134	6.53195	6.25181	5.99223	5.77073	5.99946	6.45494	5.67713	6.10586	5.72347	5.94096	5.5759	5.81882	6.65526	5.39973	6.19641	5.59659	5.27348	5.66527	5.91342	5.9969	6.43271	5.84131
ZNF146	8.86392	9.46618	9.08525	9.69863	9.46384	9.08197	9.04824	9.7356	9.12168	9.21063	9.25442	9.20306	9.25263	9.16795	9.39535	9.23374	8.80319	9.51588	8.9561	9.10621	9.01416	9.08968	9.32119	9.71618	9.00586	8.49616	9.20542	9.23719	8.76332	9.1861	9.2945	9.73664	10.0126	9.57153	9.39186	9.79096	9.33424	8.86748	9.2905	9.11361	9.19609	9.85915	7.45961	9.30493	9.22787	9.27747	8.71	8.91692	8.17936
ZNF143	8.30536	8.54601	8.64436	8.5609	8.85924	8.60484	8.66325	9.0874	8.41049	8.57001	8.74519	8.87925	8.75226	8.87114	8.56328	8.53164	8.57091	8.78588	8.67258	8.33113	8.44752	8.38006	8.57788	8.83428	8.57294	8.64875	8.56034	8.78707	8.65438	8.72107	8.69305	9.0863	8.81358	8.57091	8.88506	8.4538	8.85575	8.54707	8.56875	8.90105	8.64696	8.89993	8.15957	8.33543	8.47913	8.94564	8.69514	8.384	8.43291
ZNF142	8.70074	8.76805	8.62748	8.51953	8.78052	8.67443	8.57929	9.07155	8.89188	8.43012	8.73886	8.87888	8.3203	8.60171	8.72129	8.66273	8.86891	8.41601	8.91553	8.46552	9.18944	9.16203	8.62012	8.87023	8.73836	8.9042	8.72623	9.20659	9.17504	8.51859	8.78261	8.53783	8.7912	8.46737	8.76561	8.54976	8.68497	9.49142	8.92039	8.74212	9.02539	8.95269	9.06189	8.46167	8.28853	8.72254	8.85373	8.84928	8.84004
ZNF141	4.31251	5.21331	5.32612	5.00105	5.84051	5.27948	5.81274	5.01922	4.8779	5.02879	5.00669	5.61031	5.21765	5.43453	5.06958	5.02354	5.6251	5.60482	5.87805	4.7848	5.0243	4.59862	5.11914	5.46536	5.52836	4.92759	5.36244	5.57799	5.33035	5.24333	5.37587	5.79467	5.93194	5.21447	5.61959	5.15426	5.67272	4.89007	5.50498	5.61106	4.70819	5.61752	4.49431	4.91433	5.45336	5.36931	5.07754	5.51696	5.16322
ZNF14	10.2964	10.8843	10.658	10.6054	10.8462	10.3805	10.5981	10.4877	10.7184	10.5121	10.5882	10.6824	10.1623	10.7152	11.1126	9.8486	10.9418	10.7395	10.87	10.7015	10.6196	9.69038	10.7094	10.3857	10.5026	10.4315	11.0442	10.5533	10.3888	10.6166	10.6785	10.7382	10.419	10.3296	11.1281	10.6297	11.0107	10.2808	10.306	10.5362	10.1399	10.5859	9.67531	9.45711	10.8686	10.6044	10.5453	10.3843	10.125
ZNF138	5.71127	6.46699	5.92074	5.84622	5.54266	6.20594	6.70125	4.74204	5.09625	5.24711	5.51548	5.8719	5.4695	5.76467	5.76656	5.71368	5.70866	6.21163	5.92592	5.81937	5.79391	6.35773	5.96115	5.02111	6.25457	4.83598	5.45432	5.8043	5.06134	5.53183	6.45578	6.58739	5.01135	5.54088	5.55308	6.09341	6.88531	5.83328	6.26634	6.138	5.30657	6.23646	4.53446	5.48612	5.56789	5.87905	5.68614	5.1319	4.22055
ZNF136	7.65274	7.89412	7.721	7.94098	7.88292	7.20858	7.72418	8.20584	8.05184	8.10052	7.79462	7.58436	7.92092	7.72358	8.23023	8.03075	7.89598	7.99857	7.65736	7.86126	7.47179	7.16645	7.97811	7.52598	7.77114	7.60238	7.48877	7.62645	7.46972	7.94263	7.88471	8.16277	8.12082	7.74378	7.93829	8.20925	7.83888	7.21193	8.1591	7.79462	7.42886	8.23068	7.1348	7.49157	8.18853	8.0244	7.80819	7.51178	7.5447
ZNF135	7.92419	8.25366	7.60368	7.92516	7.40541	7.86077	7.52857	7.00665	7.90189	7.7059	7.46756	7.81721	7.46266	7.74947	7.91589	6.67826	8.30271	8.02203	7.99503	7.86699	8.3473	7.28164	7.78141	7.34226	8.1776	8.2889	7.08127	8.01136	7.84293	8.16653	7.97554	8.26973	7.2982	7.28091	8.17567	7.78378	7.68816	7.25815	6.32894	8.17227	8.05817	7.58561	7.4668	6.29351	7.80946	7.91589	7.86875	7.86077	8.01776
ZNF134	7.12539	7.02027	7.06016	7.06914	7.45062	7.00061	7.2082	7.72082	7.24301	7.33173	7.36034	7.06389	7.01349	7.34071	7.25348	7.65331	7.35976	7.12178	7.08965	7.58028	7.14727	6.98488	7.22513	7.537	7.15165	7.33111	7.12087	7.23532	7.32819	7.15231	7.03859	7.27508	7.47379	7.16999	7.48884	7.0403	7.22322	7.62646	7.40115	7.23722	7.26112	7.38871	7.45718	6.85911	6.98618	7.01855	7.2889	7.24886	7.35831
ZNF132	6.07655	5.12995	6.23107	6.07574	5.72536	5.04578	6.15267	5.61611	6.28182	5.44239	6.25098	5.7234	5.41293	5.67723	5.91848	4.53585	5.68579	5.75358	5.88311	5.7748	5.80811	4.33666	5.88597	5.59866	5.31269	6.3373	6.37687	5.60253	5.716	5.5591	6.24075	5.61811	5.33484	5.88065	5.82773	5.6692	5.97686	6.32027	5.84827	5.78071	6.03198	5.74678	6.44504	5.17796	6.31778	4.98713	6.2954	5.51269	5.70201
ZNF124	4.85098	6.24033	5.9833	5.83261	6.30261	5.70299	5.75428	6.01494	6.02965	5.75612	5.57419	6.04624	5.50033	6.52041	5.50732	5.70048	6.10734	5.16103	6.83082	4.90015	5.79578	5.74635	6.18779	6.1436	5.84555	5.24746	5.53357	6.29157	6.28311	5.87563	5.76422	5.74997	6.27783	5.11677	6.15937	5.1183	6.17168	5.56039	5.49266	6.22155	5.97177	6.31047	4.75208	4.86653	5.42573	5.61138	6.00573	5.1791	6.21058
ZNF121	3.01445	4.57552	2.84259	4.16818	5.01068	4.82441	4.41248	5.46623	3.80181	4.2935	4.45173	4.30518	5.32008	3.9185	3.67244	5.05267	4.18615	4.59936	3.9433	4.24145	3.89791	3.54288	3.45094	5.38088	4.02303	2.15662	1.28467	3.2882	3.94805	4.39036	3.79981	5.22825	5.62119	4.26254	4.37917	5.01773	4.28995	4.39193	5.16651	3.37623	3.99121	4.89482	4.07934	5.27906	3.40168	4.71476	3.41926	4.19209	3.65285
ZNF12	8.49853	8.53293	8.61994	8.47783	8.7869	8.27259	8.57317	8.70982	8.53634	8.58326	8.24592	8.32534	8.43279	8.28599	8.65183	8.38151	8.37799	8.81336	8.49125	8.68009	8.48617	8.14231	8.51475	8.37666	8.57071	8.62988	8.45933	8.3782	8.28742	8.56903	8.73551	8.42955	8.73859	8.8305	9.16189	8.50865	8.63708	8.27639	8.60903	8.64843	8.3823	8.76967	7.78696	8.31004	8.78745	8.43279	8.49125	8.11357	8.36274
ZNF114	2.39061	3.29938	2.80498	4.36129	2.26457	4.52668	4.69229	2.19368	5.20573	2.74584	5.54908	4.51133	2.26688	4.81725	4.48219	2.56171	4.04042	3.62755	4.89005	4.58462	5.15011	3.16785	3.031	2.56171	1.98173	4.31538	4.2903	3.85466	5.74699	4.52668	3.59616	4.88459	2.63111	3.19783	4.58595	4.65521	4.56701	4.22592	3.31424	4.96433	4.71146	4.06315	3.56822	2.21291	4.43591	4.11085	3.56615	3.80106	5.45234
ZNF107	5.44654	6.15889	5.96382	5.70722	5.54271	5.98363	6.03999	4.98228	5.37846	5.49877	5.25639	5.82107	6.02022	5.53567	5.44012	5.16414	5.93526	6.3907	6.1165	5.75691	5.35716	5.87586	5.71089	5.13663	6.19005	5.39782	5.51882	6.0222	5.41077	5.58879	5.50211	6.60503	5.37263	5.68968	6.03938	5.99252	5.87715	5.76419	5.93495	5.61892	4.99991	5.93024	4.56107	5.80047	5.94238	6.17645	5.30877	5.29861	4.64528
ZNF101	6.84269	7.63619	7.0343	7.30023	7.40818	6.89513	7.73937	7.12982	7.11028	7.27315	7.24691	7.37679	7.72598	7.00793	7.01945	7.34326	7.3737	7.1723	7.37922	7.0788	6.75741	7.86501	7.66687	7.56581	8.19566	6.53886	6.8905	7.22479	7.09789	6.99428	7.49614	7.4395	7.19867	7.40022	7.05828	7.41629	7.41871	7.9599	7.84119	7.37555	6.95318	7.81078	7.57742	7.6984	6.92752	7.65174	7.10622	7.31007	6.48044
ZNF10	8.25473	9.06445	8.29297	8.44825	8.49707	8.07023	7.9471	7.86518	8.16538	8.69058	7.46065	7.72336	8.41804	7.97259	8.34	7.37895	8.63239	8.08641	8.02897	8.05607	8.14593	8.09815	8.03333	7.73371	8.84762	7.4541	8.12465	7.98555	7.60505	7.94134	7.89278	9.16829	8.25693	8.05245	8.96373	8.36387	8.27255	7.49019	8.66974	8.03012	7.70014	7.94327	6.81608	7.76589	8.62906	8.25609	7.63454	8.40311	7.90839
ZMYND8	8.40547	7.99432	8.13912	8.28106	8.29365	8.2213	8.19492	8.13054	8.05663	7.52604	8.40448	8.05663	8.61734	8.32576	8.3129	7.82745	7.67057	7.99432	8.51913	8.15772	7.74441	8.06116	8.27664	7.35183	8.802	8.43525	8.22262	8.59846	8.08308	8.15113	7.88236	7.8768	8.05395	7.616	7.94434	8.17481	7.45459	8.1917	8.89937	8.20872	8.26468	8.06039	8.74672	8.47508	8.20676	7.74082	8.40416	7.78566	8.49335
ZMYND19	7.45115	7.53776	7.61933	7.81501	8.03705	8.357	7.56404	8.61678	7.71841	7.58871	7.57194	7.39181	7.72418	7.46222	7.57009	7.56272	7.45115	7.30813	7.51883	7.19339	7.68216	8.03541	7.58812	8.0454	7.54667	7.61687	8.09816	7.66377	7.44767	7.51436	7.48156	7.22714	8.02505	7.52195	7.94483	7.58491	7.54462	7.97024	7.9211	7.57565	7.642	7.59951	7.90938	7.88945	7.43041	7.42739	7.89833	7.38588	7.97397
ZMYND17	3.83199	2.70356	3.34508	2.72964	2.80721	2.71444	2.70141	2.67153	2.74519	2.76579	3.98986	2.75553	2.6724	2.74766	2.70235	2.74052	2.67828	3.97638	3.12573	2.81686	4.31247	2.67197	3.34508	4.15375	2.68404	4.27023	2.8722	2.60846	3.59686	3.62751	3.03026	4.7002	2.63098	2.63301	4.22574	2.68213	2.68213	2.74884	2.61211	2.70563	3.30811	4.68919	2.6306	2.64049	4.37372	2.65401	2.70563	3.4043	4.86258
ZMYND15	8.27748	9.92141	10.2493	10.2317	9.28481	9.88951	10.0426	9.30027	10.117	9.94621	10.7896	9.54798	9.96063	10.9075	9.43176	9.09574	9.68421	9.97839	10.1391	9.62064	9.75533	9.45094	9.97347	10.0294	9.53276	9.71067	9.99687	10.4948	10.4958	9.93129	10.2447	8.93474	9.66848	9.58325	9.59239	9.95675	9.66123	10.7376	10.5724	9.61525	9.64566	10.0853	10.3256	9.35671	9.72716	9.52536	10.5199	9.93584	10.2429
ZMYND12	9.73791	6.72918	8.24067	7.60546	6.11627	6.77016	6.92735	6.93725	7.64167	6.54103	7.09026	6.85878	6.06999	6.77321	7.61342	5.99705	6.41706	6.67372	6.6361	6.80543	6.76158	7.73	6.48134	5.78997	8.05572	6.8876	6.4797	6.60915	6.71124	6.22757	8.56084	6.57161	5.99261	8.30151	5.55393	6.94964	6.75127	6.9433	7.53485	6.12519	7.68423	6.55129	7.17886	9.33426	7.36843	6.44764	6.58219	6.75389	6.43318
ZMYND11	9.62877	10.4155	10.0754	10.5097	10.6319	10.4391	9.87643	10.3414	10.4653	10.0032	9.94422	10.287	10.5812	10.076	10.4812	10.7236	10.5472	10.0249	10.7504	9.89148	9.87097	9.97434	10.0599	10.1489	9.6579	9.96939	10.5006	10.5417	10.0197	10.5555	10.1656	10.1617	10.8157	10.0414	10.639	10.196	10.1313	9.27201	9.92906	10.2767	9.67639	10.1267	10.1205	10.2264	10.3297	10.3696	9.90317	9.73707	10.2856
ZMYND10	11.2486	5.54174	8.61965	7.9761	6.18882	4.0856	4.85811	6.83545	8.50404	5.90372	5.34706	5.10268	4.52897	6.12963	8.46563	5.04247	4.86473	7.23439	5.50067	6.73742	4.80531	7.54672	4.71684	6.23198	8.84669	7.88274	6.28791	6.74686	4.58209	6.11752	9.48029	3.93947	5.10695	8.95244	6.26369	7.02632	6.56431	5.37373	5.50871	4.24325	8.98347	5.67697	5.03333	10.2555	8.91738	5.87729	5.63824	5.67292	4.2018
ZMYM6	9.01313	9.68875	9.32356	9.57517	9.40354	9.38671	9.54068	8.9685	9.60024	9.30782	9.53099	9.18021	9.88044	9.54677	9.3458	9.13631	8.96295	9.34541	9.3377	9.42597	9.29109	9.23377	9.36151	9.1871	9.10371	8.71716	9.53591	9.08526	9.04235	9.42921	9.43082	9.44701	9.3889	9.60204	9.63616	9.52215	9.39637	9.71313	10.0417	9.04429	9.13789	9.60472	8.88657	9.39552	9.73765	9.35275	9.34677	9.16457	9.25142
ZMYM5	6.54841	6.74065	6.14387	6.56022	6.65648	7.31101	6.94358	6.72766	6.82692	7.12093	6.92482	6.90146	6.97954	6.81119	6.67856	7.62072	6.68231	6.60583	6.82996	6.76677	6.83498	7.37463	6.73612	7.43331	6.14501	6.43615	6.88196	6.88905	6.65648	6.60583	5.80291	7.40125	7.0229	7.10768	7.11839	6.9713	6.72696	6.677	7.21861	6.74562	6.54494	6.92346	6.76842	7.12353	6.45629	6.94191	6.88661	6.97477	7.29758
ZMYM4	9.04415	9.50228	9.45027	9.48151	9.39933	9.89982	9.4616	9.48714	9.19041	9.27578	9.14014	9.5651	9.30838	9.53364	9.38116	9.0879	9.59187	9.66943	9.54913	9.40379	9.34496	9.73126	9.39339	9.7815	9.47229	9.32336	9.28301	9.68345	9.77427	9.40718	9.27116	9.55996	9.6439	9.0707	9.4785	9.30682	9.44558	9.34034	9.18796	9.4827	9.14702	9.55435	8.80916	8.96133	9.25104	9.23403	9.43483	9.35286	9.30227
ZMYM3	9.1543	8.50156	8.85948	8.89707	7.70087	7.81271	8.50345	7.12445	8.78967	8.03195	8.83765	8.45287	8.40225	8.33501	8.35943	8.24939	8.04739	8.38948	8.13612	8.99939	9.10479	8.30575	8.78503	7.5097	8.37442	8.76556	8.86487	8.32624	8.38669	8.83037	8.66125	8.43191	7.38396	8.44962	8.28102	8.56491	8.53405	9.32299	8.49453	8.39138	8.94303	8.36783	9.09488	8.08594	8.60175	8.22256	8.8049	8.17655	8.96776
ZMYM2	9.3966	9.41379	9.46923	9.51021	9.33619	9.38041	9.08559	8.65539	9.29306	9.33619	8.93497	9.26297	9.62028	9.27415	9.15706	9.57052	9.18204	9.47049	9.45386	9.14283	9.08559	9.63696	9.42747	9.09461	9.06192	8.88265	9.21916	9.05581	9.09282	9.17783	9.36366	9.62648	9.36823	9.48862	9.33686	9.40569	9.45764	9.36237	9.54151	9.16756	8.93666	9.57742	8.0602	9.57555	9.37042	9.64492	9.23172	9.11766	9.0294
ZMYM1	8.26153	8.54307	8.46561	8.30606	7.76116	8.16905	8.13712	7.85903	7.98358	7.97443	8.12693	7.93882	7.71111	7.97293	8.14206	6.96547	8.38316	8.3675	8.06531	8.33328	8.35557	8.017	8.01481	7.59876	7.92551	8.09875	8.11186	8.11444	7.63646	8.16394	8.31877	8.44081	7.47779	7.93133	8.46029	8.22079	8.20259	8.00377	8.01769	8.15391	7.91647	8.12497	6.92329	7.07874	8.01087	8.22132	8.09026	7.96329	7.64094
ZMPSTE24	12.1455	11.8714	12.1088	12.0733	11.7776	12.3066	11.9626	12.0934	12.0884	11.9492	12.3954	11.6434	12.329	12.1619	12.2317	11.7125	12.047	11.8256	12.0144	12.4843	11.9577	12.0343	12.3497	11.9937	11.9788	11.8077	12.1977	12.1193	11.7942	11.976	11.9902	11.6937	11.7205	12.0315	12.1559	12.0508	11.9182	11.9596	12.1956	11.9437	12.0526	11.9474	11.5821	12.016	12.2638	11.8005	11.8324	11.9788	12.0596
ZMIZ2	10.2304	10.1898	10.4072	10.3599	10.1864	9.86268	10.6093	10.4366	10.075	10.2927	9.39241	10.9145	10.225	10.3247	10.3756	10.226	10.3894	10.5784	10.7307	10.8237	10.2468	10.2895	10.894	10.0925	10.3404	10.4494	10.4809	10.1864	10.4947	10.4307	10.5102	10.1558	10.3404	10.2196	10.3871	9.71016	10.5691	10.8833	10.2869	10.3588	10.2523	10.4328	10.1979	10.2818	10.4201	10.7322	10.6874	10.7546	10.0283
ZMIZ1	12.0066	12.0489	11.9978	12.0786	11.9988	11.9767	11.945	12.1686	12.0334	11.9988	12.416	12.4861	11.7779	12.4666	12.1803	12.1936	12.1936	12.3297	12.3285	12.0874	11.9988	11.734	12.1853	12.2565	11.8844	12.4203	12.5258	12.2529	12.1445	12.4079	11.945	12.2024	12.248	11.7801	12.0431	11.9889	12.2878	11.8792	11.669	12.5837	12.3188	11.9889	11.8337	11.641	12.1828	12.3969	12.2189	12.3271	12.2942
ZMAT5	8.13326	7.77458	8.07653	7.91033	7.83903	8.67382	8.29401	7.89041	8.29713	8.1879	8.57905	8.339	8.35592	8.4147	7.92833	8.05472	8.77524	8.28546	8.642	8.3281	8.54707	8.58102	8.33745	8.04862	8.42035	8.66549	8.32655	8.50398	8.67482	8.20975	8.14763	8.19769	7.56518	7.89511	8.03018	8.37215	8.37828	8.95111	8.40134	8.40698	8.37464	8.36395	9.10788	7.67428	8.13172	8.1054	8.3842	8.65695	8.1168
ZMAT3	8.72469	9.4469	9.82378	9.47121	8.38306	11.9076	9.73638	9.20471	9.96721	9.78759	10.4726	9.59561	10.4827	9.99378	9.84988	9.8477	10.9083	10.2014	9.55392	10.093	9.63419	10.3587	10.6484	10.1714	10.4246	9.89922	9.34791	9.8654	10.2718	10.7861	9.68911	10.2159	9.5074	9.36709	9.51704	9.71547	9.78759	10.2897	9.9326	10.0801	9.68459	10.2809	10.9492	9.98965	10.6656	9.75429	9.73786	9.66461	10.4634
ZMAT2	10.4987	10.85	10.747	10.7597	10.6665	10.6307	10.7066	10.2842	10.7144	10.8743	10.8256	10.5731	10.6303	10.904	10.9592	10.524	10.6931	10.7901	10.6939	10.7476	10.8671	10.3263	10.7099	10.4016	10.7412	10.7606	10.9654	10.5525	10.683	10.9958	10.8845	10.9431	10.6265	10.7797	10.788	10.5858	10.5731	11.0256	10.9171	10.8882	10.675	10.935	10.8006	10.8929	10.6964	10.7744	10.6672	10.3871	10.8556
ZMAT1	8.97575	9.14711	9.53465	8.94847	8.81388	8.75082	9.27718	7.19507	8.99392	9.32399	7.22173	8.82152	7.99876	8.76812	8.58224	8.19532	8.56615	8.48817	9.24906	8.64725	9.25211	7.78672	8.16103	8.09607	8.72576	7.68143	9.0344	8.78661	8.05682	8.97526	9.2591	9.45222	8.36572	9.01732	9.32072	9.24107	9.20508	8.50681	8.97317	8.75005	8.39977	8.77065	6.80942	8.64111	9.60355	9.13686	8.79695	8.26172	7.63833
ZKSCAN5	5.80983	5.71293	5.84592	6.30754	5.77392	5.71778	6.09963	6.08101	5.90697	6.1467	6.27766	5.98269	5.86675	5.75406	5.96198	5.73552	5.77507	6.21666	5.76905	5.75143	6.28401	5.56267	6.19266	5.52679	5.45479	6.45178	6.32002	5.9363	5.95014	6.13238	6.02327	5.78181	5.84494	5.85623	6.25013	5.80881	5.89676	6.56539	6.1763	6.17896	5.93322	5.74463	6.36501	5.18297	5.73453	5.51101	6.36105	5.31882	6.01744
ZKSCAN4	6.71818	6.67945	7.21052	6.9536	6.24194	6.99947	7.19539	6.18349	6.81947	6.44572	7.15329	6.64699	6.37539	7.21439	6.69629	5.5994	7.37962	6.75409	6.96198	7.08312	6.83747	6.85977	7.37153	6.43353	6.98954	7.01635	7.15872	7.47407	7.24692	7.01635	6.92448	6.89126	6.30288	5.89966	7.03395	6.6813	7.01982	7.58335	7.05999	6.93863	7.04817	7.17149	7.36854	5.46037	6.71892	6.64497	7.30862	6.92162	7.12679
ZKSCAN3	6.37927	6.46729	6.67743	6.29293	5.90122	6.24009	6.77462	5.4109	6.51018	5.88159	6.75324	6.56962	6.27978	7.00928	6.34226	5.32833	7.01935	6.4339	6.54017	6.47508	6.73384	6.15175	6.85064	6.04438	6.41544	6.91039	6.62992	6.91013	6.98639	6.66398	6.56271	6.46782	5.94157	5.95448	6.95737	6.31292	6.81919	7.1502	6.73909	7.0901	6.57471	6.80189	6.87706	4.84118	6.45343	6.42131	6.81403	6.92996	6.78601
ZKSCAN2	7.32879	7.52346	7.85586	7.5652	7.74425	7.80946	7.44833	7.4309	7.44676	7.37931	7.46962	7.2617	7.52292	7.5573	7.65912	7.11435	7.75005	7.805	7.80264	7.48126	7.61299	7.23927	7.27114	7.30749	7.6692	7.70378	7.68603	7.53245	7.61457	7.49479	7.28561	7.72586	7.92404	6.99196	8.03123	7.74174	7.40437	7.35961	7.43797	7.66474	7.42013	7.29677	7.65912	7.28905	7.78923	7.71602	7.64969	7.59232	7.35749
ZIM3	2.41557	7.90349	2.47029	2.63912	2.2994	2.42693	2.46829	2.41195	2.40385	2.41195	2.46829	2.44899	2.42349	2.4078	2.45906	2.40385	2.39368	2.48621	2.38802	2.45906	2.49957	2.32475	2.33684	2.44899	2.46591	2.47654	2.41557	2.38802	2.51373	2.41946	2.41557	2.43989	2.35424	2.45906	2.44623	2.42349	2.47844	2.41195	2.4505	2.42693	2.78226	2.452	2.39368	2.41195	2.45906	2.42975	2.43658	2.4315	2.38323
ZIM2	3.99303	4.36322	4.1401	4.11828	4.12391	4.87795	4.09303	3.85031	3.88724	4.04068	4.1009	4.77323	4.15633	4.36041	4.50314	4.37752	4.81222	5.04131	4.90926	3.68898	5.21061	4.39962	4.28377	3.93792	4.7002	5.03292	3.67425	4.87795	4.94969	4.58814	4.51542	4.73613	5.77855	4.24021	4.9619	4.80677	4.37228	4.16602	3.68898	4.47552	4.76341	4.61495	4.42657	3.22877	4.30101	4.54863	4.31277	4.67436	5.15139
ZIK1	6.45197	6.51336	5.68174	6.23813	6.76077	5.64729	6.34955	6.62069	6.50609	6.54751	6.42561	6.31476	6.43951	6.33749	6.5141	6.09283	6.77686	6.22998	6.331	5.9848	6.34199	5.00961	6.38705	6.32063	6.29623	6.56285	6.82602	6.17043	6.26246	6.69406	5.64729	6.77126	6.5206	6.30613	6.77213	6.26425	6.32337	6.84872	6.29357	6.71898	6.53392	6.41456	6.51248	6.13471	6.44832	6.62904	6.27654	6.28017	6.45539
ZIC5	4.7077	2.51978	3.10214	2.52292	2.67286	2.54626	3.60899	2.53957	2.55879	2.50642	3.04345	3.99649	2.54626	2.51892	3.95635	2.51806	2.5432	3.21657	2.55411	5.90402	2.4692	2.48611	2.22352	2.53671	2.53957	5.05327	2.82618	3.40127	3.63968	2.61924	3.99347	2.55073	3.60424	2.56591	2.55073	3.19211	2.89722	2.50642	2.57844	3.69826	3.42407	2.52383	2.58935	2.57672	2.58247	3.36914	3.37191	2.57903	4.3838
ZIC3	2.38068	2.37384	2.36923	2.36923	2.30845	2.37137	2.38712	2.361	2.34802	2.35467	2.38068	2.38068	2.45583	2.38068	2.35816	2.35467	2.3417	2.37851	2.361	3.49276	2.361	2.31863	2.33826	2.37608	2.36377	2.38912	2.87212	2.91606	2.38712	2.58174	2.38307	2.37384	2.2852	2.39322	2.38712	2.36923	2.3773	2.33826	2.38507	2.38307	2.38307	4.10033	2.37384	2.39132	2.3952	2.33423	3.2493	2.32257	2.38068
ZIC2	2.97247	2.96806	2.91542	2.9547	2.9849	2.93811	2.9833	3.40553	2.94964	2.95433	2.95058	2.98234	2.91895	2.98783	2.9849	2.96527	2.89471	2.99069	2.89962	3.24248	2.98586	2.93455	2.92086	2.97424	2.96527	2.94574	2.84814	2.89642	2.99112	2.90189	2.95559	4.22976	2.90783	2.92926	2.97467	2.93523	2.99156	2.97381	2.9253	2.93889	3.01168	2.98234	2.89299	2.90289	2.9253	2.93108	2.97424	2.91542	3.11164
ZHX3	9.52284	10.0108	9.67269	9.63023	9.40463	10.1483	9.13422	8.84403	9.65301	9.41517	9.65041	9.5235	9.93707	9.34775	9.99088	9.01105	9.9082	9.34662	9.61233	9.4809	9.66453	8.89422	9.60757	9.3933	9.66091	10.0873	10.0413	9.59913	9.08536	10.0813	8.87165	10.3225	9.67269	9.5312	9.81631	9.69972	9.42788	9.09383	9.33406	10.0863	9.83148	9.63764	9.75175	9.1168	9.98935	9.21643	9.41445	9.77215	10.2353
ZHX2	8.77416	8.89872	8.91636	8.99356	9.88223	9.73174	9.14341	9.3676	8.99119	9.51933	8.82069	8.84925	8.79228	9.13237	9.32371	9.79973	9.42226	9.02262	9.04042	9.28141	9.07451	8.88514	8.98782	9.02547	9.13174	9.38637	9.32416	8.43553	9.11249	9.2066	8.76084	9.16956	9.50934	8.77506	9.17307	9.21873	9.19176	8.78222	9.47363	9.40017	9.51281	9.30892	9.45713	9.26224	9.53536	9.27506	9.12004	9.06075	9.53466
ZHX1	8.66545	8.89834	8.64914	8.54256	8.5516	8.75067	8.64026	8.62862	8.68811	8.72072	8.6182	8.48387	8.52402	8.4602	8.74205	8.45632	8.81903	8.79818	8.56972	8.75643	8.80219	8.43924	8.50287	8.37459	8.28404	8.57852	8.79643	8.43179	8.31531	8.83591	8.58293	8.94348	8.47179	8.75909	8.62812	8.71785	8.62862	8.15487	8.38782	8.75796	8.3175	8.45195	8.1527	8.09175	8.7243	8.69496	8.51545	8.47397	8.27329
ZGPAT	11.3149	11.2651	11.1866	11.2313	11.3182	11.2834	11.4005	11.5475	11.3458	11.034	11.2019	11.3094	11.3538	11.159	11.1386	11.1082	11.3005	11.0236	11.2096	11.4456	11.0706	11.3699	11.2537	11.3479	11.0943	11.2132	11.0706	11.1831	11.2164	11.2664	11.3341	10.9695	11.2904	11.013	11.3041	11.1968	11.0661	11.3182	11.5416	11.1082	11.2664	11.2069	11.5416	11.4738	11.272	11.0798	11.3667	11.2228	11.0466
ZFYVE9	4.96351	5.36953	4.90689	4.97322	5.42683	5.36586	5.45527	5.52255	5.30509	5.44771	5.48855	5.50074	4.95437	4.9484	6.00759	5.46169	5.254	5.76744	5.35157	5.65367	5.89708	4.27958	5.15933	4.97123	4.65437	5.85897	5.78527	5.04951	4.98012	5.75802	5.65216	5.13071	4.66067	5.98601	5.64474	5.53511	5.44202	4.27852	5.06724	5.45115	5.14558	4.81388	5.54774	4.63255	5.74437	5.20348	5.4671	5.46608	5.66463
ZFYVE28	6.50836	6.68268	5.35795	5.82041	5.61601	5.42545	5.47552	6.03015	6.00684	5.96146	6.14799	6.20138	6.23892	5.93844	6.08867	5.99799	6.1277	6.05392	6.39823	5.56207	5.94499	6.36527	6.44825	6.20314	6.27203	5.94716	6.36019	6.18454	6.19736	6.51679	6.23004	6.37903	6.53046	5.90716	5.9402	5.60546	6.63096	6.90441	5.76102	5.91116	6.62097	6.13667	6.43873	6.01259	5.78708	6.58166	6.18665	6.58063	6.48886
ZFYVE27	9.80457	9.73377	9.68948	9.77669	9.81437	9.52178	9.62304	9.82866	9.91029	9.68203	9.39233	9.61442	9.43559	9.586	9.78819	9.49172	9.38414	9.5886	9.44166	9.78819	9.94545	9.52694	9.65259	9.64495	9.5101	9.35272	9.82595	9.47588	9.612	9.63722	9.67961	9.49172	9.49926	9.65946	9.84175	9.68702	9.65467	9.83414	9.76861	9.74746	9.79954	9.45704	9.35933	9.85391	9.65946	9.26707	9.76309	9.32158	9.48038
ZFYVE26	9.85384	10.2231	10.5268	10.3509	9.56102	9.80047	10.4232	9.81905	10.2596	10.0013	10.8668	10.0699	10.2586	10.7476	9.97813	9.4729	9.86649	10.0209	10.238	10.2869	10.1221	10.6868	10.4239	9.50065	10.0443	10.3624	10.2125	10.5189	10.2484	10.1614	10.2934	9.88305	9.25776	9.78046	9.96579	10.0367	10.0525	10.7697	10.7893	10.0139	10.0513	10.1522	10.2094	9.22038	9.98246	9.90291	10.7081	10.0714	10.2718
ZFYVE21	12.5816	12.2585	12.2167	12.1409	11.7149	12.122	12.0738	11.4811	12.2304	12.0461	12.0781	12.0897	11.7635	12.0348	12.3317	11.4179	12.2389	11.9524	12.2117	12.4207	12.3205	11.6681	11.9649	11.5157	12.136	12.3292	12.3205	12.2737	12.1899	12.457	12.0348	12.518	11.6995	12.0259	12.1259	12.2117	12.2146	11.5906	11.8182	12.4518	12.6206	12.1409	12.0854	11.5795	12.1653	11.8823	12.1339	12.2292	12.5123
ZFYVE20	10.2877	10.2532	10.4541	10.2426	10.4756	10.4122	10.3796	10.4094	10.219	10.5093	10.3264	10.4614	10.244	10.3568	10.4837	9.89902	10.6427	10.5685	10.7291	10.0878	10.569	10.2636	10.2415	10.322	10.5224	10.8731	10.539	10.3847	10.7723	10.3698	10.4251	10.6517	10.3388	10.3703	10.5242	10.4011	10.5321	10.3621	10.2278	10.4777	10.5877	10.2361	10.5029	9.85339	10.3597	10.449	10.6254	10.8528	10.7477
ZFYVE19	9.46163	9.48429	9.70271	9.47066	9.13666	9.585	9.47508	8.78653	9.48701	9.35639	9.40329	9.61564	9.43203	9.46938	9.26618	9.21382	9.95822	9.20525	10.0088	9.75411	9.58973	9.86311	9.43899	8.97566	9.57636	9.65914	9.6727	10.0481	9.76922	9.56777	9.712	9.60411	9.05994	8.98319	9.64819	9.17115	9.42761	9.87095	9.58242	9.45457	9.56432	9.3234	9.78436	9.09196	9.45753	9.38637	9.77219	9.78201	9.66979
ZFYVE16	7.58375	8.49893	8.12038	8.03069	8.39797	8.54456	8.17287	8.23977	7.66707	8.4822	7.71795	8.51865	8.00719	8.44931	8.05035	7.97918	8.56024	8.45021	8.15334	7.65932	7.78723	8.409	7.97863	8.82485	8.01611	7.95595	7.73715	8.28918	8.27689	8.3158	7.86464	8.22064	8.55521	7.79602	8.54971	7.87874	8.13653	7.85625	8.1377	8.37539	7.43328	7.84643	7.49144	7.86578	7.80064	7.95568	8.14571	8.29008	7.80916
ZFYVE1	8.32746	8.39705	8.04554	8.40047	7.78822	8.1061	8.02787	7.83804	8.50867	7.80159	8.25811	8.28677	8.27739	8.09308	8.10797	8.10729	8.44739	8.14694	8.37202	8.20071	8.31103	8.26942	8.35277	7.67045	8.22877	8.43105	8.37614	8.28109	8.52832	8.27514	8.16734	8.32551	8.05344	7.95941	8.52937	7.93233	8.32234	8.36351	8.05735	8.28227	8.26833	8.15687	8.73096	7.45419	8.19749	8.15171	8.42566	8.2689	8.49655
ZFY	6.67856	6.75236	6.64849	6.48009	1.03793	6.64995	1.06961	1.17807	1.51261	1.56543	6.55326	6.14105	6.44554	6.26099	1.0604	6.73199	1.53365	6.34538	6.17896	0.761514	6.44957	6.30934	6.45989	1.46103	5.99976	6.27295	6.2334	6.24248	6.07389	1.2794	1.61149	6.73345	6.37144	6.28714	7.07959	1.14542	6.57851	6.42967	6.84436	6.60252	0.867472	6.31172	1.43347	6.48721	6.59272	6.6148	6.47608	1.16613	6.11133
ZFX	5.84475	5.67185	5.30724	5.56533	5.85861	5.71225	6.54983	6.32472	5.59898	6.50884	5.9697	6.13867	6.12269	5.71538	5.9955	6.83458	5.37549	5.59046	5.7768	6.0761	6.12033	5.69881	5.70029	6.64101	5.2892	4.89566	6.73978	5.70994	5.41192	6.43923	5.9955	6.37029	5.88849	5.83408	6.66674	5.86657	5.88308	6.00463	6.57756	6.53894	5.68121	5.74825	5.36049	5.79811	5.80029	5.57963	5.85367	5.52676	5.80029
ZFR2	7.59998	4.05964	3.34706	4.79192	4.78283	1.99335	4.00717	4.59359	5.12676	2.92133	4.04279	4.4157	4.30105	4.52108	5.3361	3.81077	3.65586	5.20119	4.42016	3.79299	4.62652	3.65766	4.32595	3.44768	6.32862	5.70799	3.91173	4.64184	4.58161	4.61552	6.79169	4.22232	2.8978	7.10225	4.25121	3.94639	5.20859	4.29911	4.03386	3.68325	5.86782	3.72456	4.47457	6.63877	5.05076	4.23881	5.14209	4.60401	4.75874
ZFR	9.12568	9.20078	9.36816	8.91571	9.33694	9.65879	9.37493	9.51117	9.19341	9.21897	9.10064	9.3023	8.90606	9.2676	9.2326	9.28382	9.17506	9.35355	9.47953	9.60986	9.05528	8.97713	9.16446	9.21117	9.14877	9.17581	9.29652	9.05813	8.98515	9.40495	9.29979	9.61524	9.4242	8.98233	9.39068	8.75205	9.27907	9.02751	9.24981	9.2288	9.08869	9.20448	8.61723	9.27037	9.29948	9.2163	9.0919	8.83266	9.07109
ZFPM2	7.44777	8.51206	6.82601	8.0968	7.10818	8.09934	7.06824	7.35772	7.4069	7.80261	7.20997	7.23878	7.71171	7.10037	7.62862	8.14033	7.98161	7.41461	7.51193	6.77305	7.41773	7.55409	7.59793	7.34785	8.41353	7.40119	7.0989	7.3355	7.66164	7.86864	6.57799	9.09812	7.29456	6.93117	7.797	7.88484	7.47052	6.68951	6.99071	8.09619	7.8114	7.313	7.13752	6.64375	7.6641	7.57242	7.03989	8.2709	7.49405
ZFPL1	7.08652	6.93648	7.04651	6.69977	6.90283	7.4168	7.18966	7.10671	7.27969	6.79467	7.38927	7.00194	6.91491	7.06414	6.90137	6.62318	7.39545	7.17625	7.39749	7.57846	7.27435	7.11821	6.94637	7.11148	6.90137	7.36677	6.93648	7.10978	7.34046	7.23045	6.95151	7.29627	6.73299	6.81591	7.16953	7.07176	7.01151	7.33001	6.81911	7.11148	7.10432	6.98713	7.79337	6.68729	6.85117	6.97158	7.24917	6.94544	7.14482
ZFP91	10.2853	10.9259	10.6788	10.6661	11.0837	10.9962	10.8614	10.649	10.5621	10.9482	10.4775	10.7748	10.7688	10.735	10.7225	10.7881	10.5076	10.535	10.6763	10.3743	10.2643	10.2747	10.6365	10.973	10.5737	10.9994	10.2899	10.8636	10.7133	10.5847	10.8111	10.9328	10.945	10.5036	11.0357	10.456	10.5989	10.1251	10.1253	10.7309	10.6105	10.7367	10.509	10.4775	10.548	11.0741	10.7506	10.4084	11.006
ZFP82	6.71901	7.19801	6.74628	6.90232	6.27327	6.52529	6.8576	7.16179	6.96927	6.19555	7.45105	7.13988	6.23843	7.24769	6.72393	6.19063	7.34277	6.98684	7.23988	6.77031	7.33866	6.06868	6.88966	7.00501	6.69519	6.57673	6.53869	6.59661	6.76995	7.0193	6.89399	7.6449	6.58112	6.44755	7.03987	6.66418	7.12213	7.00908	6.34163	6.81906	7.03646	6.99873	6.77444	5.4092	6.54467	6.80184	7.02639	6.98413	6.20852
ZFP64	6.04874	6.36971	6.30412	6.10678	5.25736	5.85103	6.44774	5.2295	6.07019	5.77265	6.24983	6.49974	5.94802	6.44374	6.3775	5.37964	6.36061	6.33703	6.29558	6.2626	6.1821	6.54325	6.45964	5.51738	6.28871	6.5307	6.23006	6.1894	6.46154	6.03839	6.23659	6.48763	5.04143	5.36969	6.39464	6.08307	6.35434	6.28541	5.59193	6.20508	6.54747	6.61857	6.51163	5.07268	6.01682	6.38226	6.20075	6.0854	6.34402
ZFP42	4.84918	6.27735	4.35545	3.52912	3.45862	5.57217	5.58728	5.93937	3.00077	5.85372	4.50737	4.57831	5.94392	4.50039	5.27547	6.09468	2.95359	2.8349	5.16362	4.97814	4.5178	3.21717	5.50505	6.03411	6.13946	5.86006	2.88767	4.0353	6.60917	5.42733	3.02988	5.83065	4.91043	2.77096	2.86419	2.86348	5.4948	5.82547	2.76463	4.92637	3.72127	4.541	2.91864	4.31057	4.66359	3.71875	2.86132	4.07436	5.2984
ZFP37	6.64078	6.53228	6.00072	6.84925	6.19729	6.37108	6.18049	5.78627	6.02784	6.00902	6.48421	6.2876	5.54101	5.77145	6.61024	5.53609	6.20378	6.01831	6.1104	6.24993	6.54622	5.30279	6.32549	5.52214	5.62152	6.11989	5.74121	5.81239	4.55444	6.58673	5.92805	7.23917	6.41	6.49257	7.04664	6.13428	6.5878	6.33466	6.26967	6.64854	6.41	6.64585	5.45583	5.22103	6.50125	6.11212	5.22497	4.60781	4.61303
ZFP36L2	11.8348	12.6745	11.6618	12.2635	12.495	11.074	11.6347	11.7993	11.9982	12.091	11.7665	12.1855	12.6302	11.4293	12.4056	12.5638	12.155	11.8567	12.2204	11.9218	11.395	11.1176	11.8252	11.7873	12.2511	11.8468	11.7993	11.8152	12.06	12.1512	12.0341	12.6004	12.8898	12.3525	12.1974	11.9499	12.0532	11.4468	11.9021	12.3914	12.2332	12.3779	12.1239	12.4056	12.0395	12.6479	11.8152	11.8435	12.1855
ZFP36L1	13.0459	13.22	12.6487	13.1243	12.9699	12.8425	12.7959	12.7525	13.22	12.9828	12.3763	13.4825	12.8315	12.66	13.1625	13.5851	12.715	13.1068	12.7617	13.3359	12.8953	13.5428	12.7738	13.06	12.8665	12.5657	13.008	12.597	12.8716	12.848	12.9132	13.8146	13.2339	13.327	12.9132	12.9699	13.4282	12.5081	12.5877	13.1476	13.008	12.9132	12.4452	13.4188	12.957	13.3177	12.5603	13.06	12.4675
ZFP36	15.0321	16.0726	11.7376	15.2545	16.4327	12.3167	14.0678	15.9217	15.3898	15.1689	13.5356	16.0991	15.4468	14.5525	16.2193	16.8264	12.1411	14.7551	14.2126	13.3273	13.2275	15.3546	13.3723	14.942	14.0566	13.3293	14.1144	12.4354	13.5283	13.8304	13.5978	16.4824	16.5435	15.3546	13.6364	14.7669	15.9217	11.6473	13.9826	14.7444	14.5158	15.0445	14.1093	15.7932	13.988	16.4327	12.5881	14.807	12.8734
ZFP28	3.06231	3.33608	3.93155	2.87508	3.17163	3.2453	3.32685	2.91608	3.17163	3.26107	4.56504	5.00606	3.0292	3.39354	2.68761	3.27561	3.29308	3.91615	3.10674	3.63327	4.79206	2.95366	2.84912	3.16612	3.13848	3.13299	3.09905	2.65924	2.6726	3.76164	4.43638	3.79292	2.71037	3.16086	4.59885	3.68725	2.89795	3.26732	2.81949	4.77093	3.76164	4.60049	3.3714	2.94885	2.70383	3.2453	3.98409	3.17948	3.60251
ZFP2	7.41514	7.30728	6.83721	7.12312	6.09919	6.49032	6.84894	5.25681	6.86884	6.56062	6.10134	7.23456	6.31891	6.75538	6.86066	5.93854	7.17003	6.69985	7.24652	6.56663	7.5345	6.81707	6.73084	5.84195	7.32275	6.55084	7.59513	6.65489	6.8146	7.05778	7.09373	8.33635	6.51201	6.33627	7.40525	7.18435	7.21272	5.92983	6.08009	6.93488	7.02089	6.95555	5.3186	5.32516	6.92331	7.02166	6.5728	7.0421	6.10225
ZFP161	8.40199	8.84446	8.82597	8.44519	8.05362	8.55778	8.98713	7.70478	8.29811	8.45033	8.91981	9.16515	8.6237	9.13352	8.39562	8.08217	9.03806	9.20641	9.06854	8.74688	8.8714	8.67394	8.78162	8.39814	9.07593	8.95421	9.22259	9.28539	9.22657	8.80325	8.77653	8.91725	8.23295	8.38607	8.96058	8.72024	9.17995	9.36804	8.58757	8.76234	8.88049	9.20947	8.78467	7.90683	8.82501	8.88386	9.12291	8.78651	8.90222
ZFP14	6.80606	6.69204	7.15524	6.76859	5.8401	6.40645	7.36202	5.5971	7.52938	6.0054	7.0572	7.10277	5.92368	7.08151	6.58146	4.9891	7.37043	7.10656	7.23811	7.39369	7.55161	5.09788	6.86875	5.79257	7.09023	7.02138	8.05105	7.57324	7.10988	7.74237	7.64173	6.4506	6.41366	7.0111	7.27887	6.33753	7.13382	7.65426	7.52681	7.48007	7.41056	7.12627	6.84991	4.70277	7.51181	6.68644	7.49285	6.04203	7.78796
ZFP112	8.04531	7.73837	7.67735	7.94847	7.50488	7.78637	7.44113	7.6148	7.79092	7.68004	7.58209	7.60788	7.10672	7.78478	7.70346	6.62298	7.71032	7.85214	7.80933	7.84912	8.05177	7.62103	7.6787	7.34089	7.47905	7.57029	7.89908	7.71685	7.57561	7.56093	7.7572	7.69376	7.81231	7.42988	8.39133	7.74795	7.66802	7.366	7.73497	7.77037	7.71622	7.56332	6.13449	7.03562	7.9306	7.11748	7.5463	7.37464	7.15962
ZFP106	11.5169	11.5629	11.3498	11.1228	10.9422	11.0042	11.0334	11.3867	11.5335	11.4163	11.1317	11.1342	10.8411	10.8595	11.4348	11.5886	11.4081	11.1186	11.2173	11.1663	11.5235	10.9193	11.2558	10.656	11.1655	11.5205	11.4904	11.0349	11.1017	11.2477	11.3672	11.149	11.3652	11.5304	11.2083	11.0976	11.0522	11.1754	11.087	11.2381	11.3072	11.0486	10.9704	10.7961	11.5314	11.1389	11.2091	11.1232	11.6402
ZFP1	6.80146	7.25455	6.84971	7.0591	6.60918	6.42452	6.63961	6.8468	6.74209	6.70996	7.00884	6.70623	6.61729	6.69268	7.12333	6.82697	6.92774	6.96898	6.62875	6.55961	6.80287	6.41372	6.95722	6.72698	6.5402	6.25318	7.19703	6.78943	6.61563	6.99129	6.85656	7.00884	6.99002	6.81159	7.06229	6.51963	6.72624	6.64005	6.84053	6.93789	6.71628	6.65118	6.46047	6.34565	7.01254	6.57666	6.40107	6.5033	6.53933
ZFHX4	1.68934	5.39435	3.85118	5.10528	3.68837	5.53738	3.37843	1.19257	3.12417	3.96336	4.68636	4.61278	5.06152	4.1509	4.22463	3.76803	4.4564	3.48794	3.36542	3.64122	4.40587	3.21441	4.25276	4.27588	4.28913	3.98106	3.02326	2.00157	4.36078	4.66541	2.88583	8.53517	2.32811	2.04976	4.60499	4.19438	3.69053	4.90124	2.37376	4.23497	3.61435	2.78527	5.23221	1.60722	3.99848	3.89076	3.21603	3.96058	4.18689
ZFC3H1	8.70028	9.40982	9.42122	9.48115	9.58281	9.03706	9.55965	9.19315	9.95373	9.67181	9.2347	8.93534	9.77687	9.0385	9.33525	10.423	8.64487	9.0327	9.31588	9.34189	9.34075	8.40517	9.17755	9.1801	8.55248	8.61482	9.7628	8.93838	8.64595	9.59306	9.60329	9.0946	9.62263	9.75148	9.15124	9.32727	8.91696	9.00573	10.1225	9.21356	8.6142	8.93731	9.30926	9.68016	9.79594	8.8715	8.6116	8.163	8.47698
ZFAT	6.67241	6.36705	6.44629	6.73559	6.52587	6.51613	6.59748	6.69564	7.02044	6.5304	6.8351	6.85626	6.7344	6.64978	6.62712	6.58464	6.84826	6.74024	6.73383	7.06529	6.76218	7.26352	6.92883	6.65727	6.80543	6.5911	6.77086	6.89835	6.95042	6.62633	6.73788	6.61235	6.36595	6.5246	6.80238	6.25119	6.69564	6.97932	6.79803	6.89314	6.70579	6.79036	7.21183	6.5229	6.50659	6.42946	6.82173	6.64	6.70001
ZFAND6	10.5761	10.2562	10.698	10.3575	10.5942	10.6388	10.5694	10.5207	10.4217	10.632	10.5385	10.5747	10.3308	10.6096	10.451	10.274	10.4569	10.7649	10.5915	10.5457	10.5106	10.6023	10.4782	10.5184	10.7147	10.1708	10.5818	10.446	10.4545	10.2806	10.5443	10.3541	10.4843	10.6418	10.522	10.4152	10.6401	10.4431	10.743	10.414	10.466	10.3693	9.95523	10.5929	10.5865	10.3455	10.6078	10.451	10.3855
ZFAND5	11.8024	13.5909	12.0386	12.7491	13.588	12.0087	12.2854	12.6468	12.4292	12.497	12.4046	12.6227	13.2517	12.5143	12.9785	14.6618	11.3571	12.2791	12.2377	11.8455	12.1178	12.4537	11.8751	12.2846	11.8895	11.3929	12.1219	11.6672	11.605	12.0719	11.9451	13.0131	12.9509	12.6517	11.714	12.495	12.2943	11.9855	12.8184	11.9451	11.9214	12.4165	12.0067	13.1951	12.3465	13.1944	11.6735	11.5103	11.7275
ZFAND3	8.84704	8.53211	8.51411	8.49492	8.63511	8.24688	7.99194	9.09183	8.39072	8.38468	8.9539	8.49265	8.9901	8.30323	8.78799	8.868	7.87795	8.70696	8.17262	8.14804	8.50798	8.36765	8.66369	8.73628	8.33664	8.69966	8.80905	8.33796	8.41561	8.99938	8.4759	8.63253	8.71657	8.77285	8.21176	8.83855	8.55025	8.49338	8.46394	8.56364	8.98406	8.58498	8.77505	8.67621	8.77118	8.54696	8.4759	8.26931	8.9019
ZFAND2B	9.30205	9.05726	9.3881	9.19437	9.30783	9.40923	9.46646	9.19114	9.34754	9.31264	9.38307	9.67265	9.19232	9.27936	9.0692	9.30429	9.5831	9.36146	9.6761	9.44938	9.66319	9.40336	9.45648	9.39152	9.36868	9.52013	9.45648	9.51834	9.66319	9.29066	9.27753	9.40732	9.10806	9.14599	9.57541	9.05144	9.54398	9.66093	9.37051	9.54127	9.43066	9.22377	9.78731	8.89116	9.31578	9.5711	9.66478	9.5942	9.53948
ZFAND2A	8.77584	8.77462	8.62372	8.44307	9.0088	8.74627	8.62805	9.55708	8.70165	9.09713	9.64349	9.19986	9.13604	8.70087	9.29085	9.56885	8.88356	9.21324	9.06552	9.02391	8.96675	8.26711	8.73844	9.25646	9.49981	9.13345	8.99889	9.16712	8.9283	8.81404	8.44917	8.67094	10.0433	8.88148	9.333	9.27021	9.17189	8.59018	8.87432	9.03808	9.00444	8.93242	9.12251	8.70977	8.88678	9.17217	9.47841	9.29646	8.92312
ZFAND1	10.8519	10.7943	10.6199	10.7211	10.6111	10.3194	10.2732	10.4265	10.887	10.5188	10.4536	10.4856	10.4258	10.4902	10.4815	9.9999	10.5307	10.1605	10.3371	10.3885	10.393	10.4833	10.2068	10.4593	10.3836	10.24	10.504	10.4801	10.3206	10.1978	10.6245	11.0109	10.3227	10.2921	10.3602	10.8197	10.4992	10.2725	10.6552	10.4485	10.5808	10.8828	9.50933	10.2451	10.5166	10.3314	10.353	10.3891	10.0986
ZEB2	9.97333	10.774	10.2379	10.7444	9.81235	10.2756	10.1627	10.0021	10.6285	10.3088	10.0598	10.5986	10.8737	10.6343	10.3492	10.3399	11.0421	10.5267	10.6664	9.39022	9.95211	10.6664	10.471	10.5278	10.2316	9.80764	10.0923	10.8808	10.7091	10.5912	10.0739	10.766	10.8092	9.77011	10.1964	10.4631	10.5121	9.91619	9.95448	10.2811	10.2502	10.6526	9.63801	9.6354	10.5	10.9272	10.1435	10.7174	10.11
ZDHHC9	9.17478	9.67534	9.63466	9.95801	11.6943	11.0784	9.65484	11.9302	9.91967	10.4742	9.9721	9.54612	10.9503	9.64766	9.95473	11.261	9.36786	9.59397	9.81709	10.1068	9.78937	10.8805	10.1899	10.8991	9.77534	9.80745	9.54238	9.67318	9.85617	9.44242	9.42411	9.68653	11.7486	10.47	9.46841	10.323	9.33369	9.67965	10.2743	9.55868	9.81998	9.71275	10.2535	11.1	9.96301	9.35509	9.54564	9.45864	10.1068
ZDHHC7	11.4663	11.1631	11.6785	11.626	11.1338	11.2555	11.3815	11.2103	11.3547	11.3112	11.6464	11.3326	11.3504	11.4674	11.4918	11.1416	11.263	11.3901	11.2739	11.8303	11.6207	10.9626	11.6049	11.2323	11.5721	11.5671	11.509	11.4161	11.4525	11.5291	11.5642	10.9936	11.0655	11.2609	11.7487	11.4022	11.4735	11.5455	11.6944	11.346	11.5848	11.6689	11.6954	11.0741	11.5637	11.3372	11.5857	11.4751	11.5601
ZDHHC6	8.8006	9.2711	9.1677	9.31707	9.45745	8.91505	9.14726	9.41065	8.86182	9.2943	9.29606	9.44435	9.2197	9.45692	9.09663	9.2277	9.18748	9.21574	9.1447	9.06996	9.2227	8.765	9.19862	9.63831	8.94461	9.19984	9.42356	9.22876	9.19431	9.15352	9.01987	9.39631	9.51205	9.4892	9.46487	9.29155	9.3879	9.46487	9.44379	9.3552	9.1967	9.32032	8.76569	8.98906	9.21462	9.4335	9.43813	9.15584	9.33159
ZDHHC5	10.1232	10.1777	10.0947	10.0771	10.232	10.1414	10.1088	9.70717	10.225	10.1526	10.112	9.99121	10.2434	10.0708	10.1899	10.2131	10.0708	10.0371	9.95163	10.5376	10.2757	10.1341	10.1565	10.3625	9.99121	10.2964	10.1396	10.1078	10.1843	10.1497	10.1646	10.0254	10.0527	9.9738	10.296	10.1551	9.94845	10.4555	10.2668	10.1232	10.246	10.2968	10.4117	10.0835	10.1748	10.0199	10.2767	10.1181	10.3191
ZDHHC4	11.022	10.6763	11.1266	10.5859	10.6205	10.8332	10.8481	10.4257	10.9058	10.6863	10.8189	10.7276	10.6482	10.7661	10.8211	10.2723	10.8948	10.6788	10.8252	11.2256	10.9646	11.0599	10.6205	10.5226	11.0489	10.3529	10.7538	10.9266	11.1886	10.7104	10.771	10.5722	10.3944	10.561	10.5407	10.8492	10.7315	10.9301	10.8687	10.6205	10.9939	10.803	11.1512	10.6065	10.8224	10.5701	10.9249	10.8719	10.8921
ZDHHC3	8.81311	9.32739	9.22114	9.26666	10.436	10.5659	9.7645	9.54033	9.46742	8.86214	9.71686	9.18066	9.45779	9.50813	9.23649	8.75059	8.99931	8.98592	9.24487	9.07661	9.56603	10.3002	9.24162	9.34582	9.00168	9.33427	9.18478	9.49342	9.98658	9.13034	9.02657	8.5749	9.50022	9.0064	8.92554	9.45065	9.1762	9.24725	10.4694	9.62513	9.37732	9.74252	9.66033	8.46727	9.07661	8.63076	9.56058	9.11392	9.34738
ZDHHC24	7.64714	7.90522	8.29578	8.04922	7.64928	8.68789	8.64012	7.66889	8.18251	7.86152	8.80362	7.84082	8.65847	8.30265	7.64357	7.90552	8.52432	8.0023	8.1695	8.11899	7.9018	8.79967	8.40749	8.25758	8.13321	8.41308	7.77986	8.36886	8.4617	7.91599	7.94416	7.77125	7.41783	7.73546	7.64491	7.9903	7.8303	8.81964	8.47336	8.05367	7.63025	8.1642	8.85697	8.08493	7.90326	7.9425	8.40641	8.44372	8.38258
ZDHHC23	8.64771	8.03428	8.05306	7.98717	7.61884	7.43857	8.05887	8.09391	8.37546	7.95205	7.69565	7.58583	7.78808	7.69265	8.02151	7.9535	8.1193	7.9417	8.15707	8.27973	8.45251	8.29214	8.05739	8.01208	8.27917	8.4203	8.34639	8.38195	8.32992	7.9618	8.30934	7.47823	8.01001	8.41263	8.31019	7.88903	7.86755	7.92978	7.80622	8.16347	8.36133	8.20167	7.3518	8.40723	8.55743	7.89983	7.9535	8.16076	8.32992
ZDHHC21	4.11237	4.11237	5.01488	4.91865	5.06674	5.73064	4.95882	5.85769	4.26583	4.13758	5.15201	5.1875	5.33844	5.03498	4.94511	4.65092	3.68348	4.7435	4.81495	4.30578	4.70151	5.80954	4.85799	5.58884	4.09428	3.67968	4.97201	5.0229	4.33563	5.02028	4.51267	4.11237	5.85035	4.89025	4.50571	4.78273	4.39077	5.05926	5.37568	4.71034	4.33985	4.95237	3.08544	4.94635	4.68996	4.53553	5.2195	4.94635	4.9486
ZDHHC20	5.67984	5.90299	5.86504	5.24742	5.97785	5.97256	5.83308	5.91992	5.49523	5.85717	5.49445	5.74936	6.20814	6.08976	5.70898	6.47338	5.2142	5.8349	5.93732	4.57782	5.37952	6.5005	6.5832	6.13891	5.43263	6.06505	5.48155	5.86661	5.64518	5.74539	5.46517	4.94348	5.7054	5.64796	5.70622	5.40099	5.61537	5.64879	5.56457	5.45568	5.72447	5.82225	5.41235	5.31759	5.49484	5.83816	6.09129	5.39128	5.95425
ZDHHC19	3.60027	3.90706	3.21633	3.55056	4.64048	4.13528	4.16449	6.09218	3.83146	3.20782	2.77965	3.22281	2.97489	3.27356	4.10883	3.20233	3.64594	4.17427	2.89804	2.63061	3.36896	4.44511	3.54247	4.26373	3.51262	2.96665	2.41144	3.00708	3.22281	3.3371	3.19981	3.28653	2.8808	3.07136	3.65578	2.90609	2.9421	3.71828	3.26004	4.83452	2.8574	4.28281	3.16867	3.73547	2.77784	3.41832	4.1294	2.73779	3.34257
ZDHHC18	7.21245	8.70588	7.10001	7.69318	7.75565	7.22898	7.71707	8.25053	7.72927	7.70349	7.99067	8.46016	8.05415	7.6352	7.85687	8.77302	7.33503	7.62016	7.26877	7.66556	7.80996	7.57402	7.88556	7.97767	7.58812	7.75627	7.98597	7.44085	7.87227	7.74005	7.41308	7.81679	7.55639	7.93837	7.48511	7.20044	7.85018	8.62512	8.27103	8.13233	7.70265	7.71214	8.61359	7.89234	7.33778	8.44712	8.02947	7.63453	7.79317
ZDHHC17	7.09281	7.48395	6.95999	6.46323	7.3664	7.77453	7.50864	7.31842	7.39359	7.47069	7.4761	7.79987	7.51124	7.32372	7.10973	7.34703	6.61323	7.2279	7.58801	7.06923	7.48776	6.59086	7.09659	7.42657	6.70277	7.10542	7.08357	7.2497	7.67574	7.83448	7.09799	8.24436	7.35598	6.82957	7.66304	7.3748	7.78766	7.3664	7.29131	7.9869	7.0264	7.56686	7.55677	7.28199	7.15399	8.08348	6.83521	6.41042	7.78476
ZDHHC16	9.99529	9.93622	10.7065	10.1117	10.2805	10.8464	10.5703	10.0958	10.2041	10.0181	10.3729	10.3016	10.5084	10.2496	10.265	9.69498	10.4192	10.059	10.2315	10.549	10.3419	10.5733	10.3643	10.513	10.1953	10.6413	10.4049	10.4324	10.3516	10.0645	10.0468	9.24482	9.74704	10.0298	10.4739	10.1479	10.1953	10.729	10.4976	10.3376	10.4697	10.3484	10.8509	10.1745	10.2522	9.74012	10.6429	10.4125	10.5982
ZDHHC15	3.19607	3.8434	3.90791	3.55708	4.03928	4.37736	3.87255	3.44813	3.88609	4.46823	4.12687	4.58461	4.68891	3.90791	4.36379	4.04835	4.05468	3.42846	5.60682	3.67611	5.01792	3.38116	3.58297	4.42034	3.79771	5.18301	4.80484	2.57559	4.27943	5.06265	3.51385	5.76845	3.56532	3.53052	4.88691	4.38744	4.68462	3.35901	2.18653	4.89748	3.97268	3.19357	3.55166	3.63009	3.81216	3.13419	4.37136	4.30864	3.35901
ZDHHC14	7.77694	7.94718	7.47449	7.30813	7.84765	7.41832	7.87375	7.74414	7.90729	7.86197	8.15986	7.83951	7.35612	7.61872	8.01355	8.92852	7.61683	7.78152	7.76447	7.60628	8.70108	6.73034	7.59918	7.29417	7.00568	8.53288	8.46759	7.66015	7.53447	8.21221	7.71419	7.84444	7.80883	7.93559	8.42493	7.43387	7.56913	7.65085	7.43493	8.30263	8.08554	7.36438	8.72191	6.5989	7.50639	7.61872	7.73517	7.47266	8.39481
ZDHHC13	8.83056	8.13087	8.15721	8.27607	7.84723	8.75557	7.82553	7.74397	8.32658	7.74715	7.63223	7.87474	8.54336	8.00911	7.9853	7.46106	8.10266	7.88388	8.18494	9.06422	7.63223	8.66237	7.84839	8.37313	8.04141	7.52366	7.86806	8.14285	7.82153	7.74397	8.36794	8.20438	7.71761	8.17929	7.84781	8.27224	7.99834	8.34012	8.09667	7.69044	8.41636	8.22344	7.41348	9.04838	8.22824	7.69575	7.89562	7.92532	7.83773
ZDHHC12	7.89589	7.75794	8.56718	7.79752	7.93028	8.56218	8.94802	7.45193	8.36712	7.96154	8.65383	8.39395	8.29003	8.50662	8.03347	7.70839	8.5507	8.17416	8.68758	8.3243	8.38021	8.60744	8.53995	8.17828	8.25192	8.48307	8.34046	8.3886	8.76802	8.15458	8.05383	7.39611	7.42176	7.82081	8.03812	8.09328	8.22314	9.02394	8.63405	8.12671	7.95173	7.98502	9.19176	8.18585	8.14222	7.89384	8.75394	8.47302	8.54295
ZDHHC11	11.6825	9.63537	10.9623	10.9368	10.354	9.61003	9.43873	8.87257	10.1671	10.2841	9.94068	9.61947	9.23456	9.10072	11.4799	9.43478	9.6902	11.0626	11.9009	11.3501	10.1282	9.06132	11.0177	8.85367	10.4409	10.2576	11.2018	10.7124	9.30637	9.15213	10.0761	8.72707	12.2183	10.9684	11.7482	10.1767	11.234	10.9623	11.231	9.81778	10.9576	9.90857	8.72566	11.142	12.0661	9.42365	10.6428	10.4564	11.0296
ZDHHC1	9.65777	6.75305	7.34356	7.70369	7.39839	7.99001	6.85948	7.09083	7.72906	7.45597	7.32355	6.98379	7.59084	7.21816	7.58482	7.3155	7.49192	7.68188	7.5983	7.51012	7.9364	7.77296	7.27629	7.3448	8.04272	7.68239	7.33401	7.42185	7.6482	7.553	8.19723	7.41128	7.55203	7.967	7.50019	7.67939	7.4844	7.61464	7.31463	7.29676	8.08866	7.16395	7.90381	9.04444	8.09136	7.68572	8.65936	7.41453	7.80649
ZCWPW1	10.258	9.62813	9.80681	9.4972	9.6638	8.96778	9.33857	9.06316	9.72828	9.78465	9.14805	9.47625	8.96533	9.32699	9.59575	9.13345	9.57925	9.51489	9.56088	9.07722	9.78207	9.33486	9.1522	9.05633	9.87374	9.52753	9.37787	9.53535	9.65222	9.10068	9.92729	10.2642	9.28635	9.56579	9.37157	9.55759	9.72893	9.23774	9.2875	9.42888	9.55759	9.52753	9.20441	9.37856	9.5428	9.47746	9.4332	9.75596	9.63083
ZCRB1	7.92837	8.15397	8.4649	8.00448	8.05823	8.6685	8.4182	7.23607	7.52913	8.35475	8.44849	8.57177	7.81941	8.68648	8.0855	7.88787	8.61913	8.2658	8.59746	8.12045	8.07126	8.69634	8.29762	8.67069	8.4878	7.75846	8.21249	8.79297	8.50259	7.82342	8.05878	8.60665	8.65369	7.88009	7.95986	8.43003	8.43594	8.16224	7.94739	8.17693	8.13554	8.67244	8.05878	8.14656	7.99178	8.54033	8.31099	8.63415	7.47944
ZCCHC9	10.0746	10.2117	10.2093	10.188	9.65028	10.1684	10.2323	9.86544	10.0501	10.2028	10.1199	10.0367	10.0696	10.1304	10.0156	9.31291	10.0631	10.0076	10.2594	9.80077	9.93564	10.3214	10.2128	10.1533	9.86365	9.51114	10.0934	10.042	9.85749	10.0326	9.88635	10.285	10.0193	10.0007	10.3234	9.90638	10.218	10.1011	10.0653	9.89927	10.0199	10.3675	9.5624	9.54297	10.0767	10.3004	10.0445	9.90699	9.82392
ZCCHC8	9.5619	9.74379	9.73457	9.73917	9.95916	9.24401	9.65963	9.69971	9.85652	9.62719	9.59723	9.75438	9.54377	9.72166	9.73525	10.0424	9.54552	9.65176	9.74761	9.57608	9.631	9.59576	9.65818	9.7093	9.47828	9.47034	9.86141	9.81008	9.67639	9.69621	9.79131	9.60055	9.99571	9.91343	9.92488	9.57107	9.82867	9.80138	9.87302	9.68927	9.51192	9.80274	9.06066	9.57048	9.69726	9.77332	9.50728	9.59576	9.58331
ZCCHC7	9.36825	9.58414	8.99627	9.46905	8.97518	9.21642	8.84565	8.90643	9.22927	9.01215	9.02606	9.29543	9.61643	9.0313	9.26286	8.99627	9.33584	9.42245	9.10491	8.91881	8.91276	9.1671	8.94738	9.18779	9.0651	8.62744	9.31277	9.20931	9.00562	9.33337	9.12374	9.88186	9.10214	9.16422	9.29347	9.55004	9.33826	8.79438	9.07205	9.12674	9.34984	9.85311	8.58151	8.85731	9.36886	9.50453	8.7756	9.06413	8.55615
ZCCHC6	8.35638	8.71135	8.71688	8.91901	8.66604	8.4477	8.75622	8.91466	8.58825	8.90581	8.71308	8.98131	9.13227	8.95616	8.76677	9.31458	8.57756	8.8747	8.49431	8.37665	8.35638	8.33156	8.75432	8.88487	8.46841	8.49867	8.72567	8.60995	8.62527	8.7376	8.65027	8.77641	8.89667	9.21719	8.69826	8.69355	8.72015	8.90631	9.08637	8.83543	8.18287	8.88487	8.09934	8.8681	8.74942	8.92158	8.79185	8.52892	8.30467
ZCCHC5	4.55422	5.19127	3.37991	3.81292	2.51892	4.40469	2.59035	4.31174	3.66733	2.26362	3.63312	2.74525	3.70391	2.7608	5.29642	3.77153	4.12715	2.61106	2.22675	2.85654	3.65565	2.18571	5.00616	4.12013	3.8592	3.59176	2.32088	2.39657	2.35067	5.47815	4.17639	4.4921	3.57425	2.07334	4.81061	3.55777	3.57163	3.71403	2.51623	3.59176	5.13446	2.16147	3.69751	3.21956	4.05708	3.54667	2.83934	2.22463	3.26437
ZCCHC4	5.13909	6.09249	5.83697	5.55525	6.19934	5.86136	6.05344	5.95389	5.45458	5.88365	6.06743	6.35088	6.07827	6.38997	5.8557	5.26239	6.12096	6.56868	6.38	5.74561	5.84356	6.01525	5.30865	6.3882	6.03878	5.67948	6.31932	6.43689	5.97954	6.03307	5.88435	6.46129	6.33963	5.57387	6.12383	6.28014	6.10404	5.76105	5.64095	6.15104	5.65854	6.11498	5.52008	5.59674	5.9372	6.26808	5.90389	6.14891	5.98681
ZCCHC3	8.48477	8.27208	8.37425	8.23213	8.72922	7.89803	8.30203	8.8139	8.51091	8.27161	8.05795	8.26075	8.23482	8.24952	8.33356	8.57915	8.4596	8.276	8.19525	8.20389	8.42161	7.58825	8.1071	8.21268	8.39226	8.56529	8.32843	8.2102	8.56421	8.44469	8.32028	8.55569	8.59924	8.53138	8.86009	8.38828	8.41204	8.4869	8.47799	8.53927	8.60621	8.35549	8.65396	8.40945	8.42989	8.3258	8.38718	8.16413	8.5637
ZCCHC24	9.66296	10.6343	10.031	10.3845	10.2299	10.0721	10.106	9.60891	9.89187	10.4067	9.90609	10.0446	10.6193	10.271	10.3891	9.86656	10.6897	10.0276	9.929	9.95996	9.94643	9.67718	10.6676	9.84322	10.2619	10.1124	9.90563	9.95496	10.4698	10.5574	9.67152	11.383	10.5368	9.34736	10.0584	10.4533	10.2607	9.74	9.64961	10.5133	10.0041	10.196	10.9599	9.61259	10.4667	10.629	10.0886	10.4027	10.4318
ZCCHC2	5.64644	6.49997	6.34444	5.79934	6.52938	6.38368	6.42207	5.94977	6.12808	6.70539	6.54229	6.25847	6.15203	6.67298	6.48251	6.28282	6.33661	6.51248	6.09682	6.16872	5.97957	6.14721	6.10917	6.46465	5.95223	5.91474	6.40642	6.3591	5.96618	6.0867	6.20076	5.82961	6.29609	6.40218	7.05588	6.2316	6.4557	6.49997	6.7495	5.88173	5.60001	5.97321	5.72936	6.2354	6.46115	6.3309	6.658	5.94411	6.16705
ZCCHC17	9.50099	9.90578	9.96998	9.77281	9.90338	9.89346	10.2935	9.62075	10.062	9.82085	10.1203	9.6525	10.1997	9.91132	9.89105	9.60076	9.88804	9.76486	9.90711	10.2421	9.80395	9.39735	9.93632	9.55501	9.47885	9.67878	9.86679	9.6269	9.87183	10.1561	9.78021	9.7831	9.64048	9.93353	9.9583	9.92851	9.82849	9.73519	10.1608	9.84574	9.90884	9.93353	10.3385	9.76865	10.0413	9.67069	9.72463	9.09922	9.64422
ZCCHC14	10.4028	10.762	10.5501	10.7762	10.5038	10.4648	10.2348	10.3764	10.5844	10.7548	10.3543	10.4853	10.6004	10.5355	10.7906	10.6369	10.6074	10.5828	10.6117	10.3436	10.3782	10.2753	10.3582	10.0611	10.3582	10.3433	10.6613	10.4283	10.5693	11.0011	10.4794	10.4055	11.1446	10.592	10.8075	10.6801	10.6271	9.72992	10.1841	10.5433	10.6902	10.6381	9.76786	10.1237	10.8222	10.5025	10.2791	10.3254	10.6978
ZCCHC12	2.66184	3.16737	2.25775	2.63417	3.08183	4.39974	4.23673	3.37904	2.74166	2.66524	4.33123	2.5983	5.44146	2.57226	3.68989	5.07099	2.73433	4.95866	4.84119	2.9218	4.86636	3.72475	3.47821	4.15799	4.60357	2.65916	5.08625	4.02466	2.3719	3.97492	3.24383	3.55325	5.41203	3.83958	2.65579	3.6927	3.06719	2.6486	3.41564	2.72966	4.09392	3.85875	3.70922	4.65898	3.59889	4.26919	3.35233	6.3541	3.75855
ZCCHC11	8.39605	9.40019	9.3088	9.14165	9.34843	9.30509	9.41044	8.53122	8.75793	9.2925	8.78301	9.49162	9.084	9.28432	9.15796	8.96242	9.29817	9.50199	9.61876	9.23546	9.2099	9.32743	9.15661	9.31316	9.63868	8.64794	9.41968	9.30991	9.4458	9.43994	9.30753	9.42472	9.33894	9.13014	9.49056	9.47617	9.45747	9.09306	9.21085	9.44455	8.8009	9.10885	8.12269	9.17986	9.33039	9.03652	9.17896	9.02028	8.94028
ZC4H2	8.30237	8.48594	8.19886	8.16932	7.84395	8.54994	8.07144	7.43225	8.16593	8.23016	7.98659	8.37092	8.25251	8.16181	8.12882	8.14629	8.37743	8.29114	8.52781	7.66967	8.62469	8.49384	8.16722	7.80918	8.48594	8.67252	8.19363	8.19614	8.40178	8.43265	8.29264	8.46545	7.77976	7.82877	8.36472	8.12833	8.22457	8.12381	7.99089	8.46519	8.34646	8.05102	8.4365	7.64382	8.2594	8.06765	8.33625	8.26258	8.43454
ZC3HC1	9.42896	9.69791	9.64916	9.78969	9.68228	9.78917	9.92998	9.95215	9.63749	9.61759	9.67222	9.5321	9.62463	9.60058	9.61759	9.09899	9.87982	9.62889	9.78085	9.75929	9.68947	9.6206	9.77139	9.59044	9.67849	9.83677	9.52876	9.74545	9.75524	9.70546	9.50833	9.88081	9.66832	9.44446	10.2058	9.61444	9.62	9.9869	9.64663	9.7612	9.71909	9.74594	9.87214	9.1799	9.65821	9.61913	9.69416	9.78405	9.72981
ZC3HAV1L	5.55239	5.73813	6.38765	5.69555	6.34448	6.28989	6.23626	5.65208	5.32196	5.68788	5.42141	5.99804	5.9931	5.88544	5.64062	5.79093	6.75158	6.3307	5.87504	5.78598	5.64741	6.05634	5.7798	5.34769	5.99955	6.38103	5.57498	6.5156	6.31037	5.97944	5.87286	6.04403	5.99567	5.73277	6.20728	5.60367	5.88506	5.93747	5.99351	6.20399	5.32995	5.54014	6.34997	6.68554	5.8381	6.31101	5.84739	6.6064	6.40193
ZC3HAV1	8.14727	9.34882	8.64721	8.77608	9.78527	8.76672	9.63359	9.63562	8.631	9.94951	9.26116	9.32636	9.38605	9.0504	9.01283	10.9519	8.84186	9.02257	8.53021	8.62824	8.42822	9.42839	9.44793	9.59279	9.18597	8.63545	8.84305	9.05392	8.93995	8.8254	8.89424	9.82371	9.52836	9.16534	9.3916	8.95376	9.07809	9.84137	9.98787	8.81082	8.63999	9.19319	9.94331	9.97149	9.30005	9.68237	9.29945	9.52183	8.90969
ZC3H8	5.5748	4.69491	4.99618	5.20326	4.61369	4.13133	4.49509	3.9514	4.27835	4.26584	4.94079	5.37981	5.86075	4.90903	4.11317	5.40962	4.87674	4.60757	4.08726	5.78707	4.31914	4.16032	5.40443	4.81687	4.05278	3.95608	4.27183	4.22997	3.79782	4.16561	4.21744	5.47498	3.92547	3.73643	6.02089	5.03814	4.78849	6.19459	5.65594	4.70038	5.29853	5.79111	4.30265	4.94186	4.99618	4.57697	5.18101	4.69899	5.30776
ZC3H7B	3.26906	4.93231	5.68223	5.07517	5.62161	5.80997	5.78648	5.42839	3.8607	5.38835	5.22669	6.43515	4.85797	5.98807	5.62198	4.81364	6.19373	5.98243	6.0808	5.13527	5.3447	4.61832	5.40499	6.17456	5.6039	5.95775	5.46462	6.40335	6.26299	5.5394	5.13274	6.14864	6.08141	4.80936	6.01889	5.2448	5.58973	5.10198	4.84527	6.23161	4.58933	5.75851	5.78588	4.53479	4.78775	6.03444	5.3615	5.94974	5.42178
ZC3H7A	10.866	11.0683	11.0212	10.9406	11.1072	10.7154	10.7652	10.6531	10.9841	11.2293	10.8708	10.8062	10.8654	10.8207	11.3095	11.048	10.7883	11.1646	10.914	10.7195	11.1356	10.349	10.9086	10.691	10.7821	10.8464	11.3234	10.76	10.703	11.0223	11.1313	10.8549	10.9112	11.4112	11.0597	11.2633	11.0098	10.6599	11.0388	11.0042	10.8006	10.9019	9.81373	10.9364	11.3047	11.006	10.8451	10.8582	10.7783
ZC3H6	7.31722	7.24465	7.57513	7.07984	6.95891	6.63756	7.06206	5.7308	7.12782	7.15841	6.89412	7.76621	6.9244	7.32468	7.15785	6.03165	7.59314	7.30296	7.78011	7.03829	7.33518	6.58092	6.59295	6.59763	7.49996	7.36036	7.34261	7.17798	7.58169	7.26597	7.65527	7.51059	6.4596	7.16515	6.85296	7.4089	7.45224	6.69347	7.1689	7.39271	6.90721	6.62899	6.85321	6.39286	7.44399	7.18597	7.22275	7.45166	7.31882
ZC3H4	10.6829	10.5889	10.1999	10.527	10.4212	9.83996	10.2777	10.3746	10.5661	10.2424	10.3549	10.5073	10.2325	10.2632	10.3249	10.4156	10.3217	10.5479	10.1376	10.0648	10.3848	10.28	10.3581	10.2005	10.2614	10.5204	10.4091	10.252	10.5245	10.4283	10.475	10.613	9.89254	10.0418	10.4943	10.3715	10.3938	10.4778	9.98629	10.3487	10.751	10.439	10.6227	9.89888	10.2437	10.3443	10.4543	10.0857	10.6231
ZC3H18	7.45451	7.63285	7.56442	7.2942	7.93209	7.72894	7.93003	8.30664	7.65281	7.72558	7.59597	7.64152	7.46881	7.5533	7.5716	7.68861	7.46827	7.54767	7.60824	7.58821	7.6162	7.83116	7.57929	7.59875	7.43276	8.0375	7.72487	7.53973	7.47571	7.72469	7.43975	7.51411	7.70621	7.32587	7.93624	7.1169	7.53019	7.83003	7.68763	7.92782	7.60602	7.08366	7.95762	7.60422	7.49257	7.50958	7.79818	7.42838	7.8741
ZC3H15	10.2861	10.3494	10.2826	10.4066	10.6794	10.419	10.3653	10.8866	10.3408	10.5356	10.1521	10.1795	10.3112	10.3501	10.4517	10.5621	9.97881	10.3494	10.0917	10.5233	10.117	10.4358	10.4638	10.7033	10.0966	9.63472	10.2552	10.0891	9.84833	10.1211	10.3682	10.5947	10.926	10.6363	10.5282	10.5399	10.3801	10.0399	10.4772	10.1451	10.1435	10.4761	9.3313	10.9167	10.3511	10.2297	10.038	10.1753	9.3954
ZC3H14	8.59507	8.48769	8.493	8.62544	8.51661	8.4271	8.29321	8.55733	8.64757	8.28788	8.72662	8.612	8.50981	8.42768	8.40562	8.8878	8.18308	8.30085	8.51417	8.50809	8.67059	8.21189	8.2413	8.28578	8.17576	8.33429	8.58079	8.23486	8.09571	8.32119	8.59687	8.51905	8.64792	8.61928	8.8878	8.21694	8.57582	8.45674	8.25685	8.38861	8.66557	8.51468	7.95186	8.46765	8.27225	8.2684	8.38187	8.16445	8.43675
ZC3H13	3.18422	3.79278	2.65163	3.62977	4.47816	3.33733	4.58011	3.14526	4.32575	3.86849	2.79212	6.13981	3.10626	4.30381	3.49521	3.42679	4.02322	3.50303	3.16338	2.6123	3.86083	3.08496	4.44406	4.32082	3.30186	3.19881	2.36891	2.82891	4.2314	3.26782	4.95362	3.66401	3.98959	4.46404	4.47607	3.82268	4.75363	3.45876	7.03461	4.1718	4.76149	4.1492	3.90496	2.99423	4.46035	2.84467	3.14806	6.44554	3.63136
ZC3H12C	8.51363	8.65784	8.59139	8.00542	9.01	8.49032	8.81083	9.48422	8.26636	8.87581	8.58717	9.0407	8.13901	8.59388	8.95211	9.4911	8.78077	8.97236	8.693	8.35392	8.70501	8.378	8.29998	8.84349	8.40514	9.19106	8.49788	8.378	8.25501	9.09159	8.58112	8.8769	8.94927	8.85873	9.53595	8.56833	8.82003	8.75047	8.03646	8.68669	8.51558	8.25979	7.78682	8.43512	8.32282	8.91044	8.73839	8.19009	8.65112
ZC3H11A	5.6502	6.58109	6.41041	5.82597	6.68256	6.44247	6.31067	6.14005	6.17655	6.70243	5.37132	6.48854	6.4629	6.36917	6.11708	6.4466	6.47696	6.22101	6.35244	5.2761	5.32278	5.64496	6.11268	6.43116	6.13572	6.63661	5.56775	6.68708	6.63542	6.11075	6.31272	6.31565	6.50866	5.99592	6.54305	5.90439	6.38642	5.04763	5.34814	6.418	6.06873	6.11362	5.70122	5.95456	6.14621	6.68708	6.44247	5.91126	6.62075
ZC3H10	7.58336	7.79526	8.3936	7.81544	7.32702	7.22486	7.46635	7.58249	7.79138	7.37974	7.72452	7.7714	7.0035	7.59726	7.78984	7.98598	7.91095	7.54852	7.77245	7.4426	8.04809	6.99357	7.96402	7.17305	7.76072	7.89341	7.85403	8.1883	7.95517	7.99664	7.47606	7.95517	7.8677	7.13058	7.64547	7.55739	7.62188	8.18881	7.46892	7.85315	7.61453	7.76158	8.18249	6.48911	7.64349	8.16825	7.61531	7.49363	7.95734
ZBTB9	7.98218	7.44022	7.8146	7.69581	7.54132	7.59308	7.93833	8.25249	7.48004	7.63193	8.13174	7.4181	7.25652	7.70825	7.83964	7.4358	7.48004	7.38537	7.4362	8.10029	7.85148	7.31296	7.66969	7.69346	7.56841	7.98218	7.9584	7.74111	7.89573	7.39876	7.72754	7.77786	7.59914	7.11367	8.17718	7.40185	7.63843	8.2317	7.61508	7.72432	7.86702	7.67037	8.31425	7.60582	7.58659	7.95799	7.97076	7.4446	7.80078
ZBTB7B	6.46356	6.49407	5.87826	6.34469	7.0387	6.27341	6.6182	7.27162	6.53512	6.31149	6.77015	7.07266	7.03658	6.40396	6.31893	6.94044	6.83095	6.46143	6.81584	6.5692	6.29733	6.87035	6.55719	7.55618	6.36055	6.75434	6.28855	6.74358	6.93502	6.14252	6.30107	6.68004	7.3349	6.87072	6.00483	6.29882	6.36635	6.70955	6.83065	6.75142	5.83593	7.00405	7.36135	7.09087	6.13928	6.6729	6.53035	6.94739	6.73375
ZBTB6	6.30916	6.1838	5.88602	6.33165	5.84023	5.61349	5.39869	5.97603	6.19336	5.40469	6.50803	5.80128	5.88946	6.14326	6.0525	4.75739	5.83468	6.05965	5.78446	5.15327	5.94191	5.55462	6.02531	5.61659	5.45869	5.87036	6.77809	6.1961	5.7289	6.19922	5.94057	6.17721	5.88688	6.03325	6.02787	6.39587	6.01642	6.02979	5.70377	5.55779	6.12103	6.52905	5.57289	5.0531	6.11948	6.10158	5.82269	6.2371	6.00649
ZBTB5	8.42086	8.38338	8.46872	8.47011	8.67347	8.23311	8.19371	8.801	8.60733	8.45352	8.31121	8.35979	8.55242	8.28483	8.62054	9.21953	8.39521	8.47726	8.34358	8.44026	8.63583	8.20855	8.42479	8.32012	8.57674	8.35578	8.59774	8.29101	8.46663	8.64705	8.37878	8.36945	8.79295	8.69903	8.53155	8.62847	8.54689	8.65645	8.6426	8.48215	8.47568	8.47542	8.80443	8.35725	8.59832	8.2956	8.33746	8.28102	8.42479
ZBTB47	8.61568	8.92529	8.15545	8.69787	8.68067	8.88548	8.0566	8.65371	8.56174	8.88483	8.4395	8.43109	8.82037	8.35154	8.57427	8.55849	8.81671	8.48105	8.74046	8.15407	8.73787	8.41624	8.3434	8.50398	8.90408	8.79879	8.57427	8.91871	8.78739	8.83877	8.51514	9.38242	9.08806	8.26014	8.76162	8.86317	8.37807	8.27636	7.91751	8.82076	8.79943	8.53782	8.6226	8.16303	8.61694	8.77742	8.35566	8.65435	8.8102
ZBTB46	8.40672	8.81032	8.21873	8.61852	8.93567	8.10085	8.34888	7.73756	8.56515	8.1808	7.85277	8.56208	7.91601	8.56208	8.37904	7.84012	8.83182	8.57017	8.59332	7.75735	8.30339	7.4719	8.10499	8.23358	8.05232	8.70488	7.97168	8.68395	8.69918	9.03079	7.84982	8.46469	8.30733	7.76502	9.06425	8.16516	8.77075	8.05836	7.6996	9.48424	8.43575	8.37527	8.74055	7.45716	8.04042	9.12645	8.52053	8.34249	8.54339
ZBTB45	9.95653	9.56096	9.69851	9.37441	9.55393	9.80993	9.57992	9.70775	9.71145	9.54201	9.40725	9.70321	9.34667	9.46677	9.66919	8.95219	9.88667	9.60874	9.95852	9.7257	9.86715	9.68531	9.64143	9.56174	9.73106	9.94703	9.78738	9.87818	9.98832	9.64391	9.7476	9.4911	9.41144	9.32977	9.95032	9.36806	9.4714	9.7248	9.49361	9.66529	9.68777	9.22503	9.81409	9.52779	9.77646	9.40322	9.79233	9.89594	9.89186
ZBTB44	6.98264	7.47042	6.8361	6.8613	7.11472	6.8453	7.03324	6.72276	6.77875	7.2854	7.23635	6.95937	7.2105	7.19714	7.03683	7.23736	6.76524	7.04532	7.10489	7.19648	7.03511	6.70534	6.56436	6.64164	6.99925	7.05579	6.84796	6.59733	6.90827	6.92903	7.23467	7.75341	6.52332	6.51892	7.09542	7.32912	6.9092	6.71806	7.08892	6.78508	7.14442	7.04879	7.18704	7.3509	6.9605	7.11131	6.98138	6.77138	6.84056
ZBTB43	7.10622	7.75176	7.74609	7.85243	8.22516	7.82921	8.15982	8.73371	8.05686	8.0162	8.13055	7.47745	8.0124	7.62743	7.83493	8.76854	7.55551	7.70889	7.32141	7.7587	7.71817	7.07678	7.60488	8.16556	7.41492	7.77194	7.625	7.54752	7.63383	7.79848	7.61233	7.68008	8.33575	8.09386	8.44768	7.53854	7.76448	7.75248	8.37732	7.82293	7.81192	7.0306	7.89155	8.27816	7.93591	7.19611	7.70507	7.17135	7.70704
ZBTB41	5.98404	6.16352	6.26535	6.21481	6.02166	6.14674	5.91832	5.6741	5.91908	6.02771	6.14285	6.42465	6.22834	6.34323	6.11069	5.90471	6.31817	6.30198	6.53352	6.03851	5.86654	5.96047	5.95551	6.19087	6.06039	6.27634	6.0779	6.63671	6.35374	6.12188	6.2069	6.49309	6.3773	6.03374	6.23936	6.11767	6.44995	5.98344	5.84983	6.30639	5.74769	6.11697	5.36934	5.80764	6.13991	6.01046	6.22523	6.00603	6.23853
ZBTB40	9.55837	9.49077	9.92627	9.72337	9.34261	9.13297	9.33567	8.96392	9.85227	9.12692	9.30079	9.29353	9.43856	9.5013	9.72879	9.20369	9.45492	9.57684	9.6318	9.44303	9.42947	8.97583	9.33855	8.65164	9.58272	9.42095	9.58749	9.30898	9.48574	9.75987	9.77399	9.3629	9.07744	9.37641	9.91704	9.36833	9.69211	9.45016	9.46211	9.49027	9.60469	9.36497	9.44491	9.3002	9.85696	9.47166	9.56718	9.41196	9.39963
ZBTB4	12.0999	12.1775	12.3493	12.021	12.1456	11.7408	11.8739	11.0693	12.1071	12.2818	12.1128	12.2576	11.9121	12.1204	12.289	11.8467	12.2499	12.1831	12.3555	11.9786	12.333	11.0266	11.9111	11.6724	12.012	12.4344	12.3013	12.1604	12.2902	12.2135	12.0767	12.2499	11.8904	12.1374	12.2522	12.14	12.3342	11.4754	11.8133	12.3306	12.0777	12.0999	12.1852	11.5693	12.2302	12.2781	12.2241	12.0879	12.4747
ZBTB39	5.35543	5.65161	5.55418	4.89139	5.3875	3.66287	5.48174	5.75492	5.80732	5.6415	5.70927	5.96844	5.42202	5.5847	5.05319	4.77131	6.00503	5.54392	5.32979	5.32672	5.933	4.85273	5.66432	6.75694	5.23542	5.57795	4.98318	5.28215	5.73166	5.93546	5.3035	5.527	5.97259	5.8493	6.41958	5.78335	6.0545	5.4869	5.37145	6.05925	5.8035	5.63987	6.39817	4.59628	5.0251	5.67743	5.62669	5.68048	6.4207
ZBTB34	8.68289	8.62649	8.81167	8.70806	8.71633	8.20754	8.39762	8.58227	8.91262	8.74754	8.74472	8.9035	8.39167	8.78429	8.92228	9.23136	8.68111	8.59894	8.50333	8.12095	8.81694	7.91896	8.4066	8.51032	8.3889	8.76336	9.00722	8.83637	8.9502	8.57403	8.46372	8.64727	8.95845	8.54242	8.85014	8.59844	8.72923	8.43075	8.65171	9.05582	8.6178	8.53023	8.30726	7.93704	8.48684	8.78183	8.83682	8.6453	8.89428
ZBTB33	9.76801	9.39253	10.3617	9.78001	9.16952	9.74973	9.7794	9.40113	9.74332	9.8611	10.3776	9.64805	9.54767	10.2313	9.46487	9.34572	10.0369	9.99952	9.87903	10.0714	9.49073	9.247	9.84322	9.63731	9.78661	9.66843	9.70332	10.3757	9.98249	9.70144	9.77727	9.59858	9.87032	9.73608	9.78917	9.86747	9.88475	9.78607	9.66199	9.93787	9.44416	9.97048	9.12291	9.62126	9.90595	9.66269	10.0844	9.83302	9.70096
ZBTB32	4.63663	5.68075	4.35112	6.72475	8.10264	4.24241	6.15532	5.77602	7.40084	7.7038	4.70301	4.66615	7.49119	3.63781	5.48021	7.91374	6.36527	5.06143	5.57933	5.54758	4.09604	7.26462	5.9662	7.87789	5.6291	3.30569	5.6574	4.05007	6.22376	4.54102	5.12992	6.97744	7.40874	6.11474	5.21697	6.06937	5.85219	6.3542	7.00201	6.04574	4.61707	7.15666	7.0259	8.60206	4.70629	6.77481	5.1518	5.93725	6.29866
ZBTB3	9.01714	8.76576	8.63656	8.39148	7.92631	8.25224	8.58578	8.11025	8.66135	7.93596	8.69122	8.86485	8.01504	8.65279	8.65155	7.09196	8.91346	8.5469	8.97222	8.64433	8.83536	8.49682	8.56951	8.30735	8.88192	8.92553	8.88898	9.06372	9.18046	8.54717	8.64546	8.44163	7.91358	7.97163	8.59819	8.39243	8.66592	9.03288	8.35621	8.76408	9.07097	8.71913	8.8938	7.71002	8.67721	8.23097	8.58908	8.85811	9.04242
ZBTB26	3.91915	2.22715	6.96033	3.12432	2.78789	2.91222	3.52865	2.93888	2.51911	2.50145	4.38488	5.29848	3.82962	3.26245	2.35391	3.90784	3.43622	3.93131	3.14857	3.07124	4.08444	3.35703	3.56743	2.53243	2.92168	3.99592	2.43951	2.08116	2.45303	2.72828	2.54203	4.65889	2.10886	2.94602	3.40984	2.75548	3.9601	4.55769	3.37436	2.70874	3.91668	3.8037	2.67461	3.64138	3.50181	3.18378	3.42247	3.56437	2.94166
ZBTB25	7.13335	7.60151	7.1869	6.87187	7.11948	6.83274	6.91465	6.95704	7.03107	7.15068	7.29233	7.0861	7.342	7.16329	6.98543	7.49721	6.69881	6.81021	6.88376	6.47837	6.71938	7.21348	7.13216	7.22266	7.11805	6.34794	6.50048	6.70624	6.68173	7.1105	6.62937	7.91565	6.6478	7.05742	6.39335	7.31285	7.08682	7.08354	7.64207	6.1912	6.77568	6.90826	6.80577	7.25639	6.85414	7.27141	7.03759	6.9201	6.97965
ZBTB24	8.19566	8.66299	8.74995	8.52213	8.52414	8.30684	8.62144	8.90519	8.51929	8.27991	8.64281	8.39309	8.37947	8.55846	8.50586	7.72344	8.79814	8.46303	8.54282	8.67328	8.39426	8.52566	8.55926	8.74386	8.65957	8.42098	8.49416	8.88962	8.78441	8.17145	8.72308	8.3191	8.70308	8.333	8.81049	8.69168	8.58822	8.89631	8.97096	8.43469	8.66383	8.81049	8.33913	7.97361	8.49355	8.41401	8.61558	8.82666	8.49626
ZBTB22	9.23888	9.0179	8.79974	9.1014	9.13409	8.51844	8.60343	8.59726	9.02483	9.00598	9.16192	9.02953	9.09631	8.86581	9.05321	9.46267	8.78721	8.93575	8.8682	8.51284	9.1146	8.63623	8.66864	8.88233	8.7916	9.09324	8.98328	8.91925	8.82648	9.25247	8.77245	9.1347	9.20439	8.88401	8.95305	9.34238	8.79629	8.77975	8.80724	8.90814	9.31324	9.45827	9.21181	8.69951	8.9652	9.14798	8.94026	8.8837	9.38109
ZBTB20	10.1057	10.5145	10.4591	10.0597	10.2866	10.4591	10.2961	9.94419	9.98471	10.4707	10.0272	10.4502	10.2155	10.1916	10.264	10.5229	10.4953	10.5625	10.5032	10.1985	10.6212	9.56146	10.2657	9.91609	10.3924	10.6802	10.5554	9.94673	10.4544	10.6926	9.96203	10.8171	10.3021	10.3315	10.6718	10.2554	10.3636	9.92264	10.0527	10.9299	10.2298	10.0156	10.7361	10.0078	10.3753	10.3655	10.3048	10.3004	10.7613
ZBTB2	6.46489	7.2367	6.60369	6.85949	7.44114	6.67573	6.72582	7.45232	7.5197	7.14247	7.11159	6.93743	7.1435	7.22555	7.05776	8.15275	6.95604	6.94442	6.87838	6.60626	6.25942	6.7988	7.10754	7.59155	6.6872	6.5569	6.55497	6.93478	6.64072	7.00328	6.70285	7.32186	7.69289	6.79199	7.16723	6.94793	7.22912	6.86297	7.0634	6.63201	7.31056	7.71503	6.57633	7.14433	6.89432	7.30771	6.65713	7.18111	6.70146
ZBTB17	9.36972	9.57601	9.51514	9.51974	9.87997	9.49584	9.64664	9.99712	9.56047	9.63741	9.37327	9.49711	9.63041	9.31229	9.70131	10.3094	9.66937	9.46421	9.71454	9.36972	9.58699	9.47441	9.55464	9.42334	9.52854	9.8334	9.46082	9.2488	9.43326	9.73858	9.41213	9.51581	9.67001	9.5593	9.69209	9.33533	9.36494	9.63288	9.77456	9.71763	9.43141	8.99243	9.9737	9.74967	9.54033	9.58576	9.57601	9.35506	9.60511
ZBTB16	11.6359	11.1165	9.9061	10.4842	12.8707	10.475	9.67271	11.1214	10.1358	10.7748	10.7587	10.3506	11.1552	9.79217	12.1778	12.3752	9.70432	9.55249	10.3953	9.14689	9.95839	8.38999	9.38222	10.5011	10.3084	12.235	10.7645	10.6691	9.72787	11.07	8.22331	10.8442	12.1326	12.6638	10.4765	10.252	10.2409	8.84322	11.2377	10.5852	10.3704	10.9236	9.53315	11.083	9.65285	9.41951	10.0554	10.7511	10.2161
ZBTB11	7.16833	7.39198	7.7216	7.54077	7.45895	7.27829	7.59689	7.73607	7.2196	7.43203	7.32877	7.46187	7.14943	7.56439	7.55105	7.58481	7.53192	7.75148	7.58296	7.32121	7.37331	7.38893	7.52376	7.40543	7.49269	7.08551	7.62926	7.36588	7.24632	7.37825	7.60118	7.5954	7.7556	7.63732	7.9263	7.44937	7.71449	7.50796	7.66606	7.46452	7.06997	7.7216	6.51995	7.45256	7.35354	7.63523	7.37223	7.4855	6.96705
ZBTB1	5.3884	5.72807	5.76773	6.04559	5.61115	5.81999	5.42556	3.92973	4.59087	5.98277	5.5232	4.45697	5.75483	5.98646	5.81552	5.93025	5.58464	6.12064	6.25627	5.04997	5.26291	5.53071	6.25847	5.90216	6.04265	6.0197	5.51473	5.48419	4.9218	6.3335	4.43237	6.49814	5.34505	5.42767	5.74266	4.56211	5.00954	5.11723	5.83753	4.67693	5.46463	5.88151	4.52863	4.92811	6.35254	5.90333	6.26989	5.05357	6.16447
ZBP1	6.21894	7.19405	6.94711	7.17625	6.78658	6.02914	7.87808	6.47831	6.87957	7.60457	7.56467	7.31572	7.63703	6.93684	6.38011	7.01323	7.67769	7.4818	7.2527	7.88619	6.62685	6.75691	7.91821	7.09432	7.94749	6.71839	7.47758	7.03259	7.52793	7.41016	7.67247	7.56731	6.00255	7.35925	7.21907	6.94668	7.50156	8.56555	8.68792	7.26607	7.40719	7.95766	8.83662	8.60203	7.09468	7.5473	7.58719	6.94819	7.52285
ZBED5	11.5789	11.3661	11.7261	11.5117	11.1088	11.1818	11.4206	11.0207	11.5106	11.1713	11.0747	11.1469	10.9972	11.3511	11.4753	10.4652	11.5469	11.5086	11.3354	11.9539	11.5766	10.9681	11.4582	10.828	11.3988	11.1001	11.664	11.2062	10.9289	11.4106	11.6817	11.2388	11.0754	11.4614	11.8713	11.595	11.5163	11.3914	11.562	11.38	11.4893	11.383	10.2115	11.1019	11.6599	11.2684	11.2489	11.2336	11.0508
ZBED4	7.49536	7.58111	7.36321	7.45799	8.41811	7.60686	7.55903	8.69378	7.46704	7.63643	7.97211	7.61308	7.94256	7.5451	7.53812	8.38798	7.1649	7.71633	7.33427	7.63426	7.46586	8.16854	7.89829	8.39032	7.23773	7.4849	7.55985	7.65338	7.4849	7.56339	7.49166	7.25787	8.46337	7.9256	7.89765	7.66732	7.723	7.91986	7.95382	7.59496	7.71134	7.76657	7.90092	8.61887	7.61131	7.44976	7.64891	7.30182	7.65019
ZBED3	8.77492	9.32139	9.29061	8.95117	8.79454	9.64021	9.24727	8.21372	9.34822	8.83655	9.16278	9.36989	9.15061	9.27929	9.13223	8.3531	9.37501	9.21908	9.7862	9.22941	9.5693	9.21316	8.97551	8.59589	9.27141	9.47666	9.28742	9.35315	9.37501	9.50515	8.96324	9.31849	8.59256	8.76819	9.33611	9.12104	9.10757	9.20334	9.22193	9.37952	9.3061	8.92636	9.21081	8.29062	9.28412	8.86954	9.28234	9.21908	9.44943
ZBED2	6.90213	6.92901	9.15712	7.60112	8.3284	8.87554	7.14997	7.85654	5.92965	9.28922	8.90179	8.28585	5.91573	7.18136	8.10294	8.64873	7.77038	8.01636	8.78678	8.18489	8.61948	7.76245	8.95255	7.79999	10.0741	7.32236	9.73493	9.67596	7.68913	7.45993	9.8437	6.73714	8.64688	6.37972	9.04648	9.27249	7.46446	8.73846	7.26014	7.81392	8.86196	8.22657	8.53755	5.59937	9.27101	8.3605	8.86735	8.99677	8.07355
ZBED1	10.0415	10.059	10.2174	10.3106	9.93994	10.2757	10.2191	9.63033	9.87566	9.8247	10.2954	9.92232	10.2792	10.1332	9.98797	10.2821	10.0884	10.2644	9.93358	10.2495	10.4359	9.92426	10.4829	9.86872	10.2812	10.3729	10.2017	9.92452	10.2108	10.3672	9.88645	10.4153	9.97287	10.0971	10.2209	9.94549	10.2341	10.5062	10.3461	10.3956	9.93994	9.92155	10.6406	10.3012	10.1596	10.2512	10.3349	9.99151	10.3678
ZBBX	11.681	5.19782	9.04591	8.67024	5.89804	3.23298	3.88146	6.84345	8.68983	5.78608	4.5201	4.57587	2.96441	6.61671	9.04645	3.46329	4.74254	7.75869	3.17862	7.29243	3.47806	7.6314	3.91106	5.79021	8.91219	7.08837	6.57739	6.08859	2.5523	6.35813	10.1675	3.51355	4.57139	10.0133	6.3959	7.79777	6.94191	4.05929	4.64966	3.39881	9.03481	4.83672	3.52288	10.9055	9.89112	6.51912	5.99036	2.80049	3.90474
ZAP70	7.64113	7.42671	7.04553	7.47029	7.37294	5.74254	8.38852	7.45198	7.47666	7.6932	7.11444	7.77042	7.50683	7.15947	6.83576	7.72976	7.80288	7.86623	7.64936	7.5915	8.09838	7.15464	8.21591	7.35193	8.00298	7.85603	8.10119	7.3463	7.33203	7.94711	8.5999	7.82764	6.29749	7.68867	7.99311	6.99919	8.49106	9.30028	8.05837	7.35962	8.01806	7.70542	8.32895	7.5965	7.33066	8.00298	8.59884	7.56539	7.3749
ZAN	3.114	3.99095	4.18522	3.98762	4.7767	4.3634	4.70675	3.90979	3.32936	3.98601	4.33577	4.42729	4.75023	3.95882	4.24471	4.49707	4.76401	4.81365	4.64768	3.70616	4.03302	3.18114	4.25468	4.3744	3.25695	4.28366	4.96571	5.26151	4.23241	4.32042	4.1163	4.23381	5.15086	3.95004	4.48609	4.28286	4.3503	4.8251	4.20348	4.76818	3.77965	3.97256	4.72804	3.69568	3.44732	4.60126	4.46483	5.23095	4.99826
ZAK	8.01484	9.50807	9.00087	9.39198	9.9307	10.2742	10.6164	10.0438	9.09757	9.59295	9.25509	10.0619	9.32476	10.0145	9.46103	9.12125	9.75522	9.67817	9.82163	9.29022	9.69599	10.099	9.24891	10.5369	8.94634	9.70733	9.47714	9.58947	9.84756	9.22861	9.16013	9.07663	10.5582	9.3898	10.2333	9.42204	9.50532	9.3732	8.89806	9.57678	8.7917	9.64843	9.01803	8.69235	9.26387	9.31231	9.61201	9.3898	9.81664
YY1AP1	10.9975	10.9662	11.021	11.0957	11.2581	10.9057	11.0247	11.5639	10.8565	11.2208	11.1805	11.2142	10.957	11.1633	10.9975	11.6726	11.0201	11.0084	11.1318	11.205	11.2868	10.9936	10.993	11.3238	11.0563	11.0518	11.3384	10.8779	11.2459	11.0526	11.0822	11.1001	11.5905	11.3186	11.1213	11.1735	11.0417	11.3788	11.3621	11.2093	11.1922	11.3143	11.1524	11.1673	11.0601	10.9943	11.1999	11.2034	11.1293
YWHAZ	10.6093	11.7666	11.5631	11.1749	11.2061	11.241	11.3141	11.2928	9.8457	11.8539	11.2827	11.7033	11.1992	11.2455	11.8655	12.297	11.5111	11.5043	10.8985	10.9914	10.8707	11.4063	11.7616	12.0896	11.5504	11.5474	11.3089	11.9189	11.4198	11.0856	11.6324	12.0299	12.3162	11.4339	12.0527	11.5198	11.5766	10.4524	11.2605	11.4216	11.3823	11.8956	11.323	11.5324	11.048	12.0873	10.7643	11.7096	11.5307
YWHAQ	13.0013	12.9735	12.9829	13.055	12.9821	13.1208	12.8493	13.091	12.9769	12.9206	13.2059	12.727	12.9945	12.8354	13.0332	13.1778	12.9174	13.0211	12.9402	13.1267	12.9127	12.4849	13.3294	12.9041	13.1474	12.8388	13.0289	12.8136	12.6368	13.1267	12.7892	12.8815	13.0594	13.1151	13.0332	13.0289	12.9166	12.9718	13.1116	12.8648	13.3046	13.0013	12.8736	13.0516	13.0759	12.782	12.8766	12.8915	12.8936
YWHAH	12.2361	11.9759	12.0639	12.4241	12.4819	12.4038	11.8594	12.201	12.0807	12.2814	12.8557	12.2197	12.2757	12.5899	12.3295	12.1529	12.0595	12.2801	12.0609	11.759	12.1525	11.7	12.4241	12.4022	12.0461	12.2986	12.3738	12.5946	12.2289	12.0932	12.2234	11.5751	13.1918	12.3364	12.4167	12.1723	12.2426	12.4684	12.2045	12.0178	12.47	12.4961	12.3578	12.2277	12.2432	12.3146	12.3088	12.4525	12.4542
YWHAG	11.4077	11.7391	11.6854	11.7816	12.2405	12.1608	11.7556	12.6106	11.7611	12.0812	11.9924	11.7873	11.9562	11.906	11.3106	12.3737	11.7263	11.909	11.872	11.8015	11.6503	12.068	12.029	12.5133	11.8452	11.7235	11.8201	12.075	11.9158	11.881	11.7422	12.2176	12.6157	11.4935	11.9372	11.7235	11.7777	11.8602	11.835	11.8073	11.6556	11.7873	11.69	12.3448	11.7936	11.7873	11.8573	12.0955	11.9792
YWHAE	8.57355	7.99462	8.4179	8.417	8.89879	8.86272	8.58902	8.72048	8.44724	8.61081	9.09788	8.90873	8.43215	8.94371	8.40179	8.95729	8.44391	8.66713	8.89534	8.01041	8.88419	8.22079	8.25373	9.01621	8.56205	8.52471	8.56088	8.82602	8.79856	8.55639	8.43333	8.62223	9.28038	8.67769	8.27986	8.6599	8.56759	8.63637	8.06587	8.70026	8.68946	8.62077	8.4883	8.70147	8.41444	8.54864	8.61765	8.71065	8.72279
YWHAB	13.2835	13.1684	13.3051	13.5379	13.0385	13.1855	13.3543	13.3329	13.5131	13.248	13.574	13.07	13.1404	13.4416	13.4477	13.1784	13.3799	13.2621	13.0973	13.6732	13.3132	13.1376	13.5502	13.0563	13.3107	13.3916	13.5294	13.1636	12.9412	13.3543	13.1352	13.1261	13.0681	13.1904	13.5043	13.3874	13.2675	13.4883	13.4512	13.3625	13.4764	13.4978	13.2311	13.1455	13.4085	13.1784	13.4247	12.9902	13.0921
YTHDF2	10.7782	10.8757	10.8948	11.0268	11.3098	10.9345	10.8749	11.4294	10.8588	11.0856	11.0431	10.6889	10.957	10.9817	10.968	11.0185	10.6682	10.9087	10.5326	11.2435	10.7658	11.2211	11.0717	11.1587	10.7505	10.6489	10.8437	10.7426	10.6856	10.7482	10.8497	10.7615	11.1075	10.873	11.123	11.1164	10.8345	10.8869	11.3169	10.673	10.939	11.1241	10.7999	11.2175	10.9781	10.5352	10.7877	10.7743	10.6585
YTHDF1	11.8459	11.7217	11.5574	11.7858	11.9892	11.7596	11.2651	12.171	11.7454	11.7181	11.4304	11.6669	11.6168	11.5079	11.7162	11.5872	11.7236	11.5462	11.7143	11.5506	11.6669	11.9916	11.5412	11.8689	11.6278	11.5063	11.6183	11.7519	11.8353	11.5295	11.7143	11.6669	12.255	11.6278	12.1025	11.6733	11.7024	11.461	11.6499	11.7006	11.8189	11.8178	11.4119	11.6489	11.7143	11.5853	11.6206	11.7579	11.7675
YTHDC1	8.95512	9.68456	8.45808	9.10938	9.93509	9.27095	9.52578	9.16358	9.57801	9.34175	9.78368	9.26916	8.28136	8.03518	9.89652	8.5122	9.70985	8.57845	9.66467	8.20551	9.92314	8.40004	8.58664	9.32851	9.17127	8.61054	9.64187	9.27202	9.01333	9.6333	8.90541	8.27381	9.65924	8.84457	10.3212	9.75644	9.02485	8.69466	9.21363	9.37137	9.0628	9.68898	8.59519	8.73136	9.43451	8.55439	9.31232	9.46079	9.45892
YSK4	9.86869	2.81604	7.17131	6.47566	4.05396	1.49906	2.31317	4.83159	6.99108	5.21434	3.16486	3.15049	1.36385	4.95211	7.12219	2.91903	1.66296	5.47042	1.58787	5.19951	1.48906	6.10376	1.52046	4.5846	7.07324	5.18932	4.72543	4.66508	0.883564	4.40968	8.13545	1.51185	3.4669	8.27068	3.97121	5.98864	4.96116	3.09023	3.96391	1.52664	7.2684	4.43628	1.61991	9.05232	7.48715	4.50571	4.11216	2.68751	1.9193
YRDC	11.2583	11.7113	10.4767	11.5218	12.3069	11.0042	11.2061	12.7493	11.3243	11.4306	11.3014	11.1679	11.7455	11.0042	11.5893	12.1171	10.7412	11.4441	11.0178	11.266	11.1244	11.6246	10.9584	11.9516	11.1194	11.065	11.2257	11.1363	11.2145	11.1131	11.1337	11.3723	12.3126	11.4333	11.7775	11.6432	11.3427	11.1293	11.2502	11.1744	11.3929	11.4049	11.4399	12.3037	11.1081	11.2982	10.9929	11.2876	11.1308
YPEL5	11.9994	12.1358	11.6942	11.9051	11.5622	11.4747	11.5428	11.3953	11.876	11.6557	11.6125	11.6196	11.8839	11.6414	11.8581	12.2078	11.4107	11.6075	11.5911	11.5879	11.5685	11.6928	11.695	11.3189	11.6733	11.5982	11.6691	11.2018	11.6214	11.5643	11.6075	11.9343	11.68	11.7537	11.4022	11.5453	11.7202	11.2883	11.6818	11.5489	11.8171	12.0224	11.307	12.0447	11.7086	12.0887	11.592	11.5927	11.5294
YPEL4	5.10562	5.34284	5.76155	5.19909	5.6551	5.46088	5.38154	5.06175	5.16794	5.56091	5.62547	5.52581	5.06811	5.66985	5.38354	5.04428	5.46179	5.74712	5.12127	5.07611	5.7318	4.44722	5.26163	5.11074	5.53713	5.76881	5.57947	5.17981	5.54372	5.58545	5.44199	5.41653	5.92052	4.98204	5.84955	4.74145	5.40597	5.88184	5.77656	5.37305	5.4795	4.60871	6.14559	4.85084	5.24319	5.28564	5.87857	5.52036	5.4126
YPEL3	9.70204	9.71849	10.1223	9.6165	9.35271	9.31337	9.69796	8.39735	9.62205	9.72618	9.42434	10.4339	9.2109	9.63149	9.44865	10.0035	9.77908	9.82177	9.95419	9.62808	10.3252	9.28062	9.37981	8.89358	9.83918	10.0519	10.4783	9.57609	10.2288	9.87299	9.63444	9.8272	9.67617	9.44427	9.8478	9.4768	9.93629	9.70861	9.82778	10.1597	9.65309	9.4254	10.071	9.12899	9.59013	10.0132	10.0056	10.2003	10.0071
YPEL2	9.16862	9.51622	9.36345	9.16256	8.57432	8.90153	8.50524	8.37872	8.60514	8.45803	8.87943	8.94799	9.25606	9.00612	9.03971	9.94728	9.14276	9.09987	8.68539	8.58998	8.89647	8.6941	8.89783	7.91408	8.78012	9.11709	9.11124	8.71045	8.77346	9.02762	8.95498	9.98909	8.56668	8.81926	8.76177	9.02935	9.21428	8.87272	9.06273	8.9308	8.85293	8.88372	8.8181	8.81896	9.12005	9.04079	9.07711	8.61854	9.40138
YPEL1	8.08764	8.11042	8.00708	7.86483	7.023	6.57735	7.22451	6.64942	7.74079	7.33346	6.97595	7.71564	7.0006	7.09983	7.95447	8.15842	7.88247	7.74411	7.434	6.95528	8.03833	6.56336	7.25402	6.60576	7.60682	7.52598	7.96022	7.66135	7.623	8.09655	7.61993	7.91553	7.83216	7.34274	8.82177	7.58387	7.77467	7.10937	7.47692	7.83676	7.85288	7.64355	7.67179	6.97037	7.7774	7.91901	7.65826	7.22522	8.1414
YOD1	9.32405	8.6328	8.80839	8.72511	9.32874	8.72277	8.71672	9.74904	9.0512	9.32816	8.80817	8.87805	8.667	8.7723	8.89017	10.0361	8.57751	9.23624	9.05577	9.23158	8.8648	9.12695	8.58441	9.47733	8.75421	8.89386	8.8435	8.7794	8.71893	8.65436	8.99124	8.41584	9.69236	9.58796	8.89017	9.11893	8.95947	8.90474	8.88483	8.93164	8.8793	8.93164	7.79492	9.38083	9.02252	8.60917	8.80587	8.62056	8.54088
YME1L1	8.35693	9.41106	9.45712	9.31868	9.63116	9.60502	9.56445	9.71711	9.14419	9.81938	9.68228	9.56733	9.59066	9.75305	9.51531	9.14935	9.66215	9.70446	9.61122	9.47617	8.6758	9.30757	9.57262	10.0063	9.59592	9.20119	8.92416	9.68321	9.40836	9.54814	9.35728	9.88382	9.91131	9.2956	9.61852	9.827	9.70495	9.15946	9.52054	9.42976	9.17312	9.61686	8.97299	9.22892	9.50649	9.52946	9.26329	9.43853	9.4209
YKT6	7.10549	7.07577	7.21678	7.66495	7.62482	7.79862	7.44701	7.58061	7.44967	7.29037	7.56838	7.11734	7.54579	7.17217	7.48685	7.45869	7.30048	7.3485	6.91246	7.6222	7.53812	7.23854	7.71671	7.68414	7.20702	7.60425	7.42803	7.34081	7.26167	7.61943	7.2498	7.24717	7.36382	7.20113	7.54986	7.33711	7.33789	7.78603	7.46826	7.38797	7.42879	7.46566	7.93916	7.6845	7.48237	7.36967	7.38655	7.20635	7.61367
YIPF6	11.2372	10.9287	10.9901	10.8787	11.1936	11.0366	11.0046	11.1409	11.2805	11.0248	11.4564	11.0229	10.952	10.9955	11.1114	11.1447	10.5189	11.4285	11.1297	11.1783	11.3113	10.9064	10.9212	11.0478	10.7629	11.1875	11.172	10.8213	10.9348	11.1163	10.1283	10.767	10.9714	11.5332	10.7213	11.0757	10.9384	10.817	11.0847	11.2134	11.0986	11.2107	10.8753	11.0818	10.8943	11.0174	11.0507	10.5992	11.2756
YIPF5	8.43926	8.99112	8.58512	9.09747	8.21941	9.10893	8.42679	8.60049	8.7426	8.56689	8.24851	8.78054	8.77182	8.46671	8.86829	8.30772	8.92906	8.82569	8.62803	8.52073	8.599	9.03992	8.81004	8.44522	8.6139	8.52365	8.52663	9.0195	8.94531	8.83947	8.72442	8.67783	8.42998	8.4988	9.09501	8.3361	8.34984	8.1113	8.59693	8.67734	8.58054	8.53926	8.43427	7.82035	8.62436	8.77014	8.54303	8.67562	8.86745
YIPF4	8.34315	8.8027	8.96727	8.64687	8.65315	9.13629	8.72348	8.68626	8.27861	8.86135	8.97139	9.43904	9.07693	9.06803	8.73634	8.98072	9.09002	8.86433	9.22611	8.68366	8.6929	9.09937	8.70127	9.23877	9.03292	9.01893	8.82778	9.18841	9.32982	8.8745	8.6197	9.10008	9.15136	8.8714	8.92277	8.66373	9.02701	8.6446	8.85571	9.17077	8.3863	9.32747	8.25105	8.63098	8.75501	9.05808	8.86433	9.09386	8.84626
YIPF3	11.1713	10.9375	11.1036	10.823	10.7071	11.2511	10.9634	10.8411	10.9153	10.8553	11.0535	11.1029	11.0008	11.0308	10.7815	10.8646	11.0039	11.1397	11.0081	11.1574	11.306	11.1952	11.0482	10.8319	11.1134	11.254	11.2438	10.9775	11.2113	10.9275	10.8677	10.6843	10.5457	10.9295	11.1322	10.9286	11.0122	11.1682	10.6785	11.0618	11.2795	10.8954	11.1773	10.9014	11.0266	10.8782	11.2106	11.3547	11.2694
YIPF1	10.2896	9.96935	10.0724	10.3644	10.1045	10.5463	10.1591	10.1203	10.2692	10.2782	10.3603	10.0897	10.3078	10.297	10.1691	10.0521	10.2474	10.1277	10.0704	10.371	10.1102	10.6715	10.4969	10.3378	10.1361	10.3867	10.0027	10.1681	10.5666	9.74966	10.2378	10.0438	10.024	9.8953	10.1322	10.0609	10.1935	10.6704	10.4609	10.0647	10.3748	10.3813	10.6823	10.2842	9.85112	9.96878	10.3357	10.4136	10.1141
YIF1B	8.60624	7.64522	8.50656	7.3704	8.3031	8.76787	8.12787	7.83766	8.07856	8.66745	8.5278	8.98651	7.66168	8.17551	8.66405	8.40919	8.64902	8.85545	8.56804	9.37503	9.13825	7.86326	7.48138	8.4147	8.62078	9.59611	9.25615	9.2864	8.46899	8.48088	9.01974	6.90566	8.31945	8.29476	8.84032	8.34581	8.16523	8.18661	7.00919	8.60068	8.84291	8.46731	8.59666	8.92322	7.99956	7.9189	9.06336	8.27524	8.99182
YIF1A	11.2501	11.2417	11.2247	11.122	11.2229	12.0465	11.4196	11.6078	11.2579	11.2086	11.6226	11.0081	11.6925	11.2451	11.2451	10.8476	11.4389	11.3342	11.3176	11.7473	11.5847	11.8409	11.3422	11.5601	11.4092	11.4977	11.5456	11.1525	11.4967	11.3554	11.3532	11.1283	11.1028	11.4389	11.1269	11.6012	11.2563	11.8487	11.5337	11.3162	11.4537	11.3022	11.7862	11.4479	11.3999	11.0349	11.3609	11.536	11.5435
YES1	9.29262	9.5671	9.53795	9.58336	10.1407	10.0746	9.414	10.0275	9.48484	10.1881	9.39162	9.78878	9.64859	9.46227	9.59954	10.0609	9.61007	10.0426	9.76073	9.69939	9.57027	9.5484	9.15878	9.98581	9.20521	9.50771	9.43755	9.7687	9.46869	9.68493	9.32816	9.76664	10.52	10.0061	10.606	9.89578	9.49177	8.60286	8.88932	9.84115	9.113	9.3581	8.54476	9.74381	9.60531	10.0323	9.51429	9.5831	9.12863
YEATS4	8.7466	8.60405	8.72023	9.03625	8.74946	8.46328	8.90624	8.00228	8.87063	8.57295	8.59066	8.88001	8.66952	8.46673	8.63208	8.7175	8.8067	8.86467	8.58012	8.52544	8.8703	9.11307	8.88332	8.27529	8.81347	8.18126	8.95983	8.73328	8.48346	8.11085	8.75001	8.93294	8.53685	8.78039	8.6002	8.96605	8.3774	9.02712	8.98165	8.60178	8.65168	9.08982	8.27902	8.34073	8.6156	8.62128	8.72191	8.30219	7.95888
YEATS2	10.2924	10.5407	10.6316	10.5314	10.2872	10.6134	10.5407	9.92334	10.6251	10.4124	10.4212	10.8366	10.2984	10.5274	10.4922	10.4045	10.4908	11.0284	10.8343	10.4539	10.5485	10.6115	10.5516	10.366	10.7119	11.1225	10.9065	10.9399	10.8396	10.844	10.4481	10.3446	10.2478	10.3288	10.5445	10.1791	10.8786	10.5648	10.1145	10.7822	10.7394	10.5195	10.2872	9.67638	10.5016	10.5905	10.9369	10.4489	10.9318
YDJC	7.63802	7.29745	7.63206	7.44195	7.87164	7.83204	7.91576	8.47221	7.74435	7.46471	7.56938	7.28014	7.54117	7.30044	7.10751	7.3724	8.03443	7.34837	7.78276	8.06213	7.44908	8.01697	7.67971	7.75641	7.65844	7.64801	7.42493	7.7642	7.99005	7.33448	7.56889	7.43401	7.66951	7.35554	7.64694	7.50373	7.38948	8.27585	7.82877	7.40091	7.56474	7.66022	8.05888	8.02491	7.45073	7.38886	7.60752	7.79164	7.73588
YBX2	4.49128	4.3312	4.56826	4.37514	4.74326	5.20914	5.23747	4.34843	4.54819	4.29394	4.05271	4.20527	4.10153	4.1466	3.95732	4.00197	5.08023	4.23334	4.71587	4.92478	3.98799	4.23079	4.50512	4.16753	5.15963	4.19546	3.15358	4.52911	4.81749	4.3562	3.934	7.34566	4.67116	3.70707	4.66121	4.21445	3.6871	4.56325	4.18158	4.59197	4.57507	3.59068	5.05349	4.36395	4.28767	4.40574	4.26684	5.26732	4.51264
YBX1	11.8555	12.1397	12.624	12.6319	12.3412	12.2106	12.5054	12.2006	12.6082	11.6744	12.8781	11.7854	12.7181	12.4606	12.3509	12.4291	12.2121	12.0726	12.2455	12.4779	12.0313	11.8925	12.5157	11.9259	11.9395	11.795	12.3832	12.0194	11.927	12.5244	12.3036	12.3632	12.1044	12.3234	12.1302	12.6761	12.1868	12.3509	13.0252	12.159	12.2288	12.7274	12.6166	12.4625	12.528	12.1374	12.0272	11.8636	12.2301
YARS2	8.5749	8.84142	9.07577	8.8987	8.94271	9.1361	9.05916	9.31602	8.6978	8.85539	9.36882	8.82612	8.92592	9.20865	8.64752	8.49277	8.59632	8.71122	8.90367	8.97627	8.79487	8.97218	9.04041	9.00232	8.67517	8.80573	9.04479	9.05529	9.04645	8.79238	8.76365	8.74813	9.05529	8.66574	9.1064	8.70137	8.85889	9.2818	9.04754	8.7621	8.69037	9.10797	9.20067	8.67996	8.781	8.4437	9.06033	8.78861	8.92966
YARS	9.6112	9.31816	9.45241	10.0571	10.3659	10.2185	10.0455	10.9847	10.0122	9.38698	10.5619	9.4319	10.1813	9.68404	9.83898	9.82721	9.34729	9.76239	9.59218	10.1108	10.0405	10.3523	10.0326	10.4981	9.59774	9.91024	9.90742	9.8102	9.53767	9.80965	9.78926	9.39306	10.1822	9.84377	9.48673	9.91762	9.60112	10.6399	10.3589	9.45828	10.1268	9.89883	10.3403	10.0108	9.61144	9.39609	9.88303	9.46003	9.94067
YAP1	10.0813	10.2623	9.92401	9.96369	10.5918	10.099	9.78838	10.7598	9.95001	10.206	9.60796	10.2111	10.1886	9.61289	10.212	10.649	9.86346	9.73045	9.91238	9.86446	9.8143	10.1415	9.87485	10.142	9.76114	10.3137	9.75103	9.95298	9.80632	9.98544	9.93035	9.86022	10.5342	10.063	10.3782	10.0609	9.89874	9.02121	9.62062	9.85381	10.111	9.75738	9.56404	10.062	9.96179	10.0945	9.79811	9.57259	10.1627
XYLT2	11.5242	11.4823	11.1838	11.3668	10.7564	11.1461	11.2086	10.1137	11.1426	11.1025	11.2237	11.2811	11.0067	11.2227	11.2659	10.874	11.2098	11.0047	10.9269	11.142	11.3103	11.6434	11.662	10.6068	11.7491	10.9828	11.0067	11.5143	11.5979	11.5313	11.2749	11.5342	10.3829	10.8755	11.5188	11.1597	11.0459	11.1693	10.663	11.6563	11.4541	11.516	11.478	10.844	11.2559	11.0959	10.6331	11.2135	11.1979
XYLT1	6.60998	6.52427	5.77496	6.22059	6.93988	6.37179	5.84558	6.79957	6.14576	6.61484	6.29307	6.5525	6.52808	6.60729	6.16527	6.67897	6.20656	6.71934	6.43895	6.12308	6.45863	5.81583	6.33406	6.61263	6.20528	6.54111	6.67501	5.99237	6.65111	6.6232	5.97322	7.81808	7.32036	6.43478	6.76864	6.18969	6.60036	6.19844	6.05923	7.06915	6.47044	6.33876	6.244	6.47606	5.98181	6.63858	6.30665	6.29667	6.44697
XYLB	2.93065	2.88874	3.93232	2.86974	3.22012	2.89447	2.89098	4.28675	4.48432	3.23057	3.76737	4.01755	2.86024	4.7492	3.43507	2.89542	2.86748	3.86773	3.64709	3.1947	2.90738	3.21388	3.14855	2.92749	2.89635	4.67886	3.83201	3.11375	3.70678	3.45295	2.90293	2.9098	2.83495	2.86024	2.89031	3.68655	3.70008	4.19377	2.85904	2.88799	2.88554	3.92646	4.75949	2.86604	3.24629	3.51159	2.89365	3.32888	4.13775
XRRA1	5.37943	4.42803	6.0929	5.33057	5.77109	4.39592	4.24841	4.00857	4.34385	4.21231	4.67656	4.3702	5.58981	5.27069	5.26637	3.9528	6.18421	4.18123	5.46681	5.86709	4.64481	4.22806	4.30137	5.12984	4.38952	4.55365	5.62301	6.94021	4.35073	4.86789	5.29456	4.88382	4.86301	5.54505	5.69394	5.62968	4.26492	4.22914	5.82765	5.71485	5.62436	4.6621	5.999	5.09915	4.63675	4.47006	5.26753	5.41767	4.69741
XRN2	9.41724	9.23421	9.39148	9.69458	9.58983	9.26255	9.39686	10.064	9.36137	9.26634	9.98251	9.20657	9.35985	9.49333	9.64291	9.88148	8.48839	9.4811	8.68064	9.03336	9.49714	9.16659	9.62999	9.40746	8.95822	9.02553	9.74927	8.9447	8.74294	9.48441	9.6042	9.51205	9.56485	9.71974	9.13071	9.52352	9.47561	9.65046	9.49211	9.26899	9.78744	9.74445	9.15944	9.66998	9.32967	9.17264	9.26168	8.77859	9.52995
XRN1	9.87901	9.98533	10.0243	9.77957	10.1835	10.0592	10.2037	9.97236	9.81137	10.3138	9.82953	10.5527	9.59743	10.0562	9.96095	9.81021	10.4645	10.3785	10.4736	10.3126	10.0025	9.8605	10.1128	10.3402	10.2122	10.1327	10.2143	10.1788	10.213	10.3556	10.1923	10.2991	10.1296	10.1509	10.1631	9.89184	10.3476	10.3672	10.1793	10.378	9.7363	9.82193	9.39893	10.0142	10.1021	10.138	10.3283	10.392	10.0543
XRCC6BP1	8.25472	8.46379	8.58818	8.40143	8.01512	7.96503	8.62447	7.84978	8.6345	7.90524	8.98207	8.44272	8.59491	8.80571	7.96647	6.91178	8.21958	8.41822	8.94263	9.18415	8.28226	8.65285	7.66554	7.66974	7.7107	7.91272	8.8014	7.76747	8.53235	7.91764	7.92586	8.66049	7.92524	8.04187	8.4358	8.10137	8.55515	8.21077	7.82992	7.51503	8.55091	8.34599	8.68235	7.43222	8.69184	8.51319	8.41704	8.50477	7.92586
XRCC6	13.1384	12.8971	12.9242	12.953	13.0187	13.1474	13.1294	13.3189	13.238	13.1384	13.1119	12.8853	12.9166	13.0629	13.0504	12.692	13.0048	13.0048	13.1294	13.2673	13.1949	12.99	13.1294	13.0048	13.0337	13.1776	13.0504	13.0337	12.94	13.1474	13.2865	12.7611	12.8971	13.0629	13.0116	12.9473	12.9768	13.2468	12.9091	13.0782	13.309	13.0337	13.1384	12.9658	13.0418	12.8308	13.1207	13.0187	13.2131
XRCC5	9.61888	10.0644	10.3009	10.2495	10.4363	10.3266	10.6527	10.477	9.76759	10.0726	10.4497	10.2282	10.305	10.4449	10.358	10.2815	10.1815	10.3631	10.1752	10.4209	10.0267	10.053	10.4145	10.5773	10.22	10.0891	10.0175	10.2395	10.2487	10.1925	10.1197	10.4411	10.4411	10.1842	10.3821	10.3342	10.2663	10.2286	10.1576	10.3058	10.2363	10.6133	10.2738	10.2191	9.98812	10.361	10.093	10.3192	9.86472
XRCC4	5.74797	5.82136	6.10383	5.89527	5.55613	6.24305	6.05002	5.41602	5.68317	5.64297	6.38917	5.77502	5.90926	6.17554	5.59153	5.90439	5.49572	6.17676	5.97551	5.37955	5.70032	6.03705	6.02202	5.85966	5.69296	4.87247	5.70339	6.54655	5.46344	5.33874	5.88861	5.77836	5.7208	5.87103	5.51353	5.60595	5.70399	5.94414	6.14414	5.55644	5.53275	6.07946	5.27665	5.85777	5.84479	5.7795	5.7165	5.71124	4.70411
XRCC1	10.3499	9.36382	9.95151	9.66999	9.46759	9.82152	9.81225	9.20423	9.94435	9.64183	9.74909	9.79364	9.67719	9.69778	9.80376	9.15877	9.96446	9.61996	10.1074	10.2293	10.0764	9.57693	9.5475	9.11027	9.8811	10.0024	9.90794	9.73967	9.89043	9.93033	9.83067	9.72874	9.38423	9.62967	10.0816	9.62297	9.82046	10.0721	9.76791	9.8143	10.0079	9.63999	9.99067	9.66362	9.98235	9.62297	10.0213	9.65664	9.97307
XPR1	9.64698	9.06117	9.25005	9.43969	8.9746	9.46877	8.34035	9.15132	8.78483	9.75285	9.07255	9.2014	9.32431	9.07973	9.33422	9.63502	8.5096	9.49113	8.96446	9.47089	9.12656	9.46292	9.21238	9.05604	9.09252	9.05268	9.43086	8.50151	8.43572	8.96744	9.09695	9.0142	9.11812	9.52533	9.24166	8.9981	9.01057	8.80613	8.70895	8.72129	9.12871	9.02078	8.12321	9.86352	9.18586	10.0036	8.67737	8.88309	8.90256
XPOT	7.93117	8.04764	7.85572	8.3934	7.90068	8.20204	7.66991	8.30042	7.77872	7.53254	8.30524	8.02872	8.44385	7.96676	8.01789	7.94051	8.00214	8.37013	7.93944	7.98085	7.89397	8.02638	8.02028	8.03678	7.87191	7.66319	7.88667	7.89284	7.83083	8.03006	8.13149	8.45498	7.9702	7.9531	7.98719	8.18556	8.01763	7.76484	7.68132	7.6858	8.06194	8.42699	7.30862	7.6032	7.82967	8.20233	7.85203	7.79993	7.6402
XPO6	9.00072	9.2539	8.67154	9.24237	9.31828	8.9269	9.34148	10.0101	9.19251	8.95762	9.43031	9.29645	9.14293	8.88988	9.34491	10.2532	8.87791	9.26176	8.69998	9.29446	9.19341	9.10526	9.42867	8.95762	9.30667	9.27017	9.28555	8.60712	8.96937	9.24697	9.30338	9.2251	8.6874	9.2115	8.81975	8.87162	9.22718	9.81491	9.30846	9.20542	9.22418	8.73824	9.77445	9.58726	8.8041	9.59872	9.25472	8.97304	9.2458
XPO5	7.37366	7.50088	7.446	7.69921	7.97628	7.75921	7.58312	8.96804	7.40144	8.68887	7.72567	6.82803	7.67745	7.57944	7.70465	7.30757	7.3209	7.19736	7.22467	7.69682	7.4531	7.73779	7.74575	7.81422	7.43827	7.62394	7.22747	7.36756	7.4706	7.64763	7.50725	7.59571	7.84255	7.22283	7.92185	7.34389	7.55787	8.05755	7.50017	7.5295	7.7488	7.51166	7.96259	7.49636	7.14099	7.45771	7.59643	7.3362	7.4706
XPO4	8.79395	9.5186	8.93817	8.99253	9.12271	9.96386	9.03803	9.42287	8.94362	9.21429	9.23526	9.08922	8.84687	9.10763	9.10217	8.65721	9.323	9.16459	9.12884	8.99198	9.43531	9.08192	9.51044	9.19405	8.87677	9.47122	9.39976	9.34283	9.11294	9.36292	9.16578	8.89978	8.89464	8.86688	9.47599	9.11348	9.29833	8.86887	9.00429	9.4226	9.23826	9.09234	8.8981	8.68165	9.22996	8.9012	9.36249	9.06592	9.27825
XPO1	10.6564	10.9591	10.9525	11.0334	10.2211	10.6162	11.017	10.3576	10.7463	10.6864	10.9429	10.7217	10.868	10.7754	10.8064	10.5388	10.8529	10.7456	10.4852	11.0084	10.5766	10.7799	11.1386	10.4478	10.8169	10.7339	10.8064	10.8058	10.7805	10.9185	10.9205	10.9391	10.0232	10.7951	10.7463	10.9814	10.8704	11.017	10.5652	10.7724	10.6428	10.9001	10.3852	10.549	10.7747	10.8984	10.7083	10.6271	10.6564
XPNPEP3	10.5873	9.41786	10.1342	10.1219	10.2279	9.53056	10.0445	9.72536	10.215	10.0657	10.2513	9.7288	9.64011	9.92552	10.1094	9.65181	10.2325	9.97141	8.91935	9.44702	9.66667	9.57564	9.85831	9.69611	9.8064	10.4327	8.74091	8.55083	10.0354	9.9845	10.4093	10.4684	9.20203	10.0354	9.87928	9.82211	9.8415	9.40393	9.95325	10.0259	9.81483	9.73788	10.6837	9.81961	9.78725	9.41645	10.4067	9.90904	10.3014
XPNPEP2	3.56342	5.77794	3.91146	4.22477	4.9763	6.0041	4.50326	5.11706	3.10296	4.45624	3.6594	3.58522	5.30258	3.23691	3.52478	4.88548	4.73318	3.63102	4.32801	2.95569	3.09274	5.15145	5.31817	4.46958	3.80882	4.23268	3.33445	4.12798	4.18429	3.70359	2.98783	5.69108	5.18184	3.02416	3.4195	4.27478	3.31278	5.26106	4.7678	4.69289	3.9729	4.40987	5.77679	4.62181	3.9198	3.82532	4.55824	3.99092	4.49847
XPNPEP1	9.98153	9.44873	9.8843	10.0526	10.2022	10.1898	10.0582	10.4373	9.55102	9.90604	9.85957	9.58448	10.2472	9.91949	9.71258	9.45555	9.40915	9.94674	9.5826	9.92971	9.82639	10.0113	10.0237	10.2733	10.1112	10.0422	9.90959	9.58856	9.93845	9.57188	9.64159	9.89689	10.3512	10.2757	10.0311	9.99588	9.64994	10.5019	10.1487	9.71832	10.2959	10.0572	9.94089	10.0628	9.92666	9.61918	9.95795	10.04	9.8471
XPC	10.1037	10.275	10.0496	10.1958	10.0859	10.3405	9.83616	9.81697	10.5643	10.0687	10.1934	9.96139	10.2503	10.2569	10.1714	9.67493	9.92179	9.97965	9.76453	10.0965	10.2998	9.80787	9.99813	9.6714	10.2304	10.0019	10.3352	10.0146	9.76919	10.2789	10.296	10.4783	9.85266	10.313	9.91396	10.3544	10.5129	10.3509	10.2684	10.1385	10.5178	10.4135	10.232	10.126	10.4107	10.4006	10.0851	10.1934	10.4473
XPA	8.49387	8.33821	8.27043	8.22756	8.04573	8.31723	8.11388	7.90939	8.17214	8.23755	7.89955	8.32812	8.0041	8.18375	8.16113	7.81226	8.25852	8.11364	8.5654	7.82683	8.41509	8.44728	8.13435	8.20439	8.39881	8.09471	8.38203	8.48904	8.04219	7.97475	8.21428	8.68791	8.30929	8.15739	8.22976	8.31162	8.47453	8.01494	8.18702	8.18491	8.47429	8.48401	7.24942	7.59904	8.2855	8.2789	8.25343	8.5086	7.74831
XKRX	6.39843	3.51214	5.37391	3.96612	4.9565	5.76911	5.12055	5.55843	4.65512	2.83507	4.15175	6.0981	3.79315	4.85686	5.22273	5.72579	3.06516	5.85811	5.31965	5.88239	6.59782	3.84351	5.69618	4.06761	1.92083	5.6235	5.43962	1.90802	3.4228	4.31345	5.77184	2.53178	4.78937	5.26271	5.12579	2.92164	5.24187	4.01455	4.09082	4.72198	4.43048	4.83215	3.36695	6.38302	4.33563	4.59541	6.3953	4.09082	4.26557
XKR8	9.27691	9.25876	8.97007	9.32024	8.81962	9.08572	9.27827	9.11688	9.39891	8.86724	9.15716	9.5346	9.32507	8.89421	9.39101	9.47952	9.34731	9.30135	9.42722	9.18602	9.41668	9.54204	9.39784	8.94649	9.31017	9.38062	9.30613	8.98371	9.45931	9.08429	9.34149	9.01816	8.87381	8.83577	9.07107	8.84101	9.02347	9.58512	9.21017	9.47787	9.22268	9.37135	9.58085	9.47952	8.93411	9.51304	9.22863	9.20057	9.3465
XKR6	4.54978	3.49867	6.03493	2.98243	4.29411	3.93639	4.71644	4.3007	3.27379	4.5752	5.38382	5.41789	4.65257	5.26599	5.36572	5.49211	3.38611	5.58937	5.27527	5.2436	5.28779	4.07581	5.1582	4.77486	4.34318	5.23615	5.33032	2.70039	4.17317	5.56127	4.69851	3.44519	4.31271	5.70874	4.88235	4.56231	4.92185	5.13355	4.84926	3.34496	5.34695	4.23275	3.8064	4.88235	4.23544	5.07634	5.291	3.39142	3.69634
XKR4	4.47074	3.19018	4.22745	2.88126	2.21802	4.90591	4.00431	4.11832	3.44882	4.19042	2.29145	3.75369	2.99692	2.11446	4.51632	4.71361	4.26355	2.96935	4.28884	2.70316	2.23875	1.82823	4.09134	4.13965	4.31739	3.99623	1.6911	4.26153	5.23573	4.86195	4.4312	6.11421	4.47514	4.07547	2.37786	3.03795	3.81093	4.60708	3.0601	4.48378	4.20076	5.24648	2.20471	3.23602	4.77835	3.30151	2.07846	3.21971	3.81381
XK	7.49657	6.7198	6.7535	6.89344	7.10976	6.41502	6.97404	6.61806	6.83702	7.29868	7.18947	7.72975	6.05637	7.04525	7.41835	7.22372	6.491	7.56623	7.57849	7.25727	7.3694	7.15949	6.4812	6.70108	7.45754	7.27192	7.64339	6.96582	7.20539	6.75797	7.00199	4.65248	6.71052	7.7351	6.74822	7.49635	6.90836	6.21975	6.95398	6.76577	7.1217	6.77264	6.32583	7.34583	7.74388	6.72727	7.19353	7.01568	7.72703
XIRP1	1.91445	2.81334	1.8664	2.88499	3.82272	1.90514	2.76571	5.67888	1.97515	2.00824	1.66774	2.02193	3.24244	1.89647	2.04247	7.13654	1.88772	1.72351	1.84685	1.57618	5.12095	3.12752	4.01786	4.50919	2.31962	1.8095	1.68836	1.69997	2.54283	3.05349	3.14638	3.46098	5.78393	2.95588	2.7571	1.81081	1.77652	2.57274	3.40576	6.3088	2.45019	2.89696	1.84236	6.74731	2.50637	4.28162	2.12016	2.28427	1.96705
XG	3.64776	4.15132	2.90464	3.44105	2.20965	6.26692	3.62166	3.74656	3.96237	3.03881	4.41946	4.07709	5.30698	1.49158	2.77893	2.49212	5.51302	1.22079	2.96377	3.87511	2.03154	3.98049	3.92111	2.30477	3.2852	3.93998	1.81917	3.31986	1.37706	3.62573	1.74926	7.59162	1.64609	2.0006	4.61038	2.65252	1.93042	1.77439	3.19172	4.69271	4.78047	3.89407	3.24683	4.45819	3.31662	4.39336	3.91107	3.02092	3.60059
XCR1	5.11915	5.85765	5.99763	5.66132	6.22918	6.19098	6.36492	5.76288	5.30314	5.87587	5.75235	5.88923	6.14952	5.98316	5.57701	6.52404	6.63976	5.89834	5.76091	5.66938	5.48813	6.4958	6.04766	6.33027	5.93934	5.97741	5.37388	6.43745	6.30697	5.9124	5.48562	6.11736	6.4895	5.33415	5.90552	5.55459	5.42271	6.39006	6.19193	6.04954	5.11038	5.79702	6.63656	6.23826	5.65334	6.46441	6.17108	6.38834	6.3965
XCL1	4.54074	6.35125	6.26215	5.37188	5.6969	5.10932	6.51801	5.82854	5.26534	6.37455	6.29056	6.47074	5.95829	5.75993	2.3473	5.53845	6.64158	5.75027	7.37317	5.54642	6.02051	5.33735	6.29184	5.79555	5.2885	5.77044	6.03844	6.45589	5.88765	6.21187	6.63301	6.26187	5.0943	5.43393	6.49132	5.54519	7.32956	7.94216	6.1763	5.85415	5.95089	6.2508	7.52808	4.5957	5.21261	6.63218	7.06599	6.66548	6.47267
XBP1	14.1927	13.9545	13.356	14.2489	14.3729	13.6088	13.769	14.2681	14.2921	14.0221	13.8693	13.7316	14.1478	13.3904	13.7495	13.7563	13.1111	13.5805	13.3298	14.6575	13.7495	14.4957	13.8761	13.8973	13.7316	13.2976	13.615	12.9667	13.7373	13.2151	14.201	13.2836	13.5	14.2229	12.8148	13.8637	13.8973	13.8304	14.6706	13.356	13.9369	14.5167	14.4152	14.9274	13.5644	13.5805	13.306	13.4097	13.7823
XAGE1A	4.49038	8.53672	10.7942	9.04353	7.19574	7.89353	10.7795	11.8638	8.76073	5.85017	8.09634	6.05093	9.07462	9.15981	8.84736	7.87617	8.44583	6.50576	7.35821	9.1874	3.83845	10.9207	9.44634	9.7078	6.59148	5.422	6.24073	7.17212	7.47872	5.14623	7.38079	1.90997	7.20683	8.43532	3.50777	6.01487	7.55787	9.34196	7.88865	5.8729	8.19018	9.61185	10.37	8.15959	6.27072	8.86957	7.02694	6.95907	7.1365
XAF1	9.55796	10.3295	10.3418	10.51	9.84219	9.84219	10.9993	9.45419	9.37	11.0075	9.81385	11.4387	9.12906	11.2805	9.51463	9.91789	10.5749	11.9281	10.3528	10.0613	10.5844	9.90328	10.7545	10.3604	10.7748	9.81042	10.6032	10.8969	9.98498	10.4243	10.787	10.4305	11.043	10.3759	12.0403	10.7882	11.1728	10.9893	9.9814	10.1553	10.243	10.2055	8.2005	8.58068	11.0021	11.0465	10.8074	10.6745	9.26842
XAB2	8.12255	7.7024	8.08645	7.50177	8.39892	7.773	8.2185	8.40972	8.23621	8.01659	8.23408	8.29719	7.72174	8.01767	7.48894	8.05305	8.06951	7.60299	8.32112	7.90843	8.42076	7.50797	7.70628	7.93104	7.94858	8.80557	8.12001	8.24216	8.07071	8.22209	8.01313	8.15689	8.13781	7.65234	8.60887	7.79963	8.2059	8.28707	8.24444	8.01547	8.23621	7.86567	8.62818	7.50506	7.72272	8.1712	8.39642	8.34974	8.49851
WWTR1	5.81508	6.10948	6.33205	5.65851	7.58329	6.52217	6.36116	7.5645	6.56565	6.5097	7.28843	6.42818	7.02263	7.02737	6.49038	8.34098	5.78019	6.40205	6.23349	6.49601	6.3509	6.70668	5.98297	7.02593	5.48769	6.57466	6.35402	5.8715	6.27435	6.02282	5.56448	5.87074	7.73629	7.43221	6.31764	6.02245	6.17655	5.77454	6.32814	6.19855	5.8536	6.1964	6.37099	7.42092	5.84302	6.72122	6.24951	5.73513	6.62529
WWP2	7.83144	8.25038	8.84955	7.7533	8.51442	8.30067	8.40106	7.93703	8.89941	8.33113	8.32487	8.13585	8.15381	8.20326	8.39484	8.0657	7.8416	7.9356	8.57333	8.75854	8.515	7.13494	7.80604	7.60126	7.60197	7.87687	8.5805	7.65377	7.7811	8.66724	8.34249	7.88569	7.34429	8.19879	8.60366	8.38137	7.96272	8.49863	8.88486	8.51136	7.87605	7.48863	8.86319	8.67225	8.49453	7.64333	7.95174	6.79481	8.67394
WWP1	10.0007	10.4295	10.335	10.0781	10.1837	10.0586	10.3116	9.89921	10.184	10.5703	10.2168	10.5391	10.5221	10.5921	10.2021	10.1355	10.6017	10.5208	10.3984	10.2262	10.0621	10.2548	10.2363	10.0478	10.3781	10.2548	10.2845	10.412	10.3884	10.4911	10.164	10.903	10.4459	10.2148	10.7429	10.3918	10.6375	10.1248	10.1797	10.3096	10.1011	10.4198	9.91112	9.94191	10.6024	10.5976	10.5117	10.4663	10.4771
WWOX	5.53746	4.86807	6.32647	4.44244	6.18349	5.71067	5.81362	6.23353	5.56606	5.28134	6.07194	6.37522	4.46898	6.05002	4.98811	6.07976	6.14385	5.62846	6.31419	5.64707	6.222	6.45536	5.79798	6.2661	5.14955	5.9462	5.95623	5.66579	6.09203	6.17834	6.02367	5.77781	5.83977	5.43186	5.57206	5.60859	5.35745	5.82181	6.25268	6.01661	5.58442	6.836	6.3901	6.09905	5.24503	5.13875	6.27363	5.48228	6.61492
WWC3	10.7176	10.5369	10.4446	10.4625	10.8856	10.3894	10.3041	10.6604	10.7496	10.3034	10.4731	10.6877	10.5747	10.3516	10.65	10.6119	10.3062	10.4226	10.5202	10.0543	10.6581	10.6026	10.1304	10.6072	10.0717	10.6156	10.4454	10.6026	10.5111	10.4223	10.3669	9.70006	10.856	10.8159	10.4989	10.4592	10.4441	9.79594	10.0023	10.4288	10.7395	10.7384	10.2121	9.63255	10.0881	10.5165	10.7145	10.2696	10.5039
WWC1	10.0191	9.76141	10.6553	9.9575	10.9849	11.0185	10.613	11.2915	10.6688	10.047	10.1193	10.1243	10.0382	10.1453	10.4274	9.72552	9.44224	9.86071	10.5591	10.1879	10.7158	10.4671	9.89402	10.4884	9.91157	10.9159	10.6607	10.0356	10.3799	9.89266	10.7478	7.91597	9.83834	9.68733	10.1301	10.5516	10.1533	10.2189	10.3141	9.88817	10.4774	9.87922	10.6126	10.3337	10.5038	9.03044	10.5842	9.45739	10.6478
WTAP	8.16898	8.89785	9.06462	8.99847	9.83485	9.236	9.11354	10.4161	8.01044	9.46868	9.27269	9.20184	9.11167	9.23294	8.85347	10.0257	9.07555	9.07611	9.12729	8.75537	8.80942	9.24761	9.01775	10.2006	9.06593	8.67614	8.83303	8.96877	8.97242	8.90685	8.80372	9.52759	10.1168	9.02714	9.3747	9.27207	9.30042	9.3403	9.0962	8.88257	9.0066	9.3282	8.99129	9.60553	8.74024	9.31575	9.00528	9.37026	8.5955
WT1	2.07112	7.3656	1.85178	8.59236	5.01521	7.88698	2.09007	2.2717	2.63886	5.77254	6.78392	2.02627	6.67578	2.98893	2.63886	6.1064	4.73203	2.03352	2.16657	1.87106	2.07692	6.75637	3.73878	3.64979	7.27224	4.92305	3.37721	2.32327	4.2105	3.7584	2.17559	9.33299	5.89965	2.06501	2.08316	6.40706	2.33961	6.67014	6.15786	2.21462	6.01292	3.38272	7.12331	2.18199	4.13114	1.84669	2.26564	7.01393	2.30964
WSCD2	2.3003	2.90455	3.24458	3.61992	3.42063	4.7291	3.40437	4.35744	2.36185	2.36185	3.04735	2.25925	2.90728	2.31391	3.57043	2.3074	2.59639	2.89888	6.22684	3.29693	4.25799	2.79953	3.39596	3.50205	3.65661	2.83546	5.95041	4.94335	4.20709	4.59155	3.60302	4.9393	4.86459	3.25992	2.26802	3.63658	2.48173	2.33125	2.17497	3.08133	2.76164	4.17414	2.83016	3.22942	3.43349	4.08517	2.926	7.75262	3.6795
WSCD1	5.38933	7.10483	5.7287	6.45218	6.24512	8.3319	5.9931	6.22808	6.92651	5.97219	5.7426	5.95151	6.06138	5.68503	6.3537	6.27961	6.20108	4.52477	5.8341	4.74628	7.10483	4.43152	5.68856	3.68338	5.96734	6.19589	5.90857	5.75096	6.33273	6.11171	4.71154	7.5041	5.95151	6.18112	9.26006	6.02257	6.30172	5.44895	4.86273	7.7096	6.30055	6.10586	6.57235	5.01759	6.48247	5.66824	6.6348	5.2767	6.15727
WSB2	10.6078	10.3459	10.3894	10.7515	10.5159	10.69	10.5075	10.8756	10.4935	10.4862	10.7029	10.5869	10.6473	10.7054	10.4281	10.5773	10.4518	10.7296	10.5075	10.3639	10.6638	10.8294	10.8586	11.1075	10.5227	10.5075	10.6011	10.8647	10.6879	10.4114	10.5618	9.97524	11.0102	10.5537	10.6801	10.3918	10.434	10.8723	10.3349	10.4518	10.6409	10.9053	10.4104	10.1226	10.4388	10.3016	10.6337	10.4247	10.6434
WSB1	12.2803	13.1703	13.2277	13.1205	13.5225	13.0677	13.4494	12.9936	13.19	13.3264	12.7268	12.7815	13.176	12.924	13.202	12.9664	12.6399	13.2248	12.9536	12.7035	12.7794	12.6868	12.8649	12.9862	12.4319	12.5174	12.9064	12.7775	12.6244	13.2078	13.361	12.8329	13.027	13.3462	13.3104	13.403	13.0507	12.3009	13.262	12.961	12.3945	12.9634	11.9887	12.6421	13.5055	12.9992	13.0161	12.3444	12.9664
WRNIP1	11.2192	10.543	10.4198	10.4275	10.3239	10.1237	10.1249	10.7909	10.5192	10.0304	10.4799	10.546	10.1807	10.5595	10.6528	10.4463	10.0896	10.5042	10.3033	10.5719	10.8372	9.96817	10.4704	10.3197	10.3691	10.6075	10.8956	10.515	10.3339	10.7104	10.5648	10.2634	10.5514	10.7097	10.8118	10.3296	10.6601	10.4302	10.1759	10.7658	10.7707	10.767	10.2727	10.4985	10.7462	10.5466	10.4136	10.3924	10.6781
WRN	8.81856	9.29198	8.79368	9.07881	9.01913	9.1826	8.58316	9.10962	8.92235	8.55752	8.57904	8.44412	9.18757	8.79859	8.96361	9.26398	8.8267	8.9334	8.8367	8.75018	8.31025	9.43826	8.73483	9.20112	9.02923	8.2307	8.68095	8.91702	8.4347	8.70515	8.73652	9.3924	9.36164	8.87955	8.89462	9.30676	8.856	8.48802	8.76216	8.71082	8.62014	9.033	7.64749	9.07513	8.70396	8.95286	8.57187	8.70458	8.34119
WRB	10.6561	9.21988	9.34057	9.27022	8.65769	9.15118	8.71244	8.67947	9.29939	8.9207	9.1211	9.34258	9.00653	9.04874	9.39383	9.00653	8.91206	9.38264	9.28769	8.62267	9.25658	9.36071	8.70382	8.88923	9.55877	8.92523	9.11611	9.3712	9.35278	8.90746	9.608	9.34385	9.30879	9.7316	8.90882	9.1678	9.22835	8.72443	8.67688	8.95888	9.72016	9.47933	8.60076	9.88089	9.3512	9.21716	8.856	9.2327	9.02977
WNT9B	2.72748	2.4311	4.03707	2.41424	4.25906	4.62527	3.62308	4.2151	2.88557	2.95531	2.36037	2.93208	3.20422	2.73285	3.18667	2.98441	2.93208	3.43233	2.79837	2.37915	3.10043	2.71696	3.27257	2.97491	2.9581	2.68865	5.17807	4.27489	3.17518	2.71396	2.9777	3.32642	4.30144	3.84863	3.33183	2.64919	3.4145	2.99362	3.77173	2.93935	2.34653	2.69132	2.93208	2.57201	2.74027	3.81114	3.06512	2.39716	3.16859
WNT8A	2.8833	2.93983	2.85527	2.92072	2.83509	4.14841	2.9602	2.89374	2.96167	2.95546	2.90314	3.00467	2.90402	2.95832	2.94911	2.94755	2.91928	2.90797	2.92532	2.86494	2.96998	2.94832	3.5744	2.9971	2.89207	2.81644	3.31144	2.88852	2.9249	2.88364	2.98114	2.9383	2.88605	2.88696	2.93204	2.91992	2.91372	2.91734	2.88979	2.90917	2.91025	3.63595	2.90565	2.90358	2.88219	2.81338	7.75836	2.81985	2.89112
WNT7B	3.92925	2.8964	3.24625	2.93242	3.19589	4.4653	2.99232	4.04915	3.17829	3.00629	2.92092	2.99096	2.95609	3.578	3.97074	3.00629	2.96752	3.23633	2.96558	5.96831	3.99214	2.89831	3.14888	3.00767	3.26255	3.00138	2.74237	2.88006	3.6695	2.97465	4.08444	2.99914	3.29303	2.9139	5.24566	3.28413	3.78511	3.01288	2.97352	3.02458	2.91568	2.98007	2.95384	4.00547	2.94203	3.84384	4.31576	2.91723	2.96825
WNT7A	6.86127	6.0043	5.60824	5.43596	6.32843	5.8788	6.54815	6.331	6.13921	6.13371	6.80059	6.78056	4.54149	5.78102	6.52199	6.78581	6.15213	6.41018	7.19345	6.04574	7.53234	5.62448	5.84773	5.74056	5.82484	7.96434	7.23385	6.50845	6.20782	6.75821	6.86958	1.6674	6.14564	5.78684	6.93368	6.06334	6.62218	5.26363	4.9186	7.09622	6.81416	6.08802	6.47104	4.52107	5.64223	6.26311	6.91244	6.71624	7.36058
WNT6	5.99278	4.31363	4.545	4.11445	4.07116	4.21073	4.61173	4.1014	5.3873	4.51181	4.92113	5.28572	4.81571	4.36466	4.95023	4.53624	6.14194	3.98166	4.38826	5.16481	4.06985	5.53768	4.42532	3.92868	5.0315	4.30999	3.76928	4.60753	5.37104	4.00776	4.63463	7.09723	4.21443	4.38936	4.61915	4.45963	4.74829	5.1674	5.25672	5.05223	4.24972	5.14187	5.76495	4.29377	3.61846	4.72325	5.52895	5.49984	4.95221
WNT5B	8.28481	6.42066	6.04141	6.48932	6.07153	6.25785	6.17627	6.1753	6.76303	6.1946	5.84562	6.10522	6.62492	5.19315	6.96868	7.03621	6.61887	6.02698	6.58128	8.07991	6.65932	6.16709	6.92549	5.92619	6.72686	6.47573	6.57966	6.14568	6.27089	6.41557	6.88467	6.96795	5.84562	7.16056	6.13715	6.52187	6.03927	5.76838	6.87126	6.2075	6.88007	6.9239	7.23125	7.17973	6.57723	6.40919	6.68728	6.87439	6.90403
WNT3A	9.55268	8.07842	8.25403	8.78177	8.74793	7.80269	9.76007	9.19937	9.41818	9.58924	9.40466	10.5844	5.91338	9.06406	10.2614	9.97711	9.1501	10.0706	10.4546	9.90713	10.1577	8.63697	8.26824	9.45961	8.60716	11.0039	10.793	10.2226	9.50112	9.69786	9.90603	1.82474	9.29923	9.98626	10.0744	8.64004	9.85165	7.30354	7.28922	10.6706	9.45383	9.20306	8.88641	6.88363	9.18629	9.38558	10.2621	10.3395	10.393
WNT3	4.97372	5.59271	5.27249	5.74061	5.38139	6.28904	5.7263	5.24704	5.69077	4.63505	5.4377	4.63598	6.25737	4.57809	5.40538	5.15782	5.50135	5.44301	5.82715	5.74061	5.49605	6.08417	5.38978	4.75717	6.8745	5.98832	5.59141	5.32038	5.33248	5.67163	4.60875	5.73328	5.88811	5.01401	5.16229	4.96825	4.86534	5.16308	5.73916	5.40193	4.726	5.02497	6.24196	5.02232	5.0702	5.27907	4.7491	4.79407	5.89989
WNT2B	5.63013	5.71458	4.72994	5.44957	5.27761	5.88123	6.05457	5.4958	5.17342	5.53016	5.4053	6.4508	7.10835	5.40671	6.11645	6.15727	6.27639	5.84643	7.15613	6.47298	6.12732	6.19159	6.41833	6.08737	5.13782	6.00951	8.01571	6.30924	5.61169	5.53161	5.25536	6.32575	7.89477	5.37556	6.15614	4.18206	5.65201	4.80316	4.88704	6.3268	6.36391	6.01558	5.87082	5.22763	5.04934	6.42326	6.06097	8.84906	6.23907
WNT2	6.19228	8.2962	7.36074	7.88291	9.21332	8.14177	8.08039	8.55317	7.40748	9.38947	8.61241	8.33415	8.66959	9.40102	8.02818	8.28551	8.63829	8.41954	8.89203	7.1999	8.49543	7.64197	8.95358	8.89655	8.20788	8.26319	8.68539	8.4617	9.36558	8.86399	7.56196	6.446	8.88442	7.29259	7.7813	9.24205	8.28024	7.2339	7.32517	8.85444	7.45349	8.64837	8.32577	6.80276	8.51151	7.9914	7.97018	8.25767	9.19844
WNT11	6.38312	7.70211	5.79498	6.85873	7.65761	7.19611	6.76298	6.44924	6.82763	7.14632	6.61138	6.83412	5.30602	6.79149	7.09361	6.99756	7.26659	6.97871	7.38193	7.02291	6.68879	6.83165	7.15413	7.73776	7.39268	6.44019	6.89443	6.94403	7.78646	7.42793	6.77867	9.71305	7.95076	5.62478	6.20102	7.66427	6.96767	6.75641	6.63849	6.82002	7.57083	7.24736	7.52874	5.61979	6.82375	7.30935	6.76243	8.04541	8.0639
WNT10B	4.24937	4.86872	3.88454	3.87505	4.54363	3.89361	4.70416	3.89839	3.52124	4.39304	3.04209	3.79139	4.89451	3.35227	3.89053	3.92707	5.09691	3.94985	4.39578	4.29391	3.70822	3.71504	4.48291	4.60227	4.33922	3.29875	3.25214	3.96555	4.36989	4.38909	4.89673	5.44087	3.70577	3.95404	4.79792	3.90728	4.94128	5.39189	5.11247	4.86266	4.64107	4.58458	4.3822	4.69738	3.28501	4.79107	4.35856	4.59079	3.7961
WNT10A	5.43784	6.10394	5.17552	5.16871	5.35627	5.75171	4.98432	4.51981	5.57019	5.79767	5.3002	4.36767	5.62895	4.15933	4.76587	5.24617	6.62367	4.34091	4.64152	7.02588	4.15996	5.19786	6.5834	6.06981	6.54511	4.45856	5.04906	4.90174	6.8111	5.15785	5.62424	5.62005	4.62081	4.65685	4.67747	5.13873	5.77533	6.78567	6.02646	4.48556	6.24952	6.80091	6.79742	6.25862	5.40368	6.11027	4.44029	5.80205	5.97387
WNK4	3.31462	3.10242	3.92831	3.82481	3.76125	3.57484	3.66847	3.56905	3.21153	3.27594	3.72629	3.9214	4.03094	3.49565	3.9635	3.93595	3.95915	4.2035	3.11603	3.2252	3.7167	2.98635	3.05454	3.97187	4.41233	4.29435	3.91651	3.81751	4.10299	3.60405	3.51706	4.85738	4.46264	4.31753	3.54582	3.36267	3.30464	4.11472	3.43185	3.54582	3.1072	3.64183	4.05076	3.59333	3.39749	4.36922	3.8061	5.53807	3.34513
WNK3	5.29803	4.75801	3.26466	4.56708	5.2286	5.20822	3.30722	4.63473	4.41217	3.48248	3.60835	4.95214	4.57756	3.5687	4.11732	5.76216	4.25405	3.25379	4.30882	3.62502	4.34379	5.11436	3.6527	4.46137	4.39934	3.54271	4.04663	4.29681	4.39229	3.80521	3.71695	4.65059	5.09349	4.44021	4.48363	3.9889	3.852	3.9545	4.69462	4.82181	3.67409	4.82014	3.75008	4.53496	3.47982	3.63645	3.48932	4.56482	4.33449
WIZ	7.89219	7.99287	7.69611	8.0081	8.12656	8.09967	7.79978	8.24606	7.99749	7.9247	7.68058	7.96308	7.95557	7.82737	7.90459	8.09305	7.9516	7.75653	7.98542	8.00358	8.14067	8.1158	7.97232	8.29424	8.06228	8.0708	8.13561	8.22261	8.06136	7.97602	7.9027	8.23994	8.26183	7.67107	8.09305	7.90749	7.78162	8.00508	7.55017	8.19421	8.33069	8.05104	7.91687	7.759	7.60648	7.62853	7.97898	8.00358	8.1961
WISP2	13.2655	13.1928	12.0697	11.5424	11.3817	10.2357	10.8646	11.0785	12.0781	11.8181	11.6616	11.6052	12.0992	11.8391	11.8109	11.3517	12.5889	11.5486	12.0952	10.8929	12.3389	11.1769	11.7865	11.4354	12.3305	13.1232	11.8652	11.9676	12.2056	12.4925	11.4154	13.2053	10.4051	11.6088	10.9316	10.9174	12.3953	11.0843	11.8255	13.3263	11.5994	11.5649	12.5813	11.3291	11.2837	11.9893	11.8916	12.7475	12.7505
WISP1	3.79509	5.1938	4.96231	5.3004	5.57441	6.84721	3.33877	5.10663	3.58323	3.87303	3.19225	3.50085	6.71994	3.43911	3.55006	4.87867	4.04917	3.2726	3.5264	3.53373	3.57022	4.46785	4.40723	6.38506	3.33877	4.05791	2.97656	3.18535	3.40247	3.54531	3.52923	4.22508	4.33915	3.20837	4.31843	3.76914	3.26323	4.52149	4.03484	3.62835	3.60191	4.69877	5.2885	5.07627	3.49027	3.22613	3.32961	3.71005	3.69442
WIPI2	8.81263	8.8675	8.82873	8.76418	8.70148	8.77207	8.50649	8.32854	8.82966	8.66673	8.58452	8.93136	8.66092	8.86519	8.87381	8.57748	8.85472	8.83205	8.87438	8.69444	8.85472	8.56565	8.74056	8.28337	8.96219	9.38688	8.99398	8.48676	8.83047	8.90287	8.5147	9.02887	8.57404	8.29707	9.2816	8.14323	8.9206	8.98097	8.99224	9.08412	8.83102	8.50045	9.25908	8.58096	8.84364	8.88303	8.98217	9.07926	9.00135
WIPI1	10.7523	10.3468	10.2311	10.4358	10.592	11.1186	10.1529	9.97232	10.1734	10.2489	10.1753	10.786	10.9572	10.5476	10.3527	9.76244	10.2896	10.7915	10.2523	10.3123	10.2532	11.3968	10.4931	10.7523	10.3811	10.1596	10.1549	10.3493	10.4821	10.2937	10.3856	10.3088	10.3146	10.718	9.96223	10.3699	10.3406	10.4201	10.7937	10.516	10.2993	10.7099	10.3319	11.3562	10.207	10.3061	10.413	10.617	10.3309
WIPF2	6.09098	5.97626	6.32427	6.19108	6.38816	6.13058	6.41251	6.52282	6.18874	6.36752	6.48237	6.67735	6.03908	6.31878	6.28854	6.86604	6.15108	6.2806	6.21821	6.08596	6.8122	5.77698	6.22928	6.39312	6.06285	6.91499	6.68199	6.43849	6.48063	6.30648	6.39675	6.19543	6.16238	6.17734	6.70645	6.21945	6.47011	6.61715	6.25539	6.52503	6.40905	6.32688	6.745	5.79508	6.0552	6.35794	6.767	6.22928	6.60742
WIPF1	7.03856	7.5438	7.35107	7.61742	7.45416	7.11432	8.44655	7.76824	7.55684	7.96676	8.15861	7.98044	8.23549	7.88588	7.34233	8.64072	7.70415	7.62802	7.40625	7.24392	7.27707	8.08864	8.36703	7.67224	7.78579	7.71771	7.50691	7.25271	7.68378	7.79255	7.87496	7.87567	7.05662	7.92037	7.34942	6.9149	7.89482	8.99786	8.34982	7.52108	7.47671	7.66856	8.54423	8.03051	7.48692	8.51694	8.11485	7.69915	7.56067
WIF1	11.5608	9.69421	11.1424	10.8989	12.4583	10.9379	11.1896	10.9198	11.1864	11.6004	11.3092	11.3403	10.2632	11.436	11.1959	10.4361	10.358	10.9869	12.2855	10.8533	12.8927	10.1219	10.6983	11.7631	10.794	11.8636	11.4436	11.1132	11.2176	10.504	10.8499	5.09301	10.9255	11.9213	12.1532	11.7705	11.8882	9.33759	11.0093	11.7308	11.5161	11.188	10.1059	10.6566	11.99	9.41201	11.8307	10.0732	10.7774
WHSC2	7.43649	7.63833	7.32838	7.61349	8.0591	7.19618	7.87195	7.87306	7.55007	7.54365	7.64798	7.9372	7.49658	7.60535	7.62198	7.55801	7.75875	7.55189	7.49953	7.51661	7.51186	7.27454	7.63418	7.90438	7.48018	8.0823	7.56452	7.60535	7.88998	7.73972	7.42425	7.58701	7.89928	7.83693	7.91436	7.5602	7.77651	7.80604	7.89949	7.90438	7.71062	7.85236	8.07345	7.89949	7.56052	7.70711	7.85893	7.52504	7.84058
WHSC1L1	5.22218	5.79373	5.76773	5.65968	5.899	5.45538	5.90327	5.78387	5.68343	5.73334	5.78814	5.96921	6.10923	5.65521	5.29645	5.35137	6.01569	5.51242	6.70739	5.85818	5.88499	5.31433	5.55152	5.38454	4.76012	5.38454	7.30453	5.61837	5.47843	6.10789	5.46425	6.06857	7.06026	5.66109	6.06602	5.40687	5.96758	5.48128	5.93322	6.13058	5.26341	5.37891	6.17938	5.76923	5.80259	5.84153	5.34794	5.632	5.85219
WHSC1	3.22714	2.96569	4.19116	2.80277	4.05804	4.49271	4.23291	3.06934	3.55522	3.35879	3.08321	3.41605	3.67561	3.50383	3.76775	3.29411	3.61955	4.03389	3.95215	3.39686	3.91239	3.48126	3.60669	3.37798	2.49804	3.14734	4.09092	2.6416	3.35362	4.38906	3.4782	2.92275	4.52368	4.03818	4.39822	3.69279	4.51044	3.86127	5.08904	3.63859	3.63859	3.21284	3.90405	4.17678	4.03818	2.81983	3.91683	3.28339	4.2045
WHAMM	7.9968	9.25094	9.28339	8.9063	9.50982	8.93105	9.26446	8.376	9.15089	8.70058	8.81491	8.50013	9.21882	8.9983	9.3531	8.71741	8.85697	9.13107	9.13732	9.34203	8.81075	7.79992	8.83338	8.69453	8.65796	8.92821	9.34512	8.89263	8.99738	9.18408	9.01716	8.72702	8.91385	8.93522	9.21654	9.01269	8.87873	8.78194	9.45449	9.50746	8.32089	8.43828	9.01332	8.69402	9.65635	9.02793	8.94381	8.30801	9.26775
WFS1	11.8699	11.1926	11.1835	10.7028	11.1919	11.3898	11.2868	10.5182	11.3884	11.4694	11.5546	11.5903	10.1791	10.9991	11.5321	11.6769	11.2442	11.5191	11.7207	11.3894	12.3744	10.2551	10.9804	10.6994	11.4214	12.5491	11.8495	11.4063	11.6135	11.7442	11.5579	10.4402	10.6007	11.2375	11.8244	11.3856	11.4067	10.5422	10.1257	11.3813	11.3596	10.9505	11.5119	10.4938	11.326	11.1693	11.7618	11.6398	11.5313
WFIKKN2	2.12219	4.35075	4.69953	5.23656	1.65564	3.57293	2.19041	1.62474	3.16243	2.94966	2.44695	2.98776	1.69407	1.59304	4.03255	5.50137	1.73399	1.46532	3.9531	1.40635	2.85258	1.65278	4.36621	1.63683	3.88311	1.64573	2.65156	4.55912	5.01057	4.38929	3.01068	3.17607	4.7621	1.77659	4.11871	3.69031	3.00193	1.6815	1.68247	3.88075	1.41041	4.12946	3.49466	1.65081	2.38885	5.29608	2.81426	2.71491	1.82052
WFDC6	9.41344	2.51	3.02143	5.38275	3.3665	2.59047	2.44405	4.4547	4.57076	2.82976	2.55926	2.7399	2.61514	3.19544	5.987	2.65535	2.73279	3.53456	2.75958	3.54329	2.646	3.09521	2.36041	3.05045	5.4205	4.63197	3.76646	3.75525	2.29638	3.27455	7.95003	2.64531	2.58912	6.32493	3.22109	3.92079	4.22508	3.05306	2.4199	2.8317	5.62679	2.66182	2.69513	7.53341	4.69801	2.79578	2.51538	2.49517	2.81075
WFDC5	2.31225	3.00613	3.96967	2.78832	2.9209	4.16698	4.43758	3.67035	2.04874	3.18014	3.21831	1.59536	4.11127	1.66998	3.40046	4.13734	4.22451	2.5247	4.85126	5.04241	3.37471	2.86046	2.92695	2.88286	2.71579	4.40105	4.58539	4.47643	3.30129	3.61276	3.41529	2.09563	2.67	2.94055	2.79862	3.96757	3.20171	3.00902	3.84897	4.53087	3.11621	2.20637	3.64071	2.91829	2.71058	3.6633	4.26984	4.86667	1.73558
WFDC3	6.86239	6.34922	6.32104	5.69271	6.92601	6.6926	6.75442	7.11467	6.01299	6.88642	5.93454	6.68951	6.69793	6.53258	5.82647	6.25323	6.86549	6.56933	6.62735	6.50723	6.37215	6.64386	6.07532	6.73408	6.02567	6.89954	6.34169	7.11413	6.90219	6.50955	5.8744	6.27247	7.1798	5.8161	6.41944	6.51936	6.19653	6.53195	6.24718	6.71013	5.89801	6.36898	6.59902	6.8716	5.96568	6.75496	6.39096	7.08671	7.17104
WFDC2	10.8157	8.02381	10.444	8.57131	8.90783	10.1538	9.11335	8.5154	10.0117	9.09596	8.83253	8.26794	9.92654	9.24873	9.24592	7.51486	8.52464	8.59166	8.94938	10.3673	8.83773	11.6128	8.86427	9.16003	9.13213	8.6999	8.38111	8.81912	9.24476	7.6581	10.2799	4.25088	8.82403	10.5736	8.2003	9.70847	8.6377	10.0039	10.0442	8.03547	9.14791	8.48186	9.74433	12.5524	9.58888	8.09707	8.62106	8.38111	9.05209
WFDC13	2.39597	2.38166	2.36395	2.39559	2.29355	2.40081	2.36682	2.37673	2.35895	2.31608	2.37673	2.34597	2.35467	2.37673	2.35829	2.37119	4.24733	2.40044	2.40746	2.48926	2.3122	2.31785	2.23955	2.34597	2.32785	2.39736	2.64357	2.28462	2.34695	2.46075	2.33055	2.33274	2.32516	2.39469	2.37345	2.35829	2.35829	2.32276	2.36395	2.34446	2.34216	2.34368	2.40006	2.42853	2.40664	2.3429	2.38166	2.32446	2.32691
WFDC12	3.24489	1.84615	3.56215	1.8489	5.64382	3.31232	3.37601	4.48119	3.27425	2.08379	4.18076	3.25694	2.39927	3.12494	2.98235	3.08899	4.03697	2.09882	4.90566	1.96563	2.95834	1.93015	1.99158	3.31774	1.83331	1.93824	4.08093	3.41642	2.52056	3.17598	2.07433	2.00154	4.59878	4.11867	1.90576	2.51807	3.69701	2.02053	4.15432	3.55142	3.04746	1.9405	3.31232	1.89424	2.24256	2.7566	5.1482	3.1595	3.33971
WFDC10B	4.23546	3.18731	5.61053	3.75773	5.23985	4.80814	3.2975	4.19998	4.59795	5.43439	3.43635	5.20211	3.32076	3.31546	3.7428	5.11432	3.46924	2.11666	4.38353	3.47171	5.22442	4.47313	3.00048	3.9728	4.06786	4.54143	2.32551	4.286	4.83361	3.9144	4.23913	4.98041	4.86106	4.18512	4.6998	5.44945	4.99421	4.10191	5.27746	4.87137	3.26716	4.3922	3.93204	4.00772	3.91063	5.07582	5.18703	3.91258	4.66645
WFDC1	9.0187	9.38364	9.44126	9.27661	8.2974	7.74958	8.81161	9.12332	9.43784	9.06387	9.18545	9.97771	9.94922	9.77595	9.83072	8.78254	9.72173	10.4093	9.8674	9.22075	9.28199	7.59578	9.37755	9.43485	8.18386	10.1762	9.85691	9.60861	9.11127	10.3413	8.62944	6.28836	9.74874	9.46449	8.79655	8.77717	9.28742	6.36145	6.9395	9.87127	9.06262	8.93058	8.9255	7.88769	9.38789	10.101	9.06387	9.03662	9.35906
WDYHV1	8.45823	8.52317	8.04643	8.66784	8.75239	8.69736	8.03739	8.92564	8.66084	8.66369	8.69286	8.44585	9.12671	8.56329	8.01698	8.62421	8.26589	8.18239	8.34553	8.49484	8.104	8.43306	8.49484	8.84123	7.95638	8.38655	8.33558	8.48849	8.37934	8.41339	8.21453	8.97175	8.93006	8.51654	8.55943	8.4849	8.22229	8.32261	8.60583	8.25439	8.49484	9.07536	8.59815	8.69417	8.1474	8.62904	8.51533	8.19965	8.16099
WDTC1	5.45721	5.45269	6.66198	5.20209	6.22678	6.34104	7.18806	5.65315	4.93985	6.79745	5.53422	6.07693	5.64495	6.15764	5.3377	5.7501	6.58429	5.86803	5.78669	6.79745	5.81898	6.13497	5.76922	6.23997	6.14081	6.83697	5.88442	5.93555	6.38792	5.82285	5.51358	6.12206	5.64569	5.36756	6.11409	5.3005	5.58185	7.20758	7.13903	6.38144	5.20676	5.33377	7.10406	6.61193	6.08426	6.32921	6.63561	6.40868	6.869
WDSUB1	9.26874	9.08999	9.05632	9.16364	8.6584	8.46387	9.31339	8.9537	9.46564	8.9899	9.23325	9.14872	8.55022	8.9753	8.75273	8.66271	8.4923	8.89571	9.23325	9.1441	9.26094	8.13018	8.72245	8.27359	8.31334	8.88754	9.48056	8.77889	8.68029	9.21982	8.81446	8.63361	8.05757	9.12231	9.10574	8.54585	8.6405	8.94822	9.21728	9.08817	9.05587	8.63112	8.81163	8.02777	8.86626	8.61498	9.09553	8.71702	9.14097
WDR92	8.93732	8.46937	8.69336	8.48655	7.85828	8.46219	8.82042	8.07411	8.92632	8.29637	8.45469	8.06796	8.37841	8.36345	8.75143	7.29279	8.66564	8.32353	8.43375	8.80725	8.59101	8.10879	8.64849	7.68253	8.67375	8.74259	8.67275	8.32498	8.25791	8.55761	8.85586	8.35617	7.48002	8.51242	8.59518	8.31363	8.44119	8.3762	8.51048	8.38051	8.65164	8.27551	8.58926	8.61994	9.02307	8.32991	8.18662	7.96956	8.72456
WDR91	9.40743	9.63252	9.68972	9.74412	10.1849	9.84502	9.4009	8.52528	9.64886	9.80437	9.84335	9.94921	9.82641	9.97695	9.93596	9.25675	9.81097	9.74412	10.0805	10.2628	10.16	9.98357	9.55261	9.83135	9.68673	10.2157	10.1048	9.78356	9.89448	10.2053	9.82641	9.02021	9.49885	9.75402	10.0974	9.94715	9.66842	9.37271	9.74018	10.0825	10.1289	9.82571	9.50887	9.57963	10.2072	9.70741	9.61259	10.1699	10.4743
WDR90	11.3334	9.54168	9.82171	9.77849	9.88619	9.36115	9.0082	9.24921	9.82837	9.53563	8.85551	9.43911	9.23526	9.18513	10.0345	9.27601	9.39565	9.46505	9.52075	9.44419	9.56053	9.87087	8.98494	9.57741	10.1273	9.78867	9.56053	9.72534	9.52658	9.32119	10.4373	9.69783	9.58219	9.99697	9.93189	9.50017	9.54119	9.54567	9.29139	9.37074	10.3366	8.94584	8.98814	10.72	10.0889	9.23156	9.66724	9.60187	9.62996
WDR89	3.66283	4.89328	5.46055	4.99544	5.68964	5.59363	5.77299	6.08683	4.04855	5.17186	5.32179	5.73778	5.07755	5.65131	5.0375	3.77648	5.75584	5.64862	6.00857	4.58403	5.27244	4.81998	5.95092	6.30454	5.25518	5.18036	4.62614	5.56019	5.74873	5.19944	5.45649	5.9907	5.91702	4.60584	6.22331	5.45802	5.88883	5.34302	5.67543	5.91702	4.66679	5.73246	4.60704	4.54204	5.36073	5.65628	4.88976	6.11206	4.36437
WDR88	2.71763	2.78927	2.6977	2.74356	2.81254	2.73994	2.80326	2.74219	2.77184	2.80424	2.75778	2.82801	2.75591	2.79457	2.79351	2.78556	2.72965	2.73905	2.68481	2.67707	2.83849	2.72782	2.69863	2.85594	2.72545	2.67513	2.55459	2.68816	2.75591	2.71117	2.80808	2.79253	2.70552	2.73789	2.7914	2.77055	2.74116	2.72545	2.72545	2.77184	2.76959	2.78133	2.72658	2.71017	2.70831	2.67293	2.75778	2.63558	4.66138
WDR87	2.62226	2.55234	2.63172	2.6066	2.55451	2.61066	2.62151	3.14751	4.05124	2.59386	2.64307	2.54167	2.64021	2.57507	2.58625	2.5883	2.61066	2.62479	2.62899	2.64021	2.54496	2.56211	2.51994	2.56698	2.62399	5.1708	2.911	2.55672	2.58281	2.69208	2.5998	2.6157	2.57141	2.69625	2.67173	2.61147	2.65016	2.58625	2.72784	2.66021	2.5805	2.60151	2.62565	2.64864	2.69783	2.67173	3.00561	2.62399	2.62737
WDR85	7.31919	6.90859	6.87148	7.10178	6.80262	6.79493	6.70842	7.16382	7.18059	6.56614	6.84034	6.77942	6.9333	6.51833	7.00335	6.59238	6.68458	6.69255	6.67879	6.81954	7.07544	6.89374	6.90375	6.50222	6.87234	6.91305	7.03715	6.87802	6.62385	7.11428	7.00539	7.01498	6.87689	6.89545	6.90053	6.90611	6.826	6.97687	6.96766	7.09096	7.20535	6.96905	6.98938	6.6517	7.08545	6.8509	6.78964	6.61016	7.09503
WDR82	9.79782	9.86767	9.92413	10.1269	10.1703	10.0969	10.407	10.4011	10.3114	10.0426	10.1533	9.82172	10.2127	9.84084	10.0296	10.0248	9.91271	9.60194	10.0142	10.1225	10.1593	9.03933	10.2887	9.94406	9.96807	9.62707	10.1191	9.57322	9.75354	10.304	9.57486	10.3459	10.1191	10.1219	10.3993	10.1582	10.0057	10.3347	10.2778	9.86627	10.2263	9.89622	10.7444	10.1125	10.2032	10.1764	10.0296	9.62061	10.2055
WDR81	10.3756	10.455	10.2617	10.4705	10.5201	10.7043	10.479	10.2713	10.5062	9.84787	10.5638	9.97361	10.6933	10.494	10.3203	9.84201	10.4464	9.82396	10.3558	10.1582	10.1936	10.6981	10.3706	9.85065	10.4201	10.2248	10.2148	10.4586	10.5201	10.3594	10.4362	10.3938	9.78059	9.86724	9.99425	10.0664	10.124	11.0556	11.0096	10.123	10.3903	10.3826	10.8059	10.285	10.1964	9.90711	10.6503	10.3568	10.3706
WDR78	9.44062	5.87668	7.42062	6.47185	5.6539	5.39573	5.36069	5.93585	7.12905	6.09278	5.07393	5.73162	4.84579	5.69641	7.4777	5.0866	5.10379	6.37348	5.80193	5.89127	5.78192	6.75491	5.63065	5.42915	6.80071	5.96968	5.91922	5.85387	5.15572	5.6539	8.28721	6.37702	6.21369	8.19525	4.81941	6.15012	5.97329	4.34155	5.3855	5.40557	7.07816	5.80078	4.93288	9.21377	7.86223	5.97219	4.88361	5.28724	5.45865
WDR77	8.42072	8.26684	8.26292	8.53169	8.5893	8.26631	8.36904	9.55125	8.41477	8.23289	8.4958	7.83159	8.55105	8.44069	8.39017	8.27534	7.91494	8.24623	7.81555	8.56394	8.32208	8.54382	8.63123	8.686	8.27554	8.31472	8.16245	8.13651	8.09355	8.18826	8.55284	8.24678	8.55853	8.53054	8.56047	8.52063	8.22267	8.7457	8.52962	8.12994	8.53169	8.54603	8.51339	8.73279	8.3842	8.20194	8.34627	7.92361	8.32238
WDR76	3.66312	3.56541	3.43134	3.52628	4.41365	4.7746	4.865	3.69582	3.62586	3.99467	4.60434	3.98855	4.08253	3.79326	3.32257	4.52989	4.85425	3.70517	3.74253	3.80496	4.2267	4.11588	4.43263	4.04002	4.14637	3.68647	3.71996	3.54974	3.85738	4.04289	3.70902	4.19933	3.2905	4.52442	4.61295	4.20249	4.25158	5.46029	4.12677	3.89213	4.28371	4.0108	4.82321	4.2502	4.0531	3.71085	4.47622	3.37232	4.60743
WDR75	9.52345	9.99244	9.67677	9.92247	10.3645	9.61049	9.58718	10.4913	9.66897	9.77899	9.60966	9.6234	9.82177	9.77792	9.86782	9.56744	9.48761	9.74434	9.41649	10.044	9.60352	9.71709	9.85659	10.0211	9.60194	9.17366	9.72764	9.45052	9.41278	9.71613	9.71219	10.2456	10.2516	9.75871	9.84727	10.0318	9.84887	9.78149	9.89577	9.66135	9.65103	9.97213	8.68204	9.9635	9.7822	9.78507	9.49192	9.41329	9.23601
WDR74	8.74302	8.78753	9.07723	8.62681	9.59199	9.23862	9.01771	10.1984	9.20585	8.779	8.96754	8.65658	8.89815	8.67533	8.97	8.88437	9.33446	8.33252	8.98751	9.17069	8.78291	8.63342	8.68507	9.33819	9.264	9.00605	8.76852	9.00341	9.14304	8.70827	8.69933	9.16092	9.52488	8.50658	8.90841	8.71188	8.90618	9.08515	9.17499	8.89726	8.92788	8.67218	9.37533	9.57625	8.76385	8.89327	8.9509	8.9716	9.08963
WDR73	9.94706	9.17018	9.39329	9.37275	9.25286	9.32612	9.23329	9.23866	9.56702	9.03679	9.09673	8.91608	9.24629	9.1169	9.55966	8.52968	9.32237	9.27696	9.56779	9.33345	9.2904	9.34111	9.06166	9.11086	9.31384	9.37237	9.30508	9.31008	9.27797	9.11654	9.66976	8.87585	8.95136	9.38016	9.41988	9.12701	9.29273	9.23715	9.2038	9.27527	9.53475	8.99698	8.90684	9.65733	9.59799	8.85309	9.28738	9.11219	9.30958
WDR70	9.76019	10.0337	9.98877	10.0447	9.86555	10.3525	9.88048	9.47967	9.94413	9.77323	9.61608	9.93988	9.97432	9.91795	10.0473	9.4981	10.1818	10.1254	10.3213	10.4789	9.83663	10.3234	9.79377	9.77615	9.97782	9.50731	9.83189	9.93238	9.75693	9.91853	10.1323	10.2888	9.69477	9.65132	9.83914	10.0549	9.92415	9.79601	9.87214	9.98327	9.97968	10.0948	9.78138	9.54298	9.87596	9.8825	9.73878	9.84418	9.59581
WDR7	9.38853	9.3687	9.45973	9.2311	9.20299	9.32248	9.45736	9.05416	9.37182	9.30552	9.72452	9.48211	9.47539	9.83415	9.4007	9.12448	9.37517	9.72007	9.45354	9.5497	9.42319	9.81118	9.44241	9.28077	9.28938	9.23549	9.46801	9.2681	9.31656	9.50018	9.42948	9.16087	8.83727	9.35633	9.34593	9.27855	9.30932	9.81058	9.64791	9.57237	9.24047	9.18416	9.24325	9.28673	9.50435	9.27036	9.64679	9.56441	9.27927
WDR69	9.92349	4.55497	7.99306	6.98735	6.21771	5.10855	2.84372	6.32801	7.63926	6.6252	5.04325	3.93122	4.86776	6.06632	8.10005	4.20681	2.86779	6.68544	4.66236	5.788	1.91179	7.22923	4.54099	5.84578	7.95189	6.56797	6.3896	5.87621	1.90675	4.74693	9.32341	4.94005	6.13156	8.60004	6.06741	7.02785	5.6055	4.44506	4.76883	3.13348	8.33712	4.6261	4.26007	9.73756	7.69781	5.58265	5.04428	6.03353	2.4406
WDR67	8.2778	8.38961	8.45149	8.61237	7.38131	8.26094	8.63462	7.30324	8.14888	7.79279	8.45312	8.00502	8.2682	8.61171	8.05637	7.24797	8.49632	8.39957	8.31529	8.02219	7.80787	8.43258	8.52883	7.34166	8.02135	7.44103	8.51715	8.3709	7.45961	8.55591	8.70179	8.10676	7.00139	8.00436	8.14349	8.22523	8.59901	8.61171	8.49527	7.87075	8.10125	8.31866	6.69077	7.61505	8.41742	8.39983	8.35261	8.06716	7.35027
WDR66	10.5993	5.03278	8.4869	7.51889	5.60221	4.58367	4.33282	5.99221	7.49698	5.43201	4.41111	4.58367	3.87249	5.92707	8.14441	5.61768	4.70237	6.67533	5.10437	9.65674	4.85514	7.16391	4.34652	5.39128	8.19806	7.06368	6.17021	6.66076	4.36027	5.37374	9.27976	5.85678	5.73017	8.71575	5.92233	6.80568	6.27516	5.12724	3.77863	4.3527	8.15919	5.04682	4.36237	9.82235	7.83447	5.64428	5.55096	4.86752	4.33706
WDR65	7.64214	3.00539	4.52945	4.9874	2.12063	2.31299	5.61807	3.85218	4.89797	2.39472	2.24097	2.35713	3.24422	2.34462	4.08327	2.39754	2.40374	3.34176	2.30371	3.86045	2.36197	2.30195	2.38037	2.38906	5.17114	2.39931	1.90723	2.38454	3.15386	3.03864	5.65492	2.34843	2.19298	6.1064	2.28625	3.83133	2.19393	4.34197	2.67776	2.3064	5.95482	2.2826	2.47108	6.6997	5.44525	2.16877	2.63199	2.23597	2.46915
WDR64	1.90679	3.80454	5.09397	5.84608	2.26792	3.5994	2.42316	3.65734	2.18655	4.57938	2.71879	1.92149	2.92678	3.78128	1.7649	3.5274	4.15154	2.55902	1.868	2.8178	2.95123	1.89509	3.93038	1.94546	4.5021	3.34812	2.94213	5.27083	4.68857	3.64756	3.77156	3.22754	4.88073	2.50895	1.81461	3.76351	2.24489	3.90575	4.0572	1.90173	1.69493	4.70975	1.90061	3.23836	3.32624	4.69984	3.32941	3.27249	3.8246
WDR63	9.90034	5.07092	7.56525	7.10051	5.48748	5.73936	4.05272	5.9985	7.12744	5.31434	4.883	4.91843	4.61578	5.94773	7.54897	3.86354	4.65956	6.23498	4.76393	6.14341	4.17231	7.42631	4.98083	5.5075	7.54586	6.16248	5.81475	6.06057	4.22047	5.44751	8.73898	3.4966	5.57792	8.37861	5.28654	6.29273	6.00993	5.12063	4.85072	4.17944	7.3834	4.98083	3.93023	9.4929	8.02821	4.95279	5.11963	5.04982	3.18633
WDR61	10.2811	10.6032	10.6668	10.4367	10.5434	10.5026	10.5926	10.6257	10.4822	10.5343	10.9233	10.2937	10.6879	10.7569	10.389	9.80917	10.4016	10.6265	10.4636	10.6265	10.5001	10.6332	10.5408	10.7542	10.7271	10.4403	10.517	10.7265	10.587	10.4784	10.3769	10.6741	10.5337	10.5821	10.3219	10.8942	10.5595	10.6165	10.5893	10.5116	10.846	10.7097	10.7201	10.5243	10.5032	10.6833	10.323	10.5616	10.5931
WDR60	9.71286	9.29845	9.56564	9.34065	9.85654	9.1941	9.11069	8.57178	8.96583	9.20881	8.73028	8.93773	9.1971	9.22695	9.48998	8.54971	9.03858	9.35742	9.10419	9.05319	9.08548	9.02012	8.85969	9.04561	9.36449	9.28026	9.30678	8.8583	8.53624	9.00106	9.67231	9.63243	9.79084	10.0545	9.31548	9.62654	9.06251	8.42535	8.87695	9.27378	9.46314	8.93317	8.17156	10.0378	9.71237	9.50744	8.90459	8.92011	8.99918
WDR59	10.178	10.3076	10.2955	10.2863	10.1006	9.65938	9.98099	9.82302	10.1895	10.0221	9.75239	10.0739	10.0405	9.88183	10.0833	9.96407	9.9699	10.0477	9.95164	10.1274	10.1684	9.55254	9.96671	9.62417	10.042	10.212	10.0293	9.9346	10.058	10.1297	10.2323	10.3551	9.84202	9.93126	10.4999	10.1276	10.2621	10.0415	10.098	10.1127	10.2979	10.0505	10.0493	9.73551	10.1979	10.1701	10.132	9.82072	10.2459
WDR54	12.523	9.58758	10.9369	9.9987	9.39655	9.3392	9.5779	9.17494	10.4984	9.68723	9.01088	9.5247	9.24061	9.29123	10.6664	9.17202	10.1425	9.78069	9.68791	9.74947	9.61495	10.0228	9.53185	9.31355	11.0889	10.1014	9.24674	9.74479	9.6646	9.46445	11.2145	9.7478	9.28754	10.7374	9.72728	9.79345	9.78432	9.72143	9.54921	9.5659	10.7138	9.52861	10.0381	12.109	10.7867	9.83028	9.7306	9.69056	9.62874
WDR53	7.38563	7.6497	7.46547	7.46914	7.65591	7.30996	7.48871	7.4781	7.6532	7.47031	7.63694	7.68391	7.3874	7.61305	7.46431	6.79359	7.36604	7.47732	7.66228	7.67734	7.74817	7.23896	7.68391	7.7181	7.46327	7.26858	7.62822	7.80432	7.60094	7.319	7.39414	7.50012	8.03601	7.48611	7.84294	7.46667	7.61721	7.7799	7.72664	7.46792	7.61527	7.78498	7.39808	7.04045	7.48247	7.51092	7.43386	7.56224	7.36165
WDR52	6.76464	4.89244	5.45709	4.90452	4.96245	4.63891	4.60143	3.99077	5.64499	4.36683	4.66825	5.05061	4.51581	4.83961	5.24138	4.77981	4.6236	4.6403	5.75641	5.1489	4.9067	3.67387	4.39998	3.85779	4.61816	5.08525	4.67756	4.91877	4.37409	4.61865	5.48378	3.94357	4.08774	5.90739	5.4516	5.1888	4.96351	4.42586	5.39972	5.10502	4.98515	5.37324	3.39555	6.32466	5.80999	4.80033	4.82316	3.25898	5.0958
WDR49	6.749	3.22646	4.20657	3.28291	3.15444	3.43668	5.75631	3.34459	3.48905	6.14182	3.20631	3.40439	4.48161	3.38678	5.85097	3.44665	3.4629	3.24473	4.27196	4.70759	3.37128	3.44483	3.09621	3.37379	4.17644	3.51287	3.17278	3.16329	3.12941	3.53453	4.92778	3.44665	4.31625	6.19508	5.58919	4.20063	3.67026	3.36732	3.31883	3.52847	4.59842	3.32057	3.50854	6.60055	5.17733	3.76021	3.31398	3.43484	3.6166
WDR47	7.72854	8.98465	7.65289	7.65946	7.68921	7.42282	7.16927	7.57381	7.36803	7.74514	7.58234	7.42034	7.6064	7.67569	7.76042	7.8671	7.39542	7.43036	7.19306	7.44525	7.37595	7.06927	7.46104	7.28191	6.99713	7.48166	7.61871	7.41271	7.25394	7.66288	7.60218	7.64431	7.65668	7.80276	7.65003	7.46189	7.54659	7.04007	7.44525	7.72726	7.46361	7.28382	6.93368	7.88139	7.69205	7.68068	7.44677	7.40318	7.64499
WDR46	8.63787	8.4568	8.16474	8.83335	8.84717	9.00518	8.57969	9.48215	8.67214	8.24471	9.15423	8.5758	8.99953	8.43974	8.47454	8.85768	8.56195	8.49881	8.39023	8.55582	8.76143	8.82498	8.82726	9.10455	8.66427	8.60612	8.60612	8.62214	8.63684	8.62155	8.52696	8.77498	8.80502	8.42569	8.49569	8.90279	8.44261	9.24466	8.74463	8.34486	8.97731	8.99649	9.09558	8.76586	8.46632	8.28317	8.56676	8.6152	8.70764
WDR45L	11.698	11.0811	11.0111	11.2249	11.2094	10.8877	10.7082	11.0776	11.005	11.1118	11.2367	11.1325	11.0921	11.1265	11.1962	11.1407	10.8104	11.3273	11.1265	10.9069	11.1887	11.32	10.9329	11.0451	11.2162	11.2376	10.9791	11.0128	11.0073	11.1202	11.4707	11.4249	11.2879	11.3912	11.1682	11.296	11.1315	10.8018	11.3942	11.1682	11.296	11.2324	10.9517	11.6399	11.2558	11.2879	11.1669	10.9381	10.964
WDR45	9.48848	9.57794	9.64405	9.51	9.49144	9.89199	9.65265	9.40326	9.62404	9.6353	9.39375	9.53978	9.61382	9.5339	9.53048	9.78211	9.8966	9.46798	9.65694	9.738	9.55624	9.57318	9.69227	9.5339	9.65761	9.84981	9.33039	9.43998	9.79903	9.46798	9.47938	9.87478	9.38643	9.23686	9.64032	9.17848	9.59362	9.48817	9.50503	9.72966	9.43252	9.41267	10.0523	9.57448	9.50503	9.50031	9.77378	9.57478	9.61601
WDR44	8.0798	8.44076	8.04129	8.42195	8.22031	8.13981	8.0431	8.31038	8.37416	8.24838	8.0158	8.09371	8.60293	7.97519	8.41628	8.47569	8.30316	7.9795	8.15348	7.98038	7.88718	8.38021	8.28778	7.99934	8.11223	7.90573	7.99934	8.23272	8.06738	8.1281	8.26588	8.5544	8.44027	8.15202	8.38314	8.24453	8.08974	8.17245	8.25586	8.15376	8.10394	8.28082	7.53018	8.05887	8.28669	8.43264	8.14939	8.32063	8.02799
WDR43	7.09921	7.91238	7.58872	7.56042	8.77994	7.63278	7.62315	9.35826	7.50754	7.8986	7.6124	7.59063	8.08065	7.90031	7.59702	8.00983	7.72074	8.02314	7.88574	8.0474	7.58714	8.44607	8.01501	8.7083	7.36081	7.62737	7.39669	8.0267	7.73209	7.72633	7.69328	8.32351	8.91477	7.91096	8.09798	8.1445	7.68492	7.61958	8.45627	7.60505	7.50222	8.06166	7.31231	8.74965	7.20759	7.736	7.57301	7.81857	7.33471
WDR41	8.77844	8.82819	8.9324	8.82699	8.95052	8.66729	9.14455	8.88884	8.68662	9.23219	9.11089	9.00266	9.30669	9.38211	8.42586	8.78262	9.13751	9.07852	9.3656	9.11922	8.91751	9.24386	9.44155	9.43111	9.45225	9.17215	9.16546	9.26104	9.21159	9.10848	9.14558	8.97782	9.21615	9.00152	8.82065	9.10795	9.28781	9.59795	9.27013	8.9296	9.08013	9.29552	9.27504	8.86397	9.10848	9.31713	8.99677	9.35085	8.90539
WDR4	7.15694	7.12847	6.38276	7.14919	8.14125	7.54896	8.06566	9.33918	7.46567	6.53966	7.81089	7.21449	8.20748	7.72479	7.1745	7.39951	8.04769	7.42748	7.57235	8.05509	7.16729	7.86625	7.60093	8.28807	7.3203	6.99615	7.44989	7.55891	7.50683	7.52243	7.32466	7.55225	8.17536	6.859	7.61648	8.21566	7.25072	8.459	8.01719	6.81667	6.95334	7.46567	8.00922	7.79438	7.48468	7.63146	7.36106	7.73644	7.80563
WDR38	11.0222	4.41843	7.95723	6.84604	5.65508	3.66496	3.61025	7.02313	7.84839	4.5445	4.5151	4.3153	4.29789	5.57879	7.44716	4.18347	4.5357	6.38656	4.24972	6.19407	3.9462	6.93381	4.32808	4.90975	8.12773	6.23608	5.10852	5.92324	4.02616	5.30504	9.09663	4.58424	3.98348	8.62004	5.26668	5.91652	5.95187	5.08475	4.75979	4.23647	7.6355	4.99492	4.45033	9.55596	7.7657	5.06082	4.82305	4.72667	3.87816
WDR37	9.74396	10.1764	10.305	10.2355	9.92947	9.94233	10.023	10.074	10.112	9.802	10.2023	9.92496	10.3307	10.1886	9.96313	9.76486	9.99265	9.98168	9.92688	9.95947	9.80139	9.9417	10.0295	9.85314	10.0882	10.117	10.0056	10.0036	10.1452	10.0807	10.2206	10.1574	10.117	9.72435	10.0271	10.0324	10.1779	10.466	10.0597	10.0838	10.108	10.2565	9.99863	9.97042	9.80993	10.1265	10.1568	9.81323	10.1508
WDR36	8.34088	8.39377	8.53726	8.52691	8.6667	8.93554	8.53484	9.61199	8.71011	8.68689	8.80199	8.46478	8.53591	8.6617	8.48309	8.07566	8.96228	8.46954	8.60033	8.72285	8.58627	8.26467	8.58487	8.76598	8.39776	8.72115	8.51696	8.33432	8.50169	8.82142	8.36556	8.87267	8.81843	8.26947	8.96304	8.85636	8.5093	8.68182	8.7156	8.8323	8.43417	8.21904	8.5502	8.52936	8.68689	8.44166	8.79521	8.5386	8.4951
WDR34	10.3742	8.73253	9.43707	8.63245	8.61987	9.17403	9.08167	8.6302	9.28028	8.78469	8.52575	8.86595	8.46172	8.73596	9.35372	8.52155	9.02973	8.44197	9.02424	8.93054	9.19735	9.30715	8.81194	8.73435	9.42257	9.40534	8.90183	9.14908	9.18758	8.72662	9.55167	8.08454	8.16637	9.03558	9.2641	8.97125	8.79133	9.13071	8.57807	8.84199	9.54395	8.57675	9.14222	10.0267	9.37294	8.39598	8.93767	8.95031	9.00414
WDR33	5.69325	8.19683	6.91714	7.34505	7.01376	6.68589	9.15167	7.25114	6.41866	7.2534	8.12719	7.19542	6.69657	6.4544	7.45133	7.5437	9.62407	7.23432	8.49785	5.50204	6.97916	8.52686	7.15388	6.82388	5.19074	5.78861	7.30525	8.6433	6.68958	8.02003	7.59181	7.10651	8.4068	7.03788	7.41758	7.0951	7.46588	5.89813	6.68958	8.64466	7.21647	7.26673	6.81042	6.48698	5.19074	10.0605	5.45736	7.52073	6.37134
WDR31	5.89112	3.92116	4.79488	3.90896	3.65373	4.27995	4.64713	3.60117	3.38528	3.81441	4.08588	4.50688	3.73837	4.38732	3.8124	2.70448	4.32655	4.43104	3.86101	4.40988	5.00368	2.75717	3.28681	4.26689	3.91171	4.33402	4.69531	3.98418	4.68083	3.48169	5.37138	4.10656	2.78244	4.74024	4.09486	4.4434	4.39985	3.2535	4.3748	4.59104	5.21606	4.26281	4.81893	5.65634	4.73763	3.04041	4.0289	3.20978	4.39066
WDR3	5.58542	6.22297	6.19599	6.19255	6.95953	6.76268	6.35473	7.96906	5.91353	6.20867	6.35411	5.98258	6.57885	6.17575	6.0746	5.75798	6.66825	6.06153	6.17955	6.70625	5.92304	6.48519	6.29839	6.78311	6.20485	5.98285	6.23035	6.09337	6.20485	6.22507	6.23144	6.55023	7.01522	5.97621	6.53879	6.36337	6.27195	6.38631	6.57993	6.239	6.03158	6.5317	6.1457	6.92772	6.18815	6.26163	6.10442	6.22408	6.09026
WDR27	8.3457	7.45862	7.3433	7.58825	7.07722	6.92265	6.87968	6.3731	7.43431	6.87968	6.58516	7.25169	6.84492	6.95867	7.55329	6.93779	7.31622	7.00797	7.21601	7.10514	7.50255	6.94371	6.99888	6.14126	7.11261	7.23717	7.20838	7.18015	6.73047	7.34588	8.23082	7.91167	6.48442	7.40392	7.38321	7.40269	7.62791	7.05833	7.46258	7.31161	7.46706	7.14165	5.96018	7.50669	7.54482	7.22609	7.11615	7.07112	7.50209
WDR26	9.53075	10.0592	10.1056	10.0416	9.95489	9.96238	9.67853	9.78554	9.72669	9.88268	9.59589	10.0073	9.75176	9.99502	9.84315	10.0634	9.80016	9.99502	9.89858	9.57165	9.6531	10.118	9.7224	9.92965	9.70593	9.65606	9.75788	10.0116	9.86844	9.8248	9.98006	10.186	10.2002	9.63707	9.99793	9.98836	9.93323	9.42846	10.0122	9.77157	9.47006	9.84182	8.38601	9.99566	9.87028	10.1246	9.72934	9.94607	9.50966
WDR25	7.48884	6.13784	6.50831	6.32297	6.67697	6.75799	6.58674	6.93517	6.86175	6.31161	7.3589	7.20569	5.59754	7.06832	6.77994	7.01088	6.53539	6.7628	6.81248	6.48813	7.34795	6.65021	6.99933	6.81963	6.41275	7.0948	7.0099	7.09381	7.07518	6.8327	6.95222	6.86381	6.59932	6.77202	6.56773	6.68153	6.67114	7.40368	6.75703	7.0516	7.29992	6.48937	7.50778	6.56717	6.77782	6.44196	7.20064	6.6309	7.37008
WDR20	8.01081	8.17263	7.77507	8.31425	8.30729	8.1389	7.74198	8.40467	8.21267	7.85886	8.3183	8.48597	8.04874	7.94215	8.07069	8.31529	7.63787	7.74296	8.46366	7.60007	8.02802	7.77876	7.8473	8.4283	7.94073	8.07232	8.33081	8.36374	7.92473	8.07579	8.04835	8.36462	8.63152	8.00802	7.89849	8.18307	7.81635	8.05802	8.28169	8.03785	8.44047	8.63615	8.06549	7.73745	7.77804	8.10134	8.00634	8.19409	8.24383
WDR19	10.3209	8.85036	8.88969	8.71882	8.28311	7.95137	7.75412	8.38156	8.57064	8.487	8.50694	8.46293	8.30496	8.15593	8.86567	8.06377	7.97469	8.69506	8.06377	7.65802	8.71196	8.41392	7.99762	7.87286	8.37509	8.4381	8.71272	8.11966	8.07333	8.58348	9.16498	8.81727	8.10543	8.95047	8.78963	8.75863	8.52764	8.02761	8.65009	8.04383	9.25175	8.01513	8.10543	9.16498	9.1346	8.4702	8.33427	8.12197	8.16665
WDR17	2.66589	2.90895	3.31106	2.63911	2.59058	2.65927	2.69542	2.61474	2.62461	2.63577	2.65208	3.79817	2.80555	2.62802	2.66402	2.63403	2.62389	3.37064	2.614	2.64677	2.60195	2.56721	2.76637	2.64446	2.68061	2.71062	2.50157	2.83676	2.67173	2.67878	2.63118	2.66502	2.59662	2.66402	3.78833	2.62101	2.70363	2.64765	2.71368	3.18235	3.15798	2.65251	2.62147	2.64291	3.13069	2.66502	3.59465	2.65051	2.62147
WDR16	11.7874	5.23681	9.56695	8.93175	6.46438	2.4016	4.07074	7.48575	8.96857	6.03319	5.5828	5.27929	3.55135	7.06416	9.37584	3.49794	4.83762	7.82526	5.46689	7.35936	2.70834	8.25257	4.53477	6.66403	9.8492	8.04465	6.66108	7.5244	3.28429	6.56052	10.4727	3.3213	5.63215	10.0465	6.64046	8.05652	7.32965	5.61094	4.94389	1.44252	9.81502	6.32844	3.79164	11.0396	9.63192	6.49947	5.85478	5.72505	2.12634
WDR13	11.6646	11.0093	11.2084	11.0063	11.2728	11.0218	10.8281	11.0437	11.313	10.9736	10.9631	10.9816	10.9482	10.8135	11.3386	11.0984	11.2739	11.0025	11.0371	11.136	11.254	10.6778	10.96	10.7375	11.1023	11.4088	11.0528	10.992	10.9621	11.2863	11.1671	10.894	10.786	11.0002	11.1781	11.1422	10.8011	10.887	11.036	11.1608	11.3602	10.5482	11.1862	11.3084	11.392	10.8745	11.1795	10.9636	11.3531
WDR12	8.11704	8.79872	8.55952	8.91322	9.02415	9.26573	8.96672	10.1265	8.9385	8.37407	9.08351	8.37779	9.38399	8.76183	8.57134	8.13455	8.72967	8.39439	8.36301	9.33208	8.28817	9.41082	8.99644	9.38369	8.54184	8.25254	8.54672	8.76123	8.61895	8.49394	8.66804	8.82197	9.25687	8.02509	8.53906	8.68802	8.5022	9.11663	8.91058	8.38332	8.71041	8.84738	8.72127	9.073	8.41731	8.47709	8.53564	8.50368	8.49843
WDR1	12.196	11.8959	11.7485	12.1834	11.9216	11.8482	11.8058	12.5233	11.9431	11.7437	12.4421	11.6295	12.1084	11.8699	12.0687	12.3789	11.5516	12.2106	11.302	11.579	12.0794	11.6579	12.1286	12.0144	11.9582	11.9652	11.8876	11.6783	11.4741	12.3605	11.9701	11.7754	12.2323	12.0973	12.0488	11.9695	11.839	12.2954	11.9695	11.6282	12.1916	12.1622	12.3142	12.2352	11.7902	11.962	11.7069	11.7324	11.904
WDHD1	5.93111	6.16752	5.92222	6.3027	5.76529	6.75917	6.61588	4.83426	5.80035	5.56977	6.02368	5.56799	6.31706	5.8105	5.67965	5.74844	5.78611	5.98685	6.06717	6.98945	5.85094	6.95453	6.34571	5.62977	5.86197	5.13537	5.81888	5.96716	5.232	5.77942	6.18192	6.04946	5.50498	6.05968	6.09476	6.16752	5.68445	6.55533	6.16568	5.6528	5.83786	6.12235	4.64043	6.37951	5.78456	5.86925	5.71668	5.66618	4.80968
WDFY4	3.41905	3.70919	5.09667	3.61969	3.93428	4.28072	6.79525	4.93969	5.20467	5.20297	6.09856	4.42527	3.30412	5.85782	3.15069	4.71732	3.45379	3.17686	4.20683	4.85882	3.83838	4.52415	5.61377	5.02487	5.35274	3.3908	4.93466	4.61546	5.87117	4.47849	3.54858	3.64211	3.20304	4.16611	3.43584	4.14857	4.48684	5.75882	6.07877	4.02669	3.60649	5.00027	3.96924	4.17829	3.80998	3.12353	4.44107	4.69248	4.62393
WDFY3	7.34999	7.87966	7.04444	6.94503	7.65653	7.69796	7.30335	7.67489	7.42206	7.14751	6.92497	7.48367	7.30449	7.16443	7.2072	7.24344	7.36215	7.74969	7.60617	6.64243	7.24051	7.58949	6.95068	7.60461	6.76077	7.44314	7.26682	7.34659	7.47397	7.6375	7.18893	7.5878	7.57292	7.11905	7.55823	7.38536	7.11435	6.5558	7.16443	7.79806	7.38847	6.92567	6.75519	7.07462	7.18517	7.24206	7.1134	7.06533	7.67143
WDFY1	9.87906	10.1621	10.045	10.0805	9.49928	10.3834	9.92236	10.015	10.118	9.89225	10.6647	9.7599	10.1759	10.0652	10.0023	10.1141	9.97217	10.3348	9.94	10.2485	10.1056	9.66395	10.1582	9.68881	9.78358	9.63022	10.0999	9.6912	9.84557	10.419	10.1554	10.2044	9.935	10.2798	9.91103	10.146	10.0302	10.4612	10.135	9.80909	9.9369	10.0564	9.42551	10.2212	10.1252	9.9369	9.92293	9.54568	9.95033
WBSCR27	9.81595	8.47795	6.05898	5.19479	6.74734	4.91363	7.57793	5.133	7.39596	6.86995	5.18839	5.49846	6.09785	6.33117	5.93055	5.71326	5.52526	7.3675	5.45448	7.48196	5.7335	6.99025	5.90513	4.87764	5.80414	6.42009	5.50985	6.7548	7.00765	5.80185	7.94256	6.6467	4.14993	6.04351	6.86648	7.43754	6.73037	4.87571	5.87305	4.90702	6.41811	6.11448	5.58059	6.74847	8.32032	6.26663	5.80071	4.63275	6.76502
WBSCR16	7.82337	7.54569	7.57377	7.64192	7.74168	7.81712	7.77765	8.14593	7.81387	7.42502	8.36348	7.60221	7.86202	7.64034	7.73767	7.80193	7.56319	7.74764	7.47337	7.87196	7.99713	7.86594	7.96232	7.64688	7.66336	8.08398	7.74059	7.51257	7.56682	8.09195	7.61056	7.92203	7.44895	7.54301	7.50462	7.64265	7.65723	8.21433	8.11139	7.7357	7.94113	7.74446	8.41476	7.59744	7.7565	7.5366	7.76753	7.63924	7.84282
WBP5	11.0675	11.6602	11.101	11.4301	11.5129	12.1632	11.2636	11.0395	11.1697	11.3406	10.9109	11.847	11.6027	11.3781	11.48	11.6481	11.1185	11.8607	11.6625	11.4053	11.0734	11.9687	11.3157	11.8379	11.1795	10.923	11.4013	11.5992	11.0953	11.1882	10.8382	11.9059	12.0163	11.7331	11.311	11.5753	11.5769	10.1604	10.8883	11.5319	11.1739	11.7302	9.99907	11.204	11.2469	11.7949	10.932	11.1227	10.2495
WBP4	9.56489	9.97268	9.96073	10.0085	10.0417	10.3487	9.99036	9.52543	9.72287	9.93866	9.60059	10.1957	10.0385	10.04	9.81712	10.436	9.9241	10.2822	10.2671	9.67442	9.71828	10.1162	9.87935	10.2811	9.66052	9.51496	9.87349	10.1841	9.62985	9.73446	9.81943	10.1778	10.544	10.0374	10.0153	9.7666	9.92754	9.66566	9.59936	9.66211	9.58474	9.99868	8.35106	9.81053	10.0496	10.0049	9.82289	9.76632	8.94258
WBP2	11.7788	11.3573	11.8343	11.4609	11.9381	11.3364	11.8152	11.9224	11.6649	11.783	12.4094	12.0844	11.6831	11.9779	11.8076	11.8735	11.5324	11.9162	11.7551	11.5424	12.1454	11.347	11.6538	11.8662	11.6684	12.2148	11.9979	11.8248	11.9594	11.8984	11.8632	11.646	11.5865	11.9206	11.4981	11.8856	11.8676	11.9404	11.8583	11.7807	11.6365	11.4368	12.144	11.6234	11.799	11.8052	12.0039	11.9045	12.0899
WBP11	10.125	10.1871	10.0674	9.82188	10.4909	9.63887	9.97908	10.5174	10.0005	10.1899	10.2129	9.99226	10.2553	10.1033	10.3315	10.4946	9.98207	10.1651	9.97284	9.90905	9.98504	9.95538	10.0241	10.1402	9.96653	10.2141	10.1308	9.93683	9.90736	10.3844	10.2217	10.0767	10.4546	10.2787	10.2302	10.3555	10.2318	9.97166	10.1417	9.94068	10.1955	9.91572	10.1646	10.39	10.0829	10.2861	10.0403	9.98902	10.1699
WBP1	10.7478	10.0481	10.4933	10.0738	9.95478	10.1043	9.90427	9.63968	10.4265	10.2453	10.0209	10.1713	10.0022	10.0441	10.223	9.89835	10.4626	9.91404	10.2435	10.4404	10.3755	10.0382	10.0616	9.6581	10.3043	10.4117	10.0825	10.1661	10.359	10.2293	10.3805	10.1534	9.69719	10.0048	9.98816	10.1092	10.1293	10.1873	10.0209	9.99632	10.3683	9.96181	10.2684	10.2139	10.2061	10.1114	10.332	10.1661	10.3177
WASF3	7.73469	8.72121	8.22426	8.68001	9.33449	9.42716	8.33569	8.34601	7.41621	8.85868	8.86884	9.52997	8.62843	8.87104	9.27449	8.49058	9.32369	8.79426	8.99986	8.08273	8.36391	8.05123	8.39097	9.17801	9.03951	9.45841	9.13866	9.2942	9.24129	9.11533	8.45417	10.293	9.17163	8.49058	9.58894	9.2942	9.21062	7.53423	7.95637	9.58674	8.61949	9.42424	7.99677	8.06931	8.46135	8.89565	8.69422	9.71336	8.87845
WASF2	10.5068	10.0503	10.3765	10.1253	9.90308	9.96325	10.2243	10.0973	10.3338	9.78845	10.701	10.0807	9.73259	10.002	10.5014	10.7711	10.3288	10.2058	9.68492	10.4606	10.4578	9.39795	10.3648	9.52752	10.3196	10.9011	10.1	9.6865	10.135	10.7283	10.3125	10.3389	9.64525	10.5177	9.98292	10.1729	10.2138	10.3854	10.0913	10.3479	10.2979	9.74667	10.7447	10.1519	10.2282	9.96355	10.5291	10.2191	10.4793
WAS	8.45736	9.04725	8.86322	9.13399	9.31739	8.51732	9.42767	9.14363	9.1857	9.04092	9.25732	9.26512	9.33036	9.2446	8.68086	9.77207	9.19375	9.12212	8.93936	8.36605	8.85824	9.04284	9.31246	9.15002	9.14033	9.06011	9.13977	8.92022	9.34706	8.54984	9.05078	8.87245	9.0446	8.92741	8.95554	8.58925	9.00694	9.98605	9.37104	9.15983	8.61185	9.10201	9.67767	8.70135	8.58374	9.64518	9.51351	9.23533	9.13977
WARS	11.9214	11.7138	12.1324	12.2354	12.3266	11.1713	13.4304	12.8429	11.8859	12.5662	12.8017	12.6264	11.8519	12.727	12.6968	13.1664	12.5315	13.4549	12.3188	12.3474	12.6805	11.2573	13.4587	12.8161	12.1638	12.8068	12.6608	12.5416	11.9955	13.7011	13.128	11.6555	12.6403	12.8771	12.3301	12.3697	12.6968	14.1055	11.9796	12.568	12.3874	12.1482	13.0349	11.81	12.5432	13.2245	13.0801	12.7162	12.5662
WAPAL	5.39586	6.24314	6.71231	6.32351	6.90132	6.32289	6.76726	6.94189	5.86952	6.63562	6.71074	6.82202	6.78458	6.83801	6.34724	6.99493	6.43737	6.61319	6.36361	6.61918	6.39014	6.52805	6.74739	7.06479	6.1502	6.29645	6.35971	6.74178	6.46924	6.37176	6.29092	6.5419	7.10681	6.59432	6.6416	6.12894	6.80916	6.8149	6.93215	6.63617	6.05027	6.84923	6.84113	6.74789	6.07912	6.63809	6.63975	6.7283	6.33844
WAC	11.9344	12.1341	12.2091	12.2186	12.2161	12.187	12.0931	12.1944	12.1457	12.047	12.002	12.3237	12.0254	12.162	12.2754	12.3375	12.2091	12.2329	12.3877	12.2312	12.0717	12.1137	12.0499	12.1527	12.1274	12.0489	12.2522	12.18	11.932	12.1438	12.2586	12.2262	12.482	12.2186	12.5078	12.0084	12.2547	11.7759	12.1115	12.1185	12.047	12.0887	11.5792	12.0594	12.1274	12.2329	12.1704	12.1757	11.9716
VWF	14.4019	14.9685	14.3702	14.4935	14.0923	14.6073	14.5769	14.4744	14.845	14.5769	13.8634	14.845	14.5471	14.167	14.3627	14.6574	14.9859	14.4538	14.4451	14.4651	14.5346	13.6171	14.3846	13.9307	14.3702	15.1217	15.02	14.6784	14.3189	14.9179	14.6073	14.9859	14.4019	14.8611	14.9685	14.6073	14.5259	13.9231	13.3094	15.2324	14.7408	14.1784	14.4834	13.6917	14.6681	15.5576	14.4019	14.4538	14.902
VWCE	6.63127	7.50563	6.51486	6.88071	6.08087	9.02487	5.62535	5.93753	7.23742	6.88429	6.54926	5.33127	8.85598	7.26973	5.83761	6.61427	7.85385	6.40131	5.84352	6.71796	5.3655	8.03394	7.25997	6.36577	8.62324	5.80178	5.14102	6.57418	6.64423	6.97558	6.62628	9.29689	6.09933	6.31487	5.64079	6.79388	6.11929	7.74773	6.76874	6.4382	6.53824	6.4358	7.78547	7.87041	6.8462	7.63657	6.08494	7.81763	6.72258
VWC2	2.07442	5.75364	4.85927	4.73129	4.90256	3.51945	4.3592	4.50645	5.11979	6.25182	5.9606	4.98489	5.85374	5.84649	4.35009	4.3707	5.70751	3.47388	4.97094	4.48856	3.02142	5.67762	6.09805	5.52132	5.26412	4.62023	3.43881	3.69144	4.26566	5.22303	4.47931	4.01288	6.92918	4.83781	3.40478	5.24791	4.10995	5.63582	3.51945	4.13604	5.82959	3.93607	5.86803	3.32869	4.99941	5.36829	5.12903	4.23517	5.8707
VWA5A	8.21267	8.21058	8.70153	8.65988	7.95194	7.85547	8.34055	8.6221	8.7276	8.36781	8.81145	7.8858	8.74357	8.51047	8.32292	7.88356	8.06046	7.38897	8.21713	7.69453	8.48514	8.60376	8.97899	8.35945	8.23741	8.51867	8.52198	8.63761	8.57768	9.23782	8.62993	7.35503	7.85152	8.05428	8.03901	8.86096	8.4644	8.8938	8.86649	8.54828	9.15828	8.70532	8.66055	8.67389	9.15243	8.05515	8.83264	8.03901	9.23364
VWA3B	8.75949	2.2564	5.76075	5.25729	2.32113	2.43348	3.10276	4.54299	5.52643	2.05392	2.43126	1.99447	3.17959	3.57209	5.78613	1.99027	4.21107	4.44933	1.99447	4.06342	2.37094	4.11443	2.08104	3.29618	5.30831	4.52923	3.012	2.7458	1.72676	3.23144	6.88508	1.98088	2.92235	6.81218	4.21669	3.65567	2.51287	3.42252	3.62431	1.96842	5.70037	3.35296	2.05961	7.73326	6.19042	3.84159	2.25983	1.96599	2.17394
VWA3A	10.0811	6.3123	7.79578	7.71391	6.4681	3.50177	4.61262	6.27478	7.79151	6.50296	6.41611	5.98797	2.36675	6.22268	7.96433	6.87808	6.43001	6.82161	6.02532	6.27335	6.64081	5.6981	4.38474	4.66869	7.69709	6.68231	6.77762	6.62832	4.30298	6.71734	8.70691	3.57531	7.28061	8.79073	6.93498	7.23885	6.4989	4.76885	6.38957	5.70442	7.97865	5.67494	5.25342	9.36095	8.67607	6.44497	5.84198	5.24311	5.93437
VWA1	6.00232	8.39082	6.31545	7.49357	7.31445	9.0391	7.55793	7.11121	7.61378	6.79031	6.13206	4.39452	9.1244	5.78781	6.22565	6.25458	8.73095	6.31681	6.03567	7.84064	7.34447	9.03308	7.08425	8.14471	7.97024	5.59942	6.51399	7.61276	7.84733	7.52987	5.84993	8.16936	7.61378	5.05059	8.97785	7.43358	6.48789	7.53085	7.99906	7.31107	7.57395	7.33067	8.19371	7.00215	7.25811	5.60129	6.23659	6.86856	7.60534
VTN	4.31107	4.9288	4.06561	6.11902	4.98184	5.84548	4.57944	4.9288	4.45744	4.97751	4.64042	4.94496	5.39631	4.48831	4.64683	5.61146	5.15788	4.64609	4.61733	4.03102	5.25722	4.98542	4.47881	4.66953	5.12702	4.69483	3.48629	4.54919	4.91551	4.06303	4.35703	5.90852	4.72399	3.77873	4.16827	4.93149	4.21295	5.25325	5.27841	4.68947	4.27032	4.47099	5.69347	4.05864	4.24576	4.88595	5.24229	5.23518	4.71681
VTI1B	10.7143	10.7915	10.8942	10.8602	10.6824	10.8689	11.0342	10.5499	10.8705	10.6945	11.1055	10.7869	10.7742	11.0533	10.7431	10.3578	10.85	10.7929	10.7461	10.9856	10.7287	10.9016	10.8674	10.7869	10.6714	10.69	10.6521	10.9741	10.8723	10.5734	10.817	10.9422	10.5375	10.5972	10.6684	10.9649	10.8231	10.7385	10.8463	10.5091	10.702	11.4255	10.5375	10.3412	10.6576	10.5705	10.8231	10.4541	10.4677
VTI1A	4.82208	5.70895	5.16622	5.33214	5.82125	5.72608	5.8584	5.62993	5.50753	5.49595	6.02283	5.69296	6.13883	5.78425	5.25015	5.93627	5.59388	5.50031	5.59027	5.3776	5.05671	6.01538	5.77988	6.10328	5.39987	5.12344	5.81518	5.65784	5.2629	5.32403	5.37472	5.73345	6.21518	5.36723	5.29659	5.6906	5.36172	5.83449	5.7157	5.45967	5.2791	5.8991	5.91227	5.91708	4.9956	5.76924	5.50031	5.87988	5.04229
VTCN1	7.7289	1.3744	5.5002	3.69181	3.35136	4.02738	1.78949	3.84422	6.80824	5.13948	1.2425	1.68701	2.4378	4.18803	6.17901	1.70038	1.87172	3.5687	3.52372	11.4049	1.79924	4.54703	1.61181	2.32812	4.03384	2.04555	4.40759	2.57617	1.53119	3.17567	6.10301	1.67237	2.80909	6.82466	1.43806	5.22602	3.40931	2.68208	2.32812	2.71235	5.78045	3.08165	1.7287	9.09006	5.28734	3.57279	1.31991	1.91592	3.7813
VTA1	8.06032	7.87397	7.52198	7.87013	7.38774	7.97363	7.67467	7.98867	7.71776	7.48191	8.07974	7.90073	7.61503	7.80053	7.517	7.68621	7.44902	7.61689	8.17819	7.45402	7.46614	8.09493	7.78323	8.00143	7.73455	6.92226	7.83769	7.80088	7.74547	7.43335	7.60012	7.85002	8.10881	7.63217	7.52277	7.56297	7.9063	8.05428	7.51731	7.40683	7.8971	8.2076	7.21627	7.77014	7.53309	7.64475	7.57124	8.21005	7.34859
VSTM2L	9.09193	6.22075	7.00951	6.04951	6.01907	7.15721	5.49201	6.57393	6.93364	6.19202	5.29624	5.27258	6.03398	5.90662	6.6115	5.55454	5.18668	5.85088	5.68545	7.19825	6.05102	7.90334	7.00985	7.20751	6.85176	5.95143	5.86283	5.63046	6.03398	6.179	7.60095	3.96963	6.39795	7.35656	4.53261	6.27287	6.38434	6.92688	5.46434	5.32852	7.28326	5.55371	5.8838	9.38378	7.47609	5.66495	5.0616	5.81001	6.27854
VSNL1	5.46278	6.44557	6.45296	6.09346	5.08067	5.99699	6.21532	5.36583	5.82356	6.91647	6.2852	6.94058	5.63055	7.19456	6.74922	5.80324	6.29295	7.81248	7.19012	8.40958	7.28059	6.57566	6.76142	6.63257	6.2876	6.49821	6.41013	6.88647	5.75555	7.23374	6.34041	4.41436	7.6875	6.22715	6.29488	7.30786	6.67703	5.33898	5.32339	6.41636	7.29887	6.34643	5.72638	6.53148	6.88743	7.2325	5.58146	6.7043	6.35351
VSIG4	10.4654	11.413	12.5357	11.5734	10.9471	11.4405	11.3913	10.2217	11.7338	11.3393	12.8227	11.0816	11.6341	12.547	11.2666	10.3285	10.79	10.9427	11.5551	10.7782	11.1108	12.3226	11.8018	11.3393	11.1521	10.8075	11.6803	12.2055	11.9521	10.3961	11.7224	10.8417	11.5375	10.8392	11.1933	11.7224	10.911	11.1038	12.795	10.6823	11.0604	11.7386	11.7784	10.273	11.8354	10.1433	12.3914	12.7833	11.7276
VSIG2	10.7736	9.65683	11.0139	10.2157	10.4192	10.1225	10.3243	10.2701	10.8856	10.2234	10.2416	10.7457	9.53913	9.96068	10.556	10.3855	10.4252	10.4894	10.8768	10.7908	11.2922	9.67597	9.53356	10.3166	9.9592	11.2577	10.7472	10.7386	10.6444	10.6651	10.7586	7.86244	10.0308	10.7303	10.7804	10.4501	10.7086	9.85248	10.4107	10.7551	10.5158	10.3249	10.6786	9.88296	10.4897	9.89734	11.0935	10.3959	11.0666
VSIG1	1.62936	2.39351	6.52748	2.94513	3.39324	6.1259	3.37042	6.11612	1.94598	3.39082	3.29719	3.65381	5.35295	4.26734	4.27622	4.53558	2.99302	4.26908	2.02231	2.9531	3.13084	7.68486	6.85079	6.52166	5.87266	4.7735	1.44447	1.95718	2.79664	3.31713	4.10781	2.79425	3.16367	1.77633	3.18835	4.36989	2.39351	5.38781	4.46574	2.78048	2.09848	3.90358	4.64709	5.87266	5.31496	4.27326	1.56769	3.81992	4.53079
VRK3	9.58915	8.72507	9.44287	9.10127	8.95286	8.96432	9.62603	8.98384	9.3449	9.00662	8.95028	9.1454	8.67986	9.08066	9.33692	8.95028	8.87302	9.04482	8.95414	9.3527	9.4731	8.83087	9.04254	8.80216	9.11912	9.24185	9.5327	8.76669	9.03058	9.04019	9.34317	8.79738	8.50772	9.51265	9.18442	8.80703	8.95414	9.61818	9.12575	9.11573	9.06111	8.65326	9.73534	9.69899	8.76268	9.05175	9.32926	8.87446	9.22687
VRK1	8.30064	8.23814	8.07994	8.00142	8.10893	7.95278	8.22297	7.59094	7.96243	8.24496	8.05493	8.09364	7.98325	8.09885	7.9155	8.0141	8.26635	8.40218	8.26988	8.08565	7.6516	8.33332	8.02095	8.1199	8.20985	7.59154	8.11406	8.31197	7.8024	7.8778	8.10064	8.47756	8.00809	8.36736	8.17353	8.23652	8.11063	8.12432	7.96613	8.04803	8.07828	8.30633	7.52516	8.38032	8.20135	8.37127	7.87263	8.13605	7.60902
VPS8	8.19366	8.45768	8.99891	9.02855	8.11964	8.50829	8.67487	8.1385	8.72128	8.51101	9.26352	8.24229	8.51549	8.59244	8.38441	8.63403	8.33637	8.53172	8.23077	8.91291	8.61885	8.48252	8.90774	7.90123	8.34935	8.5444	8.87274	8.18397	8.00282	8.56656	8.55021	8.41582	8.0845	8.49105	8.44518	8.42803	8.67549	9.22847	8.95178	8.59123	8.45141	8.47683	8.70523	7.6823	8.45914	8.21686	8.78316	8.47109	8.84806
VPS72	9.42323	9.23051	9.38234	9.17472	9.23612	9.3778	9.34897	9.29893	9.30587	9.36916	9.42274	9.49912	9.24783	9.31818	9.22906	9.13681	9.51208	9.44934	9.50617	9.55943	9.71128	8.96644	9.28374	9.37247	9.32162	9.65723	9.60253	9.4448	9.38994	9.51639	9.22116	9.4548	9.25315	9.27079	9.42323	9.29774	9.38015	9.58042	9.29301	9.61352	9.534	9.3462	9.7652	9.07192	9.39883	9.44184	9.49973	9.44003	9.65014
VPS54	6.78296	7.39437	7.12488	7.29349	7.4213	7.54338	7.16591	7.44992	7.1353	7.16102	7.52045	7.17215	7.55902	7.54171	7.15256	7.249	7.05276	7.24801	7.10542	7.24801	7.06111	7.00253	7.18873	7.42339	6.74762	6.71583	7.05802	7.29752	7.18996	7.0756	7.32226	7.56534	7.65509	7.50461	7.34052	7.28542	7.30745	7.25534	7.35783	6.98574	7.15453	7.3233	6.46821	7.06548	7.21901	7.36652	7.27795	7.05074	7.09321
VPS53	3.7411	3.56965	3.57222	3.48444	4.15026	4.07156	4.20925	4.45114	4.00602	4.3211	4.74311	4.5974	4.40769	3.98424	3.81761	4.03833	4.79306	3.90913	3.76768	3.94439	4.4713	4.08182	4.12311	4.41928	4.08713	4.96982	3.27447	3.98076	4.10277	4.42693	3.96216	4.04034	2.48142	3.8018	4.27438	4.00395	4.26911	4.77542	4.21459	4.68846	3.86442	4.20278	4.89678	3.84669	3.63702	4.45526	4.70786	3.70577	4.7645
VPS52	8.78093	8.52166	8.81866	8.48022	8.63797	8.37568	8.72657	8.67134	8.75858	8.43189	8.75682	8.88225	8.67927	8.80922	8.76604	8.65745	8.47905	8.75682	8.61098	9.02994	9.06224	8.36483	8.70141	8.57908	8.75682	8.96708	8.84039	8.67134	8.52403	8.80445	8.69692	8.73431	8.36542	8.63515	8.70589	8.6671	8.87608	8.89182	8.60299	8.89236	8.97607	8.57744	9.04125	8.45544	8.6829	8.69109	8.82036	9.14201	8.83937
VPS4B	11.032	11.1128	11.4706	11.1143	10.8836	11.0427	11.2973	11.0817	11.1947	11.2631	11.2947	11.1829	11.0073	11.3701	11.3864	10.8769	11.2175	11.3913	11.2614	11.7727	11.0941	11.0784	11.2605	10.8842	11.2825	11.0482	11.2631	11.2105	11.124	11.1334	11.2939	11.2631	11.0887	11.0937	11.4479	11.0452	11.3692	11.0862	11.2852	11.2793	11.0056	11.2666	10.4397	10.9901	11.3754	11.2825	11.1726	11.1451	11.005
VPS4A	9.58896	9.42159	9.55212	9.43177	9.8335	9.77133	9.61502	9.9749	9.52114	9.61579	9.67847	9.57451	9.54506	9.34322	9.63937	9.56883	9.91858	9.51671	9.61359	9.63709	9.81618	9.50741	9.56061	9.67258	9.59601	9.95495	9.5652	9.53495	9.60858	9.65499	9.60696	9.71241	9.66609	9.48699	9.81698	9.50578	9.60234	9.79026	9.64792	9.69839	9.72039	9.42054	9.90908	9.48699	9.44435	9.68927	9.60696	9.97052	9.80566
VPS45	9.74875	9.69203	9.87524	10.0354	9.17278	9.65184	9.60592	9.22236	9.7593	9.50719	9.68885	9.45712	9.53261	9.85003	9.74194	9.17871	9.56215	9.75768	9.56436	9.69144	9.83451	9.69023	9.97225	9.36767	9.72102	9.67399	9.77354	9.75697	9.58376	9.77532	9.87634	9.59978	9.25135	9.62281	9.62133	9.84244	9.82581	9.96773	9.8336	9.65865	9.87608	9.82345	9.24956	9.03395	9.64774	9.41251	9.85135	9.67998	9.46938
VPS41	9.52923	9.91349	10.0386	9.52804	9.62927	9.63364	10.233	9.71577	9.87496	9.57722	10.1815	9.74279	9.59167	10.0975	9.90348	9.50968	9.68216	9.564	9.78223	10.0522	9.31082	9.98646	9.44806	9.54556	9.72017	9.62526	9.75824	9.83467	9.42303	9.71604	9.82027	9.64118	9.38831	9.75992	9.34935	10.1233	9.73598	9.13561	10.0622	9.63241	9.56267	9.81969	8.81466	9.30656	10.0347	9.62996	9.81669	9.14288	9.87823
VPS39	8.37405	8.43455	8.88695	8.63592	8.3363	8.42861	8.80198	7.88062	8.82247	8.46422	8.76617	8.55913	8.46975	8.58777	8.55227	8.0375	8.39295	8.16611	8.35095	8.72658	8.7979	8.1971	8.48967	7.99974	8.52744	8.67766	8.72354	8.554	8.66832	8.67614	8.4945	8.42938	7.82243	8.34648	8.55339	8.60435	8.54077	8.85613	8.95635	8.5763	8.69949	8.17036	8.92562	8.21305	8.61925	8.37285	8.69695	8.44502	8.75291
VPS37C	11.8636	11.7065	11.6007	11.8513	11.8059	11.6224	11.8014	12.1611	11.72	12.0503	12.3648	11.9591	11.6936	12.1294	11.7254	11.9366	11.5273	11.8493	11.9355	11.8091	11.7552	11.8426	11.7473	12.3453	11.6808	11.926	11.9238	12.3528	11.9909	11.7254	11.8742	11.6573	12.1307	11.6451	11.8878	11.8848	11.7633	11.6369	11.8493	11.8059	11.7265	11.8251	11.9194	11.7125	11.5851	11.7605	12.279	12.0175	12.0679
VPS37B	10.5266	10.6452	10.2992	9.98087	11.1916	10.1716	10.0057	10.9444	10.1109	11.2702	10.1186	10.5918	10.7521	10.0105	10.5739	11.7996	10.1039	10.7422	10.3129	10.527	10.9427	10.5337	10.0352	10.8517	10.3722	10.7435	10.4192	9.92174	10.1617	10.4363	10.2689	10.2562	10.9769	11.2277	10.6972	10.6412	10.4146	10.0626	10.2773	10.2261	10.2199	9.73076	10.5054	11.6468	10.4603	10.7951	10.4561	10.202	10.2869
VPS37A	9.26848	9.43883	9.25183	9.64657	9.84263	9.65389	9.41813	10.1223	9.2145	9.38982	9.66369	9.3021	9.7975	9.5819	9.48753	10.0768	9.16575	9.57653	9.20433	9.17353	9.20171	9.88619	9.57781	9.6735	9.13011	8.99663	9.13537	9.22472	9.08556	9.1847	9.23476	9.49109	10.2542	9.61864	9.60674	9.24822	9.58159	9.15389	9.48437	9.3254	9.27775	9.67797	8.87388	9.49168	9.33444	9.73229	9.12448	9.39091	8.97758
VPS35	11.0597	10.4862	11.0291	10.7625	10.5297	10.555	10.8372	10.563	10.5015	10.6742	11.1378	10.5246	10.7258	10.9881	10.6815	10.4541	10.5297	10.9145	10.5554	11.2212	10.7958	10.3248	10.8291	10.5176	10.5917	10.6302	10.8627	10.5291	10.5206	10.7698	10.7348	10.6013	10.5646	10.9575	10.9134	10.6143	10.8141	10.9687	11.0031	10.7778	10.7694	11.0335	10.7762	11.0805	10.8657	10.7023	10.741	10.5892	10.6523
VPS33B	8.38339	8.1523	8.42088	8.35019	8.29169	8.34092	8.56568	8.34601	8.44211	8.26125	8.81333	8.11999	8.32608	8.39375	8.35571	7.81269	8.45723	8.16996	8.26676	8.45114	8.48364	8.50083	8.4694	7.95276	8.45887	8.60598	8.53164	8.1507	8.24667	8.37877	8.30248	8.17329	7.84392	7.84671	8.29547	8.37641	8.20681	8.95335	8.64503	8.3472	8.37527	7.87563	8.80912	8.11999	8.21466	8.34365	8.60392	8.22561	8.4932
VPS33A	7.23312	7.56038	7.63657	7.54379	7.48411	7.83987	8.00372	7.55766	7.55512	7.45953	8.02068	7.48411	7.76735	7.79009	7.59533	6.86881	7.53299	7.53933	7.73503	7.39666	7.14601	8.01733	7.85655	8.01357	7.82653	7.54322	7.61897	7.74041	7.56753	7.26954	7.60992	7.72415	7.66095	7.64465	7.687	7.75481	7.53553	8.22827	7.83471	7.35424	7.61939	7.8456	8.08977	7.37084	7.43366	7.65781	7.68647	7.94988	7.55948
VPS29	10.8643	11.2925	11.5449	11.0793	11.3283	11.5617	11.6958	11.2488	10.8838	11.3944	11.5862	11.625	11.4428	11.8923	11.0978	10.9789	11.4782	11.774	11.6142	11.416	11.3803	11.524	11.4319	11.8028	11.4484	11.1313	11.6126	11.8125	11.6474	11.3601	11.5093	11.1257	11.5866	11.4104	11.1911	11.3499	11.5953	11.6621	11.4061	11.4536	11.1968	11.3366	11.0613	11.2821	11.4331	11.2887	11.6411	11.6301	11.2693
VPS28	12.7075	12.3624	12.4907	12.3823	12.2706	12.7318	12.3438	12.1978	12.6513	12.5884	12.2977	12.5109	12.0935	12.4167	12.3823	12.0992	12.7493	12.8361	12.7442	12.8072	13.1041	12.1357	12.4005	12.2186	12.5408	12.6187	12.5072	12.673	12.7631	12.5839	12.5572	12.2502	11.9881	12.3049	12.4647	12.7631	12.4366	12.4203	12.2766	12.6985	12.5963	12.374	12.44	12.0741	12.8471	12.4326	12.6109	12.4907	12.6285
VPS26B	9.35493	9.4221	9.48083	9.5335	8.87007	9.31839	9.35808	8.73304	9.31627	9.02444	9.47968	9.19314	9.25902	9.35095	9.28727	8.77106	9.3491	9.22556	9.1005	9.38077	9.36219	9.11889	9.33381	8.90172	9.35643	9.48584	9.12007	9.07011	9.47414	9.29948	9.43822	9.47787	8.61102	8.90963	9.25114	9.1005	9.45417	9.64273	9.32559	9.36085	9.51784	9.05296	9.84454	8.75597	9.14025	9.3305	9.48151	9.39148	9.3694
VPS26A	11.2634	11.1787	11.1829	11.3072	11.5099	11.5406	11.2439	11.5475	11.3215	11.5598	11.5649	11.6466	11.2141	11.886	11.4418	11.3813	11.4545	11.5115	11.5646	11.4904	11.3566	11.3855	11.287	11.7737	11.3779	11.2071	11.4545	11.7564	11.4425	11.3624	11.3065	11.3792	11.811	11.3531	11.3397	11.3708	11.4787	11.0112	11.4025	11.4553	11.1333	11.4309	10.7275	11.1283	11.3404	11.5923	11.3995	11.5646	11.1244
VPS25	9.65501	9.36205	9.33193	9.31863	9.16996	9.57835	9.5193	9.26423	9.51083	9.24349	9.16852	9.28793	9.38869	9.1409	9.41764	8.71476	9.52445	9.02791	9.25995	9.27381	9.10506	9.7327	9.37508	9.29588	9.37508	9.56986	9.00288	9.40289	9.62866	9.10627	9.32291	9.0439	8.72589	9.08636	9.24095	9.19746	9.05027	9.47546	9.23121	9.09599	9.51411	9.26049	9.68936	9.20044	9.13879	9.19179	9.36051	9.21491	9.44298
VPS18	9.64514	11.4524	9.55906	9.88554	9.90653	9.87063	11.3454	9.98477	10.655	9.5674	10.4139	9.98236	10.0134	9.783	9.62516	9.86478	12.0804	9.62898	10.9591	9.84292	9.47983	9.60367	10.1445	9.66901	9.4818	9.56413	9.29346	10.7086	9.85498	10.8197	10.6303	10.1892	10.072	10.6158	10.299	9.40771	10.1504	9.76238	9.80986	10.9274	10.1212	10.4225	10.3518	9.70717	9.41847	12.054	9.52981	9.65542	10.1435
VPS16	9.94449	10.2003	10.4435	10.2718	10.2318	10.7011	10.4792	10.1839	10.3893	10.193	10.1641	10.0505	10.487	10.1872	10.1064	10.0966	10.4155	10.0732	10.1839	10.3076	10.2678	10.0823	10.3856	9.90139	10.2936	10.3335	10.1607	10.0569	10.1064	10.2455	10.2365	10.2406	9.94871	9.98674	10.3849	10.1136	10.2656	10.7352	10.4785	10.2344	10.2003	10.0315	10.6376	10.1755	10.1388	10.3044	10.4196	9.99836	10.2983
VPS13D	6.75493	6.69762	6.96996	5.36939	7.24632	7.10024	6.93745	6.83437	6.70826	6.37542	7.13081	7.22511	7.01806	7.15098	6.82308	6.29424	7.33195	6.94347	7.24718	7.14206	7.3645	6.41583	6.58938	6.91575	7.00837	7.71301	7.59663	7.24092	6.9735	7.36301	6.95258	7.32716	7.12921	6.98733	7.27314	7.18376	7.08628	7.19074	7.08217	7.31544	6.85305	6.72536	7.36378	6.43451	7.21209	7.09161	7.67696	7.45405	7.53436
VPS13C	9.70677	9.74168	10.0982	9.95381	9.27741	9.87995	9.82638	9.35879	9.67562	9.71027	9.49946	9.40558	9.87302	9.79336	9.61322	9.45105	9.9495	9.9194	9.82708	9.72804	9.52519	9.82776	9.91374	9.55653	9.81629	9.56799	9.82638	9.64738	9.32674	9.80675	9.97886	9.6509	9.41275	9.92819	9.62878	9.66854	9.80739	10.0862	9.87695	9.66854	9.59504	9.77194	8.60327	9.80935	9.85516	9.83407	9.89763	9.5059	9.55843
VPS13B	2.90734	4.51668	4.07411	4.17737	4.86591	4.79157	4.45265	4.90372	4.06647	4.51204	4.90907	5.62598	4.57922	4.84591	4.38666	4.85094	4.69514	4.41791	5.18256	4.09373	4.64792	4.5933	4.41511	5.57005	4.44778	3.79195	4.10962	4.24983	4.18953	5.10986	4.36857	4.82881	5.60434	4.69514	5.26758	3.38187	4.75929	4.85094	3.942	5.03554	4.57922	5.28821	4.00773	4.19546	4.63513	5.00082	4.2823	3.743	4.84591
VPS13A	8.27477	8.60156	8.77146	8.37101	7.82847	8.27904	8.56802	7.79126	8.20794	8.03104	7.34728	8.4155	7.99539	8.41967	8.15965	7.74408	8.28473	7.93529	8.27799	7.9348	8.08887	8.65883	8.2246	8.15594	8.22411	7.8949	8.08022	8.52627	7.97326	7.90603	8.52969	7.87736	7.88192	8.11742	8.65828	7.85161	8.62077	8.19494	8.33479	8.22285	7.84791	8.33394	6.48294	8.07045	8.14978	7.82558	8.47963	7.96305	7.98027
VPS11	8.45165	8.28079	8.7359	8.31777	8.18945	8.59378	8.66983	8.19856	8.47047	8.27557	8.86716	8.42478	8.22216	8.53035	8.26921	7.97294	8.52973	8.48758	8.44497	8.63146	8.85122	7.9117	8.33601	7.97744	8.56178	8.72071	8.69815	8.4272	8.36009	8.88011	8.47385	8.50516	7.79216	8.31777	8.46041	8.30601	8.6192	8.90773	8.53896	8.55219	8.69467	8.32745	9.06222	8.12377	8.54717	8.51373	8.74423	8.70453	8.81927
VPRBP	5.63819	6.02972	5.59102	5.7564	6.58114	5.91945	6.09655	6.75997	6.01118	5.78907	5.84609	6.10552	5.90383	5.70747	5.98301	5.6502	5.49491	5.58069	5.7633	5.95583	6.06183	5.62012	5.49022	6.5098	5.88453	5.89149	6.1738	5.92689	5.43359	5.91691	6.01443	5.85848	6.45098	5.93052	6.46915	6.61014	5.63323	5.65826	5.64752	6.12858	6.24979	5.72287	5.70143	6.14106	5.54032	5.49215	5.90799	5.88025	5.9681
VOPP1	8.79883	8.75177	8.80645	9.01057	8.55445	8.78981	9.11688	8.43698	8.64381	8.65561	9.41659	8.4793	9.30599	8.92446	8.75452	9.13312	9.03449	8.6917	8.43698	9.1533	8.72823	9.00612	9.34887	8.61424	9.33469	8.64951	8.87739	8.71733	8.74003	9.51082	8.82716	9.11831	8.63887	9.04433	8.73833	8.94417	8.91781	10.1814	9.74963	8.63017	9.25059	9.55063	9.8078	9.6898	9.00691	8.93367	9.23385	9.19652	8.79404
VNN3	8.1796	5.37699	3.55037	6.03943	4.10034	3.34469	3.75796	5.02344	6.17249	4.142	3.04046	6.40597	5.05403	4.38453	5.49825	5.79926	3.44028	5.62492	3.24618	2.96366	3.44306	4.60679	3.15828	3.40855	4.24844	3.75235	4.74486	3.46953	4.88702	3.42399	6.03032	3.4442	3.09293	7.62497	3.36351	3.16975	4.38125	3.40606	5.4579	5.80862	4.71264	5.13445	3.55872	7.65598	3.8179	6.42019	3.49286	4.25344	3.61948
VNN2	9.54624	9.90356	9.18082	10.2498	9.82225	8.55488	9.63818	10.7455	10.0181	10.0527	9.18082	11.7001	10.2998	9.89076	10.2189	11.3767	8.87375	10.3561	9.35493	8.22074	9.67089	9.0439	8.91225	8.82078	9.36566	9.76014	10.0809	8.59801	10.2483	8.27363	9.89797	9.3331	8.49752	10.7982	9.15516	8.65304	9.79006	9.47438	10.8514	10.854	8.86091	9.76227	8.96631	10.2114	8.41833	11.5361	9.46027	9.47144	8.81782
VN1R5	2.76553	2.64687	2.70047	2.70827	2.83545	2.72753	2.75519	3.20459	3.18436	2.72075	2.7323	5.60515	2.77188	2.6957	2.69946	2.71416	2.71647	2.72075	4.02277	2.69617	2.64239	2.64783	2.53286	2.67786	2.7255	2.80931	2.58791	2.6334	3.52419	2.83411	2.72458	2.74384	2.66149	2.75962	2.83124	3.31219	4.10087	2.70374	2.83545	2.80618	2.66727	2.722	2.72346	2.75633	2.79374	2.75519	2.73902	2.69345	2.7323
VN1R2	3.3149	3.3149	3.25646	3.28612	3.23874	3.29379	3.30597	3.26767	3.30223	3.35333	3.27265	3.32911	3.26727	3.3349	3.3149	3.29838	3.22905	3.31288	3.21157	3.21157	3.4193	3.27336	3.26436	3.32866	3.28737	3.3018	3.22987	3.22269	3.29525	3.20276	3.32716	3.30495	3.2352	3.25646	3.29221	3.28944	3.29986	3.32382	3.22818	3.29221	3.36423	3.32716	3.19205	3.19705	3.21649	3.27221	3.29986	3.23799	3.31221
VMO1	9.17276	8.07795	9.11136	7.84355	7.96502	7.62564	7.17936	7.48559	8.55289	8.74004	9.19041	7.74358	8.70265	8.90287	8.50886	8.04302	6.57488	7.67762	7.80335	7.94145	7.87598	8.08659	7.30588	7.82547	6.99513	7.51199	7.43952	8.49596	8.95361	6.47708	9.11494	7.66757	8.67166	8.73022	7.60631	7.93762	7.35576	7.20583	8.72331	7.41251	7.41807	8.05187	8.38924	9.67442	7.54133	7.38827	9.00533	8.15654	8.54816
VLDLR	9.04083	10.1983	9.70658	9.37422	8.70541	10.2642	8.93593	8.81892	9.61916	9.34647	8.97085	8.41597	8.74385	9.00323	9.38644	9.13843	9.3235	8.92205	9.18693	9.10641	9.57515	8.85713	9.17586	8.42713	9.49496	8.82891	9.31547	8.45772	9.33599	9.56372	9.48229	9.78865	8.93645	8.92642	8.74162	9.92468	9.0413	8.78399	8.66938	8.93367	9.63525	9.07201	9.34118	8.55044	9.11139	9.39756	8.77771	9.14999	9.4286
VKORC1L1	8.99372	9.10094	9.45117	8.97154	9.29454	9.51336	9.74189	9.3036	9.37735	8.83591	9.95319	9.13872	9.49117	9.34788	9.22696	9.00637	8.9191	8.9801	9.15895	9.07756	9.16774	9.5831	9.3118	9.41931	8.92367	9.34699	9.41071	9.30505	9.39728	9.01694	8.90648	9.22886	8.95479	8.95917	9.28593	9.05912	8.9612	9.51216	9.35159	8.97208	9.42755	9.31547	9.66972	9.10616	9.03036	8.69197	9.26522	9.23196	9.54372
VKORC1	12.1201	12.3055	12.0571	12.3894	11.7948	12.7492	12.0593	11.7978	12.2783	12.1773	12.3472	12.1237	12.787	12.1308	12.1118	11.86	12.4944	11.7593	12.2574	12.0851	12.2897	12.4175	12.176	12.1802	12.5379	12.2287	11.9491	12.3695	12.5851	12.27	11.7948	12.3785	11.5954	11.8534	12.1201	12.2471	11.9796	12.3082	12.5505	12.3778	12.2525	12.0743	12.5987	12.0979	12.2514	12.0694	12.2093	12.382	12.4694
VIT	7.27835	5.25654	5.06836	4.05332	4.79248	4.94793	4.31253	4.48118	4.48218	4.41215	2.22429	4.88883	3.58077	4.28592	4.87887	3.75572	3.8432	3.74515	5.25154	3.43302	4.76533	2.9735	5.75843	2.67434	6.34906	3.77506	4.47289	3.22117	4.40259	4.61251	3.58518	10.8827	1.40485	4.91835	5.38845	4.48118	4.29524	0.748172	5.56991	6.42794	4.94128	2.84983	4.14894	5.77852	4.46698	3.84701	6.31802	6.87076	1.86845
VIPR2	3.99542	4.96632	3.3243	3.92512	4.10248	2.28849	3.93217	3.60526	5.04232	4.04905	4.60074	4.14093	4.41798	3.58237	4.19304	3.33751	4.41595	2.63597	3.6633	2.62419	2.21816	2.82414	4.05353	3.97805	4.94758	4.96082	2.45308	3.59614	4.37897	3.28496	2.3077	7.63013	3.21156	2.10331	3.65573	3.00661	3.07849	4.17778	3.62335	3.90445	2.71846	2.20329	5.11026	3.17292	2.44893	3.74039	2.17198	4.86472	2.56349
VIPR1	12.786	9.63154	10.5862	9.80842	11.206	6.40745	11.2195	11.4029	11.0511	10.3058	11.4579	12.8665	8.3491	12.0643	12.1474	11.6102	11.1942	12.2349	11.9834	11.2678	12.1605	9.53072	10.9205	10.0697	9.08376	12.2281	11.9955	11.0884	11.7274	12.5411	11.1226	8.89098	10.8189	12.9971	9.6573	10.1524	12.3101	7.62937	9.09395	12.6988	10.4196	11.0124	10.365	7.23022	10.5382	11.2032	12.4705	11.502	11.7876
VIP	6.77602	6.01764	6.77353	6.1744	5.60925	3.59067	6.25724	5.9872	6.23025	6.26862	3.8298	6.51436	4.28474	6.15494	5.82768	5.9301	5.41117	6.40405	6.83033	5.6756	6.43762	5.27924	5.70165	5.01831	5.36012	5.98611	6.57479	5.30442	5.55317	6.13266	6.79472	6.4996	7.28291	7.02257	8.2151	6.54989	6.3297	4.81927	4.72026	6.56978	6.06491	6.07944	3.47207	4.63132	6.31653	7.17457	6.32702	6.26274	5.4062
VIM	15.1398	15.6107	15.6107	15.763	15.5497	15.9607	15.6107	15.5497	15.6599	15.5497	15.9607	15.2534	15.8937	15.763	15.6107	15.5497	15.4555	15.6107	15.6107	15.321	15.6599	14.8605	15.6107	15.355	15.1663	15.1398	15.763	15.4999	15.2254	15.763	15.6599	15.8185	15.5497	15.4999	15.7193	15.7193	15.4555	15.763	15.9607	15.4999	15.6107	15.5497	15.6107	15.6599	16.2505	15.4191	15.321	15.2254	15.7193
VILL	7.64739	7.11065	7.15316	7.09966	6.66903	7.12032	7.16485	6.36254	7.30859	6.95653	6.5323	6.95276	6.96308	6.83884	6.94596	6.59829	7.11246	6.73203	7.05579	7.45211	7.18599	6.98645	7.11126	6.40357	7.13339	7.17112	6.79072	6.91855	7.20015	6.93301	7.78337	7.01491	5.98948	6.91115	6.93553	7.31743	6.98255	7.65364	7.21701	6.92995	7.23645	7.01993	7.45076	7.63216	7.07586	6.60273	7.15316	6.66344	7.00449
VGLL4	9.10691	9.52328	8.84779	9.12096	8.80729	9.43352	9.36155	8.44675	9.40179	9.01953	8.99582	9.43123	9.09229	8.88701	9.04723	9.50744	8.78942	8.75126	9.17088	8.88894	9.17276	8.91634	8.58621	8.42585	8.43415	9.15592	9.55277	8.96885	8.96455	9.2837	8.94364	9.12758	8.7642	8.7949	9.67185	8.75867	8.90932	8.70479	8.61049	9.40773	9.21851	8.26512	9.49634	9.02141	9.1311	9.13311	8.77891	9.06157	9.37756
VGLL3	10.0975	10.9132	9.93391	10.1516	10.5591	9.80816	10.0281	10.4208	10.866	11.027	10.4568	10.7981	9.37695	10.492	10.774	10.5512	10.8803	10.4408	10.8699	10.2634	11.3301	8.84359	10.0729	10.9586	10.4214	10.8195	10.6965	10.7989	10.6008	10.9463	11.104	10.9861	10.7393	10.3628	10.7533	10.8051	10.2979	9.08741	9.02928	10.9056	9.77425	10.1032	9.17593	8.81056	10.8678	10.3832	10.3803	10.6053	10.4049
VGLL2	2.45207	3.03983	2.52641	2.89214	2.42534	2.42587	2.96841	2.4452	2.47334	2.45007	2.40835	2.41554	2.44345	2.41915	2.43231	2.45388	2.45007	2.39489	3.04567	2.41112	5.5992	2.45251	5.45915	2.44757	2.4327	2.43481	2.64238	3.00059	2.99863	2.47593	2.49872	2.4468	2.75787	2.46928	2.94592	2.43988	2.44169	2.43686	2.48551	2.47831	2.60833	2.46003	2.48199	2.45726	2.45615	2.42906	2.38786	2.38145	2.47255
VGLL1	5.61045	6.22195	5.09624	4.36665	5.5134	6.6017	5.19758	5.95	5.46069	5.58398	5.98168	5.7942	4.57245	5.79301	5.85411	6.33751	6.07989	5.81336	6.54043	8.07158	7.44532	5.72374	5.36395	6.08427	5.76259	7.55072	6.83049	6.39777	6.25646	6.62607	5.84317	2.63354	5.64272	5.02791	5.95712	5.69215	5.59358	6.41899	4.31659	6.36768	6.8573	6.51756	5.25025	5.49523	5.75822	5.43501	6.5162	6.20366	6.64233
VEZT	10.2493	10.3464	10.5355	10.3271	10.0992	10.5387	10.165	10.0307	10.3542	10.2154	10.0317	10.2774	10.2103	10.2363	10.498	10.447	10.2598	10.5399	10.2745	10.2549	10.2824	10.4687	10.307	10.4054	10.1157	10.039	10.5657	10.2624	10.0032	10.3379	10.2194	10.1009	10.5065	10.4905	10.4587	10.4625	10.3244	10.0799	9.99612	10.2258	10.2144	10.3739	9.129	10.6303	10.3994	10.135	10.0968	10.0441	10.1669
VEZF1	12.1498	11.1653	11.9081	11.5504	11.89	11.5683	11.5451	11.6511	11.7338	11.9107	11.6033	12.1163	11.1366	11.7915	12.0025	11.4981	11.9589	11.9766	12.0679	11.6377	12.0037	11.1885	11.5653	11.7603	11.8109	12.033	12.0577	11.8935	11.8795	11.858	11.9216	11.6344	12.2338	11.8287	12.3805	11.5813	11.9953	11.1535	11.2699	11.9622	12.0413	11.637	11.1885	11.667	11.965	11.8008	11.7612	11.9691	11.9656
VEPH1	8.05213	7.49631	9.42635	8.0897	8.3581	7.76444	9.16447	7.71982	9.14793	7.58593	8.61244	8.00973	8.21281	9.11514	8.7467	7.417	7.42735	7.93449	8.50406	8.43606	9.57189	8.38729	8.51261	7.03426	7.42374	8.35839	9.24934	8.11807	7.9833	8.35444	8.88404	1.87706	7.33954	8.13217	7.99058	8.63677	8.04014	7.82965	9.11384	8.02786	7.98387	8.5387	8.40325	6.7378	8.71102	7.51946	8.59393	7.02304	8.14429
VENTXP1	3.1088	3.08467	2.99766	3.09225	3.02318	3.08786	3.10162	3.02011	3.12638	3.11083	3.0754	4.83523	3.05124	3.13086	3.58958	3.13339	3.04922	3.09345	3.0648	3.00677	3.15689	3.12144	3.23462	3.13435	3.09642	3.03273	3.21629	3.05571	3.11977	3.01254	3.14735	3.09151	3.05394	3.04922	3.12072	3.06405	3.13182	3.15689	3.04647	3.1042	3.13594	3.14217	3.0426	3.00506	3.03551	3.03869	3.08628	3.01335	3.03231
VENTX	5.77422	6.87277	5.6487	6.74701	6.45761	7.19869	6.05709	7.25898	6.10404	7.04496	6.10834	6.94033	6.49627	6.2467	5.91204	6.58364	5.583	5.50826	6.06831	5.14614	6.0581	7.25387	5.79148	7.78158	6.99806	6.11851	6.84015	6.38963	7.16741	5.7234	6.1444	7.51516	6.76954	6.06123	6.62725	6.01923	6.23519	5.17719	6.165	6.74075	6.39509	6.59538	6.87343	6.60323	5.85985	6.89167	7.03606	6.99484	6.62119
VEGFC	9.5881	10.5544	9.35278	10.2143	10.463	8.02205	9.88257	10.1431	10.3463	10.3739	9.52639	10.4667	9.81789	9.93473	10.5237	10.4394	9.91825	10.3238	9.83721	9.46237	10.7102	9.01124	9.42577	9.90557	9.19614	10.0081	10.2558	9.54039	10.0998	9.94405	9.83721	10.8064	9.8665	10.2516	9.46546	9.83688	9.73193	8.35509	8.41944	10.6146	9.14237	9.85625	9.50691	9.14762	10.0095	10.7013	9.89347	9.76277	9.98457
VEGFB	13.0065	13.2025	13.2474	13.1848	12.7881	13.5794	12.9259	12.8705	13.2937	12.9431	13.4863	13.2725	13.3113	13.4513	12.9355	12.8042	13.4832	13.0109	13.5108	13.3361	13.3437	13.2994	13.1763	12.9558	13.4795	13.4017	13.2261	13.6601	13.7889	13.1105	12.9536	13.738	12.9355	12.8065	12.9234	13.2117	13.1733	13.3022	13.179	13.1615	13.2353	13.3978	13.4724	12.5047	12.9508	12.9536	13.3752	13.4931	13.573
VEGFA	9.35588	10.0035	10.1445	10.0344	10.3204	10.0201	10.4379	9.82082	10.8059	10.514	9.95602	10.2282	9.32712	10.0065	10.8815	11.1352	9.97703	10.0403	10.9105	9.96689	11.3508	9.31338	9.00973	9.82153	9.44874	10.8328	11.1295	10.2404	9.75962	10.7307	11.166	8.79418	10.079	10.1498	11.3035	10.3299	10.171	8.78169	10.1063	10.6973	10.3358	9.24127	10.1678	10.0135	10.2865	10.0569	9.88198	9.42266	10.5831
VDR	6.91266	8.06687	8.27766	8.20949	8.4326	9.02273	8.11039	9.38042	8.13931	8.29443	8.31865	7.50875	8.50817	8.24355	7.67636	8.12592	7.61212	7.59247	7.73472	8.10842	7.40644	8.99221	8.44375	8.93933	7.82765	7.63566	8.05319	7.57585	7.84742	7.35007	7.7627	6.89704	8.64524	7.25327	7.39541	8.18381	7.39381	8.53676	8.61583	7.13424	7.60668	8.25973	8.33079	8.71396	7.91398	7.35272	7.85303	7.98151	7.61212
VDAC3	12.073	11.7121	11.9787	11.7903	11.3634	11.5556	11.9069	11.5267	11.7741	11.6522	11.9452	11.5296	11.579	11.8566	11.7857	11.4961	11.5864	11.7983	11.3619	11.8077	11.7611	11.438	11.8403	11.5768	11.755	11.6699	11.8433	11.6981	11.6451	11.8566	11.8114	11.6451	11.5175	11.9882	11.8556	11.6564	11.8473	11.96	11.8185	11.7306	12.0332	11.8466	11.7865	11.894	11.9211	11.8147	11.7005	11.6403	11.7448
VDAC2	7.44903	7.63985	7.58903	7.47869	7.97636	7.83669	7.87123	7.78441	7.43463	7.96786	8.094	8.09043	7.41808	7.86359	7.60547	7.70744	8.09559	7.80769	7.95388	8.2447	7.86692	7.41808	7.24553	7.93605	7.82094	7.90735	8.00104	8.09924	7.90735	7.88385	7.70887	7.88718	8.05514	7.93227	7.86853	7.94713	7.67676	7.88385	7.75929	7.95049	7.59252	7.93897	7.87762	7.9284	7.87928	7.89971	7.99335	8.09197	8.00464
VDAC1	9.68484	9.44921	9.48331	10.1743	9.90894	9.84166	9.69656	10.605	9.6136	9.72461	10.5667	9.39937	10.0473	9.73366	9.68603	10.2708	9.48769	9.56237	9.4454	9.35141	9.54377	9.92713	10.0824	10.301	9.34617	9.80172	9.96408	9.88081	9.38268	9.6523	9.48626	9.48331	10.294	9.81836	9.59025	9.86831	9.43149	10.2589	10.1076	9.49019	9.88308	10.2947	10.1857	10.0289	9.57189	9.52773	9.72936	9.65971	9.88393
VCX2	4.09574	5.4956	5.63572	4.63305	4.6292	5.414	5.73631	4.48815	5.95364	4.94255	3.90742	5.15896	4.15157	4.675	4.79295	3.6128	4.77933	5.21782	5.61198	7.14192	4.74604	5.66274	4.94378	4.612	4.45741	4.3756	5.98895	5.86112	5.29124	5.52625	5.3091	5.38523	5.6602	5.35032	4.37447	5.67534	5.41989	3.75353	5.75639	5.39834	4.50176	5.08426	5.3607	4.68179	4.44523	5.46894	3.73278	5.7064	5.35673
VCP	12.3421	11.9726	12.0758	12.0806	12.0166	12.3035	12.1936	12.1936	12.1208	12.0384	12.2458	11.9482	12.1366	12.0196	12.2257	12.0806	12.0384	11.9525	11.9922	12.034	12.1865	12.2634	12.3632	12.1018	12.1259	12.0615	12.1772	12.1422	12.1662	12.3219	12.2458	11.6889	11.86	11.9832	11.787	11.9832	12.053	12.5057	12.1208	12.1124	12.2521	12.1993	12.3708	12.2339	12.0115	12.034	12.1469	12.0968	12.2744
VCL	12.6369	12.5836	12.2751	12.3149	12.6273	12.3808	12.0747	12.9624	12.1851	12.5733	12.4052	12.1765	12.206	11.8592	12.8372	13.1776	12.4392	12.822	11.8263	12.127	12.7706	11.4477	12.3898	12.2049	12.2652	12.7917	12.5059	12.2344	11.7707	13.1961	11.7373	12.4773	13.3491	12.9368	13.3788	12.0843	12.4383	11.5266	11.7311	12.706	12.1562	12.0075	11.8837	12.5059	12.5136	12.6605	11.9988	11.8872	12.4632
VCAN	9.66603	11.3743	10.3582	12.155	10.7312	11.8249	9.86569	12.2679	10.7124	11.0623	9.75273	10.9278	12.4512	10.4091	11.0021	10.9624	9.94425	10.5029	9.776	9.90593	9.81508	11.3554	11.6881	11.7369	10.492	9.94103	10.4887	9.77187	10.293	10.3365	10.1804	11.4326	11.7292	10.4413	10.6653	11.5281	9.67505	10.0714	11.3958	11.2018	10.578	10.8574	10.0282	11.5194	10.8204	11.0632	9.55408	10.0584	10.075
VCAM1	8.63006	10.18	8.60812	11.8163	8.64608	9.67478	10.1076	11.5523	9.51994	10.6661	8.79265	10.3157	11.2742	8.85159	9.71373	12.2351	10.5438	9.06426	9.51245	8.70586	8.63685	10.046	10.9694	12.0856	11.0506	8.10301	9.56432	9.38276	9.84689	10.5555	9.98157	12.8519	10.4062	9.75819	9.04109	10.2612	10.2143	11.1306	9.84398	9.57577	10.1006	11.0757	10.2827	9.49054	10.1399	10.7994	9.34639	11.1055	9.57729
VBP1	9.33733	9.34709	9.20259	9.25412	9.56107	9.5305	9.63676	9.7225	9.19328	9.34082	9.88713	9.61701	9.44247	9.63947	9.38154	9.86949	9.29186	9.86326	9.75286	9.29256	9.45008	9.62288	9.58967	9.7988	9.33056	9.26728	9.76779	9.6101	9.51796	9.33663	9.23357	9.33361	9.844	9.79327	9.40321	9.72688	9.80584	9.5872	9.31271	9.55864	9.53015	9.87231	8.91926	9.33221	9.34082	9.4082	9.36773	9.58561	9.19814
VAV3	8.89208	7.46657	8.06745	7.55178	7.66141	7.65645	8.05734	7.51647	8.04939	7.68371	7.73181	8.42027	7.27306	8.28591	8.19822	8.20329	7.99579	8.89928	8.6638	9.74703	8.1146	8.5715	8.07126	7.76054	7.84191	8.31215	7.97129	8.43369	8.19178	8.54503	8.78053	7.09973	7.22843	8.21116	7.73181	7.58976	8.26739	8.20264	7.98221	8.59817	7.74783	8.02539	7.22066	8.55303	7.77183	7.7815	8.34829	8.06864	7.9213
VAV2	8.09515	8.59391	8.46408	8.53769	9.26426	9.17001	8.67256	8.27716	8.80858	9.10998	8.78014	9.36784	8.77063	9.08012	8.83005	8.97641	9.17034	9.28085	9.52887	8.73712	8.99089	8.58719	8.79411	8.98184	8.87995	9.59343	8.82599	9.27072	9.48398	9.36109	8.63178	8.54784	9.25128	8.47196	8.66105	8.71032	8.859	8.23976	8.36921	9.55342	8.70621	9.27373	8.94619	8.58893	8.69396	9.27072	8.74603	9.19482	9.35747
VAV1	8.52447	8.71416	9.06481	9.1352	7.89314	8.23501	9.18911	8.79193	9.31964	8.54241	9.32466	8.95986	8.93508	9.33597	8.67932	8.78548	8.95829	8.75556	8.48522	9.27291	8.59568	9.1104	9.39117	8.70718	9.19317	8.78785	8.94791	8.94726	9.31515	8.91398	8.90851	8.53095	8.10759	8.61765	8.35805	8.56172	8.97582	10.0494	9.41254	8.7996	8.85433	9.07949	9.79927	9.00637	8.7558	9.02902	9.32008	9.14506	8.86476
VAT1L	6.25541	6.12032	2.68938	6.31125	3.50224	6.95832	1.91317	4.27174	4.24793	3.34727	6.38183	3.33193	7.73642	2.02691	5.52648	5.12522	5.23789	3.08886	2.15601	3.04405	3.38255	4.47377	4.22929	5.0755	5.42525	3.17794	2.24202	3.96469	2.15943	4.26481	2.25758	7.98745	5.4932	2.54631	4.42401	5.3548	2.65689	5.56415	5.46481	2.61388	5.90981	4.04534	7.15439	5.47297	5.00519	1.92246	1.97809	5.75033	5.94171
VAT1	9.12103	8.68523	9.04282	9.44725	9.19021	9.34865	9.13715	8.68439	9.41632	8.81543	10.3251	9.38383	8.82711	9.7297	8.90517	9.58252	9.46208	9.66252	9.52651	8.76356	9.64259	9.2064	9.34936	8.97336	9.24082	9.44062	9.16301	9.6637	9.33298	9.3314	9.16929	9.72443	9.11318	8.52964	9.04756	9.07016	9.14979	9.55706	9.66858	9.63491	9.33511	9.34732	9.92803	8.22848	8.61021	9.14221	9.62874	9.68072	9.52222
VASP	8.88235	9.87177	9.95427	10.3388	10.1951	10.091	10.1006	9.90159	9.92589	9.9438	10.4733	9.31505	10.1754	10.2243	9.6663	10.2562	9.59602	9.95297	9.6712	9.30849	9.41051	9.30926	10.0302	10.3424	9.59283	9.29237	9.66778	9.80418	9.4209	9.80833	9.55004	9.34234	10.1365	9.65496	9.7585	9.78633	9.5184	9.55392	10.0449	9.20582	9.33974	9.92625	10.1345	9.7486	9.81537	9.58726	9.9438	9.65131	10.1011
VASN	11.0496	11.9353	11.3719	11.6634	11.6916	12.1587	11.4356	11.648	11.6466	12.5204	11.2496	11.6607	11.7956	11.6221	11.3588	12.1765	11.9807	11.4647	11.6428	11.4709	11.5884	12.1625	11.1358	12.3017	11.5624	12.0127	11.6316	11.7846	12.2001	12.5699	11.0144	12.2397	12.3721	11.3051	11.8457	11.7525	11.8876	10.942	11.4538	11.9917	11.5674	11.587	11.8231	12.2706	11.4961	12.1492	11.335	12.0444	12.2268
VASH2	5.67878	6.47043	5.84888	6.72112	6.09424	7.68889	6.55998	6.03794	5.86011	6.21365	5.37039	5.08437	6.58356	5.49955	6.08516	6.77589	6.93307	6.63181	6.13045	5.39123	6.14004	6.50465	6.19412	5.53841	7.03283	5.98371	5.52767	6.00023	5.99987	6.27679	6.00023	6.28473	6.50056	5.11084	7.15797	5.59892	5.80191	6.33978	6.16207	6.34874	6.24632	6.30922	6.14711	5.4323	5.91004	5.894	5.96143	6.06053	6.23114
VASH1	10.4503	10.7681	10.794	11.2874	9.68292	11.2723	10.8177	9.95374	11.0473	10.0577	11.227	10.4614	10.5135	11.2991	10.3094	10.557	11.0506	10.8683	10.8314	10.1378	10.6912	10.2036	11.0771	10.2443	10.7351	10.6945	10.4855	11.5498	11.0625	10.7623	10.8246	10.49	10.2077	10.14	11.5895	10.2211	10.5612	11.8554	9.74326	11.0046	10.8372	10.731	10.9949	9.28922	10.3967	10.6736	10.8192	10.4662	11.0062
VARS2	10.5964	10.4195	10.3971	10.3085	9.79445	10.3327	10.303	10.4535	10.1836	9.51787	10.1137	10.0862	10.1137	9.69334	10.2387	9.43534	10.1119	9.56686	9.83658	10.5043	9.91378	10.4104	9.75952	9.64334	10.1669	10.3559	10.2355	10.3124	10.4721	10.0059	10.6196	10.2161	9.91126	9.95285	10.1951	10.0419	10.1919	10.9846	10.3851	10.4473	10.2525	9.67213	10.4796	10.0512	9.77318	9.3807	10.5074	10.1326	10.201
VAPB	6.75684	6.87377	7.08765	6.75231	7.36658	7.28176	7.18033	7.13896	6.81585	6.98344	6.96914	6.83531	7.31985	6.89985	7.06883	6.8993	6.72696	6.95966	6.77155	7.44615	7.00545	6.8448	7.07571	7.25441	7.1657	7.06737	6.97898	6.76731	6.92175	6.90101	6.81915	6.95227	7.28944	6.82958	7.0781	7.04794	6.86314	7.28973	7.0917	6.76644	7.27376	6.7398	7.20088	7.00373	7.06765	7.06737	7.34718	7.11107	6.99549
VAPA	9.33508	9.0426	9.28514	9.55537	9.89043	9.59858	9.23219	9.70015	9.05921	9.4524	9.37771	9.12853	9.69907	9.08942	9.3663	10.0151	9.28432	9.21033	9.56059	8.97019	8.84253	9.47639	9.10072	9.50247	9.05584	9.1415	8.99163	9.15526	9.08071	9.03351	9.15768	9.30858	10.0889	9.47353	9.53126	9.2615	9.26936	8.93081	9.4975	9.07882	9.02561	9.58192	8.96666	9.77587	9.3663	9.41674	8.9834	9.4038	9.27195
VAMP8	13.7094	13.0991	13.9076	13.57	13.3218	13.6064	13.929	13.2314	13.6379	13.3651	13.8028	13.6666	13.3593	13.9499	13.5042	12.8689	13.432	13.5629	13.838	13.6379	13.7495	13.6825	13.8102	13.6218	13.4716	13.7274	13.7432	13.7749	13.7357	13.3651	13.9593	11.9733	13.2662	13.6064	13.4386	13.4858	13.3728	14.0188	13.6582	13.3851	13.7576	13.838	13.7094	13.3538	13.6582	12.9808	13.9499	13.7432	13.7836
VAMP7	10.8167	11.1697	10.9169	11.092	10.6664	10.922	10.7409	10.9889	10.9433	10.785	11.205	10.5807	11.0284	10.8978	10.9495	11.0858	10.5541	11.0521	10.6057	10.7065	10.529	11.1193	11.1693	10.8305	10.6512	10.4137	10.891	10.6707	10.5343	10.8656	10.7321	11.1588	10.7807	10.9715	10.7432	11.0342	10.8295	10.7608	11.0593	10.7495	10.7129	11.0705	10.1162	10.7791	10.9486	10.8914	10.6402	10.7517	10.3774
VAMP5	11.768	11.5168	11.2859	11.1886	11.4717	11.5992	12.3571	11.6918	11.4374	11.6612	11.1058	12.39	11.3616	11.6279	11.7352	11.7015	12.31	11.9054	11.9054	11.2882	12.3629	11.4821	12.3251	11.3341	11.7985	12.0407	11.9119	11.509	11.7817	12.2805	11.9242	11.9043	11.3798	11.9098	12.0891	11.8495	11.6798	12.8254	11.1588	12.2846	11.8587	11.6665	12.0421	11.1516	11.8378	12.1101	12.2163	12.1866	11.6306
VAMP4	8.45298	8.70362	8.86872	8.56043	8.49193	8.37628	8.26361	8.49792	8.35993	8.632	8.67079	8.51165	8.63384	8.70602	8.6242	8.19673	8.75141	8.62525	8.36877	8.61611	8.74855	7.64556	8.24627	8.23001	8.44606	8.40338	8.94887	8.69431	8.23763	8.88395	8.39117	8.67511	8.81983	8.76243	8.78468	8.94618	8.54815	8.11757	8.61284	9.0079	8.22885	8.41332	8.11577	7.97539	8.97532	8.66	8.70925	8.51663	8.75251
VAMP3	10.8378	10.8623	11.2503	10.9867	10.8474	10.4013	11.1228	10.9533	10.9967	11.0923	11.5565	10.977	10.7366	11.4013	11.3129	11.0122	11.0406	11.3458	10.8216	11.037	11.3171	10.3775	11.1849	10.6377	10.7445	11.4239	11.3122	10.7534	10.809	11.467	10.9935	10.9191	10.6783	11.2378	11.3751	11.0858	11.168	10.7834	11.0078	11.411	11.1247	10.4871	11.3889	10.6369	11.1444	11.135	11.2407	11.1	11.1644
VAMP2	10.1863	9.9583	9.9583	9.80004	10.1495	9.45071	9.94742	9.84211	10.0657	10.1549	9.80547	10.2051	9.60881	9.85287	10.0266	10.0581	10.2848	9.91214	10.2006	9.62294	10.292	9.26235	9.52918	9.7713	10.1343	10.4594	10.1526	10.071	10.2072	10.1002	10.011	10.1557	9.86951	9.90305	10.1298	10.0787	10.1243	9.7555	9.82156	10.1091	10.2644	9.73803	10.1343	9.383	9.88011	10.3014	10.2458	10.2693	10.4124
VAMP1	6.59082	6.04956	6.18808	6.09644	4.62933	5.52716	5.79657	5.50112	6.06909	6.0888	6.08134	5.1221	6.44554	4.88975	5.38368	6.13091	6.44964	5.50398	5.91537	5.62688	6.04135	4.91378	6.46313	5.3367	5.34625	5.59935	6.43019	5.56619	6.40319	6.25749	5.71095	7.11308	6.05186	6.48546	5.78405	5.4193	4.95278	6.6867	5.73893	5.52387	6.76263	5.62459	6.28353	6.6305	5.66746	5.51225	5.8639	5.52387	6.77412
VAC14	6.96883	6.67235	7.03126	6.37685	6.87643	7.27403	7.14209	7.25225	7.08005	6.57989	7.82875	6.6889	7.32729	7.3381	6.60681	6.93087	6.69764	6.6226	6.92638	7.36326	7.27546	7.44614	7.2306	6.9828	6.66416	7.17998	6.99249	6.81677	6.60242	7.31842	6.8376	6.48328	6.05642	6.78175	6.54897	6.75077	6.67425	8.07253	7.43921	7.0925	6.88312	6.77308	7.96528	7.08717	6.79	6.94681	7.42804	6.77544	7.16298
UXT	12.0458	12.1198	12.0818	12.0094	12.0469	12.2623	12.1236	12.0783	12.224	11.9886	12.153	11.7796	12.2061	12.0818	11.8418	11.9592	12.3096	11.7749	12.0432	12.1932	11.9328	12.128	12.0357	12.1022	12.2536	12.0905	11.9756	12.0094	12.25	11.9508	12.0357	12.1473	11.8255	12.0505	11.9328	12.1689	11.9977	12.4662	12.2716	11.9131	12.1895	12.618	12.3924	12.2355	12.0443	12.0783	12.0654	12.1062	12.1503
UXS1	7.55604	7.63054	7.97794	7.82202	7.52929	7.50278	7.34488	7.80166	7.78225	7.70582	7.78369	7.93614	7.42212	7.63582	7.82707	7.49904	7.75865	8.09772	8.02226	7.5322	8.2378	7.14084	7.65808	7.49535	7.74242	8.17479	8.00078	7.96672	7.68583	7.84362	7.77418	7.00616	7.92635	7.55448	8.09676	8.05105	7.96165	7.48376	7.75732	7.91725	8.10377	8.05361	7.63236	6.94051	7.86021	7.68809	7.97366	7.73029	8.08354
UTY	2.34678	4.42274	5.69589	5.35833	1.96037	5.74428	2.10588	2.22948	2.3966	2.96637	4.6101	6.53009	5.0105	5.7312	2.12328	3.48596	2.33364	6.20241	6.02367	1.93307	4.67807	4.51106	5.36831	2.37091	6.18644	4.38585	3.05526	5.4618	5.91623	4.82413	2.42678	5.99064	6.03522	4.90733	5.98202	2.18136	5.89081	4.50472	4.92533	6.28408	2.06876	5.79403	2.28996	4.79701	4.75892	5.72382	5.16607	2.2763	4.63844
UTS2R	7.81412	8.78043	9.60819	8.74029	8.93506	9.59052	9.40982	8.22747	8.2625	9.26561	8.42571	8.66944	9.09137	8.56785	9.13862	8.99985	9.52768	9.07484	8.48145	9.83968	9.45982	9.1262	9.13291	8.6309	9.21158	9.32176	9.09709	8.63501	8.42268	9.18586	9.04628	8.80591	7.41608	8.49623	8.95927	8.24924	8.85671	9.50346	9.63297	8.9085	7.81976	6.14218	9.6734	9.64738	9.52017	8.97657	9.37221	9.05661	9.72783
UTS2D	4.53576	5.0186	5.09551	4.20457	3.84769	5.47427	4.51395	3.97628	4.20268	5.07357	3.91896	5.43905	5.33365	4.67525	4.80545	4.15674	4.96178	5.29594	4.97522	4.20457	4.62512	4.71468	5.16839	4.38879	5.25636	4.2356	1.9924	4.92688	5.06337	5.35554	4.43884	5.6686	4.28409	4.80079	5.33069	5.34935	4.27558	4.17411	3.98245	4.62378	4.51576	4.97672	4.33052	4.80211	5.32963	4.74343	4.47886	4.80079	5.0996
UTS2	5.71108	5.65963	3.40439	5.5628	2.85983	2.37888	4.62574	4.18304	6.68404	5.22409	2.15239	3.38332	7.44213	4.65938	3.42194	4.58239	3.747	4.05449	2.43339	2.45386	2.35931	4.68309	4.94588	2.39072	4.37638	2.49467	6.8297	2.87423	4.417	5.2035	2.47172	4.08616	2.37695	4.59346	2.36148	5.11572	4.60139	4.98544	4.49655	4.94255	3.1811	5.83399	2.88707	5.05546	3.70817	5.8554	4.4811	2.33221	2.71932
UTRN	9.70228	9.75675	9.90092	9.41052	9.78126	9.90353	9.76352	9.44924	9.63062	9.86442	9.40401	10.2066	9.07083	9.75238	9.84355	9.62423	9.3888	10.221	10.2926	9.45628	10.1326	9.66709	9.40401	9.72288	10.0156	9.91904	9.9985	9.94757	9.84821	9.88324	10.096	10.0292	9.99793	9.8106	10.2845	9.78126	10.0205	8.98142	9.5127	10.0503	9.5071	9.56191	8.40315	9.14266	9.76889	10.0102	9.90585	10.1037	9.40308
UTP6	10.1948	10.3943	10.461	10.4372	10.4272	10.3311	10.5436	10.7856	10.5424	10.4251	10.5805	10.3527	10.6371	10.5549	10.2128	10.2522	10.3253	10.3184	10.4088	10.1988	10.3708	10.0158	10.543	10.5982	10.4039	10.0707	10.6055	10.5903	10.4426	10.5842	10.3489	10.4144	10.9375	10.4682	10.7064	10.4219	10.4282	10.7415	10.6084	10.3822	10.3282	10.7859	10.1403	10.483	10.5655	10.5767	10.1976	10.5262	10.3335
UTP3	9.51373	9.91845	9.81138	9.86827	10.5635	9.90302	9.93657	10.6649	9.74846	10.2678	9.88518	9.9981	9.98943	10.052	9.84707	9.94642	9.80609	10.0823	9.98757	9.41452	9.82667	9.86912	9.85358	10.7437	9.89339	9.43989	9.90272	10.1668	9.69829	9.45382	9.84934	9.89339	10.9439	9.7326	10.032	10.01	9.88066	9.95295	9.71633	9.66347	9.90272	10.0382	9.02657	10.1815	9.72941	9.62841	9.91339	9.96992	9.40428
UTP23	8.36404	8.65247	8.44042	8.18508	8.65511	8.38798	8.69118	8.65332	8.81235	8.52103	8.20764	8.20634	8.309	8.25857	8.50067	8.05918	8.38023	8.37313	8.6159	8.50242	8.12665	8.17319	7.99345	8.35158	8.07205	8.11374	8.31394	8.31873	8.23008	8.45373	8.46509	8.47631	8.54706	8.15879	8.8067	8.47749	8.30743	7.97866	8.54706	8.36161	8.22848	8.20047	8.23181	8.31339	8.70933	8.31628	8.07356	7.77384	8.147
UTP20	5.07788	6.01731	5.97709	5.92228	6.85419	6.59691	6.32229	7.20996	5.96084	6.04807	6.03347	5.40234	6.5537	6.16274	6.06195	5.54171	5.86199	5.80597	5.69654	5.88202	5.46076	5.87664	5.99267	6.5269	5.84289	5.62429	6.03647	5.86452	5.67	6.04196	5.97577	6.14619	6.47503	5.63254	6.23179	6.09975	5.68018	5.58571	6.05975	5.94492	5.7665	5.7404	5.77337	6.13426	5.98171	6.01366	5.75219	5.44815	5.91148
UTP18	8.43576	8.76579	8.43682	8.69152	9.04474	8.63263	8.64936	9.37724	8.5435	8.6459	9.21715	8.53236	8.66078	8.92732	8.38986	8.52608	8.48978	8.84617	8.80325	8.32815	8.55738	8.87073	8.85198	9.16204	8.47154	8.41948	8.65354	8.86536	8.59431	8.37351	8.67796	8.56658	9.25531	8.81279	8.26645	8.66734	8.57193	9.17611	9.04547	8.49644	8.7641	9.28329	8.84496	9.02955	8.39825	8.44996	8.88197	8.68767	8.6196
UTP15	7.0199	7.33589	7.10697	7.20969	8.0709	7.8439	7.41989	8.6538	7.24588	7.27407	7.36512	7.61839	7.17395	7.38096	7.36859	7.15731	7.51056	7.87091	8.01728	7.02199	7.60204	7.58608	7.16865	8.36917	7.27727	7.48152	7.24399	8.01016	7.7751	7.22981	7.32516	7.36859	8.11791	7.33866	7.83132	7.40076	7.25145	7.47656	7.1917	7.19339	6.96826	7.48761	6.85603	7.19412	7.20197	7.48088	7.54548	7.42939	7.48549
UTP14C	8.61595	8.70148	8.98971	8.91504	8.82322	8.9268	8.70148	9.20776	8.63766	8.85705	9.0916	8.69591	8.81143	8.76846	9.00369	8.28294	8.68432	8.8971	8.45292	8.77937	9.13037	8.41841	8.66719	8.69412	8.70427	8.90385	9.08068	8.76322	8.55053	8.88669	8.81318	8.78568	8.60535	8.87693	9.07906	9.0294	8.88089	8.57229	8.76194	8.9711	8.87597	8.75996	8.42326	8.38519	8.84972	9.06784	8.8577	8.72433	8.85705
UTP14A	8.02897	8.13108	7.93854	8.35316	8.59194	8.44613	7.99757	9.64064	8.41214	8.18095	8.51943	7.83689	8.31986	8.22185	8.09925	8.2653	7.99383	7.75993	8.08027	8.23219	8.24174	8.27347	8.25999	8.60225	7.88255	7.86039	8.89686	8.06597	7.92897	8.05926	7.96006	8.82995	8.4817	7.93618	8.25138	8.2386	8.18572	8.9122	8.59866	8.16436	8.65119	8.54745	8.56909	8.3568	8.03732	8.13573	8.22831	7.85198	7.63389
UTP11L	7.94367	8.27818	8.11246	8.59164	9.25466	8.90586	8.19108	9.60467	8.62789	8.81148	8.53046	8.66032	9.0217	8.61895	8.65819	8.74916	8.69068	8.42167	8.11572	8.31554	8.14326	8.74765	8.54976	9.55705	8.34815	8.14073	8.2808	8.6046	8.3424	8.81076	8.01603	8.81332	9.62117	8.54168	9.14385	9.058	8.5013	8.4803	8.77101	8.53975	8.69803	8.91561	8.6626	8.43926	8.59633	8.40307	8.35695	8.55228	8.51162
UST	7.50758	8.17207	8.04071	7.82438	8.51032	7.47585	7.36345	9.04754	7.63285	8.30823	7.3416	7.77479	8.11371	7.42649	8.46961	7.59003	7.87168	7.95438	7.36345	7.66078	7.39855	7.82899	8.12418	8.31451	7.87228	7.19728	7.61198	7.8086	8.07731	7.42138	7.51515	9.24839	8.4333	8.33995	8.21568	8.07455	7.70606	6.96513	7.92373	8.1949	8.16619	8.11447	7.56051	7.70753	8.05966	7.49737	7.66927	8.06927	8.45004
USPL1	8.2132	8.91297	8.32386	8.81396	8.65154	8.50769	8.25919	9.08101	8.52594	8.49742	8.48957	8.42587	8.49786	8.51402	8.87435	8.63134	8.31226	8.94929	8.31887	8.18109	8.74802	8.17125	8.32333	8.66464	8.1892	8.12783	9.11077	7.98426	8.10039	8.51122	8.86551	8.86249	8.78368	8.78156	8.76735	8.86355	8.82683	8.70201	8.79103	8.43958	8.71135	8.64777	7.59056	8.67332	8.71076	8.62468	8.44745	8.39353	7.94852
USP8	8.97432	9.14049	8.84458	8.95674	9.03615	8.88623	8.85011	8.89443	8.87626	9.14614	8.9109	8.86957	9.00537	9.07991	9.04604	9.09446	8.67522	8.90705	8.74733	8.92483	8.43377	8.92643	8.91626	8.90271	8.56112	8.38205	8.89443	8.88675	8.50153	8.76567	8.72926	8.9867	9.01458	9.29178	9.00779	9.04181	8.91601	8.51415	9.05956	8.71805	8.80054	8.90863	8.23605	9.07971	8.99795	8.98199	8.70889	8.82545	8.49415
USP6NL	7.55252	8.04608	7.84097	7.71149	8.08273	8.24671	7.4754	8.41009	7.38217	8.30276	7.881	8.29633	7.55119	7.82611	7.75945	8.17475	8.03001	7.98404	8.39073	7.90169	8.22677	8.13326	7.62299	8.30006	7.68624	8.06433	7.81853	8.20056	8.02607	8.21933	7.62219	7.64867	8.32465	7.97983	8.51105	7.99073	7.92748	7.70781	7.79407	8.24147	7.9415	7.94295	7.31669	8.17196	7.67667	7.52233	8.09694	8.10923	7.66112
USP6	4.21176	5.30326	5.63557	5.6422	4.01899	4.63965	4.4443	3.74547	5.28517	4.50213	2.64824	4.92385	3.25948	4.5737	5.47325	6.37408	3.84131	4.05981	5.13964	3.8472	3.6346	3.94627	5.24275	3.38473	5.22479	4.31563	4.32487	5.67241	5.67348	5.11151	3.05899	5.25344	5.99885	3.34537	5.16508	4.71379	4.15441	4.31234	4.59253	5.08828	3.53973	5.49545	4.13369	3.90096	3.74461	6.28496	3.60015	3.95871	4.39961
USP54	9.60704	8.72148	8.8688	8.87823	9.15341	9.09719	9.02826	7.90586	9.3179	9.35778	8.77132	8.99788	8.54583	8.5579	9.35211	9.25657	8.82577	9.14398	9.02074	9.07464	9.41111	8.929	8.09769	8.43667	8.67286	9.15417	9.2171	8.78424	8.88177	8.73452	9.16594	7.71596	8.04147	9.47541	9.64384	9.08823	9.07292	8.42776	8.66407	9.01719	9.20739	8.65972	8.5163	8.71852	8.88468	8.45407	9.0651	8.99225	8.77695
USP53	8.67518	9.00467	8.14677	8.26409	9.20432	9.00235	8.3004	8.95854	9.13881	9.27299	9.26004	8.84454	8.41367	8.20189	6.29392	8.84274	9.49788	8.05477	8.60257	7.91684	8.60841	8.47315	7.90462	9.29629	8.77223	8.53235	8.89634	8.18082	7.797	8.58784	8.0204	9.70105	8.42183	8.83294	8.56955	8.62207	8.8028	7.75347	8.88515	8.41915	7.70974	7.98127	8.12136	8.26887	9.23318	8.5876	7.58005	8.18126	8.63731
USP5	9.34818	9.04292	9.14826	9.45145	9.49214	9.84917	9.6355	9.29998	9.37971	9.26596	10.0305	9.44574	9.58655	9.56588	9.43436	9.37597	9.69056	9.54603	9.56311	9.85821	10.0147	9.48464	9.80855	9.68108	9.66498	9.8477	9.83394	9.69119	9.67199	9.66098	9.50176	9.43469	9.10438	9.32333	9.37597	9.71567	9.48322	10.3763	9.37646	9.58655	9.73056	9.35084	10.177	9.36231	9.40093	9.18072	9.8011	9.67098	9.79391
USP49	7.47643	7.45129	8.26423	7.49744	7.42973	8.13428	8.37189	7.92512	8.57404	7.66277	8.47737	7.80717	7.73661	8.25474	7.38851	5.92136	7.38292	7.41598	9.57533	8.5629	8.2366	7.70165	7.98702	7.28	8.10393	8.29636	7.7875	8.02463	8.14081	8.2248	8.18429	7.80352	7.45849	7.92842	8.64331	8.03702	7.69678	7.46342	8.54318	8.11283	8.42611	7.8987	8.33911	7.13073	8.0829	6.39928	8.28918	6.99099	7.17064
USP48	9.28896	9.66826	9.37811	9.55332	9.42363	9.4664	9.37524	8.96076	9.50861	9.39716	8.96135	9.55535	9.70171	9.36635	9.40143	9.13694	9.47175	9.39546	9.35231	9.31984	9.28032	9.78598	9.42079	9.30251	9.63168	9.06081	9.30511	9.47319	9.30104	9.24885	9.53839	9.84747	9.24133	9.45175	9.50184	9.39254	9.40718	9.507	9.69759	9.39788	9.23996	9.68462	8.48776	9.66655	9.34035	9.6354	9.26775	9.41933	8.98781
USP47	8.6115	8.20014	8.69671	8.53201	8.6298	8.45522	8.2856	8.14033	8.65597	8.57872	8.29904	8.87506	7.96401	8.39616	8.52921	7.95634	8.78662	8.69225	8.95084	8.25434	8.93879	7.67006	8.3833	7.94346	8.43243	8.91763	8.79854	8.68844	8.58661	8.80134	8.73829	8.12473	8.44419	8.68632	8.50938	8.58483	8.66001	7.90824	8.446	8.84527	8.24297	8.37461	7.84769	7.39826	8.84695	8.46612	8.78487	8.59539	8.45757
USP46	5.64074	6.29336	5.92567	6.14677	6.31439	6.64497	6.07158	6.44737	5.59447	6.06121	6.36916	6.2736	6.64417	6.44153	6.06417	5.7971	6.28329	6.47549	6.59118	6.45961	6.02076	6.66275	6.05083	6.54298	6.29212	5.86987	6.29443	6.10427	6.19396	6.38475	5.82441	6.63234	6.57775	5.81165	6.16348	6.49299	6.15295	6.2104	6.17892	6.13675	6.15406	6.16659	5.81792	6.53909	6.22251	6.16847	5.89161	6.21244	5.83461
USP44	5.33648	4.303	6.01583	5.50653	5.82061	5.20993	5.9181	5.4946	6.19468	4.97804	5.82162	5.44613	4.71458	5.76271	4.88602	3.99761	4.43055	4.35952	5.73478	4.8559	5.70321	5.18339	4.6349	5.33017	4.80028	5.22712	5.7123	5.18103	5.14595	4.47213	5.68587	2.9867	4.49558	5.05317	5.86074	5.8329	5.29582	5.55047	5.87402	4.88353	5.94237	5.67958	4.49984	3.16708	5.31089	3.71887	5.78169	5.57144	5.70464
USP43	7.23257	5.06084	6.76966	5.86743	5.69956	5.89612	6.28357	5.07149	6.30176	4.75809	5.51736	5.39773	4.84306	5.61524	6.39149	5.2147	5.16499	5.81478	6.04601	6.84391	6.21353	5.20762	5.18328	5.2156	5.57094	5.93188	6.60236	5.46352	5.009	6.18546	7.07076	3.12665	5.16713	7.15294	6.14797	6.19809	5.73575	5.62385	5.81403	6.05557	6.39443	5.08927	6.04849	8.46962	7.30378	5.19157	6.02824	4.79971	6.05156
USP42	9.97471	10.2552	10.1557	10.0447	10.5517	10.2211	10.5382	10.557	10.545	10.3461	10.1207	10.0921	10.1801	9.95244	10.3398	10.6552	10.1632	10.3479	10.328	10.6114	10.6672	9.50235	10.0902	9.96961	9.56013	10.1496	10.5292	9.86122	9.89951	10.3041	10.4548	10.344	10.399	10.6545	10.7618	10.2366	10.1253	10.5562	10.4835	10.4406	9.9982	9.86366	10.4843	10.7518	10.5005	10.3589	10.0045	9.4806	10.1406
USP41	6.29093	6.22462	5.75321	5.84113	4.67509	6.83905	6.14357	4.70537	5.74924	6.2138	6.51122	6.04366	5.40289	6.26867	5.64669	6.14707	5.68344	6.46346	5.50582	5.77591	6.20474	5.8626	6.52586	6.29205	5.86602	6.24607	5.85738	5.81151	5.42966	5.58199	5.87579	5.76707	4.70068	5.66087	6.05579	5.74849	5.77465	6.15464	5.82212	5.72972	6.38312	5.71234	6.24793	5.64194	6.1462	5.81773	6.19972	5.60439	5.45779
USP40	6.13723	6.03521	6.18785	6.20389	6.60674	6.11233	6.43773	6.2138	6.14936	6.23025	6.4317	6.59651	6.07831	6.20356	6.22057	6.64177	6.05984	6.59977	6.20184	6.14301	6.51614	6.34611	6.01214	6.50336	6.16614	6.31717	6.34733	6.41579	6.37211	6.14235	6.47881	6.07831	6.1353	6.23252	6.39035	6.43525	6.23025	6.33743	6.19341	6.31818	6.33129	6.12765	6.23317	6.04288	6.20756	6.1323	6.42718	6.40892	6.57221
USP4	10.4106	10.6283	10.6849	10.4824	10.6897	10.3364	10.8026	10.4309	10.5617	10.4752	10.4197	10.7356	10.3289	10.6225	10.6207	10.5475	10.4893	10.4752	10.6407	10.509	10.6503	9.88412	10.4907	10.3514	10.361	10.5199	10.6031	10.6633	10.4966	10.5887	10.5933	10.3314	10.4422	10.6675	10.9441	10.3212	10.6751	10.6721	10.8464	10.7254	10.4631	10.549	10.4542	10.3262	10.4852	10.8774	10.71	10.3929	10.7303
USP39	11.3388	11.0559	11.142	11.0206	11.2696	11.2282	11.1473	11.3167	11.2946	11.0228	11.1942	11.142	10.9697	11.1852	11.2876	10.9096	11.1244	11.2717	11.3191	11.5187	11.4327	11.4004	11.3237	11.143	11.1056	11.3364	11.3673	11.1585	11.144	11.2097	11.2579	10.8546	11.0668	11.1734	11.0712	11.1138	11.0477	11.4249	11.2249	11.1528	11.3312	11.144	11.2007	10.9596	11.1381	10.9985	11.2876	11.1461	11.1484
USP37	8.01554	8.07015	8.14467	8.07092	8.67527	7.84838	8.0174	8.31103	7.85261	8.54168	8.20754	8.24127	7.72512	8.14594	8.3043	8.56167	8.13229	8.08975	7.90204	8.23396	7.86388	8.12803	8.00057	8.04323	7.8917	8.17491	8.04558	7.98024	8.08485	8.17545	7.87742	8.11483	8.33712	8.06631	8.46561	7.75975	8.25622	8.20816	8.40074	8.09995	7.86728	8.13706	8.00696	8.13763	8.1527	8.1245	8.23113	8.01919	8.28648
USP35	7.83011	7.86987	7.83011	8.05451	7.1363	7.88006	7.7429	6.9683	7.68465	7.025	7.62986	7.88631	7.77778	7.37515	7.76273	7.77413	8.14685	7.59058	8.00918	7.48476	7.73017	7.97424	7.81526	7.2609	7.87975	8.23632	8.10555	8.03316	7.99367	7.8327	7.41559	8.10237	7.5009	7.55124	7.36711	7.30814	7.71836	7.83584	7.49146	7.93315	8.10431	7.61566	8.04352	6.95726	7.72481	8.0974	7.60755	7.8831	8.02937
USP34	9.56912	9.51121	9.58613	9.76632	9.49654	9.4177	9.29461	9.52016	9.71671	9.49449	9.36333	9.13509	9.55734	9.37953	9.49178	9.58194	9.1729	9.32786	8.99002	9.62177	9.54709	9.28717	9.38656	9.05724	9.36598	9.19569	9.46249	8.94834	8.88618	9.46249	9.65205	9.48782	9.16292	9.51145	9.69645	9.42403	9.5236	9.53567	9.40217	9.43775	9.43098	9.34279	8.84573	9.47579	9.33924	9.41525	9.56281	9.07065	9.32627
USP33	9.11029	9.6901	9.39144	9.01043	9.48794	8.94513	9.29146	8.82707	9.01509	9.53437	8.52168	9.73585	9.14734	9.57598	9.44471	9.24963	9.36436	9.55184	9.42279	8.18566	8.45788	8.99346	9.20115	9.24829	9.39342	9.49266	8.79857	9.76405	9.47628	9.22569	9.43138	9.52071	9.55423	9.17014	9.50629	9.09655	9.51078	8.31731	8.46796	9.39976	9.38978	9.78226	8.24232	8.35596	9.00892	9.79076	9.48076	9.11433	9.68527
USP30	4.90356	6.42181	6.60921	7.44389	4.51002	5.63166	4.5178	4.3403	6.26	5.77329	5.25434	5.74387	4.82432	5.53574	5.58155	7.46787	5.50126	4.51348	5.81432	4.49065	5.52025	4.47985	6.30612	5.04735	6.50536	5.75808	5.12446	6.02983	6.70404	6.14211	4.81069	5.81164	6.97578	4.9601	5.7329	6.0599	4.63805	4.88037	6.1823	5.99647	4.68932	6.41845	5.20341	4.34885	4.29984	7.52392	5.14139	4.85881	5.07995
USP3	9.54066	10.0889	9.97467	9.90342	9.95696	9.45497	9.72878	10.0288	9.98534	9.59107	10.3183	9.73632	10.1046	10.1428	9.69886	10.1825	9.45941	9.69069	9.52372	9.80685	9.48492	9.69461	9.89839	9.82039	9.61615	9.38383	9.74606	9.72228	9.69605	9.93605	9.74415	9.61663	9.88842	9.90083	9.44492	9.94654	9.78519	9.95187	10.3458	9.59225	9.75474	9.77952	9.6784	10.0019	9.66588	9.93514	9.89551	9.72469	9.6466
USP27X	4.66851	3.71817	3.41075	2.25945	4.74464	4.82807	2.32885	4.46962	3.9447	4.22972	4.30738	3.81652	5.06215	3.96979	4.68262	4.63497	4.17661	3.62318	4.16574	4.45009	4.97834	4.65383	3.48	2.85671	3.38011	3.09771	3.82285	2.2435	2.05685	4.47125	3.22544	4.64497	3.6117	5.74105	4.05167	4.6787	3.9557	3.34848	2.99572	4.21866	4.72276	2.50317	3.07609	4.62019	5.09594	2.41659	4.07115	2.2532	4.38165
USP26	2.64588	2.83181	2.95287	2.60543	2.56595	2.58701	2.65453	2.62427	2.69278	2.59552	2.61678	3.509	2.64346	2.6342	2.60466	2.62502	2.67586	2.63144	2.58899	2.59177	4.14656	2.58235	2.51735	2.60827	2.60466	2.60404	2.56595	2.55315	2.56431	2.71056	2.61678	2.62228	2.5699	2.65328	2.6801	2.61902	2.86883	2.56291	2.66936	2.65206	2.58554	2.63057	3.92582	2.65453	2.6624	2.59962	2.60106	2.53067	2.57353
USP25	6.45761	6.74748	6.52996	6.34517	6.63022	6.36919	6.45013	6.76311	6.16139	6.89756	6.65835	6.56282	6.05828	6.76446	6.87661	6.7054	6.33524	6.76182	6.41359	6.11293	6.59091	6.32439	6.22758	6.44809	6.24414	6.47677	6.98276	6.59289	6.18218	6.56016	6.60979	6.77866	6.52846	6.82022	6.53092	7.144	6.56447	6.1394	6.50503	6.65076	6.21754	6.46456	5.68966	6.30016	6.54355	6.68029	6.63156	6.56743	6.08918
USP22	9.33748	9.00158	9.20691	9.19272	9.15464	9.34875	9.07714	9.22397	9.15009	9.06975	9.39608	8.95491	9.45943	9.02246	9.05714	9.19479	8.91021	9.26786	8.91115	9.14487	9.53641	8.81501	9.20727	9.21366	9.01022	9.61126	9.34026	9.05232	9.08303	9.70481	8.95665	9.1053	9.33054	9.29958	9.43344	9.30593	9.41128	9.19972	8.7331	9.44067	9.31502	8.97875	9.31502	9.53267	9.35679	9.34092	9.14974	9.30724	9.65141
USP21	7.84401	6.95504	7.63781	7.23814	7.28728	7.34953	7.39154	7.29902	7.56366	7.31397	7.56416	7.50375	7.30813	7.58388	7.45145	6.83496	7.2956	7.34073	7.33981	7.34364	8.07475	6.56504	7.41313	6.86257	7.43677	7.85151	8.01935	9.54183	7.52064	7.6238	7.59723	7.22223	7.2017	7.6161	7.45145	7.35397	7.65937	7.69574	7.46638	7.48922	7.62477	7.24865	7.83313	7.20366	7.78992	7.21719	7.66713	7.50935	7.97643
USP2	6.23431	4.78289	3.16439	3.04675	4.80506	2.77608	2.7072	4.43553	4.0996	5.1754	4.08599	3.38005	3.92306	3.46126	4.39261	3.6639	2.8202	2.54336	2.81585	2.68106	3.79441	3.41343	2.68328	5.14632	4.37133	3.75826	2.30326	2.44723	2.39808	2.82324	4.14648	4.42218	3.7175	4.51084	3.06601	4.76031	3.16439	2.87154	3.70652	2.84485	4.82254	3.25389	5.17365	5.8477	4.538	2.50127	2.61491	3.97124	3.1053
USP19	6.50705	6.21521	6.18158	6.48146	6.18252	6.25329	6.32922	6.16521	6.31374	6.1621	6.84409	6.52309	6.16935	6.33122	6.43057	6.38682	6.19696	6.54521	6.15288	6.13545	6.80629	5.91865	6.29829	6.22085	6.44151	6.5109	6.6338	6.28594	6.25685	6.74624	6.35015	6.5122	6.2374	6.42759	6.46548	6.47275	6.48554	6.69056	6.35257	6.48394	6.70049	6.25452	6.86885	6.3126	6.50924	6.35628	6.37545	6.44277	6.63459
USP18	8.26834	8.53766	8.0325	7.89328	6.6721	9.25609	8.2167	6.59247	7.74573	8.03875	8.40486	8.0325	7.60792	8.43923	7.95073	7.77136	8.2938	8.61314	7.63819	8.18026	7.87101	8.08419	8.81298	7.27129	8.03219	8.25183	7.82442	7.85972	7.65816	7.91601	8.08753	7.65962	6.76604	7.61448	8.48331	7.83442	7.93601	8.0236	7.89274	7.78604	8.34156	7.72486	8.03625	7.58795	8.34948	8.01954	8.10454	7.78839	7.62018
USP16	11.0766	10.9885	10.9201	10.7775	11.1131	10.9949	10.9644	10.7008	10.7651	11.2076	10.4444	10.9574	10.5225	10.8882	11.0017	10.7484	10.7435	11.0248	10.8951	10.9001	10.7634	11.0547	10.7644	11.2323	10.8195	10.0975	10.8865	10.9435	10.346	10.524	11.0375	11.2336	11.1336	10.9313	11.17	11.0589	11.0267	10.5884	10.8609	10.7611	10.7334	10.8328	9.27721	11.1301	10.8558	10.7987	10.6916	10.7509	9.66148
USP15	8.52514	9.53969	8.63322	8.42934	9.55342	8.1244	8.81815	8.77176	8.80145	9.41949	8.07647	9.41949	9.29959	9.13709	8.87761	10.1286	8.48857	8.89889	9.11508	7.69936	7.65871	8.67319	8.75971	9.37806	8.82591	8.41342	7.9318	9.18124	8.85453	8.43663	8.65898	8.91294	9.70491	8.973	9.04926	8.68644	8.94777	7.9582	8.52786	8.95491	8.57112	9.50587	8.00954	8.45586	8.62188	9.68728	8.90792	8.87369	8.63935
USP13	8.684	9.04539	8.70594	8.65172	9.34154	8.77482	8.73899	9.12215	9.00369	8.80416	8.94701	8.87962	9.02783	8.52919	8.99082	9.3075	8.81105	8.81377	8.99024	8.20567	9.24247	8.35105	8.39534	9.01269	8.32703	9.05991	8.90729	8.96297	8.8503	8.67247	8.38256	8.9541	9.46137	9.59924	9.14301	9.17969	8.80478	8.18285	8.92927	9.14046	8.93442	9.18237	8.65956	8.13185	8.76224	8.43665	8.94179	8.8309	9.4314
USP12	4.79981	5.78908	5.42772	5.33933	5.58572	5.61378	4.46149	5.40062	5.13394	5.71455	5.53289	5.8684	5.72331	5.50256	5.1371	7.37161	5.15973	5.67722	7.82798	4.10937	5.23367	5.49469	5.06592	5.92095	5.09969	5.16992	6.91644	6.13024	5.08582	5.66039	4.63218	5.72602	6.4297	5.37719	5.39945	5.31243	5.90924	5.2117	4.9681	5.51781	5.3911	5.80257	4.62769	5.7686	5.14154	5.99716	5.15305	6.15331	5.98685
USP11	10.08	9.95694	9.92486	9.80754	10.287	9.99377	9.77491	9.90326	10.1214	10.1037	10.0942	9.67921	9.88099	9.60405	10.0488	10.1322	10.0065	9.8855	9.94307	10.1346	10.1536	9.06273	9.70727	9.79408	10.0509	10.0882	9.79962	9.65032	9.9347	10.0756	9.77986	9.87223	10.0923	10.1141	9.95118	9.94853	9.84927	9.712	9.73469	9.94138	9.89039	9.59134	10.2626	10.323	10.0774	9.92438	9.79149	9.71833	10.1226
USP10	6.17677	6.69089	6.4499	6.26858	7.63409	6.95279	7.11984	7.84762	7.30744	6.75069	7.23544	7.08838	6.83501	6.58149	6.60692	7.31795	5.87992	6.38123	7.13203	6.79423	7.04791	6.86886	8.25875	7.58375	6.45745	6.46542	6.85778	5.74389	6.69351	6.95129	6.8014	6.67813	7.70803	7.31071	7.35633	6.95687	6.62188	7.04791	7.10088	6.86251	6.84483	6.38278	7.40508	7.77879	6.89941	6.26858	6.47195	6.18539	7.85806
USP1	10.3835	10.0349	10.1332	10.0468	10.1547	10.1744	10.3011	9.94912	10.1493	10.0887	10.079	10.41	9.53714	10.1703	10.2038	9.75366	10.1101	10.4578	10.4132	10.2705	10.255	10.0255	10.1286	10.2505	10.0347	9.81867	10.3488	10.1843	9.92288	10.0499	10.2653	10.1744	10.1511	10.3531	10.2995	10.0409	10.3041	10.1359	10.0646	10.2323	10.0655	10.1278	9.17722	10.0499	10.1604	10.0646	10.1718	10.1555	9.51113
USO1	11.4943	11.4394	11.4697	11.7845	11.2771	11.4943	11.4047	11.5131	11.6563	11.3734	11.4648	10.8746	11.3482	11.2789	11.5852	11.0789	11.2674	11.2533	10.9562	11.0068	11.1413	11.4021	11.521	11.1454	11.297	10.867	11.336	11.297	10.8354	11.2045	11.6141	11.5555	11.1107	11.5988	11.2695	11.4865	11.3563	11.0721	11.4789	11.0646	11.2029	11.5142	10.5029	11.1397	11.4658	11.2789	11.0946	10.938	10.6304
USMG5	9.83856	9.69392	9.86966	9.45405	9.65881	10.1883	9.80382	9.54559	9.72295	9.76213	9.50773	9.69701	9.60965	9.80034	9.7488	9.25481	10.1539	9.87643	9.87244	9.93136	9.88369	10.0735	9.95686	9.7579	9.92112	9.5162	10.0019	9.90737	9.81462	9.74239	9.76814	9.67513	9.46193	9.56955	9.91083	9.77563	9.80382	9.84214	9.66238	9.76814	9.66238	9.12068	9.60388	9.79026	10.0058	9.7827	9.76814	9.80382	9.50217
USHBP1	7.77305	7.76685	5.98786	6.04612	6.41345	6.3813	6.29679	5.09263	8.12218	7.35663	7.98145	6.23156	6.78211	7.7855	6.96418	5.02274	7.86228	8.22203	8.48266	6.33754	8.82609	4.46925	5.60281	6.30489	6.8647	9.51694	7.14297	7.53627	7.4339	7.273	6.25431	6.56546	4.52415	7.35874	6.9136	5.97176	7.66693	5.98356	6.58875	6.94969	7.6357	5.56264	7.40268	3.67238	6.67325	8.76575	6.83319	7.60264	8.04304
USH2A	2.8531	2.83804	2.96261	2.79975	3.44622	2.83162	2.8404	2.76443	3.17844	2.86946	2.78098	2.88323	2.81122	2.86025	2.81952	2.85954	2.78222	2.78022	2.8415	2.70991	2.98333	2.78938	2.84835	2.88746	2.78395	2.75803	2.72959	2.72495	2.79851	2.76023	2.88816	2.84835	2.75157	2.76927	2.88566	2.81611	3.19054	3.21681	2.77594	2.82405	2.89361	2.84638	2.76837	2.76528	2.77383	2.75241	2.81806	2.72389	2.98575
USF1	6.75364	7.63465	6.61012	7.73509	6.79318	6.59412	7.07326	7.71757	7.14534	6.89734	7.72392	10.3023	7.1459	6.83028	6.91097	7.16824	6.73079	6.39414	7.03404	6.49109	10.0559	7.45531	7.44987	10.3756	6.5846	6.95133	6.94913	8.06227	7.24858	6.46873	6.9224	6.87818	7.37283	9.99802	6.22034	6.00793	7.34001	7.13634	6.61571	6.87093	6.98505	8.42299	6.99108	6.53004	7.10366	6.97326	7.83534	6.41219	7.01602
USE1	8.28269	8.56793	8.22449	8.10261	8.28427	8.41683	8.35858	8.72006	8.53538	8.34281	8.24247	8.39452	8.1175	8.21185	8.31203	8.31046	8.60033	8.03991	8.44096	8.43108	8.38164	8.40172	8.3025	8.36049	8.30335	8.44691	8.30139	8.63162	8.58545	8.3326	8.12128	8.46096	8.3095	8.02308	8.62718	8.20265	8.14748	8.58846	8.12186	8.43757	8.32878	8.46124	8.53368	7.82826	8.15857	8.39837	8.55039	8.33588	8.41231
UROS	8.90357	9.23878	9.06299	9.47198	9.1648	9.70856	9.70098	9.3077	9.20493	9.237	9.81333	9.06363	9.5779	9.58375	9.0237	8.88281	9.69541	9.46832	9.18391	9.42885	9.48315	10.0097	9.64301	9.50847	9.30424	9.45233	9.38987	9.37781	9.72611	9.33276	8.89586	9.37728	8.81746	9.05367	8.80845	9.34332	9.05795	9.78709	9.31641	9.29447	9.45834	9.80016	10.1461	9.1361	9.39455	9.32347	9.56853	9.26296	9.71248
UROD	11.6426	11.6083	11.9278	11.9351	11.4401	11.9568	11.7584	11.4923	11.7444	11.4201	11.6502	11.5008	11.897	11.9503	11.6378	11.3831	11.9488	11.4716	11.9561	11.5581	11.7786	11.8594	11.7143	11.4005	11.8131	11.8443	11.6378	11.9907	12.0515	11.5116	11.7494	11.8773	11.3422	11.4268	11.6459	11.8237	11.5977	11.7703	11.7913	11.7953	11.6691	11.8567	11.9782	11.0502	11.7375	11.6677	11.8787	12.0486	11.8815
UROC1	2.66698	2.94392	2.67347	2.69984	2.62018	2.64381	2.67069	2.69908	2.66698	2.64742	2.6892	2.68125	2.6455	2.73491	2.67868	2.6892	2.65414	2.69215	2.60695	2.82513	2.66465	2.6519	2.78584	2.67432	2.63355	2.63748	3.81207	4.46171	2.68172	2.94921	2.66215	2.64186	2.64294	2.68078	2.66215	2.67663	2.64783	2.6455	2.64783	2.64381	2.69794	2.65905	2.6883	2.70121	2.6799	2.60849	3.34395	2.60192	2.62316
URB2	6.72188	7.51583	6.92941	7.42732	9.06732	7.7659	7.37568	9.81477	6.88233	7.91416	7.70794	7.18511	7.89956	7.55306	7.33561	8.36167	7.23688	7.4952	7.14175	7.2136	7.18836	7.8475	7.54624	8.84859	7.15865	7.09604	6.97585	7.64555	7.68327	7.26374	7.37759	7.29376	9.5795	7.50452	7.96906	7.73923	7.34649	7.62784	7.9708	7.40548	7.33174	7.73493	7.62143	8.66354	7.15741	7.2789	7.25488	7.59622	7.51781
UQCRQ	13.504	13.3681	13.5587	13.4177	13.2953	14.0031	13.7216	13.2953	13.4873	13.3074	13.3971	13.3235	13.7216	13.6376	13.4061	12.7325	13.7401	13.5318	13.6526	13.5359	13.4698	14.0732	13.8135	13.685	13.6568	13.6257	13.352	13.735	13.8481	13.2534	13.504	13.2038	13.1004	13.2389	13.4311	13.6117	13.393	13.6568	13.4873	13.4224	13.5318	13.4996	13.6482	13.4433	13.5136	13.3389	13.4952	13.5667	13.4474
UQCRH	12.8866	13.0742	13.1368	12.9767	12.9613	13.2663	13.1617	12.9236	13.2236	12.9514	13.1797	13.0449	13.1587	13.2689	12.8325	12.7324	13.2791	12.9664	13.2269	13.3606	12.6628	13.5064	13.0828	13.1809	13.2515	13.1343	12.9664	13.3361	13.377	12.9362	12.9015	13.1587	12.9113	12.7713	13.0587	13.1459	13.0633	13.1428	13.2998	12.9189	13.025	13.5027	13.2141	13.0656	13.0633	12.9285	13.1617	13.2876	12.9849
UQCRFS1	12.3974	12.4326	12.5184	12.4227	12.6535	12.7188	12.7789	12.8988	12.4438	12.543	12.7493	12.3751	12.4998	12.6706	12.4364	12.2469	12.6231	12.4345	12.5121	12.7587	12.2963	12.8961	12.6272	12.7073	12.4175	12.5844	12.4475	12.5786	12.5844	12.4954	12.457	12.4633	12.6371	12.5089	12.4854	12.1784	12.389	12.7442	12.6582	12.461	12.4345	12.372	12.6853	12.7888	12.5775	12.3427	12.5162	12.5657	12.4553
UQCRC2	10.583	10.9624	11.3169	10.8898	11.0646	11.0659	11.3848	10.8985	10.6965	11.1445	11.1742	11.1692	10.887	11.3295	10.968	10.6142	11.3799	11.2106	10.8368	11.2325	10.9844	10.8985	11.1412	11.1837	11.1176	11.1361	11.089	11.2183	11.1427	11.0948	10.9294	11.3799	10.9035	11.004	11.1347	11.0431	11.2008	11.2436	11.128	11.1866	10.9231	11.16	11.0701	10.9231	11.0026	11.0809	11.2503	11.0392	11.0978
UQCRC1	11.3659	10.9845	11.1945	11.276	11.1081	11.1723	11.2692	11.145	11.3573	10.9759	11.4449	10.9056	11.3197	11.1146	11.1525	11.0686	11.2611	11.0328	11.1327	11.1696	11.1894	11.1231	11.2502	11.0761	11.2384	11.3553	11.0827	11.2406	11.15	11.0996	11.4293	10.8849	10.9644	11.1655	11.0451	11.5382	11.0174	11.646	11.2602	10.9922	11.2731	11.2461	11.6238	11.2966	11.1585	11.0389	11.2345	11.1686	11.3854
UQCRB	10.8514	11.082	11.3422	10.7531	10.9906	10.6421	11.0068	10.651	11.0521	11.2075	11.0303	10.9262	10.9167	11.3209	11.0107	10.8285	11.1157	10.8732	10.7663	11.0655	10.9139	11.1208	11.0277	10.6566	11.0415	10.7579	11.042	10.828	10.7197	10.7663	11.0131	11.1953	10.4871	10.9189	11.0618	11.1013	11.0201	10.8275	11.4859	10.8844	10.613	10.7438	10.8926	11.0023	11.2008	11.0463	10.8656	10.8306	10.2901
UQCC	9.27704	8.845	8.96729	9.01624	9.02389	9.09836	8.96433	9.02931	9.09166	8.84107	9.15932	8.94422	8.7676	8.80169	9.03715	8.82056	8.75079	8.83404	8.86534	8.74704	9.40228	8.74788	9.10339	8.73184	8.86034	9.19868	8.91408	8.7549	8.8414	8.96107	8.74704	9.14778	8.89953	8.9347	8.86534	8.87409	9.0778	9.39758	8.90294	8.95104	9.18864	9.19743	9.45601	8.77139	9.02062	8.91292	9.19804	8.7397	8.93085
UPRT	9.27042	9.55679	9.26393	9.319	9.35405	9.42702	9.27317	9.13345	9.16122	9.30483	9.55252	9.49337	9.1985	9.55204	9.31669	9.07752	9.31212	9.7641	9.53602	9.24615	9.20493	9.46087	9.36594	9.39031	9.13932	9.50731	9.48342	9.45074	9.49994	9.34564	9.30831	9.02695	9.58239	9.2863	9.46474	9.29876	9.31729	9.44275	9.2327	9.42767	9.20952	9.32014	9.26598	9.34292	9.29876	9.14715	9.43339	9.43339	9.28956
UPP1	8.34878	9.09524	9.50393	9.87765	10.2102	9.62363	10.1125	11.9524	9.71789	10.111	11.0659	9.65536	10.2205	10.656	9.60312	11.8189	9.42978	9.93578	9.69312	9.26478	8.92969	9.66245	10.3089	11.0818	9.5567	9.50749	9.16997	10.4826	10.4007	9.12518	9.20215	8.2777	10.9067	9.33612	9.06964	9.22021	9.45422	9.65589	10.2896	9.25103	9.09383	9.81761	10.5327	10.5012	9.1207	9.43999	10.0579	9.64575	9.81217
UPK3B	6.34103	8.37315	8.52829	7.7054	8.79809	6.83676	8.67807	8.47093	7.74467	7.7582	8.60962	7.0561	6.23433	7.80472	7.76513	9.1344	8.95967	8.9121	8.08975	6.12267	9.63772	7.53635	7.79353	8.71267	8.58831	7.01624	7.87328	7.83776	7.87425	9.23341	8.23932	9.0562	8.50957	8.44278	8.24303	8.94811	6.44379	8.87748	6.99715	9.38479	9.01629	8.23024	9.81775	6.85341	6.16191	7.96397	7.54798	8.822	9.03482
UPK1B	3.7248	6.90329	2.18967	3.21008	2.58316	2.20549	2.09304	2.15681	2.32639	2.54791	6.09717	2.17697	2.21844	3.84745	5.60012	6.37789	4.89732	2.09769	2.22769	6.02619	2.15239	2.08974	1.98323	2.18967	4.51156	5.46178	1.77787	1.99611	4.74047	2.36924	2.7781	8.86962	2.04972	2.08908	2.27398	4.41188	2.09039	5.07296	2.14213	2.31436	5.09878	2.15536	8.09034	2.7975	3.5415	2.08129	2.1492	4.83248	2.36034
UPK1A	2.47681	3.29932	2.69563	2.43505	3.53633	2.90146	3.52556	3.46216	3.17098	2.9457	3.32016	2.63003	2.92857	2.89579	3.11974	3.77116	4.26559	3.48752	2.58883	2.6229	3.29415	2.23557	2.73228	3.19816	2.8483	3.56839	3.10832	4.24023	4.68542	4.67154	3.20153	3.49256	3.36525	3.14773	2.64386	2.93715	4.44109	2.00024	3.00782	4.25655	3.69971	3.06749	2.13111	2.39864	3.02492	3.23574	4.17482	2.59106	3.67545
UPF3B	8.54231	8.75286	9.36383	9.29185	9.03831	9.16088	9.09247	8.00048	8.86657	9.22214	8.20782	9.13554	8.82778	9.3892	8.61467	8.65245	8.96201	9.13352	9.3554	9.00656	9.07337	8.70904	9.10907	8.91487	8.9218	8.31561	9.37274	9.35066	8.62408	9.10907	8.97219	8.89804	9.69548	9.48974	9.3542	9.06476	9.13314	8.87065	9.46856	9.12084	8.59997	9.0677	6.77151	8.86476	9.36227	9.10851	9.01221	9.02762	8.23711
UPF3A	9.26952	9.5897	9.80892	9.76987	9.43095	9.51113	9.54313	8.83629	9.39491	9.34281	9.16386	9.67859	9.00506	9.7468	9.53533	9.07397	9.52353	10.1971	9.38628	8.88097	9.1969	8.92853	9.1789	9.42214	9.44443	8.82167	9.73776	9.92496	9.23333	9.62481	9.59411	9.96975	9.80836	9.61214	9.8644	9.38109	9.80656	9.22046	9.29982	9.71609	9.66414	9.97003	8.33376	9.17643	9.70455	9.69842	9.20584	9.52556	9.18088
UPF2	9.26318	9.39639	9.57126	9.76791	9.278	9.33062	9.23121	8.96438	9.58859	9.3616	9.22353	9.6146	9.56347	9.40391	9.2735	9.49517	9.53304	9.64197	9.51438	8.99696	9.38596	8.43026	9.38273	9.28043	9.12674	9.06296	9.43452	9.70359	9.10665	9.4286	9.21918	9.86533	9.47482	9.36341	9.76456	9.51918	9.5215	9.30502	9.25087	9.39422	9.05609	9.62004	7.91742	9.28152	9.54298	9.65591	9.32822	9.03098	8.6854
UPF1	10.723	10.3966	10.6892	10.4086	10.8209	10.2896	10.5642	10.7155	10.2828	10.6535	10.3958	10.8092	10.3082	10.6044	10.5842	10.7033	10.6591	10.6892	10.6685	10.8125	10.8571	10.2636	10.6554	10.6737	10.6804	10.8254	10.7192	10.8671	10.8736	10.611	10.7423	10.4839	10.6667	10.8092	10.7155	10.4605	10.6571	10.6303	10.7265	11.0529	10.4762	10.5424	10.692	10.723	10.57	10.4086	10.7929	10.6044	10.8516
UPB1	5.67241	5.88565	5.91734	5.57309	5.38537	3.57538	4.8319	5.25761	5.84352	6.9506	6.5273	5.2566	4.37312	5.73041	5.22731	6.30664	5.24056	5.92785	6.32404	5.30441	6.0109	4.18934	5.60904	5.01307	5.37431	6.57471	6.49136	5.53564	5.21315	5.4376	5.56766	5.10193	7.20068	5.66904	5.86568	5.89628	5.41486	4.43368	5.01307	5.99933	5.21158	5.01692	5.2566	4.37962	5.49052	6.89234	5.58528	5.46401	5.2855
UNQ6975	2.34431	2.38783	2.33741	2.355	2.24947	3.53948	3.80985	2.34913	2.35162	3.13097	2.33252	2.36362	2.3027	2.37746	2.35585	2.36532	2.81918	2.35934	2.26534	2.30494	2.42814	4.06711	4.82472	2.36209	2.67016	2.3027	2.41818	3.18669	2.35241	2.57209	2.35162	3.3602	2.30897	2.31215	4.43408	2.45967	2.31687	2.35855	2.27396	2.31296	2.40204	2.35162	2.29542	2.31215	2.29267	2.28123	2.34594	2.27524	2.33522
UNKL	5.82804	6.06614	5.72055	5.39765	5.35614	3.36064	7.10977	5.66392	5.57826	5.88981	6.14105	6.79793	4.84106	5.54454	5.15624	5.80573	6.21741	6.05414	7.04432	5.34128	6.26708	4.30613	5.53194	5.19105	5.44331	6.12097	6.97676	6.24645	5.93428	5.9572	5.84271	7.97975	5.84479	4.62254	5.66215	5.56188	5.43732	5.31058	5.53518	6.59495	5.7974	5.38327	6.75325	5.12332	4.84508	5.41765	6.11314	5.75901	6.0128
UNC93B1	10.1405	9.17039	9.82411	9.5992	9.30859	9.49542	9.76633	8.94792	9.96074	9.64302	10.1274	9.44121	9.56282	10.0831	9.51073	9.33409	9.80342	9.43875	9.67049	10.1286	9.20229	10.2317	9.65093	9.3756	9.6815	9.63741	9.59262	9.84627	9.74066	9.51579	9.9319	8.95357	9.23285	9.6645	9.55665	9.62512	9.33387	10.4735	10.2375	9.31641	9.77762	9.73512	10.2092	10.4631	9.98407	9.24236	9.94478	9.76005	9.84169
UNC5CL	5.11459	5.1697	5.03981	5.56804	5.27002	7.9008	4.97047	6.55371	4.81145	5.11877	4.83053	4.65762	6.13563	4.72878	4.50179	4.3673	4.54635	4.83576	4.7461	5.13115	5.53186	6.33718	5.46333	6.35714	5.27098	4.24505	4.53202	4.67274	4.90532	4.50036	5.22536	5.27485	6.08327	4.94885	4.95482	5.45156	4.66236	5.96385	6.08575	4.44332	4.95927	5.01137	4.97288	5.37627	5.09123	4.81356	5.21901	4.58355	4.34164
UNC5C	3.86106	4.09079	4.51068	3.60421	4.3145	5.07772	4.41169	2.73473	3.94725	5.12746	4.60973	5.16166	3.29471	3.89576	4.30447	4.01258	5.19259	4.15711	2.82462	4.44867	4.62395	4.58636	3.62398	3.04768	3.03075	4.3243	2.92938	2.67585	4.54186	4.68814	5.058	4.48016	4.60858	3.5738	3.88286	3.74824	2.94868	5.01011	4.74855	4.16741	4.60075	4.51275	2.95981	3.15804	4.1133	3.95628	3.5601	3.02421	3.09642
UNC5B	8.36527	8.95708	8.98097	8.91187	9.11688	10.0901	9.25403	8.43887	8.68424	8.69932	9.20029	9.21285	8.59307	9.51114	9.01173	8.90403	9.10763	9.34789	9.44421	9.33641	9.05336	8.56787	9.06113	9.11839	8.73867	9.40602	8.70675	9.76055	9.56855	9.25709	8.82958	8.43887	9.51739	8.99672	9.12758	8.88433	8.92506	8.10535	7.77402	9.47778	8.50936	9.27089	8.72291	8.09347	8.69121	9.29845	9.25862	9.31622	9.50685
UNC50	11.9551	11.8197	11.9268	11.6354	11.8274	12.0628	11.7529	11.8808	11.786	11.6979	11.9933	12.1164	11.9016	12.0575	11.6104	11.311	11.7585	12.0428	12.2527	11.7428	11.8995	12.06	11.7761	11.9477	11.8305	11.618	11.8619	11.924	12.0524	11.8327	11.7649	11.8442	11.7797	11.7465	11.7627	11.884	12.0958	11.7809	11.734	11.9059	12.25	12.0141	11.3579	11.5249	11.8406	11.9167	11.8463	11.9577	11.8971
UNC45A	10.7384	10.2271	10.6087	10.4572	10.3159	10.8501	10.4989	10.1724	10.6909	10.4365	10.4023	10.3887	10.526	10.2244	10.3538	10.4764	10.9638	10.1665	10.7233	10.9001	10.8747	10.341	10.4671	10.0842	10.5901	10.8521	10.5452	10.4876	10.7558	10.6879	10.3072	10.47	10.3905	10.1992	10.6745	10.3585	10.6116	10.7269	10.4771	10.5669	10.4308	10.2124	10.9648	10.2632	10.5522	10.4264	10.6383	10.661	10.6325
UNC13D	8.5559	8.23761	7.94506	8.22516	8.40541	8.56184	8.60425	8.13711	8.49206	8.31477	8.82332	8.55074	8.23571	8.29386	8.24007	8.57707	8.46082	8.93679	8.68989	8.30707	8.72763	8.06908	8.4524	8.15557	8.3984	9.41602	8.6293	9.10905	8.9024	8.48558	8.63913	7.17062	8.34717	8.07472	8.60932	7.98317	8.59921	8.42447	8.40354	8.89432	8.42343	8.11102	8.85846	7.51007	8.50141	8.74368	8.71163	8.4993	8.88611
UNC13B	9.74298	8.91365	10.0964	9.57761	9.82264	8.93357	9.26595	9.3564	9.75759	9.63307	9.62818	9.80383	9.1036	9.25025	9.99227	9.54002	9.27816	9.45631	9.83179	9.20527	10.0434	8.99313	9.11821	9.00711	9.37433	9.88942	10.2711	9.78654	9.28474	9.48633	9.57415	7.8497	9.62064	10.2143	9.7827	9.55805	9.85878	9.3957	10.1604	9.73929	9.8273	9.46429	9.4191	8.67603	9.62092	9.12433	9.8243	9.78869	10.3525
UNC13A	2.83347	2.78104	2.76265	2.80202	2.74646	2.79657	2.86474	2.81128	2.84671	2.82772	2.79569	2.77887	2.83256	2.80853	2.83646	2.83347	2.81772	2.78396	2.77771	2.78704	2.79476	2.8004	2.73701	2.7996	2.8346	2.80238	2.63935	2.75096	2.76342	3.48785	2.85691	2.84671	2.77554	2.83926	2.88931	2.82678	2.83693	2.81032	2.86268	2.87652	2.79131	2.84671	4.37639	2.83403	2.84358	3.41654	2.78104	2.76466	2.82215
UNC119B	9.76461	8.46638	8.93886	9.00103	8.27449	8.33348	8.38338	8.20881	8.80755	8.31335	8.4546	8.35885	8.36513	8.17404	8.78814	8.27991	8.65472	8.7794	8.12726	8.16828	8.59997	8.16944	8.53411	8.29573	8.95868	9.01167	8.55171	8.72879	8.56325	8.44445	9.09834	8.50105	8.27691	8.9909	8.80692	8.61467	8.68671	8.23539	7.92992	8.65713	9.30202	8.77503	8.4977	9.01639	8.94448	8.45583	8.51377	8.20965	8.87394
UNC119	7.76757	7.90383	7.96024	8.13759	7.55975	7.92732	8.15246	7.49037	8.00279	7.73129	8.24561	8.06437	8.07934	8.02778	7.74847	8.36107	8.12178	8.22992	7.96505	7.88683	8.03983	8.46468	8.35571	7.82078	8.30185	8.2841	8.1446	8.16637	8.32864	7.88366	8.00602	7.87857	7.14381	7.78175	7.79909	7.98082	7.99839	8.7418	7.95774	8.0309	8.06917	8.2892	8.54833	7.54528	7.74562	8.25677	8.25723	8.11179	8.13184
UMPS	7.1736	7.1614	7.21399	7.18453	7.57623	7.51664	7.51999	8.15363	7.2478	7.26471	7.44241	7.21859	7.32524	7.52071	5.72912	6.59537	7.34849	7.16204	7.24816	8.09132	7.14696	7.57313	7.377	7.76903	7.27859	7.3371	7.41021	7.4109	7.48601	7.15211	7.16291	7.09162	7.59556	7.0809	7.45445	7.27297	7.24174	7.52833	7.43485	7.37202	7.35642	7.38506	7.61387	7.29391	7.16523	7.16348	7.30181	7.37384	7.28741
ULK3	8.14102	7.86606	7.97268	8.06985	8.0335	7.88934	8.20385	8.10106	8.43151	7.9328	8.03073	8.18152	8.33329	8.1093	8.13903	8.00138	7.96483	7.80317	7.79831	8.44013	8.20385	7.87741	8.15479	8.09333	8.04626	8.08784	8.28793	8.09382	7.87717	8.23418	8.06358	8.11336	8.0615	8.14533	8.46276	8.05687	8.19702	8.38876	8.25006	8.09611	8.25254	8.11205	8.22303	8.00937	8.23044	8.07044	8.38159	8.04378	8.31271
ULK2	6.63545	7.06567	7.75495	6.68014	6.19816	6.52205	6.61648	6.08336	7.00903	5.46857	6.50361	7.16532	6.96935	6.44693	6.55703	3.59965	6.54888	6.22358	6.7369	6.43101	6.84785	4.74526	6.08505	5.92001	6.19816	7.19483	5.89129	6.56229	6.45667	6.44348	6.57117	7.58319	5.79789	6.16075	7.11818	6.13686	6.8284	6.60751	6.30902	6.91651	6.8119	5.64629	6.89979	5.21132	6.26628	6.44348	7.36447	5.36027	6.71128
ULK1	11.0451	11.1675	10.672	11.0177	11.0953	10.5299	10.5208	9.94306	10.8956	10.8147	10.3341	10.8601	10.9644	10.4244	10.8214	11.2283	10.6669	10.6371	10.6518	10.8626	10.8678	10.0321	10.4019	9.94582	10.7239	11.0492	10.858	10.3747	10.5792	10.9337	10.4707	10.9787	10.3762	10.7405	11.04	10.5932	10.6946	10.4001	10.8812	10.991	10.7515	10.3281	10.8265	10.7578	10.8804	11.189	10.6741	10.6371	10.9479
ULBP2	4.81379	5.95633	5.33014	4.62722	5.85524	4.86719	5.61023	5.86771	4.45188	5.76986	5.42578	6.18908	5.13744	5.3007	5.58311	6.73566	5.25174	6.44512	5.66449	7.34071	6.52201	5.79866	5.99766	5.43072	5.05572	5.52332	5.96785	5.62904	5.64163	6.10298	5.93128	5.50701	6.38549	5.50427	6.17729	5.51792	5.63454	4.91738	4.82643	5.86721	5.32202	5.40036	6.16317	4.62538	5.82417	6.19024	5.95526	5.90803	5.59041
UIMC1	10.9511	11.1324	10.9327	11.1014	11.1467	10.6932	10.8488	11.0707	11.064	10.9501	10.7525	11.2632	10.8644	10.8936	11.0575	10.8244	11.0907	11.1538	11.037	10.651	11.0069	10.8548	10.8962	10.9771	11.0776	10.7794	11.1146	10.904	10.8323	11.004	11.1088	11.0964	11.3287	11.1	11.1558	11.0069	11.0108	10.7261	11.0694	11.2439	11.0069	11.1705	10.4377	11.0266	11.1014	11.273	11.0033	10.984	10.7733
UHRF2	7.82915	7.94499	7.54565	8.17551	7.86008	7.63811	7.328	7.93012	7.67254	7.64606	7.60462	7.87062	8.09869	7.58708	7.68606	8.04221	7.60973	7.66178	8.02478	7.22152	7.81587	7.8054	7.85718	7.45366	7.81122	7.43611	8.02822	7.7236	7.46972	7.77078	7.93435	8.298	8.25488	7.87782	8.17941	8.09293	8.01192	7.84344	8.24158	7.49602	7.7565	8.27585	6.48602	8.04729	7.84455	8.1135	7.7494	8.2722	7.47975
UHRF1BP1L	7.75316	7.77338	7.55624	8.01508	7.56016	7.63019	7.60595	7.61445	7.7484	7.99198	7.99505	7.82319	8.07749	7.82045	7.75466	8.26426	6.97232	7.69964	7.63019	7.19123	7.44297	7.63308	7.71854	7.95074	7.36472	7.24297	7.72341	7.4036	7.43042	7.49476	7.68315	7.81764	7.92523	7.73137	7.01348	7.90681	7.6945	7.58527	7.77768	7.43921	7.58527	7.87854	6.55469	7.88649	7.88533	7.97968	7.36734	7.54021	7.12182
UHRF1	6.3808	6.92776	6.49834	7.30182	6.79805	8.18792	7.92717	5.82687	6.45311	6.61944	6.38805	6.8115	7.31742	6.58845	6.48195	7.33171	6.82756	6.83635	6.92614	7.12461	5.19239	9.04012	7.80869	7.48443	7.16254	6.06365	5.65454	7.56288	7.30114	6.5128	6.14519	5.98094	6.53407	6.91039	7.0162	6.91452	6.50898	8.094	6.44599	6.72653	6.39313	7.34863	6.78253	7.36318	6.32536	6.27233	6.77545	6.88759	6.67592
UHMK1	7.03834	6.63643	6.52247	6.53517	6.80297	6.52905	7.17677	6.93801	6.86774	6.7898	7.22542	7.52574	6.69281	7.12294	6.2932	7.11739	6.70447	6.76666	6.96225	6.06509	6.96593	7.05417	6.75994	7.57642	6.54369	6.87156	6.90935	7.04285	7.16185	6.95742	6.51773	6.56805	7.26089	7.50702	6.90017	6.64457	6.97304	7.26767	6.85336	7.02107	7.25468	7.66191	6.75857	6.66559	6.54954	6.47742	6.90813	6.83742	6.7968
UGT8	4.51971	4.02293	4.74062	3.80404	5.17673	4.84549	5.39894	3.98227	3.86642	4.16996	4.50279	4.93972	5.43119	4.47655	4.08411	4.66475	4.73506	2.79056	4.30516	4.92296	4.68476	5.32726	4.5557	5.17434	4.75711	4.18267	3.35147	3.90607	4.81109	3.23726	4.62595	5.07646	4.19992	4.70799	3.30199	4.18677	4.18754	5.22625	4.71069	4.76625	3.68168	5.72501	4.52842	5.12084	3.87268	4.42857	4.35872	4.89372	4.56567
UGT2B7	4.12872	2.39641	7.00562	6.7244	5.41425	7.52534	5.87096	6.78378	5.63547	5.84835	6.43582	6.59017	2.3424	6.79635	5.23358	3.05051	5.31765	2.07602	4.9832	4.19698	6.80082	6.03769	5.84292	2.55631	6.75136	5.31166	5.82484	6.62279	5.52784	6.22193	2.63409	2.58881	5.74774	3.28727	2.35999	2.20277	5.18778	5.44555	7.34228	5.08154	6.96234	6.71968	2.72872	2.38841	4.9738	2.72371	3.40288	6.84961	6.20196
UGT2B4	3.28716	6.90601	4.58737	4.58629	5.54066	5.71307	5.62385	5.52062	4.90487	1.59757	6.12238	4.69662	5.12987	4.62953	5.2269	5.27714	5.48935	0.827207	4.59173	4.93448	6.10283	5.49964	0.920497	5.85589	5.20322	4.71623	5.65391	5.20082	6.68064	4.70983	5.01081	1.42631	5.2533	4.96419	4.6869	6.95399	5.51534	1.5387	4.52145	5.48935	3.86474	5.59198	5.2453	2.92611	6.19014	6.1383	4.18464	5.44372	2.03958
UGT2B11	2.42192	6.56485	5.56788	5.57665	5.36407	6.08229	5.17641	5.86786	4.81665	3.87692	5.90156	4.84855	3.75534	5.27183	4.90089	4.41934	5.13575	2.09342	4.08294	3.95907	5.96104	5.48334	4.29442	4.28141	5.69957	4.59946	6.02181	5.18054	5.92027	4.08746	3.56014	2.68462	4.98494	4.47532	3.83408	6.11244	5.53505	3.50879	5.4465	5.13128	5.69697	6.41606	5.09519	3.7781	5.06841	5.58798	2.40691	5.64309	4.48966
UGT2A3	2.68164	2.63239	2.58346	2.61962	2.50403	2.67812	2.7174	2.56203	2.62768	2.69639	2.63239	2.70778	2.6358	2.71185	2.67179	2.68474	2.58985	2.656	2.58434	2.58108	2.75768	2.5749	2.5464	2.71538	2.67434	2.66783	2.43448	2.56421	2.65477	2.58108	2.67908	2.71185	2.58169	2.60518	2.73784	3.73203	2.71877	2.71336	2.63898	2.68164	2.6805	2.70035	4.22632	2.58796	2.62674	2.61495	2.67908	2.60713	2.60303
UGT1A6	5.66786	3.27294	3.60286	1.91765	2.25336	2.05405	1.81746	1.99949	5.62019	4.7878	3.51261	2.09651	4.30465	3.89505	4.01082	3.51826	2.23589	3.56531	2.66793	8.53356	2.11051	4.11294	2.01669	3.66537	2.69551	4.07039	2.41104	2.30248	1.75742	2.19383	4.79747	2.08258	2.02259	3.63818	2.01504	5.37846	1.77692	2.12348	2.83076	2.75733	5.10996	3.09745	2.30029	7.83418	4.80452	2.43136	2.39863	3.10286	2.47154
UGP2	11.3088	11.4508	11.608	11.3034	11.2235	11.5589	11.7206	11.4536	11.2127	11.6265	11.6865	11.7451	11.4152	11.6947	11.5053	11.5056	11.6684	11.7992	11.7226	11.5913	11.6765	11.5628	11.7799	11.6458	11.5687	11.4483	11.8745	11.664	11.5861	11.6154	11.5633	11.9497	11.6578	11.4778	11.3522	11.6426	11.6856	11.6856	11.4085	11.6659	11.424	11.5777	11.0353	11.595	11.5388	11.5188	11.6174	11.7019	11.3933
UGCG	9.80055	9.45625	9.37161	9.60705	10.4654	9.70432	9.70567	11.5599	9.50664	10.511	9.25848	9.40132	10.0722	9.49911	9.35974	11.4549	9.01271	9.72933	9.28215	9.0426	8.66201	10.1668	9.50065	11.4283	9.25685	9.01001	8.91816	9.01104	9.09873	9.18262	9.52442	10.2313	11.1521	9.97896	9.22197	9.97733	9.39608	9.25485	9.64614	9.07073	9.73694	10.0414	9.3951	10.9675	9.56413	10.36	9.24687	9.35924	9.33816
UFSP2	10.2907	10.8417	10.3708	10.8081	10.3823	10.8447	10.2618	10.0674	10.4711	10.5961	10.6659	10.5021	10.4619	10.5616	10.5035	10.2439	10.8999	10.3941	10.5042	10.2919	10.305	10.376	10.6006	10.4406	10.684	10.3009	10.6051	10.6095	10.5119	10.5383	10.4211	11.0515	10.5174	10.7644	10.5005	10.5961	10.3678	10.4123	10.404	10.6659	10.5788	10.8468	10.5312	9.99051	10.6812	10.6868	10.4445	10.488	10.4717
UFM1	8.05318	9.06697	8.99819	9.25513	9.61815	9.59734	9.09149	9.28817	8.15543	9.25891	9.27798	9.40619	9.30139	9.36494	9.25955	9.38124	9.08242	9.21809	9.08593	8.22424	8.67559	8.66676	8.96029	9.97967	9.04624	8.77457	9.14661	9.70599	9.26725	9.29801	9.3069	9.59179	10.0015	9.18819	9.15496	9.6404	9.3607	8.69599	8.65477	9.10256	9.0351	9.81005	7.37677	9.07022	9.21361	9.3437	8.79638	9.13107	8.93506
UFD1L	7.50449	7.94368	7.83466	7.61994	7.97756	8.3785	8.25049	7.74628	7.66067	7.93493	8.23173	8.14489	7.96577	8.15834	7.908	7.67207	8.36536	8.21416	8.20485	8.33984	7.9373	8.13631	8.2159	8.43091	7.98789	8.18673	8.04818	8.26571	8.21823	8.06501	7.96106	7.96176	7.99402	7.75897	8.16236	7.77778	8.00492	8.56216	7.87049	8.24134	7.97531	7.87834	8.43385	8.04503	7.93226	8.01929	8.06966	8.29822	8.09655
UFC1	12.0094	10.8736	11.2487	10.9877	10.6893	10.7556	10.8523	10.7521	11.1964	10.829	11.1237	10.8305	11.1135	11.123	11.0142	10.584	10.835	10.7584	10.9069	10.7974	10.7484	11.1624	10.9243	10.9219	11.1949	10.9671	10.8899	11.0471	11.0427	10.6628	11.3611	10.7659	10.5936	11.2744	10.6129	11.1223	10.9668	11.0014	11.1349	10.7224	11.2697	11.3723	11.067	11.6664	11.0746	10.7946	10.9	10.9197	10.8571
UEVLD	6.21562	4.66245	5.70795	5.36213	5.57623	6.60775	5.96002	5.93084	3.72768	5.30942	6.40183	6.33214	5.67811	6.56428	5.5746	4.83162	5.05711	5.94942	6.81087	4.74501	5.95858	5.14867	5.39441	6.4232	5.25257	5.87361	6.19501	6.62671	5.52067	5.46668	5.98303	6.12726	6.16666	5.72198	6.25578	5.7022	5.88965	5.98621	5.59669	5.45713	5.49568	6.13581	4.78495	5.32901	5.33697	5.67348	5.92093	5.83703	6.36938
UCP3	5.10477	6.48276	7.38507	6.08925	7.12021	7.16764	7.60071	6.60321	6.15684	6.92576	6.1294	6.09931	6.20311	6.18466	6.65811	6.48329	7.53716	6.54575	6.29863	6.89996	6.22935	6.34448	6.82687	5.72676	6.23384	7.41546	6.37895	6.09133	6.40867	6.6102	6.66927	6.7285	5.63841	5.61197	6.75967	5.48023	5.84999	6.96435	7.1007	6.87551	5.12645	4.83705	7.50334	6.85197	6.57121	6.69833	6.62905	6.16822	6.98516
UCP2	9.26075	8.18591	9.7501	9.21218	9.02899	8.62086	10.1082	8.94423	9.12187	9.3063	9.71483	9.30229	9.73348	9.77341	9.26839	9.60473	9.43213	9.86106	9.01641	9.7638	9.50392	10.3011	9.72282	9.30683	9.76556	9.66092	9.22023	8.64239	9.23077	9.79475	10.1613	8.77465	8.47857	9.70489	8.66035	8.50022	9.49839	10.8484	9.74277	9.69316	9.0839	8.95433	10.5548	10.8181	9.46831	9.78421	9.54483	10.1906	9.37282
UCP1	2.62388	2.52722	2.42306	2.50128	2.43107	2.89357	3.59479	2.53175	2.67224	2.65266	2.47732	3.19614	2.59159	2.62926	2.58502	2.66187	2.60051	2.69865	2.53046	2.40976	2.89613	2.49562	2.93191	2.66989	2.49243	2.62747	4.71436	2.42648	2.75153	2.61525	2.60414	4.52843	4.58748	2.47276	2.70087	2.53046	2.54765	2.61954	2.53518	2.67423	2.65444	2.62155	2.60594	2.55042	2.49562	2.47484	2.58321	4.59447	4.44853
UCKL1	9.53799	9.19636	9.43843	9.1078	9.91664	9.46328	9.61236	9.55768	9.43452	9.5162	9.71468	9.77237	9.29203	9.44599	9.55768	9.69758	9.54894	9.72467	9.62899	9.6963	9.66466	9.15586	9.43729	9.56471	9.69194	9.83939	9.87949	9.50159	9.54479	9.77642	9.24146	9.61052	9.59748	9.5162	9.67656	9.37378	9.66412	9.64562	9.41966	9.68349	9.66281	9.39864	10.0223	9.45904	9.58014	9.92365	9.71002	9.89866	9.77642
UCK2	6.95212	7.99341	6.60016	7.66464	8.33538	8.3232	7.42825	9.32191	7.38004	7.43161	6.97826	7.3903	8.4799	6.84464	7.1401	8.2905	7.67359	7.05498	7.21324	7.88052	6.74557	8.43258	7.5137	9.00177	7.43884	7.27924	6.84635	7.49826	7.39988	7.44157	7.00405	8.42879	9.16965	6.89698	7.81817	7.74279	7.19536	7.79081	7.74419	7.70998	7.25507	7.76641	7.8493	8.95107	6.85245	7.2935	6.91465	7.59835	7.20193
UCK1	7.71071	7.44755	7.62431	7.60959	7.43626	7.77113	7.47482	7.76629	7.64474	7.24538	7.78449	7.62431	7.35535	7.41695	7.58551	7.46266	7.77143	7.70225	7.68365	7.56218	7.96545	7.54802	7.58872	7.39369	7.6214	8.00873	7.80808	7.64933	7.70991	7.82782	7.58492	7.59019	7.44358	7.4777	7.52383	7.38767	7.41643	7.77143	7.46385	7.75203	7.62991	7.70169	8.04723	7.22657	7.54433	7.37601	7.64982	7.72335	7.87032
UCHL5	7.44309	8.19598	7.94927	7.69228	8.33046	8.54126	8.25336	7.81317	7.7956	8.19949	8.30004	8.38088	8.25967	8.44076	7.72298	8.06148	7.92531	8.41998	8.36426	7.71567	7.82111	8.58971	8.14921	8.65572	7.80394	7.84894	8.06568	8.28616	7.90769	8.0843	7.83885	8.17996	8.51304	8.31797	8.04533	8.16255	8.32641	8.07589	7.94057	8.09681	7.8771	8.25144	7.13873	8.04829	7.96307	8.24423	7.8927	8.07024	7.67071
UCHL3	9.34419	9.67319	9.62144	9.60055	9.8234	10.1838	9.9907	10.0797	9.54824	9.80924	9.85022	9.46079	10.0915	9.98092	9.57071	9.57373	9.68907	9.57645	9.54824	9.9236	9.34344	10.6485	10.0677	10.3211	9.68426	9.43354	9.52831	9.94834	9.67547	9.33166	9.69697	9.57593	9.99716	9.53179	9.365	9.87876	9.51638	9.96432	9.74482	9.52197	9.62776	10.0103	9.38201	10.1838	9.42611	9.56047	9.6401	9.58081	9.34295
UCHL1	8.25103	10.0274	9.18575	9.80449	8.54843	10.362	8.36369	8.88703	8.84464	8.58774	8.9697	8.15494	10.8183	10.17	8.9561	8.8752	9.80379	8.80805	9.11088	9.15402	8.60157	10.3709	10.2843	9.32274	9.56391	8.42306	7.67767	8.08133	9.53311	9.10905	7.53685	9.88106	8.28819	8.26238	7.63469	9.17473	8.51139	9.23788	8.01145	9.60681	9.02436	9.12172	10.0053	9.06505	8.5221	9.16163	8.69324	9.40036	8.91602
UCA1	4.08551	4.93843	4.74059	5.04631	4.96408	4.94473	4.62745	5.16116	5.18877	4.03992	4.6184	5.63037	4.52063	4.94473	5.1113	5.86207	5.09129	4.20324	3.36817	5.93297	4.01974	5.13822	4.87295	4.48561	3.91892	4.60986	3.98034	5.38436	5.4744	5.56749	4.76703	4.65228	5.62694	3.47983	4.96774	4.54521	4.77514	4.32986	4.47213	5.37589	3.7725	5.3312	4.90886	5.25165	4.89932	6.33582	4.95728	3.91136	5.48543
UBXN8	7.55883	8.28284	8.12444	8.17879	8.33543	8.83823	8.3159	8.30944	8.35468	8.07646	8.32996	8.20235	8.39851	8.59126	8.23988	7.66458	8.57563	8.27087	8.37311	8.45549	8.10202	9.09644	8.58322	8.48152	8.24931	8.10709	8.29045	8.51621	8.39053	8.2966	8.10132	8.49817	7.99824	7.80846	8.38707	8.48061	8.19868	8.33818	8.15583	8.462	8.04021	8.284	7.94744	7.77637	8.2183	8.11442	8.08774	8.2938	8.13455
UBXN7	5.04019	5.3748	5.59238	5.15492	5.70899	5.53493	5.81363	5.20152	5.19985	5.34138	5.6139	6.0963	5.5008	5.67366	5.40732	5.10971	5.62024	5.93418	5.73965	5.7228	5.73556	4.42227	5.43039	5.51952	5.42994	5.87049	5.79381	5.32812	5.47484	5.88329	5.52995	5.80037	5.69359	5.46773	5.96332	5.11356	5.72927	4.86896	5.72525	5.8144	5.3129	5.75674	5.39086	5.204	5.60537	5.07535	5.71193	5.6139	6.12509
UBXN6	10.3714	9.90838	10.2411	10.2986	10.0989	10.4862	10.1848	9.86258	10.3697	9.99285	10.3122	10.1317	10.1905	10.0165	10.1841	10.1415	10.404	10.2018	10.1195	10.5125	10.6616	10.0035	10.1135	9.88279	10.3039	10.4227	10.1941	10.1202	10.2829	10.3057	10.3125	10.3357	9.65677	10.0337	10.1823	10.2012	10.0864	10.5258	10.4637	10.3288	10.2504	10.1816	10.912	10.1887	10.3181	9.93477	10.3337	10.0502	10.3401
UBXN4	10.1071	10.3102	10.2747	10.6901	10.4941	10.7176	10.2357	10.3304	10.3141	10.4309	10.4935	10.3041	10.588	10.4485	10.213	10.4491	10.0368	10.5665	10.4841	10.1956	10.1619	10.1305	10.3709	10.6421	10.0761	9.8187	10.5087	10.4841	10.2864	10.4463	10.3459	10.5453	10.6748	10.676	10.2553	10.7048	10.3651	10.3282	10.4947	10.2814	10.2853	10.7803	9.28566	10.6142	10.4835	10.438	10.1862	10.3636	9.98705
UBXN2B	6.97704	7.78493	8.71482	8.03144	8.53185	8.46359	8.38801	8.4179	7.53069	8.19077	8.55748	8.43349	7.99122	8.83373	8.07025	8.09546	8.28243	8.28357	8.05692	7.86755	8.22311	8.34492	8.2883	8.31264	8.1197	8.32963	8.51033	8.46443	8.36924	7.82815	8.19703	7.49518	8.35209	8.08144	8.61638	7.92174	8.37943	8.36758	8.93974	8.54433	7.55661	7.97643	7.66729	8.01546	8.0173	8.16246	8.3761	8.03692	8.26578
UBXN2A	7.53413	8.12152	8.37308	7.93598	8.27953	8.36358	8.25851	8.41263	7.98385	8.50275	8.92421	8.50275	8.66563	8.1981	8.42958	8.43921	8.30615	8.6739	8.45484	8.42007	8.30322	8.06375	8.27718	8.26777	7.69745	7.93706	8.65531	7.92921	7.62815	8.6547	8.32392	8.58474	8.51732	8.26404	8.50341	8.67673	8.44677	7.92285	8.45568	8.1891	8.57595	8.46818	8.19018	8.14191	8.50632	8.28073	7.96232	7.77618	8.43365
UBXN11	9.14189	7.4602	8.38198	8.29691	8.2949	6.86887	7.87789	7.44821	8.04096	7.62135	8.00319	7.32088	8.07176	8.41289	8.00471	7.38862	7.43316	7.71678	7.63522	7.36135	7.70784	7.6966	7.68765	7.88357	8.10128	7.76559	7.92906	8.08704	7.69371	7.31282	8.74974	7.42386	7.81181	8.28207	7.85159	8.0404	7.77077	8.24709	8.27457	7.23311	8.37987	7.62443	7.84869	8.41926	8.2099	7.81217	8.16214	7.76584	7.48924
UBXN10	9.1763	3.4886	6.66566	5.79552	4.19896	3.71616	2.47606	4.86208	6.37563	4.3713	4.06314	3.00003	3.34251	4.22213	6.35161	2.61374	3.74802	4.81063	3.74466	5.03478	4.41978	5.44374	4.40499	3.67404	6.50945	5.31398	4.63676	4.96309	2.90817	4.29781	7.50647	2.58922	5.00235	7.12755	3.78637	4.82265	4.21915	5.37402	4.3969	2.24007	6.36972	3.49699	3.53389	7.48147	6.81335	3.63276	4.0717	3.32329	4.03524
UBXN1	12.8438	12.651	12.988	12.6469	12.7141	12.5995	12.764	12.4292	12.9053	12.5995	12.7512	12.7821	12.7866	12.7438	12.6599	12.4498	13.1044	12.6807	12.9291	12.9053	12.9053	12.1605	12.7256	12.4809	12.7866	12.8667	12.8996	12.6897	13.0141	12.9752	12.8747	12.8799	12.4702	12.635	12.9336	12.764	12.9197	12.8581	12.9456	12.9456	12.7908	12.9143	12.9291	12.6545	12.8996	12.8397	13.0587	12.7178	12.9197
UBTF	7.83027	8.12618	7.42049	7.85036	7.57803	7.24324	7.65102	7.61237	8.04242	7.72697	7.68578	7.95576	7.56012	7.79769	7.82531	7.45503	7.51139	7.71989	7.40939	7.63789	7.81144	7.80252	7.87044	7.67811	7.64369	7.81465	7.59496	7.58565	7.86431	7.68838	7.84576	8.22837	7.35459	7.23115	8.3588	7.85236	7.853	8.11809	7.90556	7.77037	8.31033	8.06717	8.16953	7.20046	7.54161	7.83972	7.7431	7.74249	7.85514
UBR7	9.92372	9.89889	9.91368	9.6483	9.75013	10.04	9.80139	9.92472	9.70602	9.86357	9.71244	9.7199	9.60713	9.65107	9.87159	9.66512	10.0254	9.84345	9.82473	9.89319	9.99619	9.99511	9.96901	9.71588	9.76436	9.7631	9.91171	9.53798	9.51349	10.0369	9.7998	9.80959	9.95428	9.73265	9.94839	9.69781	9.92657	10.1567	9.93825	9.84127	9.99393	9.62402	10.1691	9.70257	9.85544	9.80561	9.98841	9.94113	9.94172
UBR5	8.18732	8.66876	8.43524	8.67478	8.49117	8.6759	8.16062	8.26078	8.36925	8.22915	8.67674	8.623	8.83241	8.6759	8.35308	8.95963	8.41677	8.45076	8.57154	8.04541	7.95917	8.15505	8.34681	8.88313	8.39137	7.99372	8.35947	8.73093	8.41552	8.38353	8.31008	8.97277	9.44961	8.86959	8.50028	8.62887	8.49055	8.26078	8.51915	8.46695	8.38754	9.0078	7.6563	8.73288	8.34193	8.38496	8.31517	8.62141	8.39314
UBR3	6.82825	7.9515	8.20576	7.80403	8.08216	8.56469	8.10023	7.50147	6.76287	8.13148	7.80957	8.2857	7.81992	8.20576	7.98126	7.6816	8.3927	8.16816	8.51313	7.93151	7.68561	7.66317	7.86334	8.26559	7.99197	7.85455	7.97853	8.3998	8.10832	8.05897	7.64219	8.40986	8.33058	7.89035	8.47182	8.1441	8.2145	7.36801	7.87217	8.48645	7.2645	8.05897	7.05819	7.77391	7.99618	8.17558	7.89811	8.32672	7.63988
UBR2	9.19158	9.55172	9.39528	9.41413	9.22325	9.35908	9.51647	9.25504	9.51071	9.53893	9.3922	9.69179	9.72285	9.34622	9.39065	9.4794	9.48497	9.42306	9.61099	9.58234	9.32401	9.28897	9.41161	9.30576	9.28897	9.16856	9.54763	9.25625	9.37216	9.38444	9.48626	9.46735	9.30678	9.56141	9.27482	9.56472	9.39694	9.65292	9.62595	9.54164	9.03876	9.4493	9.42598	9.53347	9.35795	9.65112	9.42418	9.43125	9.28143
UBR1	8.08482	8.25299	8.33562	8.08663	8.61145	8.37108	8.30387	8.40812	8.21727	8.44493	8.17337	8.18284	8.23169	8.3325	8.2622	8.28752	8.24567	8.28392	8.27461	8.17337	8.13777	8.52104	8.30258	8.52939	8.14837	8.03551	8.17964	8.25762	8.39384	8.24229	8.23228	8.13245	8.64714	8.25166	8.12098	8.09623	8.26173	8.05273	8.40744	8.25166	7.97973	8.15385	7.42439	8.29382	8.2285	7.98229	8.1721	8.1721	8.02947
UBQLNL	6.61808	7.12186	6.55238	6.19021	6.85538	6.53751	6.20856	5.75034	6.32875	7.14091	6.10257	7.00471	6.12334	6.26617	6.19154	6.12443	6.83313	6.84005	7.00826	6.12443	6.45042	5.87896	6.37224	6.44771	7.15959	7.16698	6.98108	6.76641	7.10092	6.91839	6.74553	7.04402	6.63594	6.09657	7.03664	7.09634	6.58525	5.89481	6.23338	6.58227	7.02783	6.03971	6.51326	5.76653	7.06898	6.3322	6.7865	6.98444	6.80374
UBQLN3	3.40121	3.28236	3.96916	3.30833	5.37287	4.18866	7.57516	4.71532	3.41215	4.6434	3.96486	5.22832	3.28236	4.47073	3.89872	4.52667	5.36577	5.26378	3.28823	3.73932	3.41035	3.43024	4.74228	4.88685	4.98922	5.1301	3.50201	3.89091	5.42193	3.38522	3.42913	5.10585	3.94623	3.87736	5.27279	4.35742	3.84083	3.76531	4.05067	4.96347	3.66224	3.41605	4.89865	4.1482	4.26721	4.72463	4.85928	4.91292	5.50476
UBQLN2	10.1269	10.2075	10.3265	10.1008	10.2188	9.93715	10.1859	10.5547	10.0451	10.2405	10.2763	10.1698	10.1807	10.2148	10.2115	10.2915	10.1383	10.1479	9.91083	10.2468	10.2442	9.95035	10.2985	10.1807	10.0248	10.198	10.2474	9.95269	10.0807	10.2581	10.1488	10.1726	10.1049	10.1641	10.1006	10.2102	10.2053	10.2359	10.3575	10.1829	10.1147	10.0192	10.1745	9.94213	10.1793	10.1856	10.169	9.97983	10.1414
UBQLN1	8.12249	8.0385	7.8897	8.37275	8.83384	8.33507	8.09845	9.16062	8.34758	8.61629	8.90114	8.67531	8.5462	8.5954	9.06046	8.68976	8.27182	8.55069	8.06529	7.90649	8.68859	8.07197	8.56465	8.83276	7.46988	8.39889	8.23861	8.47934	8.07863	7.95002	8.4711	8.80584	9.01073	8.72446	8.47566	8.46858	8.48612	8.38105	8.5969	8.32631	8.28393	8.3396	7.81367	8.1802	8.12118	7.93958	8.39138	7.62184	8.36878
UBP1	10.5282	10.8567	11.0331	10.8236	10.8718	10.8432	11.0014	10.9674	10.6514	10.9604	10.4656	11.0033	10.8638	10.9297	10.858	10.6161	11.0021	10.9622	10.9597	10.7473	10.8841	11.0061	10.9425	11.1446	10.8594	11.2363	10.9968	11.2489	11.0979	10.88	10.9854	10.5696	10.9909	10.6877	11.0642	10.8664	10.9932	10.95	11.0172	11.0899	10.8931	10.946	10.753	10.7099	10.8121	10.8743	11.0646	10.9768	11.1102
UBOX5	7.0999	6.79946	6.59616	6.74669	6.94868	6.75322	6.46752	6.89187	6.81492	6.6523	6.73207	7.25477	6.5087	6.64217	6.53884	6.43634	7.1905	6.75378	7.15227	7.05936	7.09897	6.63045	6.48695	6.85554	6.89471	7.12904	7.04873	7.03282	7.21553	6.73434	6.97923	7.03963	7.20784	6.52571	7.04135	6.95349	6.91744	7.04687	6.77637	7.19651	7.22914	7.05754	7.29838	6.61881	6.77689	7.00552	7.10382	7.19896	7.16465
UBN1	10.4879	10.3397	10.382	10.5183	10.394	9.9025	10.3404	10.7211	10.5505	10.3305	10.4796	10.4281	10.3411	10.3753	10.5136	10.4428	10.0557	10.2863	10.1382	10.296	10.5782	10.1701	10.4949	10.2159	10.2613	10.5867	10.3909	10.2263	10.3147	10.3168	10.3713	10.4837	10.1235	10.2941	10.4735	10.1462	10.4132	10.5643	10.5767	10.3823	10.4226	10.1743	10.7121	10.2675	10.1906	10.5703	10.3753	10.2806	10.5198
UBL7	8.06346	7.70683	8.22007	7.61082	7.70077	8.33333	8.15826	7.88194	8.13686	7.87356	8.26005	8.12968	7.77009	8.15258	7.62796	8.14854	8.29065	8.00763	8.1193	8.16532	8.47966	8.17094	8.07255	7.78239	8.26313	8.38882	8.14969	8.10319	8.18013	8.0384	7.9403	7.93336	7.60726	7.61021	7.86019	7.75693	8.03188	8.90935	8.32576	8.25377	8.0693	7.98714	8.87267	7.77408	7.81451	7.92619	8.459	8.29511	8.37041
UBL5	12.4912	12.1824	12.5768	12.1301	12.2728	12.5572	12.5008	12.252	12.2978	12.3319	12.4689	12.4616	12.4637	12.6379	12.2835	12.0788	12.5656	12.3782	12.7042	12.6656	12.4539	12.6756	12.5113	12.4409	12.584	12.4357	12.3594	12.5856	12.7458	12.2638	12.3594	12.1498	12.3233	12.3503	12.3878	12.5061	12.4436	12.5951	12.4765	12.2661	12.4589	12.7228	12.536	12.316	12.3524	12.3524	12.4959	12.6113	12.3233
UBL4B	2.8465	3.84879	2.76946	2.95882	3.4089	2.40489	3.04002	4.81596	3.31536	3.2907	3.20661	3.16288	3.54144	3.43267	2.92356	3.26622	3.72887	2.55955	3.06911	2.23031	2.70369	3.7727	3.76329	2.8514	3.40355	3.70134	4.86969	3.30743	3.46435	1.59701	4.42049	5.52955	3.06045	2.66455	1.58322	2.92917	2.47885	3.5645	2.57007	3.31536	2.79765	3.40355	3.95245	2.74773	1.6251	3.55635	3.91419	4.22864	2.33778
[truncated: 11,688 more rows]
[truncated: 28 more columns]

## Sheet: DEGs of COPD
geneNames	logFC	AveExpr	t	P.Value	adj.P.Val	B
AASS	-0.503938	7.31158	-2.51566	0.0139465	0.545853	-2.97624
ABCB1	0.694974	7.10298	2.19129	0.0314309	0.598697	-3.52514
[truncated: 242 more rows]
