# Supplementary material for: Identification and validation of genetic signature associated with aging in chronic obstructive pulmonary disease
Source: Aging (Albany NY). 2022 Oct 28;14(20):8568–80. doi: 10.18632/aging.204358 (PMC9648797; doi:10.18632/aging.204358)
Supplement: Supplementary File 2 [file aging-14-204358-s002.xlsx]

## Sheet: Samples
Supplementary File 2. Sample, the baseline characteristics of included human samples. gene Matrix, gene expression in GSE125521. DEGs of COPD, different expressed genes of aged and young COPD mice.
Sample	Group	Sex	Age	Age_Group
GSM3576333	COPD	Female	4 months	Young
GSM3576334	COPD	Female	4 months	Young
GSM3576335	COPD	Female	4 months	Young
GSM3576351	COPD	Female	15 months	Aged
GSM3576352	COPD	Female	15 months	Aged
GSM3576353	COPD	Female	15 months	Aged

## Sheet: gene Matrix
geneNames	GSM3576333	GSM3576334	GSM3576335	GSM3576351	GSM3576352	GSM3576353
Zzz3	22	24	23	30	36	30
Zyx	2759	3387	3304	1749	2095	1900
Zyg11b	21	20	19	24	17	16
Zxda	103	74	80	67	101	123
Zw10	101	111	105	108	94	106
Zswim5	36	30	37	35	35	41
Zswim4	73	82	76	58	66	61
Zswim3	37	48	46	39	49	45
Zswim2	16	23	21	16	15	17
Zswim1	82	95	78	69	82	77
Zscan21	52	49	37	42	61	50
Zscan2	19	19	19	19	17	18
Zscan10	17	14	12	19	14	15
Zrf2	103	123	92	100	99	89
Zranb3	380	319	324	341	349	414
Zranb2	660	643	607	912	746	808
Zranb1	79	71	75	80	78	66
Zpbp	20	17	16	19	20	19
Zp3r	12	12	16	10	15	14
Zp3	17	22	22	23	17	22
Zp2	18	15	13	13	14	18
Zp1	20	16	19	17	17	20
Znrf4	15	21	14	19	17	18
Znrf3	17	16	15	14	12	12
Znrf1	28	30	29	22	20	19
Znrd1	853	930	883	1179	1102	1158
Znhit4	108	129	117	119	130	116
Znhit3	110	95	122	183	144	186
Znhit2	131	140	150	142	150	156
Zmynd19	20	25	24	19	19	15
Zmynd15	71	62	73	79	62	66
Zmynd12	41	49	47	57	52	59
Zmynd11	235	224	248	223	222	199
Zmynd10	47	55	46	51	62	63
Zmym1	12	11	14	16	16	15
Zmpste24	405	319	358	326	349	343
Zmiz1	30	21	27	19	24	18
Zmat2	20	23	19	24	18	22
Zkscan2	18	22	19	16	20	17
Zkscan17	38	48	48	39	47	40
Zkscan1	87	57	77	77	104	88
Zipro1	41	38	47	35	36	42
Zim1	12	13	14	13	11	14
Zik1	11	13	11	11	14	13
Zic5	11	13	15	12	10	20
Zic4	12	14	10	10	10	12
Zic3	19	19	20	19	25	21
Zic2	12	16	14	15	13	15
Zic1	13	17	17	18	23	14
Zhx3	52	55	49	42	65	36
Zhx2	48	41	46	32	39	43
Zhx1	133	124	109	142	128	140
Zgpat	62	61	53	56	64	55
Zfyve9	16	15	18	18	17	18
Zfyve27	55	56	53	51	53	55
Zfyve26	142	152	135	87	116	116
Zfyve21	1507	1368	1372	1473	1478	1377
Zfyve20	103	100	96	83	93	90
Zfyve19	31	26	32	34	33	30
Zfyve16	76	53	53	56	61	64
Zfyve1	45	43	33	44	41	34
Zfy2	17	16	17	17	15	17
Zfy1	10	26	19	16	18	16
Zfx	263	296	273	303	344	327
Zfr	22	22	22	24	26	26
Zfpn1a4	18	18	17	17	17	16
Zfpn1a2	19	14	15	11	19	19
Zfpm2	54	44	45	39	48	43
Zfpm1	337	352	360	187	238	189
Zfpl1	52	60	47	56	64	56
Zfp99	134	146	130	129	131	123
Zfp98	23	28	21	16	24	24
Zfp97	78	66	65	115	91	109
Zfp96	140	154	160	135	141	147
Zfp94	57	62	61	58	55	52
Zfp93	29	31	20	24	20	26
Zfp92	20	14	17	19	18	21
Zfp91	101	90	90	97	78	72
Zfp90	68	65	68	74	80	74
Zfp9	15	19	17	20	16	19
Zfp87	99	118	109	99	113	110
Zfp85-rs1	24	30	24	30	30	30
Zfp84	12	11	9	8	17	13
Zfp82	32	33	28	31	38	35
Zfp817	30	24	30	31	27	30
Zfp787	38	40	45	37	51	53
Zfp786	28	21	22	25	18	17
Zfp784	17	21	17	12	15	15
Zfp780b	17	22	17	20	19	20
Zfp78	21	24	22	25	31	22
Zfp777	18	12	20	23	25	17
Zfp771	56	66	53	60	70	65
Zfp764	16	28	17	22	20	21
Zfp760	44	36	35	34	43	46
Zfp758	42	47	46	56	49	55
Zfp75	127	102	95	120	118	122
Zfp748	54	60	69	63	61	69
Zfp74	28	32	23	19	23	21
Zfp72	18	23	16	20	20	18
Zfp715	88	85	78	100	115	100
Zfp711	15	14	11	9	10	11
Zfp71-rs1	24	25	27	34	24	29
Zfp709	35	31	40	32	37	36
Zfp7	16	13	12	16	18	15
Zfp692	38	41	40	50	58	59
Zfp691	59	51	61	58	62	45
Zfp69	26	27	23	27	27	21
Zfp68	129	124	122	98	123	126
Zfp67	26	21	32	25	27	27
Zfp667	31	33	31	29	35	27
Zfp661	33	30	31	35	32	32
Zfp652	12	21	17	18	19	18
Zfp647	23	23	20	22	20	20
Zfp646	29	26	30	19	26	25
Zfp64	103	122	134	86	95	93
Zfp639	293	287	245	313	274	311
Zfp637	236	270	263	236	219	216
Zfp629	47	42	45	41	46	49
Zfp622	21	25	24	27	29	26
Zfp62	43	28	27	37	38	34
Zfp617	21	26	29	33	23	30
Zfp612	26	23	24	23	21	24
Zfp61	22	19	21	20	25	20
Zfp609	28	36	29	33	26	40
Zfp608	340	339	298	308	341	273
Zfp606	27	19	26	33	29	27
Zfp60	54	46	49	42	52	50
Zfp598	38	36	36	34	32	32
Zfp597	168	149	144	170	183	183
Zfp592	86	112	101	62	81	78
Zfp59	13	14	9	13	17	11
Zfp583	20	24	27	31	29	26
Zfp575	19	16	17	18	20	20
Zfp574	184	234	234	112	148	135
Zfp57	23	18	22	20	23	21
Zfp568	19	9	11	10	15	13
Zfp566	35	38	31	43	40	37
Zfp560	25	19	26	28	29	28
Zfp553	31	34	36	29	29	34
Zfp551	31	24	26	20	21	24
Zfp54	21	22	19	25	24	18
Zfp537	99	102	104	108	112	107
Zfp536	18	15	16	21	16	17
Zfp535	163	170	173	153	185	148
Zfp533	31	35	32	37	29	36
Zfp532	114	123	126	95	99	95
Zfp53	15	16	12	19	15	11
Zfp526	24	20	26	19	23	17
Zfp524	92	85	108	96	100	95
Zfp523	418	401	419	359	412	374
Zfp521	118	95	100	76	70	78
Zfp52	20	15	20	29	31	29
Zfp513	75	85	92	100	87	82
Zfp512	107	131	115	107	123	116
Zfp51	17	16	16	15	13	12
Zfp503	15	17	15	12	15	15
Zfp488	15	21	11	16	14	19
Zfp482	21	19	21	16	17	21
Zfp474	25	27	21	21	30	27
Zfp473	15	22	14	15	18	17
Zfp472	77	71	93	87	79	102
Zfp469	23	23	22	24	24	21
Zfp467	62	65	80	52	64	47
Zfp462	13	12	18	20	16	16
Zfp46	280	350	305	193	243	219
Zfp459	24	17	17	18	24	26
Zfp458	22	22	14	21	17	15
Zfp457	24	22	24	35	21	26
Zfp455	17	15	17	17	11	14
Zfp454	26	20	23	31	24	26
Zfp451	71	56	66	58	71	66
Zfp449	38	30	33	33	38	35
Zfp446	43	42	37	40	43	38
Zfp445	12	19	21	13	19	20
Zfp428	25	24	31	29	39	29
Zfp426	12	18	5	15	15	12
Zfp423	20	20	20	20	17	22
Zfp422	20	20	15	16	18	16
Zfp42	26	24	23	28	25	28
Zfp410	28	41	33	39	36	41
Zfp41	58	59	72	58	51	46
Zfp40	14	14	12	11	12	9
Zfp398	30	27	27	25	32	29
Zfp397	38	27	29	42	36	34
Zfp395	15	20	21	20	19	19
Zfp393	13	20	19	21	9	18
Zfp39	98	90	77	93	88	80
Zfp386	44	39	38	67	29	42
Zfp385	27	18	26	21	25	27
Zfp382	20	18	19	19	13	18
Zfp371	16	17	16	17	15	9
Zfp37	80	68	72	76	74	82
Zfp36l3	20	22	15	19	23	19
Zfp36l2	22	15	28	18	17	24
Zfp36l1	3916	4064	3709	2579	3078	2700
Zfp369	22	21	20	25	20	16
Zfp367	68	69	56	87	65	64
Zfp366	18	19	20	20	23	32
Zfp365	61	63	53	79	52	59
Zfp364	20	24	19	17	16	20
Zfp36	777	888	775	543	589	665
Zfp354c	17	14	13	19	13	12
Zfp354b	14	18	18	21	16	16
Zfp354a	31	27	30	29	26	32
Zfp353	12	10	11	9	15	11
Zfp352	11	17	17	14	16	17
Zfp35	40	43	36	24	31	36
Zfp346	75	85	64	79	77	77
Zfp339	23	24	24	22	21	30
Zfp334	46	40	47	37	39	45
Zfp330	425	378	353	424	365	414
Zfp326	154	131	156	162	158	163
Zfp322a	23	22	21	27	27	22
Zfp319	14	13	15	19	14	17
Zfp318	117	95	103	76	82	89
Zfp316	26	26	22	28	26	30
Zfp313	94	140	113	108	98	98
Zfp31	21	19	16	21	14	21
Zfp307	68	56	53	42	55	64
Zfp30	56	51	51	57	51	38
Zfp297b	28	28	29	25	26	25
Zfp297	203	200	189	156	188	183
Zfp296	26	28	30	25	36	36
Zfp295	94	75	81	83	102	94
Zfp292	115	100	88	109	108	100
Zfp291	55	49	40	53	53	40
Zfp289	215	208	160	200	179	175
Zfp288	24	26	26	23	25	21
Zfp287	20	19	19	20	19	19
Zfp286	21	24	14	23	20	17
Zfp282	150	165	163	117	148	131
Zfp281	101	88	94	112	104	110
Zfp28	13	25	17	13	17	18
Zfp277	378	318	397	409	305	372
Zfp276	45	49	60	47	41	47
Zfp275	73	80	80	67	81	71
Zfp27	50	49	39	44	58	43
Zfp263	276	285	267	248	279	316
Zfp261	151	166	173	120	152	138
Zfp26	21	22	20	24	23	22
Zfp259	210	222	223	181	229	193
Zfp251	118	117	127	107	110	107
Zfp239	23	22	24	20	31	22
Zfp238	132	131	143	138	161	154
Zfp236	103	96	94	73	83	86
Zfp235	31	20	26	23	29	27
Zfp219	84	100	108	88	89	82
Zfp217	19	22	26	22	35	25
Zfp213	57	62	62	69	65	55
Zfp212	393	458	472	369	456	381
Zfp207	139	144	144	163	166	145
Zfp202	29	27	27	25	31	26
Zfp2	36	38	35	49	41	53
Zfp198	13	12	14	13	12	13
Zfp192	14	20	18	21	18	17
Zfp191	33	31	29	32	29	32
Zfp189	20	17	21	19	15	18
Zfp187	435	432	402	405	404	421
Zfp185	30	31	32	31	33	32
Zfp184	25	23	19	25	19	22
Zfp182	24	19	26	22	25	24
Zfp180	19	17	29	12	21	17
Zfp179	23	23	26	30	25	15
Zfp174	15	17	16	18	23	14
Zfp162	65	78	92	47	59	38
Zfp161	40	43	33	35	53	41
Zfp160	60	48	55	69	65	63
Zfp148	93	81	88	74	98	93
Zfp143	60	48	47	49	65	47
Zfp142	15	18	20	23	19	25
Zfp131	307	313	294	349	371	325
Zfp13	28	22	19	29	24	20
Zfp128	23	22	27	28	20	25
Zfp120	10	16	16	13	11	16
Zfp119	54	52	58	85	72	95
Zfp113	17	16	15	12	14	17
Zfp112	12	11	18	14	18	14
Zfp111	14	18	19	13	19	16
Zfp110	20	18	13	14	11	15
Zfp11	30	32	24	30	33	25
Zfp109	14	19	19	19	14	16
Zfp108	16	14	18	16	19	17
Zfp106	35	38	42	32	41	37
Zfp105	22	18	19	18	18	22
Zfp101	38	35	36	46	39	50
Zfp1	30	28	27	24	24	29
Zfml	83	82	86	113	114	132
Zfhx2	101	100	108	63	74	67
Zfhx1b	225	194	195	157	210	183
Zfhx1a	377	337	320	283	351	275
Zfh4	19	19	26	22	17	20
Zfat1	27	27	24	20	21	22
Zfand6	622	575	497	811	601	776
Zfand2b	127	126	151	184	147	180
Zfa	10	11	10	9	10	13
Zf	19	21	23	20	19	29
Zec	36	41	40	29	43	40
Zdhhc9	108	105	98	65	80	88
Zdhhc7	401	467	499	379	433	409
Zdhhc6	236	208	223	221	222	239
Zdhhc4	286	361	382	289	341	349
Zdhhc3	83	70	73	53	61	73
Zdhhc24	21	24	26	33	29	26
Zdhhc23	19	15	17	20	19	18
Zdhhc22	18	18	9	16	13	18
Zdhhc21	69	57	69	78	91	80
Zdhhc2	12	15	16	16	16	18
Zdhhc19	17	22	18	19	14	24
Zdhhc18	20	23	23	18	23	18
Zdhhc17	30	28	37	35	32	29
Zdhhc16	107	104	112	131	126	111
Zdhhc15	19	18	20	24	19	17
Zdhhc14	105	106	95	74	79	72
Zdhhc13	184	156	167	177	141	175
Zdhhc12	438	477	505	477	449	452
Zdhhc1	43	55	44	44	53	56
Zcwpw1	25	27	33	41	43	45
Zcwcc3	18	16	20	20	17	25
Zcwcc2	13	18	12	11	15	17
Zcwcc1	186	188	199	165	180	170
Zcrb1	835	793	828	1076	943	1046
Zcchc9	82	73	82	74	80	86
Zcchc8	426	401	456	354	406	393
Zcchc7	148	123	119	150	152	158
Zcchc6	590	526	585	431	549	532
Zcchc5	17	16	18	16	14	14
Zcchc4	16	16	23	28	25	21
Zcchc3	44	44	46	30	41	33
Zcchc18	13	21	22	16	12	15
Zcchc16	16	17	15	17	14	19
Zcchc14	142	168	163	94	101	94
Zcchc12	21	23	22	19	21	19
Zcchc11	16	15	18	14	16	14
Zc3hdc8	26	28	31	30	36	33
Zc3hdc6	63	61	46	50	48	58
Zc3hdc5	57	58	61	54	55	53
Zc3hdc3	109	104	117	69	77	63
Zc3hdc1	92	107	82	89	94	99
Zc3hc1	203	221	214	201	198	193
Zc3hav1	35	27	27	29	29	38
Zc3h7a	110	90	102	121	133	149
Zc3h14	151	149	158	156	117	124
Zc3h12a	92	88	86	75	89	79
Zbtb9	26	24	24	23	31	35
Zbtb8	21	19	17	22	24	18
Zbtb7	234	276	279	148	173	171
Zbtb5	62	75	67	67	86	71
ZBTB45	34	44	42	38	35	35
Zbtb40	20	20	23	21	20	21
Zbtb37	17	16	10	16	16	19
Zbtb33	190	174	172	209	181	215
Zbtb32	17	17	17	21	21	19
Zbtb3	25	33	36	28	30	25
Zbtb24	117	115	101	100	106	98
Zbtb2	66	59	66	51	71	74
Zbtb17	216	251	250	231	242	245
Zbtb1	20	14	19	25	19	21
Zbp1	50	59	47	43	59	55
Zbed4	50	49	54	34	45	52
Zbed3	16	17	19	15	16	13
Zap70	75	85	88	79	99	91
Zan	24	22	19	22	25	25
Zadh2	225	208	197	227	202	202
Zadh1	45	39	56	47	53	46
Yy1	15	14	14	17	18	16
Ywhaz	1638	1715	1740	1493	1576	1336
Ywhaq	624	518	449	544	576	569
Ywhah	1094	1033	1009	1200	987	963
Ywhag	346	353	372	242	305	286
Ywhae	47	59	64	51	47	61
Ywhab	1300	1322	1270	1118	1294	1293
Ythdf3	107	84	87	117	108	109
Ythdf2	580	545	548	529	488	507
Ythdf1	179	178	170	148	206	180
Ysg2	43	52	53	46	52	46
Yrdc	85	67	65	107	84	83
Ypel5	40	34	36	35	37	35
Ypel4	24	19	24	19	19	16
Ypel3	2255	2457	2426	2432	2413	2331
Ypel2	16	14	10	15	16	13
Ypel1	26	23	22	21	23	26
Yod1	76	84	78	79	78	83
Yme1l1	79	70	75	102	72	94
Ylpm1	45	55	62	44	51	44
Ykt6	387	420	415	444	379	357
Yipf3	646	706	695	573	597	523
Yif1a	352	444	444	453	424	436
Yghl1-4	16	16	18	16	18	20
Yes	15	19	20	15	12	19
Yeats4	600	566	516	748	698	729
Yeats2	97	98	106	76	87	87
Ybx2	20	25	21	21	19	20
Yars	15	17	13	16	20	19
Yap1	172	197	190	176	150	166
Yaf2	62	53	51	87	64	73
Xylt2	52	63	58	50	60	52
Xylt1	21	26	22	22	24	22
Xylb	17	15	17	10	13	19
Xtrp3s1	18	17	21	23	20	20
Xrn2	18	24	29	27	21	22
Xrn1	20	17	15	22	15	21
Xrcc5	16	19	18	20	17	19
Xrcc4	63	66	58	108	70	83
Xrcc3	20	19	20	15	17	15
Xrcc2	26	17	31	24	33	27
Xrcc1	78	94	81	71	89	74
Xpr1	173	146	151	123	131	128
Xpo7	29	24	17	21	20	14
Xpo6	122	128	152	80	112	71
Xpo5	43	47	42	37	59	44
Xpo4	19	19	26	22	26	16
Xpo1	17	15	15	21	17	21
Xpnpep2	113	139	129	93	114	87
Xpnpep1	562	598	549	401	491	448
Xpc	162	161	159	172	154	143
Xpa	225	239	245	347	265	329
Xmr	19	20	19	19	18	18
Xlr5d	18	19	17	21	16	17
Xlr5c	20	19	21	24	20	13
Xlr4c	19	20	18	20	23	16
Xlr4b	18	18	16	18	20	12
Xlr4a	259	200	324	360	317	450
Xlr3b	13	11	11	9	18	13
Xlr3a	14	16	18	17	15	11
Xlr	15	14	18	11	14	19
Xlkd1	562	468	472	352	390	502
Xkrx	22	28	26	27	25	34
Xkr9	20	14	15	15	16	17
Xkr7	28	27	32	37	26	25
Xkr4	18	13	17	22	15	17
Xkh	23	20	28	22	21	17
Xist	62	40	52	42	45	36
Xdh	516	511	495	400	421	334
Xcr1	14	14	13	12	15	15
Xcl1	31	31	27	39	43	56
Xbp1	2011	2413	2356	1946	2325	2548
Xab2	26	20	20	22	26	22
Xab1	231	253	218	261	287	259
X83328	185	180	190	192	179	194
Wwp2	157	193	166	109	141	117
Wwp1	103	87	82	108	95	95
Wwox	26	27	29	24	21	20
Wwc1	98	118	121	73	80	64
Wtip	449	496	482	511	471	463
Wtap	27	19	22	22	17	25
Wt1	35	32	29	34	36	34
Wsb2	767	699	791	652	742	654
Wsb1	446	370	332	522	437	449
Wrnip1	15	16	16	15	17	16
Wrn	176	141	152	118	155	149
Wrb	173	156	147	182	177	192
Wnt9b	19	18	13	12	19	18
Wnt9a	22	25	20	20	24	17
Wnt8b	13	16	14	19	16	15
Wnt8a	16	15	13	16	16	19
Wnt7b	38	48	49	41	45	42
Wnt7a	52	63	51	43	59	50
Wnt6	18	17	16	17	21	18
Wnt5b	31	35	32	27	31	28
Wnt5a	65	61	57	73	59	57
Wnt4	39	44	49	43	48	43
Wnt3a	207	253	239	182	187	147
Wnt3	20	18	15	15	14	15
Wnt2b	17	19	19	20	19	20
Wnt2	105	111	76	128	121	114
Wnt16	17	22	22	23	17	16
Wnt11	20	18	20	21	23	18
Wnt10b	23	20	18	19	24	12
Wnt10a	22	17	26	20	24	37
Wnt1	21	18	17	13	19	20
Wiz	66	61	67	42	54	59
Wisp2	378	388	390	449	368	318
Wisp1	57	59	61	57	46	49
Wipi2	78	93	95	79	87	90
Wipi1	163	142	178	152	114	112
Wins2	69	73	48	69	67	74
Wig1	91	83	68	50	77	65
Wif1	40	56	42	43	62	45
Whsc2	143	143	168	135	152	133
Whrn	49	56	56	40	45	44
Whdc1	69	73	74	76	82	71
Wfs1	68	65	73	52	53	53
Wfikkn2	20	27	26	25	25	20
Wfdc8	18	18	21	17	18	14
Wfdc6b	26	32	23	46	31	32
Wfdc6a	38	38	38	38	38	35
Wfdc5	14	19	15	15	19	19
Wfdc16	17	17	18	17	17	21
Wfdc15	13	17	18	20	20	19
Wfdc13	14	31	14	23	25	22
Wfdc12	36	49	58	63	56	46
Wfdc10	21	21	18	31	17	18
Wfdc1	322	355	348	313	323	387
Wee1	20	16	21	13	17	16
Wdtc1	17	19	18	16	18	18
Wdt3-pending	117	123	129	134	120	136
Wdr9	88	87	90	69	78	90
Wdr85	26	18	20	19	19	21
Wdr8	31	32	39	39	43	42
Wdr77	94	98	81	94	115	102
Wdr75	207	193	183	196	219	216
Wdr72	21	23	17	17	15	21
Wdr70	19	25	23	22	20	20
Wdr68	986	1081	985	668	878	778
Wdr60	62	66	69	69	84	92
Wdr6	200	196	182	136	171	143
Wdr5b	29	28	27	20	21	21
Wdr51b	154	156	145	140	149	134
Wdr5	78	66	61	64	76	71
Wdr47	39	28	30	33	35	42
Wdr45l	236	239	238	317	302	281
Wdr45	356	341	297	332	335	307
Wdr44	20	21	23	20	19	21
Wdr42a	18	20	27	21	32	28
Wdr41	25	22	22	21	23	17
Wdr40b	17	11	10	16	17	14
Wdr40a	23	16	27	27	25	26
Wdr4	24	24	22	32	23	33
Wdr37	28	28	17	39	37	35
Wdr36	20	15	14	13	14	17
Wdr35	11	20	15	17	20	22
Wdr34	96	98	108	124	124	134
Wdr33	31	36	40	28	27	29
Wdr31	22	25	23	25	29	27
Wdr3	27	22	22	21	26	25
Wdr26	14	14	15	9	14	17
Wdr23	65	63	47	57	62	61
Wdr22	89	88	100	73	87	84
Wdr21	59	59	67	69	66	62
Wdr20a	110	87	98	111	103	109
Wdr20	16	19	21	18	18	20
Wdr19	18	15	12	13	14	15
Wdr18	40	39	35	31	38	27
Wdr17	18	15	16	17	13	21
Wdr13	43	49	52	54	43	58
Wdr12	12	12	15	15	13	12
Wdr11	52	41	41	45	46	46
Wdr10	48	38	31	29	40	45
Wdr1	1218	1241	1291	911	1054	1054
Wdhd1	24	17	23	21	27	21
Wdfy3	26	28	28	19	26	19
Wdfy2	22	22	23	22	31	21
Wdfy1	20	21	17	16	18	27
Wbscr5	300	252	331	464	393	406
Wbscr27	27	27	31	32	37	34
Wbscr24	20	22	28	24	25	24
Wbscr22	186	198	196	250	239	223
Wbscr21	185	204	205	247	232	221
Wbscr18	331	368	313	340	322	296
Wbscr16	36	33	30	27	43	42
Wbscr1	2771	2776	2759	2509	2792	2622
Wbp5	1428	1231	1321	2265	1558	2127
Wbp4	103	99	110	88	102	124
Wbp2nl	19	13	15	14	23	16
Wbp2	3709	4546	4397	2678	3090	2664
Wbp11	355	373	334	251	276	221
Wbp1	162	163	151	226	183	198
Waspip	376	287	336	271	311	275
Wasl	556	491	536	436	532	450
Wasf3	19	16	19	18	20	12
Wasf2	54	51	47	31	31	21
Wasf1	50	41	38	32	38	36
Was	169	165	145	143	166	168
Wars2	35	35	35	24	27	24
Wars	324	413	374	278	361	298
Wap	14	13	14	14	18	15
Wac	15	16	13	12	14	16
Vwf	1876	2255	1999	1190	1524	1393
Vwa2	19	19	24	20	18	20
Vwa1	17	18	19	16	17	18
Vtn	144	78	78	61	77	58
Vti1b	1324	1330	1218	1608	1518	1691
Vti1a	112	104	116	156	137	144
Vsx1	20	15	20	14	18	15
Vstm2	24	22	26	21	26	24
Vsnl1	146	158	170	148	132	117
Vsig4	45	42	33	31	35	26
Vrk3	222	272	260	202	239	212
Vrk2	42	35	47	51	49	43
Vrk1	72	67	61	66	76	52
Vps8	21	18	15	15	15	15
Vps54	425	325	379	386	381	404
Vps53	672	796	730	524	629	515
Vps4b	30	31	29	31	37	36
Vps4a	144	169	133	145	138	147
Vps45	97	100	87	104	93	84
Vps41	61	67	67	56	43	61
Vps39	31	32	35	31	31	29
Vps35	356	295	339	374	333	379
Vps33b	81	68	72	78	76	88
Vps33a	176	161	172	149	189	183
Vps29	1231	1130	1242	1919	1504	1784
Vps28	4098	4356	4356	3629	3989	3650
Vps26	1075	1135	1110	1330	1130	1084
Vps25	525	592	570	562	541	572
Vps24	169	174	178	223	194	204
Vps18	226	203	206	156	185	189
Vps16	188	169	187	181	198	182
Vps13c	11	17	21	22	15	19
Vps11	99	117	121	100	115	102
Vpreb3	230	337	299	222	251	263
Vpreb2	8	15	13	10	16	7
Vpreb1	19	19	18	23	23	17
Vnn3	258	316	288	319	257	270
Vnn1	21	15	16	14	18	12
Vmp	15	16	16	13	15	19
Vmo1	23	19	22	27	18	20
Vldlr	343	296	274	277	256	255
Vkorc1l1	268	268	223	330	271	341
Vkorc1	746	816	811	913	773	780
Vit	17	21	18	18	19	21
Vipr2	25	20	19	22	21	19
Vipr1	21	18	17	17	27	18
Vip	17	19	22	17	19	15
Vim	1602	1817	1870	1115	1109	1166
Villp	20	25	21	14	17	10
Vill	26	37	31	31	27	21
Vil2	384	452	353	268	385	389
Vil1	15	15	11	15	11	12
Viaat	21	21	16	15	14	20
Vhlh	44	49	49	47	51	46
Vgll4	86	98	95	86	87	82
Vgll2	19	21	26	19	17	24
Vgll1	14	16	18	17	16	17
Vgf	14	16	19	17	17	13
Vezf1	400	441	419	387	384	352
Veph1	17	15	18	17	18	16
Vegfc	124	117	125	125	117	126
Vegfb	328	376	379	313	327	312
Vegfa	1358	1104	1309	1175	1205	1123
Vdrip	145	153	136	152	139	149
Vdr	45	53	55	34	43	50
Vdp	162	158	172	175	200	203
Vdac3	456	422	374	591	464	529
Vdac2	468	477	508	468	477	445
Vdac1	126	121	134	128	155	123
Vcp	1971	1806	1989	1362	1837	1504
Vcl	1048	963	898	677	877	804
Vcan	15	16	17	15	17	14
Vcam1	743	616	630	540	623	513
Vbp1	96	88	90	134	121	156
Vax2	20	23	19	25	23	20
Vax1	17	19	23	23	16	24
Vav3	110	81	100	107	100	99
Vav2	20	22	20	22	18	19
Vav1	273	279	306	215	303	264
Vat1	298	294	292	177	259	243
Vasp	31	35	26	33	37	30
Vars2l	157	187	165	140	189	149
Vars	234	270	245	165	241	222
Vapb	153	131	128	192	164	167
Vapa	203	180	196	208	224	274
Vangl1	25	34	21	20	17	22
Vamp8	1294	1214	1225	1563	1430	1441
Vamp5	94	96	93	96	91	103
Vamp4	219	234	205	254	229	257
Vamp3	801	778	779	758	753	758
Vamp2	242	263	285	209	200	198
Vamp1	31	34	33	33	35	40
Vac14	49	62	55	40	31	43
V2r8	14	18	17	18	16	18
V2r4	27	24	24	19	27	29
V2R2	18	14	16	12	13	16
V2r2	12	12	12	17	16	13
V2r16	10	11	10	7	13	7
V2r15	13	15	15	17	16	13
V2r10	24	21	26	20	23	24
V1rl1	19	15	17	19	21	15
V1rk1	15	16	13	13	15	15
V1rj3	17	19	18	19	21	26
V1rj2	11	10	10	12	11	14
V1ri9	20	18	22	19	17	14
V1ri8	21	24	30	23	26	19
V1ri7	16	11	14	9	17	12
V1ri6	13	14	12	13	16	17
V1ri5	10	13	13	14	11	10
V1ri4	18	22	17	22	16	16
V1ri3	17	16	17	16	20	20
V1ri2	16	23	14	10	17	11
V1ri10	15	20	14	18	19	17
V1ri1	20	17	19	13	16	20
V1rh9	15	18	16	15	11	12
V1rh8	16	17	13	15	10	18
V1rh7	20	19	22	18	16	13
V1rh6	20	18	18	23	16	18
V1rh5	20	18	21	17	17	13
V1rh4	19	20	20	17	18	22
V1rh3	25	30	23	25	24	32
V1rh21	20	20	18	18	16	26
V1rh20	16	16	13	12	13	11
V1rh2	13	22	16	13	24	22
V1rh18	18	20	26	23	17	25
V1rh17	16	17	15	20	14	16
V1rh16	16	9	19	17	18	8
V1rh14	18	18	19	20	16	17
V1rh13	20	20	16	15	21	15
V1rh12	20	19	16	13	18	19
V1rh11	11	9	10	12	10	14
V1rh10	18	15	18	15	11	19
V1rh1	13	17	19	18	13	15
V1rg9	10	15	21	20	18	17
V1rg8	13	13	14	16	13	15
V1rg7	10	17	16	11	14	15
V1rg6	17	11	10	13	12	14
V1rg5	14	14	19	16	15	15
V1rg4	19	18	19	22	18	16
V1rg3	18	22	17	22	16	15
V1rg2	12	15	18	15	20	14
V1rg12	14	19	17	16	17	17
V1rg11	20	17	22	23	19	25
V1rg10	13	15	9	16	12	13
V1rg1	14	18	18	13	14	16
V1rf5	20	17	16	15	14	20
V1rf4	15	19	16	15	15	16
V1rf3	14	13	16	15	16	18
V1rf2	19	23	17	18	19	22
V1rf1	12	16	17	16	17	13
V1re9	20	15	21	22	25	20
V1re8	15	14	16	15	11	14
V1re7	22	20	27	20	20	25
V1re6	13	16	14	12	13	15
V1re5	12	19	10	15	13	16
V1re4	13	16	17	15	14	14
V1re3	18	16	18	14	13	19
V1re2	20	15	15	18	16	15
V1re13	15	15	13	12	17	16
V1re12	12	16	16	17	18	19
V1re11	19	14	18	16	18	17
V1re10	16	10	9	11	18	12
V1re1	19	15	20	20	18	27
V1rd9	18	12	18	12	17	11
V1rd7	14	13	13	13	15	15
V1rd6	12	20	21	17	20	20
V1rd4	20	22	21	19	20	16
V1rd3	20	14	20	22	18	24
V1rd21	13	14	15	12	13	14
V1rd20	14	17	11	14	19	18
V1rd2	12	19	18	24	18	21
V1rd19	17	13	14	18	14	12
V1rd18	19	13	17	12	13	10
V1rd17	22	17	16	16	18	21
V1rd16	13	12	14	13	15	17
V1rd15	19	17	10	15	12	11
V1rd14	7	14	12	15	14	14
V1rd13	13	15	11	10	15	12
V1rd12	14	12	15	20	15	18
V1rd11	20	21	14	19	19	21
V1rd10	14	9	10	16	10	15
V1rd1	21	19	20	28	27	26
V1rc8	15	10	16	20	17	16
V1rc7	13	19	19	15	19	21
V1rc6	14	15	15	16	16	16
V1rc5	14	20	15	17	18	13
V1rc33	21	20	14	14	17	21
V1rc32	13	8	12	16	18	14
V1rc30	10	11	12	9	10	11
V1rc3	20	16	16	20	17	20
V1rc29	21	18	18	20	18	25
V1rc28	10	12	15	9	10	9
V1rc27	10	6	8	8	12	17
V1rc26	12	16	11	15	15	17
V1rc25	21	16	22	20	24	21
V1rc24	12	18	16	22	18	19
V1rc23	14	13	13	15	11	13
V1rc22	19	16	18	18	16	14
V1rc21	16	15	15	15	9	16
V1rc20	16	15	17	16	18	16
V1rc2	16	11	15	14	14	15
V1rc19	12	15	19	13	19	14
V1rc18	13	15	13	14	13	16
V1rc17	13	14	14	12	12	14
V1rc16	14	17	18	16	17	16
V1rc15	5	9	11	9	6	12
V1rc14	16	15	10	16	10	19
V1rc13	11	16	12	14	11	11
V1rc12	14	18	15	14	12	11
V1rc11	17	15	12	12	17	15
V1rc10	10	19	15	17	19	12
V1rc1	15	14	11	13	9	15
V1rb9	16	17	20	16	19	18
V1rb8	7	16	12	17	15	14
V1rb7	11	8	15	14	16	13
V1rb6	14	18	17	15	16	15
V1rb5	14	20	15	17	14	17
V1rb4	9	10	9	11	11	13
V1rb3	17	14	15	12	15	14
V1rb2	18	17	16	15	15	12
V1rb1	19	24	19	18	19	21
V1ra8	11	14	19	16	14	22
V1ra7	12	16	15	11	15	16
V1ra6	20	20	16	18	17	17
V1ra4	16	9	12	14	9	13
V1ra3	21	19	19	21	19	14
V1ra2	22	24	24	33	23	29
V1ra1	20	18	18	18	16	20
Uxt	419	413	416	669	586	631
Uxs1	17	15	16	16	16	19
Uvrag1	339	321	324	302	325	316
Uty	25	26	27	31	33	22
Utx	360	248	289	336	397	312
Uts2r	16	14	16	17	16	20
Uts2	19	14	21	12	15	12
Utrn	26	21	33	25	27	25
Utp14b	20	14	17	19	19	19
Utf1	15	19	16	18	15	17
Ust	17	11	15	16	17	19
Usp9y	17	14	17	17	18	15
Usp9x	21	22	17	21	19	25
Usp8	52	47	56	43	36	35
Usp7	104	76	95	76	83	82
Usp6nl	85	84	84	73	104	80
Usp54	147	140	158	104	153	119
Usp53	25	19	21	22	19	22
Usp52	126	126	138	102	113	119
Usp5	58	51	57	52	72	65
Usp49	17	16	12	17	20	18
Usp48	15	23	15	19	14	16
Usp47	292	258	276	231	271	260
Usp43	28	23	23	16	23	20
Usp4	173	183	191	145	185	166
Usp39	240	245	240	247	247	237
Usp38	38	41	38	40	51	47
Usp37	20	20	22	18	29	26
Usp33	489	477	416	532	506	557
Usp30	40	34	33	29	35	25
Usp3	210	199	232	219	212	225
Usp29	14	18	17	19	18	19
Usp28	32	33	35	37	36	34
Usp27x	17	19	16	16	14	18
Usp26	20	17	18	24	15	20
Usp25	36	33	33	28	41	35
Usp24	19	16	20	19	19	17
Usp22	279	240	265	207	248	206
Usp21	57	60	57	57	58	53
Usp20	140	161	161	119	161	134
Usp2	80	96	88	71	72	66
Usp19	50	50	62	47	46	49
Usp18	290	380	332	298	303	315
Usp17	15	12	11	13	20	13
Usp16	149	131	148	164	137	163
Usp15	14	12	13	15	11	14
Usp14	57	49	47	58	52	56
Usp13	21	18	24	16	19	19
Usp12	35	33	35	31	35	35
Usp11	22	27	20	21	24	22
Usp10	31	27	38	28	33	42
Usp1	128	107	113	103	109	119
Usmg5	38	34	37	47	39	40
Ushbp1	68	69	66	78	74	67
Ush3a	20	23	26	20	30	26
Ush2a	199	208	161	132	160	170
Ush1g	17	15	20	18	17	18
Ush1c	23	13	19	13	15	17
Usf2	51	47	40	41	32	35
Usf1	64	66	55	74	74	87
Urp	15	15	15	10	13	20
Uros	55	60	54	79	73	87
Urod	998	922	989	1054	992	988
Ureb1	61	73	64	50	64	66
Uqcrh	2312	2337	2323	3078	2532	2980
Uqcrfs1	18	17	27	20	25	17
Uqcrc2	1478	1337	1354	1454	1182	1368
Uqcrc1	616	553	573	544	604	507
Uqcrb	558	556	639	835	784	988
Uqcr	1923	1736	1845	2407	2199	2541
Uprt	14	13	19	16	18	13
Upp2	27	23	23	19	16	22
Upp1	282	300	310	325	312	282
Upk3b	198	208	221	184	213	186
Upk3a	22	20	26	27	27	24
Upk2	26	26	22	28	29	29
Upk1b	243	246	223	232	224	213
Upk1a	26	22	26	27	26	17
Upf3b	21	17	20	27	18	14
Upf3a	88	93	93	92	97	84
Upf2	438	386	415	314	425	403
Upf1	97	101	121	76	101	96
Upb1	38	18	20	25	26	26
Uox	90	21	30	24	23	27
Ung	56	65	62	76	76	75
Uncx4.1	17	21	17	14	15	10
Unc93b1	401	447	440	395	495	353
Unc93a	21	17	19	15	18	19
Unc84b	518	500	552	320	423	368
Unc84a	356	264	262	248	277	245
Unc5d	14	13	14	14	18	16
Unc5cl	11	11	14	16	15	15
Unc5c	56	63	56	58	68	52
Unc5b	75	70	67	34	43	43
Unc5a	19	21	14	21	17	21
Unc50	13	12	12	17	14	17
Unc13d	107	112	100	88	115	87
Unc13c	20	17	19	15	15	16
Unc13b	285	249	282	189	219	240
Unc119	61	55	56	67	62	80
Umps	53	59	62	61	43	51
Umod	18	18	17	14	14	17
Ulk2	140	100	113	94	98	107
Ulk1	114	105	130	87	109	105
Uimc1	25	23	31	25	32	29
Uhrf2	539	480	510	495	556	547
Uhrf1	123	128	135	100	127	117
Uhmk1	14	17	17	18	18	18
Ugt8	19	19	17	16	19	18
Ugt3a1	27	20	16	15	15	19
Ugt2b5	13	14	15	13	12	12
Ugt2b36	65	15	15	13	17	17
Ugt2a3	20	16	18	18	18	16
Ugt2a2	16	27	20	23	16	17
Ugt2a1	9	12	15	13	16	10
Ugt1a6a	60	128	116	85	70	75
Ugt1a2	26	17	17	23	20	24
Ugt1a10	310	314	308	289	253	245
Ugp2	179	168	166	184	166	188
Ugdh	11	15	13	19	16	17
Ugcgl1	424	425	442	312	387	375
Ugcg	756	679	654	606	672	618
Ugalt2	735	837	843	720	776	832
Ucp3	21	21	15	21	21	21
Ucp2	19	24	26	21	19	16
Ucp1	22	16	14	18	17	15
Ucn3	16	20	18	20	18	21
Ucn	16	21	17	21	24	17
Uckl1	11	10	14	10	14	20
Uck2	131	139	150	133	130	131
Uck1	77	106	110	124	103	108
Uchl5	81	86	78	85	66	93
Uchl4	16	13	10	17	15	11
Uchl3	128	102	84	163	128	175
Uchl1	39	44	38	47	36	32
Ubxd4	24	25	18	31	24	18
Ubxd3	45	36	38	35	43	42
Ubxd2	20	19	13	22	19	17
Ubxd1	208	274	238	284	222	249
Ubtf	158	124	142	113	147	139
Ubtd2	121	98	96	112	107	95
Ubtd1	52	47	48	50	60	56
Ubr1	221	183	185	202	202	195
Ubqln2	16	16	15	21	14	21
Ubqln1	753	806	752	613	778	774
Ubp1	174	161	188	177	176	199
Uble1b	324	274	274	330	285	294
Ublcp1	305	272	273	371	330	368
Ubl7	301	339	334	269	293	234
Ubl5	2812	2804	2616	3403	2842	3241
Ubl4	182	172	177	288	246	282
Ubl3	1166	1028	972	1105	1090	1002
Ubie	19	15	17	17	19	15
Ube4b	268	302	295	169	231	184
Ube4a	19	21	26	21	31	32
Ube3c	224	188	258	210	224	220
Ube3b	369	422	357	243	303	279
Ube3a	52	40	48	51	51	52
Ube2v2	13	13	13	11	11	26
Ube2u	18	23	14	28	18	19
Ube2s	21	27	22	23	33	28
Ube2r2	23	23	35	21	21	24
Ube2q2	124	119	133	132	133	138
Ube2q	587	538	607	596	545	554
Ube2n	123	117	124	164	144	160
Ube2m	109	102	102	129	115	110
Ube2l6	81	81	72	115	64	79
Ube2l3	958	1112	1005	674	837	750
Ube2j2	31	34	32	33	29	29
Ube2j1	42	47	53	45	43	55
Ube2i	34	36	37	43	33	29
Ube2g2	22	34	29	31	26	26
Ube2g1	191	185	193	245	221	240
Ube2f	278	311	279	399	299	375
Ube2e3	142	147	150	156	95	125
Ube2e2	473	475	434	504	432	438
Ube2e1	49	50	44	80	60	52
Ube2d3	92	82	81	116	84	96
Ube2d2	1154	1144	1123	1291	1378	1290
Ube2d1	21	16	21	21	14	21
Ube2c	18	20	19	16	17	20
Ube2b	944	974	909	1403	1112	1329
Ube2a	136	117	117	159	133	151
Ube1y1	15	19	19	19	11	17
Ube1x	507	628	559	347	444	355
Ube1l	495	623	579	459	599	486
Ube1dc1	371	354	412	362	353	397
Ube1c	88	73	92	107	92	105
Ubd	30	32	33	43	64	65
Ubce7ip1	29	32	24	23	23	22
Ubc	5031	4849	4754	4015	4585	3966
Ubb	11445	12823	11644	11445	10806	11065
Ubash3a	16	19	18	17	23	20
Ubap2l	119	124	116	71	81	75
Ubap2	488	537	536	272	411	352
Ubap1	121	129	124	124	136	107
Ubadc1	127	110	117	153	131	154
Uap1l1	604	568	632	596	620	626
Uap1	195	221	208	214	192	239
Uaca	541	626	668	451	565	478
U46068	456	861	625	150	421	442
U2af2	53	52	61	61	73	75
U2af1l4	52	61	68	82	52	53
U2af1-rs2	84	62	73	111	80	92
U2af1-rs1	17	21	19	20	17	18
Tyw1	31	34	32	30	36	34
Tyrp1	18	15	17	16	18	15
Tyrobp	814	674	766	993	902	1112
Tyro3	21	16	21	24	20	19
Tyr	11	19	16	15	14	17
Tyms-ps	75	76	78	112	88	105
Tyms	116	114	134	157	107	131
Tyki	97	106	94	71	93	91
Tyk2	203	214	203	149	207	213
Txnrd3	71	70	74	76	86	81
Txnrd2	103	109	112	100	116	104
Txnrd1	21	31	32	24	25	28
Txnl6	15	16	13	14	18	13
Txnl5	14	15	18	16	17	13
Txnl4b	121	163	149	167	136	151
Txnl4	362	382	420	503	416	393
Txnl2	82	82	87	110	112	107
Txnl1	11	8	11	11	9	7
Txnip	2892	2522	2541	1820	2116	2419
Txndc9	25	24	20	27	19	24
Txndc8	11	11	9	9	11	8
Txndc7	67	71	66	79	82	79
Txndc5	547	655	665	574	816	856
Txndc4	26	32	28	25	31	35
Txndc3	13	10	14	10	13	7
Txndc2	16	15	14	14	13	13
Txndc13	257	211	240	211	228	239
Txndc1	61	61	75	80	90	91
Txn2	87	90	90	89	86	94
Txn1	199	173	149	189	233	303
Txlnb	23	27	27	27	20	25
Txln	68	81	80	65	64	71
Txk	25	19	14	22	19	20
Twsg1	969	962	825	871	816	805
Twistnb	75	67	68	96	83	99
Twist2	26	28	29	33	31	27
Twist1	25	23	26	19	24	29
Tusc5	26	24	18	19	20	28
Tusc4	223	227	237	232	267	269
Tusc2	98	91	98	136	103	119
Tusc1	21	19	17	19	12	18
Tulp4	515	455	437	377	401	392
Tulp3	34	28	29	21	25	35
Tulp2	21	19	21	23	24	25
Tulp1	23	19	20	28	23	24
Tug1	69	61	82	56	83	78
Tuft1	399	452	382	360	379	384
Tufm	532	601	583	445	517	447
Tubgcp5	20	23	19	16	21	19
Tubgcp3	13	15	14	21	17	19
Tubgcp2	174	153	178	134	178	144
Tubg2	74	80	78	74	80	71
Tubg1	122	149	144	128	116	115
Tube1	19	17	17	20	19	20
Tubd1	48	49	45	51	41	50
Tubb5	3669	4045	4161	3090	3434	2927
Tubb4	53	60	56	40	49	46
Tubb3	23	20	27	25	20	21
Tubb2b	317	390	412	425	356	330
Tubb2	20	21	17	18	16	20
Tubb1	23	17	22	25	20	18
Tuba8	41	47	40	47	52	61
Tuba7	32	44	38	33	36	38
Tuba6	485	645	605	588	636	638
Tuba4	23	24	30	25	21	33
Tuba3	37	30	37	46	41	26
Tuba1b	5895	6452	6181	5792	5647	4931
Tuba1a	1065	1300	1141	1187	957	961
Tub	31	28	37	22	27	20
Ttyh3	99	95	105	54	77	63
Ttyh2	63	79	85	63	61	73
Ttyh1	19	18	17	17	17	20
Ttrap	14	18	19	14	15	10
Ttr	1016	21	19	66	31	37
Ttpa	19	17	18	19	14	15
Ttn	37	39	35	25	41	24
Ttll5	16	14	13	11	9	12
Ttll4	17	22	22	22	24	19
Ttll11	20	21	19	28	24	24
Ttll1	43	36	44	35	43	40
Ttl	21	21	27	22	23	19
Ttk	20	19	14	16	17	13
Ttid	19	17	20	20	18	18
Ttf2	56	56	66	47	64	50
Ttf1	19	14	15	18	13	21
Ttc9	20	18	22	14	21	17
Ttc8	52	48	42	58	60	56
Ttc7	81	84	100	57	74	77
Ttc5	235	191	216	281	235	239
Ttc4	74	78	57	94	74	80
Ttc35	820	676	741	1075	905	1167
Ttc3	750	669	686	484	640	568
Ttc29	178	228	195	191	212	230
Ttc24	22	22	24	23	25	28
Ttc21a	35	32	32	32	35	33
Ttc19	83	80	85	114	108	105
Ttc17	261	242	292	155	194	191
Ttc16	20	24	18	16	23	28
Ttc15	21	17	20	24	21	19
Ttc14	52	48	49	49	53	62
Ttc13	371	337	348	328	330	353
Ttc12	27	28	28	27	24	35
Ttc1	209	183	180	258	212	233
Ttbk2	23	20	19	19	21	18
Tsx	16	25	18	17	15	24
Tsta3	703	750	703	742	734	788
Tst	232	283	287	350	309	307
Tssc4	59	47	61	76	71	69
Tssc1	272	377	351	364	358	343
Tsrc1	161	187	191	108	132	104
Tsr2	33	34	39	39	30	36
Tspyl3	127	121	122	109	117	114
Tspyl1	70	74	75	71	51	46
Tspo	1495	1649	1721	2356	2007	1961
Tspan7	1143	1132	1076	887	941	780
Tspan4	26	26	28	27	25	24
Tspan32	110	109	125	157	152	172
Tspan31	47	52	55	49	60	45
Tspan17	604	701	650	653	634	598
Tspan11	45	41	52	30	32	38
Tsnaxip1	45	55	44	54	53	72
Tsnax	744	723	673	777	714	756
Tsn	74	60	65	69	62	66
Tslp	18	22	19	22	18	16
Tsku	24	25	20	23	24	20
Tshr	14	17	13	17	13	18
Tshb	19	17	24	28	21	22
Tsga8	13	16	16	14	16	15
Tsga2	553	703	591	539	626	743
Tsga14	52	43	57	54	54	53
Tsga13	16	15	14	16	16	15
Tsga10	22	20	19	20	24	21
Tsg101	122	121	112	121	113	123
Tscot	13	20	15	15	19	15
Tsc22d3	1642	1147	1367	1190	1117	1591
Tsc2	784	877	928	437	544	477
Tsc1	21	20	21	20	18	18
Try4	12	14	9	13	14	14
Try10l	12	13	16	10	11	15
Try10	12	18	14	19	12	20
Trub2	1107	1109	1085	1110	1242	1233
Trpv6	30	33	28	25	32	32
Trpv5	26	23	27	17	25	22
Trpv4	25	31	28	30	38	27
Trpv3	13	11	12	12	14	13
Trpv2	147	128	141	113	122	124
Trpv1	12	19	19	20	18	13
Trpt1	116	146	131	153	152	122
Trps1	73	58	62	58	68	72
Trpm8	18	15	9	13	16	14
Trpm7	14	14	14	17	17	12
Trpm6	184	131	135	136	132	148
Trpm5	19	21	13	20	15	18
Trpm4	23	28	23	29	33	32
Trpm3	25	24	27	29	23	28
Trpm2	28	27	20	24	23	27
Trpm1	17	16	15	17	19	16
Trpd52l3	10	12	9	14	13	16
Trpc7	20	15	14	17	15	19
Trpc6	49	50	42	37	48	61
Trpc5	25	25	23	18	26	24
Trpc4ap	189	165	177	143	177	153
Trpc4	10	16	15	14	18	14
Trpc3	24	25	22	20	26	22
Trpc2	28	19	24	24	25	30
Trpc1	18	16	16	18	13	15
Trp73	17	16	22	22	18	21
Trp63	21	18	20	16	21	17
Trp53rk	21	24	28	20	30	25
Trp53inp2	212	206	218	189	207	188
Trp53inp1	274	251	265	370	341	442
Trp53i11	31	36	28	24	30	26
Trp53bp2	118	102	119	114	128	112
Trp53bp1	216	196	211	189	217	213
Trp53	148	164	182	126	121	111
Trove2	103	99	120	104	114	105
Tro	20	22	21	22	23	16
Trmt12	23	24	22	21	23	22
Trmt1	36	37	42	60	48	44
Trit1	99	106	117	93	101	99
Trip6	109	118	150	147	146	125
Trip4	19	19	27	19	21	16
Trip12	290	228	232	231	285	268
Trip10	105	102	109	110	117	103
Triobp	1296	1315	1274	874	1106	963
Triml1	15	14	12	13	19	18
Trim9	19	18	16	20	17	19
Trim8	1136	1265	1278	806	880	745
Trim75	15	15	16	11	17	15
Trim72	30	39	28	34	41	19
Trim65	33	34	27	29	33	30
Trim63	20	24	21	20	26	21
Trim6	26	21	20	28	26	24
Trim59	32	35	30	30	31	35
Trim58	14	15	19	16	14	18
Trim56	117	117	98	64	74	80
Trim50	15	13	15	16	12	13
Trim47	56	52	48	43	60	61
Trim46	34	31	38	33	27	25
Trim45	35	47	38	34	31	32
Trim44	26	25	20	24	21	20
Trim42	18	15	15	17	19	14
Trim41	195	208	195	175	181	157
Trim40	17	21	26	22	20	25
Trim39	157	163	163	141	153	158
Trim38	18	17	16	18	20	17
Trim37	17	22	22	18	17	20
Trim36	50	48	51	46	46	51
Trim35	35	30	35	30	31	26
Trim33	55	53	52	56	43	51
Trim32	289	280	278	219	221	217
Trim31	15	17	14	15	14	17
Trim30	91	94	94	92	100	106
Trim3	209	236	257	196	227	200
Trim29	61	67	67	44	52	86
Trim28	308	381	341	247	274	272
Trim26	287	339	351	277	270	241
Trim25	25	24	37	25	31	33
Trim23	75	63	53	88	74	92
Trim21	105	122	103	107	140	118
Trim2	138	115	125	124	145	119
Trim17	15	13	13	17	16	19
Trim16	70	79	78	72	67	58
Trim14	11	17	19	14	15	13
Trim13	16	15	12	16	12	14
Trim11	61	88	85	56	84	77
Trim10	19	16	11	117	27	41
Trik	14	18	19	17	17	13
Trib3	86	102	94	119	94	90
Trib2	287	251	263	205	302	280
Trib1	22	25	15	23	19	21
Trhr2	18	15	12	19	15	13
Trhr	15	12	10	13	15	11
Trhde	16	11	18	16	16	11
Trh	18	23	16	17	19	20
Trfr2	20	22	23	15	23	25
Trfp	217	222	234	247	228	221
Trf3	15	16	14	14	17	16
Trf	1620	1636	1434	1339	1178	1249
Trex2	20	25	19	24	26	29
Trex1	89	121	103	84	106	91
Trerf1	30	40	40	28	27	26
Treml4	34	46	37	34	37	38
Treml2	24	38	35	15	26	33
Treml1	83	67	72	156	65	93
Trem3	75	63	60	106	82	87
Trem2	438	347	433	468	462	511
Trem1	23	34	28	38	38	25
Treh	17	23	15	21	19	17
Trdn	18	15	15	19	14	18
Trcg1	26	26	28	29	29	32
Trar1	14	18	16	18	15	22
Trappc5	31	38	42	33	48	52
Trappc4	1596	1531	1517	1656	1660	1635
Trappc3	371	264	320	450	379	365
Trappc2	76	67	69	156	99	133
Trappc1	459	472	515	539	477	481
Trap1a	14	15	17	16	14	15
Trap1	335	395	381	388	444	426
Tram2	28	24	28	31	30	27
Tram1l1	15	16	11	15	16	21
Tram1	1489	1294	1333	1264	1436	1428
Trak2	244	239	239	219	256	243
Trak1	154	134	135	88	121	112
Traip	17	12	15	14	21	13
Trafd1	344	403	371	365	372	368
Traf7	64	67	68	69	78	69
Traf6	176	187	172	116	155	179
Traf5	33	37	30	25	32	26
Traf4	61	60	60	47	53	46
Traf3ip1	24	30	27	30	32	34
Traf3	221	236	250	162	196	166
Traf2	33	40	32	30	26	29
Traf1	115	117	140	119	118	130
Trabd	113	107	122	135	145	135
Tra2a	682	631	652	825	712	908
Tra1	1294	1069	1174	1190	1443	1558
Tpx2	21	20	26	15	18	24
Tpte	20	20	17	19	25	14
Tpt1	35	31	37	54	54	55
Tpst2	428	408	364	453	419	395
Tpst1	370	403	408	368	406	344
Tprkb	141	139	149	163	169	148
Tpra40	90	102	88	84	93	78
Tpr	339	303	346	267	362	307
Tpp2	101	78	87	103	97	100
Tpo	16	19	19	18	17	20
Tpmt	20	18	23	17	23	21
Tpm4	2032	2077	1967	2165	1878	1892
Tpm3	690	696	659	730	565	552
Tpm2	222	276	234	310	292	313
Tpm1	1240	1232	1107	1237	1175	1211
Tpk1	35	34	40	23	33	43
Tpi1	1081	1135	1246	989	1029	1035
Tph2	16	16	17	14	19	16
Tph1	15	14	15	12	14	12
Tpd52l2	188	154	187	195	195	209
Tpd52l1	23	24	20	25	27	36
Tpd52	1857	1786	1885	2001	1828	1971
Tpcn2	107	94	96	104	115	106
Tpcn1	382	397	419	239	274	237
Tpbpb	25	24	27	18	32	22
Tpbpa	15	17	15	16	19	19
Tpbg	39	44	41	34	29	28
Tparl	19	12	14	10	12	15
Tp53i11	18	17	24	16	24	28
Tor3a	132	156	176	141	177	142
Tor2a	31	32	33	38	41	32
Tor1b	84	74	76	75	79	71
Topors	179	149	160	170	155	166
Topbp1	20	17	21	16	19	16
Top3b	71	69	52	74	76	62
Top3a	21	22	19	24	25	17
Top2b	20	22	21	20	21	24
Top2a	61	44	56	35	53	50
Top1mt	48	42	45	44	40	55
Top1	75	76	64	75	62	75
Tomm70a	41	38	33	49	45	52
Tomm7	620	612	634	1051	933	992
Tomm40	24	27	21	25	18	24
Tomm34	156	193	189	124	173	149
Tomm22	406	368	310	482	451	437
Tomm20	20	18	16	13	18	20
Tom1l2	17	23	24	21	18	21
Tom1	59	67	55	53	43	42
Tollip	380	336	388	359	398	379
Toe1	116	96	106	123	122	124
Tob2	70	88	86	52	59	53
Tob1	121	128	103	109	122	135
Tnxb	202	213	210	142	145	134
Tnrc9	26	22	18	21	18	19
Tnrc6c	146	161	165	93	116	100
Tnrc6b	26	22	24	12	20	26
Tnrc6	247	210	214	142	181	178
Tnrc4	15	14	10	17	14	15
Tnrc15	28	21	29	21	25	25
Tnrc11	147	187	170	94	146	119
Tnr	14	16	19	15	18	18
Tnpo3	28	35	28	27	32	20
Tnpo2	23	19	23	19	20	22
Tnpo1	20	15	14	17	15	24
Tnp2	20	20	21	21	24	28
Tnp1	18	12	16	21	19	14
Tnnt3	17	19	22	21	24	21
Tnnt1	33	42	33	31	37	37
Tnni3k	19	19	17	15	17	21
Tnni3	22	31	28	40	39	26
Tnni2	116	92	101	125	130	164
Tnni1	20	19	22	18	18	21
Tnnc2	14	19	19	17	12	16
Tnnc1	147	177	175	251	234	104
Tnn	27	27	28	32	25	32
Tnmd	23	32	28	25	29	20
Tnks1bp1	51	40	52	38	40	40
Tnks	26	26	21	23	24	30
Tnip2	78	62	74	66	76	75
Tnip1	353	351	371	229	287	252
Tnfsf9	24	23	27	28	23	22
Tnfsf8	23	21	21	17	23	24
Tnfsf6	24	31	23	37	37	41
Tnfsf5ip1	175	199	195	230	192	211
Tnfsf5	17	21	16	17	14	15
Tnfsf4	20	15	10	11	18	15
Tnfsf18	18	13	14	12	11	14
Tnfsf15	16	15	16	17	13	19
Tnfsf14	34	35	40	37	51	40
Tnfsf13b	562	559	661	563	557	454
Tnfsf12-tnfsf13	30	23	24	32	26	21
Tnfsf12	17	11	16	12	18	16
Tnfsf11	21	28	20	33	29	19
Tnfsf10	51	43	40	56	62	69
Tnfrsf9	52	48	58	50	49	50
Tnfrsf8	18	18	18	17	17	17
Tnfrsf7	32	41	36	40	38	40
Tnfrsf5	81	70	84	97	86	77
Tnfrsf4	91	70	98	126	120	112
Tnfrsf26	56	41	51	42	43	52
Tnfrsf25	35	38	46	54	51	57
Tnfrsf23	13	11	14	13	13	10
Tnfrsf22	98	110	101	62	70	55
Tnfrsf21	197	172	165	150	173	167
Tnfrsf1b	22	22	28	18	19	24
Tnfrsf1a	56	57	53	54	47	43
Tnfrsf19l	44	39	54	44	38	41
Tnfrsf19	92	94	80	76	100	98
Tnfrsf18	63	50	51	58	72	74
Tnfrsf17	25	26	26	38	49	78
Tnfrsf14	20	14	14	16	18	16
Tnfrsf13c	68	61	61	50	68	59
Tnfrsf13b	18	28	20	22	20	19
Tnfrsf12a	94	66	78	152	143	133
Tnfrsf11b	47	43	42	46	36	40
Tnfrsf11a	35	36	33	30	33	32
Tnfrsf10b	110	159	154	154	153	186
Tnfaip8l3	15	12	17	17	15	15
Tnfaip8l2	135	132	134	145	166	199
Tnfaip8l1	17	21	24	18	19	26
Tnfaip8	253	211	213	302	290	338
Tnfaip6	19	19	23	17	15	13
Tnfaip3	118	80	104	102	79	99
Tnfaip2	347	410	423	257	333	324
Tnfaip1	1588	1697	1698	1125	1232	1121
Tnf	40	36	36	49	40	42
Tnc	88	50	77	84	73	69
Tmub1	77	88	77	69	86	80
Tmtc4	35	25	30	37	30	35
Tmsb4x	5647	4238	4272	6979	5895	6452
Tmsb10	2940	3052	3212	3235	3185	2859
Tmprss9	19	12	17	16	17	15
Tmprss8	17	18	24	22	20	26
Tmprss7	15	16	16	16	20	12
Tmprss6	21	22	19	24	21	26
Tmprss5	18	16	19	22	19	21
Tmprss4	118	93	88	110	113	82
Tmprss3	20	23	15	22	18	19
Tmprss2	393	423	410	429	394	442
Tmprss13	29	32	37	35	39	47
Tmprss11c	20	23	24	23	18	28
Tmprss11b	28	21	21	23	21	19
Tmprss11a	14	20	24	24	24	18
Tmpo	60	57	56	69	52	58
Tmpit	224	199	203	261	240	295
Tmod4	31	32	35	42	47	34
Tmod3	339	292	295	297	300	309
Tmod2	121	102	120	106	136	108
Tmod1	101	90	115	102	90	81
Tmlhe	14	11	12	16	15	13
Tmie	39	32	44	25	33	28
Tmepai	32	31	36	35	30	32
Tmem9b	458	472	449	585	465	481
Tmem98	175	165	197	164	150	150
Tmem92	14	16	10	17	17	12
Tmem90a	17	21	18	14	14	15
Tmem9	267	252	285	330	326	276
Tmem88	31	24	28	32	30	27
Tmem87a	36	33	31	50	46	47
Tmem86b	20	17	20	23	18	24
Tmem85	902	917	924	1240	1148	1204
Tmem81	39	42	41	33	36	30
Tmem8	81	69	74	69	68	66
Tmem77	486	438	440	782	475	645
Tmem74	17	16	17	19	16	16
Tmem66	1715	1895	1602	1635	1563	1508
Tmem65	458	399	429	454	480	446
Tmem63a	157	151	175	109	149	121
Tmem60	273	307	269	520	390	410
Tmem56	115	100	86	132	122	129
Tmem54	27	32	37	34	33	34
Tmem53	160	206	186	210	184	191
Tmem50a	1148	985	1251	994	1236	1326
Tmem5	247	212	240	341	274	288
Tmem49	684	666	625	1048	729	1066
Tmem47	37	34	37	40	37	36
Tmem46	42	43	33	52	43	33
Tmem45a	19	20	20	19	20	19
Tmem43	466	433	433	393	424	397
Tmem4	341	337	340	440	449	543
Tmem38b	504	515	511	692	537	634
Tmem35	28	30	27	34	27	29
Tmem34	25	24	30	30	23	34
Tmem32	94	74	85	84	89	102
Tmem30b	21	15	18	18	13	19
Tmem27	20	18	21	13	23	16
Tmem26	16	10	13	12	15	11
Tmem25	46	43	54	41	39	35
Tmem23	330	262	294	306	298	281
Tmem20	59	47	47	75	70	63
Tmem2	702	543	662	481	500	526
Tmem19	61	66	73	56	58	63
Tmem183a	121	102	119	123	137	139
Tmem18	19	19	18	20	17	19
Tmem176a	604	516	493	499	576	532
Tmem171	18	22	22	22	19	19
Tmem170	33	22	23	27	27	21
Tmem17	56	62	58	90	68	79
Tmem16g	22	20	21	20	21	20
Tmem16f	26	24	27	24	24	21
Tmem16d	16	15	17	17	16	14
Tmem16b	20	18	21	20	20	19
Tmem168	32	31	32	33	30	37
Tmem166	30	26	35	41	36	35
Tmem161a	24	32	36	33	31	29
Tmem160	722	665	684	842	873	828
Tmem151	15	13	18	13	15	20
Tmem150	126	142	141	129	128	105
Tmem15	213	193	192	204	188	198
Tmem14c	1190	1139	1189	1253	1515	1465
Tmem14a	20	16	13	21	18	15
Tmem143	43	41	40	50	48	49
Tmem141	88	88	66	132	97	134
Tmem136	25	28	27	24	35	29
Tmem134	180	177	186	219	201	218
Tmem126a	325	272	253	481	362	424
Tmem119	122	124	121	134	133	102
Tmem116	68	66	62	83	74	63
Tmem111	1110	1216	1229	1145	1094	1149
Tmem108	39	47	40	33	33	40
Tmem102	35	24	29	29	30	32
Tmem10	20	17	23	27	20	14
Tmeff2	16	16	17	16	15	18
Tmeff1	25	20	21	22	21	20
Tmed8	56	47	51	50	49	50
Tmed3	235	218	208	212	238	247
Tmed10	1092	958	966	877	861	825
Tmco5	17	18	20	21	20	17
Tmco4	92	83	102	78	89	77
Tmc7	46	43	40	54	48	52
Tmc6	112	139	136	149	147	157
Tmc5	29	30	29	25	30	36
Tmc4	149	177	163	128	122	124
Tmc3	11	12	10	12	16	14
Tmc2	19	16	18	16	21	22
Tmc1	24	20	21	28	24	25
Tmbim1	239	249	225	239	313	291
Tm9sf4	169	184	180	126	161	128
Tm9sf2	135	111	87	103	100	105
Tm9sf1	19	17	15	14	16	15
Tm7sf4	19	18	19	25	20	27
Tm6sf2	29	30	21	28	30	20
Tm6sf1	118	111	103	140	102	125
Tm4sf9	26	26	24	23	25	27
Tm4sf8	316	344	348	415	297	299
Tm4sf6	105	96	101	143	108	115
Tm4sf5	24	22	23	22	24	24
Tm4sf4	25	21	19	27	23	37
Tm4sf3	573	507	474	743	657	827
Tm4sf20	26	28	35	30	30	30
Tm4sf13	18	23	22	25	21	20
Tm4sf12	196	195	155	212	169	199
Tm4sf11	59	66	53	52	48	44
Tm4sf10	31	31	23	35	30	30
Tm4sf1	51	38	38	51	46	79
Tlx3	14	19	16	10	14	10
Tlx2	20	19	17	11	18	15
Tlx1	16	18	16	19	13	14
Tlr8	34	33	33	33	30	26
Tlr7	151	126	121	114	113	154
Tlr6	64	61	61	75	68	64
Tlr4	78	58	62	72	72	87
Tlr3	26	26	19	25	21	33
Tlr2	508	489	526	484	433	467
Tlr13	145	99	113	120	121	145
Tlr12	23	26	18	16	17	16
Tlr11	23	22	20	20	18	24
Tlr1	31	31	24	38	32	34
Tloc1	17	23	21	28	31	16
Tln2	12	13	11	11	15	13
Tln1	24	32	28	30	21	20
Tll2	17	23	19	24	18	21
Tll1	19	13	16	16	16	19
Tlk2	244	233	247	214	232	206
Tlk1	705	631	659	587	654	624
Tle6	204	240	225	241	233	250
Tle4	358	370	322	283	341	311
Tle3	22	23	21	22	15	15
Tle2	68	70	71	73	66	72
Tle1	241	201	223	190	212	217
Tlcd1	111	108	108	123	106	118
Tktl1	15	19	20	21	15	21
Tkt	988	992	845	788	878	873
Tk2	323	308	317	340	367	330
Tk1	61	67	62	66	66	58
Tjp3	45	37	54	43	53	33
Tjp2	337	430	431	254	319	291
Tjp1	103	126	113	84	127	125
Tjap1	91	105	121	75	93	78
Titf1	551	587	638	318	460	488
Tisp78	18	15	16	14	14	17
Tirap	71	73	75	66	65	63
Tipin	184	169	165	321	230	253
Tiparp	16	18	19	16	19	17
Tinf2	14	16	15	18	16	15
Tinagl	84	88	94	92	87	81
Tinag	120	128	129	99	114	132
Timp4	31	32	28	32	33	45
Timp3	1613	1909	1793	1534	1772	1443
Timp2	1459	1444	1218	909	1076	942
Timp1	255	292	300	334	299	257
Timm9	44	39	35	54	41	45
Timm8b	838	692	684	1105	975	1143
Timm8a2	15	16	19	19	19	24
Timm8a1	247	211	183	323	320	353
Timm50	148	183	175	176	140	154
Timm44	103	106	113	115	121	114
Timm23	20	19	18	17	21	20
Timm22	16	21	21	23	16	22
Timm17b	31	30	31	39	37	44
Timm17a	643	573	600	732	608	669
Timm13a	82	75	75	128	118	148
Timm10	342	338	342	467	466	447
Timeless	84	94	96	78	93	98
Timd4	23	23	22	23	24	25
Timd2	21	13	12	14	14	10
Tigd5	19	15	19	24	13	17
Tigd4	14	18	16	15	23	19
Tigd3	17	20	24	24	25	22
Tigd2	177	170	147	178	159	176
Tifp39	21	24	18	16	19	19
Tieg3	12	16	12	14	15	19
Tieg1	30	35	40	44	33	37
Tie1	115	131	156	95	112	88
Ticam2	44	57	61	47	49	53
Tiam2	27	28	23	24	21	20
Tiam1	210	272	223	175	202	183
Tial1	60	39	48	73	59	78
Tia1	38	34	38	45	51	42
Thyn1	504	437	452	602	517	546
Thy1	278	277	309	282	367	280
Thumpd3	111	111	117	108	103	111
Thumpd1	153	142	145	144	147	140
Thtpa	179	180	192	199	188	157
Thsd7b	20	19	19	17	15	18
Thsd6	40	43	49	53	53	46
Thsd4	64	71	67	41	56	44
Thsd1	79	83	93	73	97	71
Thrsp	50	37	39	38	43	41
Thrb	18	15	15	15	14	14
Thrap6	472	441	459	736	619	633
Thrap5	156	150	138	127	154	125
Thrap4	173	201	189	127	181	145
Thrap3	14	12	15	14	14	13
Thrap2	24	24	29	21	31	29
Thrap1	23	19	22	16	23	28
Thra	93	92	102	66	78	58
Thop1	72	70	67	69	61	64
Thoc6	93	91	87	128	123	123
Thoc4	466	452	468	606	583	600
Thoc3	65	62	57	80	68	61
Thoc1	89	104	106	155	101	126
Thnsl2	60	53	54	67	66	66
Thnsl1	35	31	27	39	33	33
Thhl1	18	32	27	29	30	18
Thg1l	34	26	33	37	32	30
Them5	22	21	22	19	19	22
Them2	665	690	573	878	929	960
Theg	31	24	38	29	32	33
Thbs4	8	12	14	12	20	15
Thbs3	69	76	80	61	72	67
Thbs2	25	22	21	19	20	22
Thbs1	36	32	31	28	31	24
Thbd	600	603	539	442	612	511
Thap7	126	147	132	145	161	139
Thap4	184	177	210	164	169	178
Thap11	429	460	472	479	467	410
Thap1	29	26	27	32	27	32
Thada	20	13	13	15	19	18
Th1l	115	107	106	115	118	108
Th	12	13	16	13	11	15
Tgtp	22	20	23	18	20	17
Tgoln1	205	187	180	188	152	158
Tgn	19	18	17	18	18	25
Tgm6	14	18	17	21	17	15
Tgm5	18	15	15	18	16	16
Tgm4	20	20	18	21	23	16
Tgm3	16	13	15	12	15	17
Tgm2	2382	2892	2607	1752	2294	1885
Tgm1	39	42	45	47	49	37
Tgifx1	16	11	16	17	21	19
Tgif2	13	15	21	16	17	19
Tgif	93	79	105	81	81	81
Tgfbr3	203	184	177	161	238	178
Tgfbr2	2276	2222	2208	1568	2016	1673
Tgfbr1	1034	759	820	899	861	905
Tgfbi	1243	1067	1318	986	1049	804
Tgfb3	115	122	127	117	102	100
Tgfb2	71	78	67	64	62	58
Tgfb1i4	299	441	434	529	281	329
Tgfb1i1	193	218	217	143	183	152
Tgfb1	132	140	128	88	99	80
Tgfa	19	21	17	18	20	17
Tfrc	442	351	382	492	498	542
Tfpt	107	115	119	125	113	118
Tfpi2	13	14	17	14	18	12
Tfpi	39	41	47	57	54	49
Tfip11	111	112	115	98	116	100
Tfg	300	341	319	270	293	259
Tff3	14	20	17	18	15	15
Tff2	374	500	419	303	433	884
Tff1	18	17	19	24	20	16
Tfdp1	148	124	128	138	120	131
Tfb2m	121	107	125	136	122	136
Tfb1m	55	51	49	58	55	65
Tfam	115	100	95	144	147	150
Tex9	57	51	44	74	53	67
Tex292	110	126	127	118	140	115
Tex27	914	958	868	788	824	808
Tex264	346	450	505	410	403	345
Tex261	548	636	579	598	567	614
Tex24	20	16	14	13	14	17
Tex21	14	17	18	17	18	18
Tex2	99	83	87	80	82	98
Tex19	18	20	19	23	19	16
Tex16	20	17	18	19	15	21
Tex15	9	9	12	14	10	13
Tex14	20	20	20	24	20	22
Tex13	20	22	21	23	16	19
Tex12	12	14	11	19	15	13
Tex11	52	47	55	74	62	75
Tex101	21	26	23	25	18	24
Tex10	53	58	51	56	56	51
Tessp3	18	15	17	18	15	25
Tessp2	31	24	27	35	25	28
Tesp2	16	17	16	15	17	16
Tesp1	18	17	21	17	15	18
Tesk2	13	12	14	18	17	18
Tesk1	156	225	224	116	163	158
Tesc	25	31	27	28	24	21
Tes3	47	46	52	58	58	63
Tes	639	592	615	716	610	631
Tert	16	17	13	13	14	9
Terf2ip	202	190	189	195	218	225
Terf2	101	92	108	69	82	78
Terf1	12	17	17	15	15	11
Tera	17	11	16	14	15	14
Tep1	22	22	23	21	21	24
Tenr	12	15	15	18	18	15
Tenc1	44	53	48	34	38	28
Tekt3	16	18	17	14	17	17
Tekt1	147	185	173	127	164	182
Tek	946	676	633	571	652	571
Tegt	5477	6703	6514	4272	5267	4397
Tef	370	439	447	377	401	401
Tectb	19	15	18	17	14	20
Tecta	18	18	15	15	18	18
Tec	60	76	68	71	58	77
Tebp	153	152	142	184	169	220
Tead4	31	27	32	31	32	29
Tead3	18	19	16	16	15	20
Tead2	122	99	117	108	94	81
Tead1	14	13	16	13	12	18
Tdrkh	27	24	30	29	35	30
Tdrd7	461	486	522	417	423	414
Tdrd6	15	15	15	17	17	21
Tdrd3	122	104	102	126	128	133
Tdrd1	26	20	29	32	24	22
Tdpoz5	15	19	15	16	15	17
Tdpoz4	27	21	28	23	21	20
Tdpoz3	17	18	19	16	18	20
Tdpoz2	31	37	40	37	33	35
Tdpoz1	16	17	20	19	18	22
Tdo2	16	18	20	17	17	15
Tdh	9	15	12	15	14	13
Tdgf1	14	19	23	18	19	16
Tdg	31	32	31	32	30	28
Tctex1	20	16	19	20	24	27
Tcte3	38	38	37	58	52	55
Tcte1l	755	647	726	980	843	1051
Tcta	25	25	27	29	21	29
Tcstv3	15	17	13	15	19	15
Tcstv1	20	17	20	24	21	21
Tcp11l1	20	18	15	14	14	16
Tcp11	27	35	29	34	29	37
Tcp10a	17	17	15	16	13	17
Tcp1	452	462	422	365	342	388
Tcof1	63	75	102	43	58	61
Tcn2	257	224	172	177	192	164
Tcl1b5	14	16	16	17	13	14
Tcl1b4	15	15	18	20	15	26
Tcl1b3	25	17	13	19	21	17
Tcl1b2	20	19	22	17	18	17
Tcl1b1	15	14	13	15	11	13
Tcl1	14	15	12	16	16	15
Tcirg1	274	268	320	312	307	370
Tcfl5	18	10	12	12	14	11
Tcfl4	31	28	33	37	30	36
Tcfl1	42	48	44	53	45	43
Tcfec	19	20	19	13	24	24
Tcfeb	17	18	20	15	17	18
Tcfe3	63	78	88	47	66	66
Tcfcp2l3	66	69	55	60	61	57
Tcfcp2l2	47	42	47	41	53	55
Tcfcp2	30	35	32	38	27	37
Tcfap4	29	22	22	31	23	21
Tcfap2e	20	24	17	22	23	26
Tcfap2d	11	13	13	17	14	16
Tcfap2c	19	17	18	22	20	22
Tcfap2b	19	20	20	24	17	22
Tcfap2a	14	19	22	24	21	17
Tcf7l2	108	107	110	83	83	91
Tcf7	47	36	38	29	37	27
Tcf4	1262	1222	1094	977	1036	986
Tcf3	251	320	266	145	179	156
Tcf25	728	794	775	669	634	597
Tcf23	22	28	22	25	23	18
Tcf21	440	416	410	503	476	418
Tcf20	37	43	39	50	41	46
Tcf2	25	32	28	23	20	25
Tcf19	56	70	60	57	51	44
Tcf15	19	17	13	15	19	16
Tcf12	50	35	47	41	38	38
Tcf1	26	28	32	41	36	29
Tcerg1l	16	17	16	17	20	18
Tcerg1	20	23	22	18	16	25
Tceb3bp1	34	34	31	31	37	32
Tceb3	102	81	88	80	92	81
Tceb2	1828	1733	1861	2121	1902	1946
Tceb1	127	127	129	222	154	166
Tceal8	279	268	280	479	334	377
Tceal6	18	22	16	20	23	17
Tceal5	22	19	18	19	15	15
Tceal3	19	17	18	17	18	16
Tceal1	82	86	81	118	95	83
Tcea3	149	132	151	158	178	150
Tcea2	88	83	93	102	86	84
Tcea1	9	10	10	7	10	13
Tcba1	26	32	30	28	29	25
Tcap	121	146	142	200	187	83
Tcam1	19	14	17	21	21	21
Tbxas1	167	166	155	135	179	202
Tbxa2r	52	41	49	40	36	33
Tbx6	29	30	30	29	27	28
Tbx5	28	23	17	21	20	21
Tbx4	45	57	53	46	43	28
Tbx3	449	455	416	323	367	258
Tbx22	21	20	23	19	25	20
Tbx21	16	18	20	15	24	19
Tbx20	20	20	20	19	19	22
Tbx2	132	174	138	116	131	114
Tbx19	10	15	11	11	23	15
Tbx18	20	14	18	17	18	16
Tbx15	18	15	17	22	23	17
Tbx10	15	16	19	18	16	15
Tbx1	57	72	60	56	56	65
Tbrg4	82	98	101	85	102	99
Tbrg1	357	435	367	419	314	343
Tbr1	19	19	18	20	18	17
Tbpl1	18	15	13	15	17	17
Tbp	69	63	75	85	74	80
Tbn	29	22	18	21	23	21
Tbl3	47	42	48	41	46	50
Tbl2	59	75	75	60	65	55
Tbl1xr1	22	18	16	19	25	19
Tbl1x	134	116	130	123	136	118
Tbkbp1	27	21	26	19	24	21
Tbk1	477	442	456	451	497	489
Tbcd	156	161	168	145	163	151
Tbcc	19	20	20	20	17	22
Tbca	2785	2616	2689	4238	3629	4064
Tbc1d9	61	53	68	44	39	51
Tbc1d8b	26	27	38	29	32	17
Tbc1d8	43	55	52	33	37	42
Tbc1d7	153	154	161	147	141	149
Tbc1d5	154	154	172	103	136	125
Tbc1d4	17	14	17	19	17	17
Tbc1d2b	271	242	275	189	200	166
Tbc1d23	112	80	91	106	86	102
Tbc1d17	132	147	134	116	121	115
Tbc1d16	16	18	18	15	19	14
Tbc1d15	224	191	216	210	187	189
Tbc1d13	162	159	161	155	143	128
Tbc1d12	14	19	18	20	20	26
Tbc1d10c	324	355	335	297	343	228
Tbc1d10b	32	34	32	32	36	38
Tbc1d10a	66	59	58	80	68	74
Tbc1d1	41	44	45	38	41	37
Taz	274	240	275	293	272	292
Tax1bp3	1789	1497	1568	1653	1656	1727
Tax1bp1	695	608	507	499	512	552
Tatdn2	69	47	53	61	59	59
Tatdn1	25	27	26	30	25	20
Tat	11	8	11	7	10	12
Tas2r144	12	19	18	22	19	20
Tas2r143	14	15	17	18	16	16
Tas2r140	17	17	14	18	18	17
Tas2r139	10	9	11	8	9	11
Tas2r137	16	20	19	19	14	14
Tas2r136	17	12	17	17	16	14
Tas2r135	14	16	15	18	18	15
Tas2r134	15	14	13	16	12	15
Tas2r131	15	16	15	19	17	20
Tas2r130	20	17	16	17	19	16
Tas2r129	9	11	16	16	17	15
Tas2r126	20	21	19	23	26	30
Tas2r125	13	16	13	16	14	9
Tas2r124	18	19	23	15	21	25
Tas2r123	13	12	10	14	6	9
Tas2r121	12	12	9	10	16	10
Tas2r120	20	17	20	19	13	13
Tas2r119	13	16	15	14	16	13
Tas2r118	16	15	16	12	17	18
Tas2r117	14	15	17	20	15	15
Tas2r116	18	15	16	12	12	14
Tas2r115	12	16	13	9	14	12
Tas2r114	17	17	15	15	15	26
Tas2r113	12	17	15	16	16	10
Tas2r110	13	12	12	15	15	12
Tas2r109	13	13	13	13	13	14
Tas2r108	11	13	11	14	15	15
Tas2r107	15	18	19	20	19	25
Tas2r106	18	16	15	16	17	19
Tas2r105	18	18	18	23	25	24
Tas2r104	19	13	14	14	16	21
Tas2r102	11	11	8	14	9	15
Tas1r3	20	21	20	13	21	26
Tas1r2	18	15	19	16	19	17
Tas1r1	15	11	13	15	18	19
Tars	48	44	57	52	51	46
Tardbp	88	94	87	106	113	114
Tarbp2	45	50	48	52	56	53
Tapbpl	135	156	156	148	169	148
Tapbp	78	146	131	104	106	94
Tap2	409	490	452	354	506	434
Tap1	57	78	68	64	104	69
Tank	162	154	155	210	161	177
Taldo1	1872	1776	1939	1815	1864	1772
Tal2	16	17	18	21	18	24
Tal1	38	38	42	43	45	38
Tagln3	17	18	22	21	19	21
Tagln	47	43	45	52	53	55
Tagap	312	320	304	316	288	353
Taf9b	370	352	361	347	414	377
Taf9	85	84	96	133	101	122
Taf7l	10	10	8	11	12	7
Taf7	14	13	10	16	18	14
Taf6l	19	17	15	17	25	16
Taf6	52	71	64	56	60	65
Taf5l	43	44	61	61	55	50
Taf5	35	38	38	45	45	51
Taf4a	22	21	16	22	19	19
Taf3	35	44	31	27	31	34
Taf1c	19	20	21	18	19	19
Taf1b	11	16	17	11	15	10
Taf15	87	46	65	61	73	70
Taf13	146	161	158	197	166	219
Taf12	163	159	183	189	160	188
Taf11	79	94	90	106	95	86
Taf10	560	589	613	726	676	734
Tada3l	41	49	54	40	53	38
Tada2l	27	35	27	31	40	32
Tacstd2	666	751	731	666	741	724
Tacr3	19	20	15	21	19	17
Tacr2	24	23	23	24	23	21
Tacr1	21	23	31	23	30	26
Tacc3	22	23	22	19	24	20
Tacc2	19	22	22	18	23	18
Tacc1	289	299	317	238	246	253
Tac4	15	16	11	13	19	17
Tac2	19	24	15	12	18	17
Tac1	20	19	15	17	14	14
Taar9	15	15	24	20	18	15
Taar8c	11	13	16	13	19	16
Taar8b	17	14	14	13	12	11
Taar8a	19	15	20	21	19	19
Taar7f	16	13	17	14	14	14
Taar7e	20	12	13	12	15	16
Taar7d	16	14	18	14	18	19
Taar7b	30	20	20	22	30	18
Taar7a	22	22	19	19	19	17
Taar6	16	15	19	16	15	18
Taar5	13	20	17	16	16	15
Taar4	26	17	23	27	25	26
Taar3	28	41	40	30	33	33
Taar2	12	9	10	14	12	9
T2bp	29	21	24	28	24	25
T2	18	20	20	13	23	14
T	18	16	17	23	17	20
Syvn1	781	915	936	535	797	716
Sytl5	22	22	19	21	17	25
Sytl4	47	46	37	54	47	47
Sytl3	21	31	29	28	26	26
Sytl2	201	177	168	175	175	162
Sytl1	47	40	52	62	64	55
Syt9	26	30	24	33	33	25
Syt8	15	19	10	14	21	17
Syt7	19	19	19	19	13	17
Syt6	16	13	16	12	18	12
Syt5	44	44	42	45	48	46
Syt4	15	14	17	20	16	17
Syt3	20	20	16	18	14	22
Syt2	16	14	11	15	15	13
Syt15	25	24	26	17	20	18
Syt14l	15	13	16	19	17	15
Syt14	14	15	14	17	12	10
Syt13	20	16	20	15	18	20
Syt12	21	13	22	18	19	21
Syt11	276	313	330	234	243	200
Syt10	17	15	16	12	17	14
Syt1	24	22	15	18	17	20
Sypl	1246	1137	1131	1246	1027	1072
Syp	71	73	58	83	76	70
Synpr	12	9	10	7	17	12
Synpo2l	20	23	23	28	21	21
Synpo2	14	14	15	18	14	14
Synj2bp	143	170	144	210	138	171
Synj2	14	9	8	11	12	16
Syngr4	16	20	20	17	25	22
Syngr3	17	21	15	16	21	18
Syngr2	171	245	217	178	153	157
Syngr1	185	161	209	248	221	268
Syne1	25	25	27	22	25	27
Syncrip	33	36	33	31	33	41
Sync	12	17	14	18	17	14
Syn3	20	17	20	22	21	21
Syn2	63	52	75	65	64	55
Syn1	31	34	28	20	26	21
Syk	12	18	17	18	14	26
Syf2	649	737	750	752	692	673
Sycp3	13	12	15	13	14	11
Sycp1	17	16	17	17	17	13
[truncated: 16,121 more rows]

## Sheet: DEGs of COPD
geneNames	logFC	AveExpr	t	P.Value	adj.P.Val	B
Ccl8	1.78502	8.07752	12.7117	3.13e-07	0.00567061	6.48852
LOC620078	1.38154	5.43499	9.86325	2.91e-06	0.0128586	4.82646
Csprs	1.38493	6.19014	9.74791	3.22e-06	0.0128586	4.74516
Col4a2	-1.33689	9.70696	-9.73463	3.26e-06	0.0128586	4.73572
BC065120	-1.22689	7.08754	-9.6395	3.55e-06	0.0128586	4.66759
Abp1	0.981416	7.70269	8.89644	7.04e-06	0.0192249	4.10425
Atbf1	-1.32632	8.4606	-8.72188	8.33e-06	0.0192249	3.96347
Insl6	1.12164	6.71437	8.59681	9.41e-06	0.0192249	3.86052
Nav1	-1.01793	7.87095	-8.58173	9.55e-06	0.0192249	3.84799
Car3	-1.51484	6.07905	-8.24435	1.34e-05	0.0220577	3.56072
Gzmk	1.0615	4.94335	8.23646	1.35e-05	0.0220577	3.55384
S100a4	0.937168	6.18666	8.15712	1.46e-05	0.0220577	3.48426
Ifitm6	0.934101	6.26328	7.97346	1.77e-05	0.0246028	3.32024
Prg2	2.36637	6.46397	7.68103	2.4e-05	0.0278725	3.05037
D1Bwg0491e	-0.975432	6.12984	-7.64398	2.5e-05	0.0278725	3.0154
Srp9	0.849873	8.73128	7.63072	2.54e-05	0.0278725	3.00284
Nfix	-1.03101	8.28712	-7.60212	2.61e-05	0.0278725	2.97568
5133400G04Rik	0.823127	8.01124	7.41376	3.21e-05	0.0296464	2.79403
Apbb2	-0.787718	6.88518	-7.39831	3.26e-05	0.0296464	2.77893
Ly96	0.869444	8.01581	7.39619	3.27e-05	0.0296464	2.77684
Sdk1	-0.880243	4.91629	-7.28726	3.69e-05	0.0303182	2.66937
1200009O22Rik	-0.862748	7.26832	-7.22063	3.98e-05	0.0303182	2.60282
2010001M09Rik	1.70621	8.97784	7.20254	4.06e-05	0.0303182	2.58466
Eef2	-0.997029	8.58048	-7.17818	4.17e-05	0.0303182	2.56011
Sdro	-0.833731	4.18612	-7.03271	4.92e-05	0.0303182	2.41183
Mrps28	0.7467	8.39937	6.95665	5.36e-05	0.0303182	2.33311
Eln	-0.852417	7.35481	-6.9263	5.55e-05	0.0303182	2.30146
Polb	0.830478	5.77074	6.893	5.77e-05	0.0303182	2.26659
Gm1673	0.7496	6.38854	6.86994	5.93e-05	0.0303182	2.24236
Lsm7	0.781748	8.71201	6.83686	6.16e-05	0.0303182	2.20744
1110058L19Rik	0.773498	8.71219	6.80185	6.42e-05	0.0303182	2.17033
Cxcl13	0.7349	8.20009	6.79859	6.44e-05	0.0303182	2.16686
Oosp1	2.42601	5.3248	6.75587	6.77e-05	0.0303182	2.1213
AI450948	-0.869324	7.39155	-6.72358	7.03e-05	0.0303182	2.08669
Agrp	0.725634	6.74868	6.72253	7.04e-05	0.0303182	2.08557
Fhit	0.766835	5.91408	6.70656	7.18e-05	0.0303182	2.06839
Pfdn4	0.792766	9.12359	6.67163	7.48e-05	0.0303182	2.03069
Glg1	-0.884568	9.81332	-6.63626	7.8e-05	0.0303182	1.99232
Lamc1	-0.931293	7.45676	-6.59766	8.17e-05	0.0303182	1.95024
Lsm8	0.768562	8.68876	6.59601	8.18e-05	0.0303182	1.94844
D930038M13Rik	-0.859855	6.20082	-6.59509	8.19e-05	0.0303182	1.94744
Fpr-rs2	1.26818	8.53699	6.59461	8.2e-05	0.0303182	1.94692
Ptprf	-0.83198	7.07592	-6.58875	8.25e-05	0.0303182	1.9405
Col4a3	-0.872897	6.67302	-6.54708	8.68e-05	0.0303182	1.89477
Plec1	-1.05541	10.094	-6.53645	8.79e-05	0.0303182	1.88306
3110040N11Rik	0.819811	7.36344	6.49443	9.24e-05	0.0303182	1.83662
Magmas	0.73967	7.51379	6.48344	9.37e-05	0.0303182	1.82443
Ncoa6	-0.767719	5.86198	-6.48126	9.39e-05	0.0303182	1.82201
Dpm3	0.703968	8.4921	6.47644	9.45e-05	0.0303182	1.81666
Ccl12	0.979106	7.92314	6.45547	9.69e-05	0.0303182	1.79332
1500002I11Rik	0.825643	7.66624	6.45019	9.75e-05	0.0303182	1.78743
Pigt	-0.877287	5.47742	-6.44749	9.78e-05	0.0303182	1.78442
Col6a2	-0.873874	6.91176	-6.44074	9.86e-05	0.0303182	1.77689
Tsc2	-0.830775	9.33432	-6.43663	9.91e-05	0.0303182	1.7723
Fcer2a	-0.858955	6.73086	-6.41923	0.000101236	0.0303182	1.75283
1700024G13Rik	0.850262	7.11681	6.39086	0.00010479	0.0303182	1.721
Myh11	-0.844386	7.40255	-6.3837	0.000105709	0.0303182	1.71295
H2-M2	1.26794	8.76634	6.34902	0.000110283	0.0303182	1.67383
6720430O15	-0.968853	5.96255	-6.33304	0.000112463	0.0303182	1.65574
Gdf3	1.12339	5.05672	6.32866	0.000113068	0.0303182	1.65078
Cd52	0.69536	11.172	6.31697	0.000114703	0.0303182	1.63751
Gsn	-1.23328	8.01877	-6.30967	0.000115736	0.0303182	1.62922
Unc5b	-0.828066	5.72736	-6.29948	0.000117194	0.0303182	1.61763
3110004H13Rik	0.807026	7.19044	6.27448	0.000120859	0.0303182	1.58912
1110020A09Rik	0.714828	6.70716	6.26481	0.000122309	0.0303182	1.57807
LOC228715	0.77529	8.31833	6.2604	0.000122978	0.0303182	1.57302
C730025P13Rik	0.69266	6.92941	6.24864	0.000124778	0.0303182	1.55956
1700027A23Rik	0.767795	7.33342	6.23216	0.000127349	0.0303182	1.54065
Msn	-0.888602	8.80724	-6.23045	0.000127619	0.0303182	1.53869
Plekhg2	-0.856098	7.72609	-6.2282	0.000127975	0.0303182	1.5361
2310007A19Rik	0.840807	9.26595	6.21861	0.000129505	0.0303182	1.52507
Col6a1	-0.753468	9.66179	-6.21793	0.000129616	0.0303182	1.52428
Sh2d1a	0.748396	5.21013	6.20287	0.000132061	0.0303182	1.50694
Ndufa5	0.729184	9.94228	6.19623	0.000133157	0.0303182	1.49927
Cbfa2t3h	-0.978715	7.33394	-6.18907	0.000134348	0.0303182	1.491
Polydom	-0.664039	6.62928	-6.18135	0.000135645	0.0303182	1.48208
Prelp	-0.878818	11.0307	-6.16783	0.00013795	0.0303182	1.46643
Dctn1	-1.43038	5.07812	-6.16483	0.000138466	0.0303182	1.46295
Agtrl1	-0.893488	6.23661	-6.16093	0.000139142	0.0303182	1.45843
Pdcd10	0.711877	7.81217	6.16075	0.000139173	0.0303182	1.45822
AF067061	0.763665	3.83727	6.15603	0.000139996	0.0303182	1.45274
Tomm7	0.671875	9.61655	6.12443	0.000145639	0.0303182	1.416
Lst1	0.793677	7.80611	6.11922	0.000146592	0.0303182	1.40992
1700029P11Rik	0.680376	7.71161	6.11784	0.000146846	0.0303182	1.40831
4931431L11Rik	0.67117	7.41844	6.10994	0.00014831	0.0303182	1.39908
Timm13a	0.758969	6.65121	6.08301	0.000153413	0.0303182	1.36758
Hbb-b1	1.27361	9.91261	6.07991	0.000154012	0.0303182	1.36395
MTERF	0.649601	7.49735	6.0768	0.000154616	0.0303182	1.3603
Hyal1	-0.761516	6.01712	-6.07488	0.000154991	0.0303182	1.35805
Igsf3	-0.711801	6.26736	-6.0735	0.00015526	0.0303182	1.35643
Sult1d1	0.869513	6.11945	6.06638	0.000156659	0.0303182	1.34807
Dab2ip	-0.782285	8.13923	-6.06078	0.000157769	0.0303182	1.34149
Zfpm1	-0.781312	8.05864	-6.04389	0.000161169	0.0303182	1.32161
Stard6	0.72495	5.26772	6.04377	0.000161194	0.0303182	1.32146
2810410M20Rik	0.660256	9.46926	6.04299	0.000161352	0.0303182	1.32055
2010012C16Rik	0.932651	5.56204	6.03392	0.000163212	0.0303182	1.30986
Zcchc14	-0.707801	6.94303	-6.03079	0.000163861	0.0303182	1.30616
Egr1	-0.863448	9.53516	-6.00996	0.000168241	0.0303182	1.28154
1110019L22Rik	-0.911689	6.78402	-6.00421	0.000169472	0.0303182	1.27473
2310045B01Rik	0.651547	7.33941	6.00157	0.000170041	0.0303182	1.2716
1810037G04Rik	0.64244	6.79068	5.99409	0.000171663	0.0303182	1.26273
Cxcl12	-0.708839	10.6512	-5.99152	0.000172223	0.0303182	1.25969
Gm561	0.784134	8.20628	5.98694	0.000173228	0.0303182	1.25425
Col16a1	-0.744954	8.03925	-5.98339	0.000174012	0.0303182	1.25004
Rpl13a	0.650502	8.72593	5.96958	0.000177097	0.0305618	1.23362
Col18a1	-0.949495	8.57708	-5.95236	0.000181025	0.030568	1.2131
Ppil3	0.725451	8.35927	5.9485	0.000181919	0.030568	1.2085
EG638695	0.827414	5.66345	5.94732	0.000182193	0.030568	1.20709
Irs2	-0.839127	7.07484	-5.92613	0.000187193	0.0308614	1.18176
Ubap2l	-0.66286	6.5709	-5.92362	0.000187795	0.0308614	1.17875
2610018L09Rik	0.644981	8.49865	5.91841	0.000189052	0.0308614	1.17251
2410005K17Rik	0.63253	8.58539	5.89748	0.000194191	0.0314173	1.1474
Tnfrsf12a	0.859565	6.72458	5.86778	0.000201743	0.0316755	1.11165
Plvap	-0.64216	10.3091	-5.84746	0.000207096	0.0316755	1.08709
Efna5	-0.679489	6.52257	-5.84067	0.000208916	0.0316755	1.07888
Tpcn1	-0.677863	8.30148	-5.83643	0.000210064	0.0316755	1.07374
Fut2	-0.667804	4.10316	-5.82961	0.000211922	0.0316755	1.06548
Slco2a1	-0.977427	9.76401	-5.81577	0.000215747	0.0316755	1.04869
Ncor1	-0.730127	7.40234	-5.81501	0.000215961	0.0316755	1.04776
Gm1574	0.707446	6.86031	5.80712	0.000218178	0.0316755	1.03817
Ian3	0.672689	6.64836	5.80592	0.000218518	0.0316755	1.03671
Lmnb1	-0.813936	6.62796	-5.80378	0.000219123	0.0316755	1.03411
Med6	0.65776	8.20597	5.80064	0.000220017	0.0316755	1.03029
Tcf3	-0.799876	7.71631	-5.79917	0.000220435	0.0316755	1.0285
Mmp2	-0.816452	9.78538	-5.79162	0.000222605	0.0316755	1.0193
Lamc2	-0.684692	7.24591	-5.78303	0.0002251	0.0316755	1.00883
Col4a1	-0.77929	10.1718	-5.77669	0.00022696	0.0316755	1.0011
Tpt1	0.666067	5.43068	5.76587	0.000230177	0.0316755	0.987868
Pigf	0.813543	7.07109	5.76238	0.000231225	0.0316755	0.983599
Fgf22	-0.800663	5.19938	-5.75872	0.000232326	0.0316755	0.97913
Ndufa4	0.632365	11.4432	5.75401	0.000233757	0.0316755	0.973358
Ppap2b	-0.738836	10.5461	-5.75279	0.000234127	0.0316755	0.971869
Ccdc58	0.653382	7.74708	5.74118	0.000237697	0.0316755	0.957635
C230075L19Rik	-0.736651	8.66492	-5.73899	0.000238378	0.0316755	0.954943
4833420K19Rik	0.708545	8.07614	5.72601	0.000242449	0.0316755	0.93901
Tnfrsf22	-0.729814	6.31985	-5.72533	0.000242667	0.0316755	0.938165
Eif3s8	-0.826704	6.97226	-5.71665	0.000245435	0.0316755	0.927489
1700012B09Rik	0.63166	5.29868	5.70467	0.00024931	0.0316755	0.912744
Ltbp3	-0.730873	8.33962	-5.69607	0.000252136	0.0316755	0.902127
Dmkn	0.828586	9.07476	5.69366	0.000252931	0.0316755	0.899161
Serf1	0.69199	6.68534	5.69102	0.000253808	0.0316755	0.895902
Sec61b	0.652695	8.99662	5.68672	0.000255245	0.0316755	0.890584
Chchd4	0.661652	7.40004	5.68662	0.000255276	0.0316755	0.890467
Mmrn2	-0.688772	8.35198	-5.68537	0.000255696	0.0316755	0.88892
Hnrpa1	-0.791508	7.527	-5.68523	0.000255744	0.0316755	0.888745
Mfn2	-0.671703	9.01498	-5.67708	0.000258492	0.0316755	0.878674
4732495E13Rik	-0.641735	10.1629	-5.67615	0.000258808	0.0316755	0.877522
Efcab1	0.774917	7.37747	5.67344	0.000259732	0.0316755	0.874161
5830434P21Rik	-0.863751	8.99018	-5.66636	0.000262158	0.0316755	0.865401
Elmo1	-0.718374	8.44436	-5.6662	0.000262215	0.0316755	0.865196
Rxra	-0.732449	4.7047	-5.64927	0.000268118	0.032054	0.844204
BC060615	-1.04311	6.21122	-5.64249	0.000270524	0.032054	0.835779
Cutl1	-0.645929	7.1682	-5.63991	0.000271446	0.032054	0.832573
Sell	-0.663326	7.28962	-5.63703	0.000272478	0.032054	0.828991
Flt1	-0.743953	9.62992	-5.60788	0.000283168	0.032054	0.792676
Ndufb3	0.669904	9.23503	5.60464	0.000284385	0.032054	0.788627
AW555464	-0.737719	8.10499	-5.60351	0.000284812	0.032054	0.787211
Surb7	0.785778	7.86047	5.59723	0.000287187	0.032054	0.779369
Gna12	-0.799097	5.24294	-5.58873	0.000290437	0.032054	0.768741
LOC381633	0.645113	6.15501	5.58818	0.000290652	0.032054	0.768044
Klf7	-0.627996	8.90418	-5.58662	0.000291254	0.032054	0.766089
Bola3	0.704779	8.8467	5.58596	0.000291506	0.032054	0.765271
Mylk	-0.602809	8.89403	-5.58499	0.000291882	0.032054	0.764054
Bcl9l	-0.990777	6.88423	-5.58474	0.00029198	0.032054	0.763738
Vim	-0.638867	10.4612	-5.57835	0.000294464	0.032054	0.755736
Mrps6	0.599601	7.87145	5.5783	0.000294485	0.032054	0.755669
Col5a1	-0.853604	7.71977	-5.56816	0.000298474	0.032054	0.742954
0610009B22Rik	0.804621	6.93488	5.56727	0.000298824	0.032054	0.741845
Polr2k	0.853843	5.86568	5.56694	0.000298958	0.032054	0.741421
BC039093	-0.756771	8.61355	-5.55396	0.000304159	0.0324197	0.725122
Mrps18c	0.694314	8.89256	5.53874	0.000310384	0.0326237	0.705964
Cdh5	-0.771268	7.53866	-5.52786	0.000314914	0.0326237	0.692259
1700083M11Rik	0.723283	5.03761	5.51608	0.000319906	0.0326237	0.67738
Magoh	0.638555	7.60752	5.50882	0.000323022	0.0326237	0.668205
Klf13	-0.759506	7.76652	-5.50693	0.000323839	0.0326237	0.665814
LOC239102	-0.714196	6.12914	-5.50201	0.000325977	0.0326237	0.659587
1600002K03Rik	0.657952	8.0198	5.49805	0.000327708	0.0326237	0.654574
Zyx	-0.716296	11.2571	-5.49278	0.000330027	0.0326237	0.647898
2310056P07Rik	0.653923	8.74976	5.49265	0.000330081	0.0326237	0.647742
Orc6l	0.680308	7.71152	5.48765	0.000332299	0.0326237	0.641403
1810007E14Rik	0.835139	6.33755	5.48742	0.000332401	0.0326237	0.641112
1700025K23Rik	0.624032	6.74191	5.48693	0.000332621	0.0326237	0.640485
Hist1h4k	0.669903	5.36181	5.48349	0.000334157	0.0326237	0.636123
Gng2	0.700173	7.16704	5.48193	0.000334858	0.0326237	0.634137
2900064A13Rik	0.673577	6.63217	5.48013	0.000335665	0.0326237	0.631856
Depdc6	-0.58481	6.54	-5.47799	0.000336629	0.0326237	0.629142
Pla2g1b	-0.749483	8.35632	-5.475	0.000337981	0.0326237	0.625344
Notch4	-0.677615	9.55155	-5.4739	0.00033848	0.0326237	0.623948
BC017647	-0.700726	7.40791	-5.4632	0.000343376	0.0326502	0.610342
Cox17	0.659923	10.5276	5.45561	0.000346891	0.0326502	0.600691
LOC329575	0.850993	6.76502	5.45397	0.000347659	0.0326502	0.598594
2310005N03Rik	0.696302	7.61131	5.4527	0.000348253	0.0326502	0.596978
Mtap6	-0.765902	5.32138	-5.44996	0.000349535	0.0326502	0.593494
Il6ra	-0.642449	5.33178	-5.4499	0.000349566	0.0326502	0.593411
Rps27a	0.728777	8.65131	5.44195	0.000353326	0.0327725	0.58327
Ptpn18	0.647444	7.78976	5.43691	0.000355728	0.0327725	0.576845
2810021O14Rik	0.656063	9.08844	5.43342	0.000357402	0.0327725	0.572393
Pitpnm2	-0.840572	7.65931	-5.42969	0.000359203	0.0327725	0.567627
Zc3hdc3	-0.662133	6.4486	-5.42181	0.00036304	0.0327725	0.55755
Mtap2	0.586575	6.33012	5.41877	0.000364533	0.0327725	0.553659
Col1a1	-0.953447	6.69805	-5.41678	0.00036551	0.0327725	0.551119
Wasf2	-0.893731	5.21377	-5.41224	0.000367755	0.0327725	0.545311
Adamts2	-0.70206	8.7962	-5.41015	0.000368793	0.0327725	0.542636
1810035L17Rik	0.661286	8.90948	5.40885	0.000369444	0.0327725	0.540964
Brd4	-0.697794	8.96187	-5.4062	0.00037077	0.0327725	0.537564
Spnb2	-0.629403	9.24415	-5.39804	0.000374878	0.0329655	0.527108
1110002N22Rik	0.649974	6.42526	5.38966	0.00037915	0.0329655	0.516355
1700023M03Rik	0.580856	7.7385	5.38404	0.000382044	0.0329655	0.509137
Grn	-0.702215	10.5499	-5.3802	0.000384037	0.0329655	0.504197
Zbtb7	-0.680359	7.69416	-5.37917	0.000384573	0.0329655	0.502872
Uxt	0.593624	8.99723	5.37219	0.000388228	0.0329655	0.493892
D10627	0.620904	6.29531	5.3713	0.000388693	0.0329655	0.492754
Hist1h4i	0.609088	6.10244	5.36855	0.000390147	0.0329655	0.489209
Sort1	-0.711135	11.0943	-5.36344	0.000392861	0.0329655	0.482624
Hcst	0.607232	7.3126	5.36033	0.000394525	0.0329655	0.478612
Rpa3	0.80855	8.21687	5.36015	0.000394619	0.0329655	0.478384
Hspc171	0.608499	10.3954	5.35984	0.000394786	0.0329655	0.477983
Fcf1	0.655386	7.97718	5.3527	0.000398632	0.0329822	0.468774
Ubl4	0.616775	7.77561	5.34964	0.000400289	0.0329822	0.464832
Actn4	-0.660896	8.1943	-5.34935	0.000400446	0.0329822	0.46446
Slc7a3	0.665162	4.64968	5.34036	0.000405369	0.0332366	0.452848
Hmgn3	0.60039	9.20741	5.33662	0.00040744	0.0332559	0.448005
Aif1	0.662627	8.08987	5.33038	0.000410913	0.0333013	0.43994
Nxt1	0.64895	7.25284	5.32785	0.000412334	0.0333013	0.436658
Mark2	-0.775059	9.61891	-5.32227	0.000415474	0.0333013	0.429445
Ctla4	0.778923	6.03875	5.31844	0.000417654	0.0333013	0.424471
D17Wsu104e	0.594008	7.89397	5.31516	0.000419524	0.0333013	0.420224
Sbk	-0.848369	7.3124	-5.31489	0.000419676	0.0333013	0.419879
A130092J06Rik	-0.873805	7.36277	-5.31283	0.00042086	0.0333013	0.417199
B230114P05Rik	-0.739108	7.30891	-5.30613	0.000424723	0.0334608	0.40851
Tnxb	-0.570474	7.41715	-5.29465	0.000431434	0.0338229	0.393598
Cx3cl1	-0.859085	7.08139	-5.28968	0.000434372	0.0338229	0.387142
Scarf2	-0.675547	10.5823	-5.28876	0.00043492	0.0338229	0.385943
Lsm5	0.630516	9.06031	5.27656	0.000442242	0.0341494	0.370056
4933404M02Rik	0.823571	6.23013	5.27208	0.000444962	0.0341494	0.364219
Eppb9	0.593927	8.1438	5.27136	0.0004454	0.0341494	0.363284
Jmjd3	-0.79471	7.34635	-5.2693	0.000446655	0.0341494	0.360605
Mast2	-0.79242	7.41918	-5.26554	0.000448965	0.0341817	0.355695
2410015M20Rik	0.614315	8.06419	5.25681	0.000454374	0.0343462	0.344294
Hspg2	-0.91585	8.42104	-5.2516	0.00045763	0.0343462	0.337495
2410015N17Rik	0.564601	7.5393	5.25061	0.000458257	0.0343462	0.336192
0910001L09Rik	0.574745	10.8146	5.24724	0.000460381	0.0343462	0.331788
1810049H13Rik	0.590297	7.09262	5.23638	0.000467301	0.0343462	0.317579
Dusp19	0.69304	7.38534	5.23033	0.000471204	0.0343462	0.309654
EG624219	0.613113	5.5146	5.22989	0.000471488	0.0343462	0.309081
Mgst2	0.730844	8.08159	5.22694	0.000473408	0.0343462	0.30521
Mrpl1	0.769879	7.76098	5.22634	0.000473796	0.0343462	0.30443
Atp2a3	-0.755024	10.4105	-5.22425	0.000475163	0.0343462	0.301684
Commd6	0.606538	8.83487	5.22265	0.000476208	0.0343462	0.29959
1810063B05Rik	0.693412	8.27939	5.22166	0.000476857	0.0343462	0.298293
2700097O09Rik	0.629741	7.16929	5.22126	0.000477123	0.0343462	0.297761
Hr	-0.70816	5.85311	-5.22009	0.000477892	0.0343462	0.296226
6530403A03Rik	0.628671	3.8541	5.21096	0.000483941	0.0343462	0.28424
Cxcl4	0.687726	8.47684	5.20729	0.000486392	0.0343462	0.279426
1190017O12Rik	0.604211	9.45034	5.20599	0.000487268	0.0343462	0.27771
Zfhx2	-0.601378	6.38496	-5.20318	0.000489161	0.0343462	0.274015
BC005682	0.687991	7.19718	5.20277	0.000489438	0.0343462	0.273474
Rnf44	-0.63139	9.71954	-5.20164	0.000490199	0.0343462	0.271992
Ccl7	0.932479	7.19066	5.19506	0.00049467	0.0343462	0.263336
2310022B05Rik	-0.693586	8.82502	-5.19404	0.000495367	0.0343462	0.261995
Irf2	-0.625697	9.81824	-5.19299	0.000496088	0.0343462	0.260608
0710001B24Rik	0.750876	5.9128	5.19222	0.000496617	0.0343462	0.259591
1110001A23Rik	0.720756	6.77781	5.18255	0.000503296	0.0343763	0.246853
Psen1	-0.672116	6.79908	-5.17927	0.000505578	0.0343763	0.242537
Foxp1	-0.624979	6.84228	-5.17668	0.000507394	0.0343763	0.239118
Bbs5	0.748134	6.85608	5.17515	0.000508469	0.0343763	0.237101
0610012D17Rik	0.682898	8.9106	5.17155	0.000511013	0.0343763	0.23234
Loxl1	-0.612329	9.70172	-5.17129	0.000511195	0.0343763	0.232
1700007G11Rik	0.649444	7.66559	5.16903	0.000512795	0.0343763	0.229019
Ceacam1	-0.594681	6.60648	-5.16902	0.0005128	0.0343763	0.229009
Mlf1	0.724954	8.14546	5.16708	0.000514179	0.0343763	0.226446
Fbxo42	-0.601627	6.53182	-5.15508	0.000522801	0.0343763	0.210581
Mkks	0.610895	7.33851	5.15485	0.000522967	0.0343763	0.210279
1700127F16Rik	0.740552	5.92952	5.15442	0.000523281	0.0343763	0.209705
Adh1	-0.589687	9.45839	-5.15394	0.000523629	0.0343763	0.209071
1700001C14Rik	0.842773	6.82109	5.15367	0.000523825	0.0343763	0.208713
Ndst1	-0.617617	8.47003	-5.15135	0.000525509	0.0343763	0.20565
Cox7c	0.620951	10.9384	5.1479	0.000528033	0.0344171	0.201078
Ank3	-0.699983	5.84646	-5.1448	0.00053031	0.0344272	0.196971
Ednrb	-0.671674	9.37071	-5.14041	0.000533552	0.0344272	0.191154
Cfd	-1.31395	9.63407	-5.13806	0.000535295	0.0344272	0.188041
Agrn	-0.700228	10.7226	-5.1374	0.000535787	0.0344272	0.187163
Hist1h2bm	0.777669	8.1592	5.13203	0.000539796	0.034455	0.180047
Dph4	0.545995	7.44283	5.11762	0.000550725	0.034455	0.160907
1110015K06Rik	-0.622067	7.76046	-5.11436	0.000553229	0.034455	0.156574
1700018O18Rik	0.90025	8.02793	5.11429	0.000553282	0.034455	0.156484
Sdccag1	-0.578915	5.65628	-5.11267	0.000554531	0.034455	0.154329
Hbb-b2	1.01885	5.14904	5.11116	0.000555697	0.034455	0.152323
1110017O22Rik	0.669232	5.68476	5.11006	0.000556552	0.034455	0.150855
Aplp2	-0.632381	11.5275	-5.10891	0.000557444	0.034455	0.149326
Mterf	0.730985	6.87208	5.10796	0.000558184	0.034455	0.148059
Chek2	0.700875	5.80816	5.10685	0.000559041	0.034455	0.146594
Ndufa2	0.547241	10.463	5.10479	0.000560648	0.034455	0.14385
Shfdg1	0.569152	10.8792	5.10474	0.000560693	0.034455	0.143774
Deb1	0.627827	9.63601	5.10411	0.000561183	0.034455	0.142939
Arf3	-0.653764	7.8778	-5.10199	0.000562841	0.034455	0.140122
1110001J03Rik	0.59676	8.74389	5.09859	0.000565515	0.0345021	0.135594
Midn	-0.616743	9.43568	-5.09226	0.000570534	0.0346737	0.127152
Cstf3	0.62581	7.50916	5.09021	0.000572167	0.0346737	0.12442
Pon1	0.660817	9.2812	5.08781	0.000574088	0.0346737	0.121218
Trappc2	0.849167	6.56543	5.08353	0.000577531	0.0346737	0.115503
Slc12a7	-0.635321	5.72595	-5.08308	0.000577894	0.0346737	0.114903
Col1a2	-0.800369	6.45475	-5.07425	0.000585068	0.0348375	0.103111
Snf1lk	-0.571637	5.93646	-5.07069	0.00058798	0.0348375	0.0983653
Mmp13	0.607557	6.31687	5.07029	0.000588315	0.0348375	0.0978203
Ocil	1.00532	10.1035	5.06704	0.000590992	0.0348806	0.0934801
Zfp52	0.706471	4.53682	5.06163	0.000595482	0.0348806	0.0862445
Sdhd	0.563806	6.73508	5.06075	0.000596221	0.0348806	0.0850592
0610010E21Rik	0.633844	7.91644	5.05877	0.000597876	0.0348806	0.0824084
Ptpla	0.60451	7.54655	5.05553	0.000600595	0.0348806	0.0780701
Bola2	0.553076	8.90049	5.05514	0.00060092	0.0348806	0.0775519
C130086A10	0.905687	6.77985	5.05077	0.000604607	0.0348806	0.0717024
Sema4b	-0.637122	8.26319	-5.04958	0.000605616	0.0348806	0.0701079
C87436	-0.556145	6.66354	-5.0487	0.000606368	0.0348806	0.0689225
Prpf8	-0.777769	7.72146	-5.04451	0.000609937	0.0349749	0.0633086
Avpi1	0.552259	8.70062	5.0364	0.00061692	0.0351682	0.0524207
Fcamr	0.707226	4.78285	5.03502	0.000618114	0.0351682	0.0505704
Sparc	-0.555493	10.7784	-5.03207	0.000620678	0.0351682	0.0466109
Ltbp4	-0.832686	9.40533	-5.02778	0.00062443	0.0351682	0.0408441
BC054059	0.596579	5.81696	5.02742	0.000624746	0.0351682	0.0403601
Trim8	-0.599083	9.95857	-5.02718	0.000624954	0.0351682	0.0400427
Scnn1a	-0.747431	8.75166	-5.02391	0.000627832	0.0352208	0.0356469
1110012J17Rik	-0.665178	7.42437	-5.0206	0.000630763	0.035276	0.0311891
Helz	-0.691188	5.99782	-5.01667	0.000634252	0.035362	0.0259103
Tcte3	0.544824	5.50751	5.00622	0.00064365	0.0356756	0.0118332
Dnajc19	0.586982	10.0403	5.00604	0.000643815	0.0356756	0.0115878
Ubd	0.832449	5.39999	4.99299	0.000655757	0.0360491	-0.00600616
2810004N20Rik	0.571037	8.01102	4.99216	0.000656524	0.0360491	-0.00712437
Hoxb13	-0.586827	3.87502	-4.98294	0.000665118	0.0364107	-0.0195779
Dag1	-0.711239	8.19747	-4.97835	0.000669441	0.036537	-0.0257819
Siat8b	-0.727478	4.96076	-4.96981	0.000677562	0.0367447	-0.0373297
Pfn2	0.561133	7.35642	4.96937	0.000677983	0.0367447	-0.0379257
Rfx2	-0.576643	7.11552	-4.96797	0.000679331	0.0367447	-0.0398284
LOC230075	0.565282	10.3349	4.96253	0.000684571	0.036918	-0.0471891
Psmb5	0.561437	8.10424	4.95538	0.000691529	0.0371028	-0.0568773
1810008A14Rik	0.645898	6.6651	4.9521	0.000694751	0.0371028	-0.0613303
Cd47	-0.600459	9.14037	-4.95125	0.000695587	0.0371028	-0.0624835
Sybl1	0.721635	8.12893	4.95064	0.000696189	0.0371028	-0.0633121
Centg2	-0.562878	8.68256	-4.94065	0.000706109	0.0373794	-0.0768695
Il10	0.861654	4.48872	4.94036	0.000706393	0.0373794	-0.0772555
BC035291	-0.941692	7.58294	-4.93666	0.000710115	0.0373794	-0.0822923
E430002D04Rik	1.06293	5.53869	4.93299	0.000713812	0.0373794	-0.0872694
Ace	-0.717537	4.71267	-4.93259	0.000714225	0.0373794	-0.0878235
Cd8b	-0.704548	8.31466	-4.93101	0.00071582	0.0373794	-0.0899615
Nip7	0.719794	7.60461	4.92335	0.000723644	0.0376614	-0.100383
1190007F08Rik	0.594959	8.85712	4.92167	0.000725377	0.0376614	-0.102676
Fxc1	0.560519	7.90215	4.91725	0.000729947	0.0377904	-0.108697
1500026D16Rik	0.630947	6.32489	4.91365	0.000733684	0.0378077	-0.113594
BC019977	-0.691419	10.0196	-4.91209	0.000735319	0.0378077	-0.115728
Smarcc1	-0.577585	4.72377	-4.90791	0.000739697	0.0378077	-0.121421
Plac8	0.574136	9.58726	4.90717	0.000740475	0.0378077	-0.122429
Creb3l2	-0.543188	5.8845	-4.90608	0.000741628	0.0378077	-0.12392
Srp14	0.551481	9.94142	4.90497	0.000742801	0.0378077	-0.125436
425O18-1	0.64769	5.18007	4.89672	0.000751571	0.0380854	-0.136693
H2-Q8	0.645083	8.26497	4.89523	0.000753162	0.0380854	-0.138722
Ndufa6	0.605406	10.7015	4.89393	0.000754562	0.0380854	-0.140503
Bcl11a	-0.625868	4.74371	-4.8906	0.000758144	0.0381599	-0.145046
AI429612	-0.575498	7.71069	-4.88613	0.000762986	0.0382239	-0.151153
Tnrc6c	-0.615356	6.98801	-4.88332	0.000766049	0.0382239	-0.154998
Nfkb1	-0.578948	8.54125	-4.88298	0.000766424	0.0382239	-0.155466
Phactr4	-0.668084	8.74251	-4.88167	0.000767854	0.0382239	-0.157255
Tbca	0.557915	11.6754	4.87708	0.000772901	0.0382533	-0.163541
Smoc1	-0.6009	5.44098	-4.87538	0.000774776	0.0382533	-0.165866
6720485C15Rik	-0.588955	8.52997	-4.86803	0.000782938	0.0383428	-0.175922
4631426J05Rik	-0.632787	6.67307	-4.86328	0.000788268	0.0384998	-0.182433
Myo10	-0.662918	5.56088	-4.85787	0.000794393	0.0386946	-0.189862
Myh10	-0.6149	7.37148	-4.84625	0.000807693	0.039044	-0.2058
Nudt2	0.632515	6.58174	4.84556	0.000808501	0.039044	-0.206761
2310006J04Rik	0.59148	6.14306	4.8441	0.000810184	0.039044	-0.208757
Capn6	-0.665295	4.94853	-4.83284	0.000823356	0.0394688	-0.224242
2010007H12Rik	0.549816	8.24197	4.82412	0.000833716	0.0396919	-0.23625
Zfp574	-0.723556	7.39299	-4.81921	0.000839603	0.0396919	-0.243008
Tgfb1	-0.587654	6.76407	-4.81885	0.000840038	0.0396919	-0.243506
1300003K24Rik	-0.581663	6.20304	-4.81799	0.000841079	0.0396919	-0.244695
Atp6v0a1	-0.694384	8.61647	-4.81786	0.000841237	0.0396919	-0.244876
Tsrc1	-0.65184	7.15916	-4.81755	0.000841609	0.0396919	-0.2453
Nup210	-0.935796	8.88256	-4.80614	0.000855506	0.0400189	-0.261033
Satb1	-0.75645	7.59245	-4.80551	0.00085628	0.0400189	-0.261902
Ndufb9	0.583505	6.85409	4.79988	0.000863235	0.0400532	-0.269674
Kcnb1	-0.628875	5.18332	-4.79759	0.000866083	0.0400532	-0.272839
Hint3	0.732759	7.87169	4.79726	0.000866493	0.0400532	-0.273293
2210021J22Rik	0.621912	7.15372	4.7902	0.000875338	0.0403591	-0.283053
Lrp4	-0.622727	8.72417	-4.78231	0.000885338	0.0407166	-0.29397
Lyrm5	0.740196	8.5616	4.77786	0.000891029	0.0408398	-0.300128
1500031H04Rik	0.734109	6.65606	4.76948	0.000901854	0.0410593	-0.311736
Egln1	-0.629263	4.82781	-4.76575	0.000906723	0.0411775	-0.316911
LOC654426	0.579126	9.45646	4.75732	0.000917815	0.0413495	-0.328601
Timm8a1	0.645226	8.051	4.75559	0.000920109	0.0413495	-0.331002
2310016E02Rik	0.56471	10.6858	4.75423	0.000921921	0.0413495	-0.332894
Dscr5	0.582337	9.47077	4.7501	0.000927442	0.0414944	-0.338635
Nat5	0.621156	8.49808	4.73681	0.000945425	0.0420927	-0.357105
Clu	-0.576958	10.5135	-4.7295	0.000955484	0.0423428	-0.367284
Pnpla2	-0.599691	9.58059	-4.72931	0.000955752	0.0423428	-0.367554
1810031K02Rik	-0.585933	9.75956	-4.72641	0.000959771	0.0423978	-0.371591
Gzmm	0.590469	6.15626	4.72479	0.000962033	0.0423978	-0.373855
Dock1	-0.545289	5.81388	-4.72149	0.000966638	0.0423978	-0.378449
Mscp	0.602172	7.00451	4.72048	0.000968045	0.0423978	-0.379849
BC037006	-0.691387	7.52559	-4.72002	0.000968691	0.0423978	-0.380491
Psmb9	0.562955	9.54199	4.71464	0.000976282	0.0426271	-0.388001
Rreb1	-0.597913	6.74485	-4.71268	0.000979061	0.0426456	-0.390736
Sorbs1	-0.712063	5.19357	-4.70438	0.000990925	0.0428754	-0.402326
Hist1h4h	0.605251	6.86608	4.70386	0.000991664	0.0428754	-0.403043
Bbox1	0.837377	5.7353	4.69781	0.00100042	0.0430586	-0.411507
2410042D21Rik	0.548181	7.48271	4.69395	0.00100604	0.0430946	-0.416893
Rin3	-0.669185	7.74044	-4.69234	0.0010084	0.0430946	-0.419146
Snca	1.67957	8.29064	4.68827	0.00101438	0.043147	-0.424844
Rgl1	-0.568226	7.93039	-4.6855	0.00101848	0.0431766	-0.428724
Mfap4	-0.760225	9.89684	-4.68457	0.00101985	0.0431766	-0.430014
Sipa1l1	-0.548943	8.31552	-4.68262	0.00102275	0.0431988	-0.432756
Gstm5	0.619074	7.23346	4.67866	0.00102865	0.0432488	-0.438291
Ndufs4	0.65	9.73309	4.67862	0.00102871	0.0432488	-0.438347
Lamb3	-0.554459	8.72513	-4.67689	0.00103131	0.0432576	-0.440774
Bcl2a1c	0.746405	7.58111	4.67288	0.00103735	0.0433104	-0.446395
Ada	0.617203	4.717	4.6688	0.00104352	0.0434681	-0.45211
Cklf	0.679814	7.64273	4.66493	0.00104943	0.0435842	-0.457546
Wwc1	-0.634821	6.48799	-4.66383	0.00105112	0.0435842	-0.459095
Chrac1	0.587552	8.28839	4.66181	0.00105421	0.0436124	-0.46192
Bad	0.551096	7.77639	4.66008	0.00105688	0.0436233	-0.464357
App	-0.560545	10.6669	-4.65393	0.00106639	0.0438302	-0.472987
Chchd7	0.575239	7.46271	4.65371	0.00106673	0.0438302	-0.47329
C430014D17Rik	-0.551859	5.00854	-4.63775	0.00109188	0.0445849	-0.495742
S100a9	0.977489	10.1613	4.63738	0.00109248	0.0445849	-0.496264
Prdx4	0.581497	10.4245	4.63426	0.00109746	0.0446878	-0.500653
Lasp1	-0.638696	10.5533	-4.63206	0.001101	0.0447312	-0.503751
Gsk3b	-0.563861	6.16645	-4.62711	0.00110899	0.044923	-0.510719
Rab11b	-0.569038	11.0579	-4.62508	0.0011123	0.044923	-0.513586
Furin	-0.608141	9.77822	-4.62338	0.00111506	0.044923	-0.51598
Acac	-0.620485	8.69302	-4.62303	0.00111564	0.044923	-0.516475
Zfp119	0.611954	6.07708	4.61922	0.00112187	0.0449742	-0.521846
5730509C05Rik	-0.730377	7.13341	-4.61757	0.00112458	0.0449831	-0.524166
Podxl	-0.563288	8.64675	-4.61249	0.00113299	0.045027	-0.531347
Tnfrsf17	1.03443	5.1988	4.6109	0.00113561	0.045027	-0.533578
1110028E10Rik	-0.590597	10.0035	-4.60709	0.00114198	0.0450822	-0.538967
Zcwpw1	0.610844	5.1198	4.60407	0.00114705	0.0451838	-0.543233
4833424P18Rik	0.622943	7.28624	4.59854	0.00115639	0.0452673	-0.551047
S100a10	0.632077	8.89297	4.59837	0.00115666	0.0452673	-0.551279
Retnlg	0.986463	8.22376	4.59461	0.00116307	0.0453222	-0.556603
LOC434858	-0.728427	8.22133	-4.59266	0.0011664	0.0453544	-0.559357
A930034L06Rik	0.610208	6.89596	4.59011	0.00117078	0.0454274	-0.562974
Gale	0.643442	5.49672	4.58466	0.00118018	0.0456943	-0.570684
Mbtps1	-0.577491	6.91366	-4.57868	0.00119059	0.0458646	-0.57915
Gdpd3	0.634284	6.22683	4.57849	0.00119093	0.0458646	-0.579425
Hist1h2bn	0.675552	8.22043	4.57694	0.00119364	0.0458646	-0.581614
Guca1a	0.550249	6.2096	4.57525	0.00119661	0.0458646	-0.584008
Mcee	0.546861	9.72372	4.57489	0.00119724	0.0458646	-0.584516
2310015N07Rik	0.743427	7.7279	4.56886	0.00120792	0.0459522	-0.593079
Drpla	-0.598495	5.3098	-4.56571	0.00121352	0.0459522	-0.597541
Dctn3	0.55069	9.44573	4.56519	0.00121445	0.0459522	-0.598284
Sc4mol	0.599925	8.56113	4.5645	0.00121569	0.0459522	-0.599262
Sod3	-0.707377	6.82129	-4.56201	0.00122014	0.0459522	-0.602788
0610009I22Rik	0.55664	7.21139	4.56195	0.00122025	0.0459522	-0.602873
Trim56	-0.608019	6.48114	-4.56063	0.00122263	0.0459522	-0.604754
9530077C05Rik	0.677894	5.6919	4.55938	0.00122488	0.0459522	-0.60653
9130404D14Rik	-0.560721	10.2912	-4.5554	0.00123208	0.0460316	-0.612181
Itih4	-0.666034	10.507	-4.5531	0.00123626	0.0460675	-0.615447
Rapgef5	-0.56257	7.1125	-4.54806	0.00124548	0.0462461	-0.622614
Wbp2	-0.583264	11.7449	-4.54	0.00126037	0.046513	-0.634076
Mycbp	0.553676	8.31666	4.52442	0.00128969	0.046946	-0.656261
Vbp1	0.578036	6.8011	4.52413	0.00129024	0.046946	-0.656674
Rnpepl1	-0.623138	10.9327	-4.51998	0.00129818	0.047046	-0.662594
EG433016	1.01736	6.09801	4.51793	0.00130211	0.0470943	-0.665511
Lrrc34	0.571893	7.28641	4.51627	0.00130531	0.047116	-0.66788
Sema6d	-0.629986	6.07837	-4.50988	0.00131771	0.0472033	-0.677007
Aatk	-0.557726	8.03804	-4.50931	0.00131883	0.0472033	-0.677824
Apg7l	-0.59676	5.46576	-4.50666	0.00132401	0.0472033	-0.681606
AF322649	-0.591494	6.90368	-4.50566	0.00132597	0.0472033	-0.683032
Tmem60	0.627621	8.45592	4.50361	0.00132999	0.0472539	-0.685958
Gab1	-0.642192	8.8176	-4.50046	0.00133621	0.0472816	-0.690459
Itih1	-0.681275	7.15658	-4.49619	0.00134469	0.0473298	-0.696566
Ccl17	0.627323	8.02465	4.49059	0.0013559	0.0476123	-0.704576
Kcnk3	-0.881819	5.28633	-4.48931	0.00135848	0.0476123	-0.706411
Smc1a	-0.558084	8.89785	-4.48539	0.00136638	0.047797	-0.712013
Eef1e1	0.665277	6.96923	4.48233	0.0013726	0.0478615	-0.716395
Ear10	0.640976	7.54045	4.47943	0.00137852	0.0479441	-0.720554
2410022L05Rik	0.664207	6.8393	4.47055	0.00139681	0.0480439	-0.733277
Ccr7	-0.557808	5.3085	-4.46961	0.00139877	0.0480439	-0.734628
3632413B07Rik	-0.616346	6.07583	-4.46272	0.00141316	0.0482324	-0.744514
Mcc	-0.622534	8.16905	-4.4615	0.00141572	0.0482324	-0.746261
Abcd1	-0.555485	6.06116	-4.45327	0.00143315	0.0485613	-0.758078
Dyrk1b	-0.617027	7.51118	-4.44633	0.00144804	0.0487443	-0.768058
2610528M18Rik	0.635295	5.83916	4.44197	0.00145745	0.0487443	-0.774318
Rusc2	-0.554831	8.85462	-4.44171	0.00145802	0.0487443	-0.774697
Gdnf	-0.589023	6.54749	-4.43874	0.00146448	0.0488698	-0.778962
Clecsf8	0.661801	8.45542	4.43241	0.00147836	0.0490125	-0.788078
Rpp30	0.572386	7.57105	4.43098	0.00148152	0.0490125	-0.790137
Arhgef18	-0.563345	8.68213	-4.4291	0.00148568	0.0490357	-0.792851
Extl3	-0.55319	9.49424	-4.42787	0.00148841	0.0490363	-0.79462
Pltp	-0.560086	9.71602	-4.42626	0.00149197	0.0490645	-0.796932
Rbms1	-0.548203	8.93325	-4.41034	0.00152786	0.0498262	-0.819897
Gm525	0.735371	5.05526	4.40989	0.00152888	0.0498262	-0.820543
3110007F17Rik	0.625902	5.35558	4.40606	0.00153766	0.0498383	-0.826075
Ttyh3	-0.638168	6.31874	-4.40462	0.00154098	0.0498383	-0.828156
Znhit3	0.64761	7.08446	4.40374	0.00154301	0.0498383	-0.829429
Ppp1r13b	-0.658012	7.30715	-4.39499	0.00156332	0.0502302	-0.842067
Ahnak	-0.57954	10.7137	-4.39467	0.00156407	0.0502302	-0.842532
Hnrpa2b1	-0.565663	8.34636	-4.38932	0.00157664	0.0502715	-0.85027
LOC434179	-0.654491	3.37034	-4.38848	0.00157861	0.0502715	-0.851476
Ncstn	-0.616253	9.09743	-4.38351	0.00159041	0.0505582	-0.85867
Snrpd3	0.555972	8.99743	4.382	0.00159401	0.0505839	-0.860854
Mint	-0.729826	4.65734	-4.37439	0.0016123	0.0508969	-0.871882
Arl6	0.613255	7.54061	4.36835	0.00162695	0.0509322	-0.88063
Uqcrb	0.568658	9.47191	4.36471	0.00163587	0.0509322	-0.885916
Tob2	-0.567992	6.05433	-4.36228	0.00164182	0.0509322	-0.889427
Cysltr1	0.554524	5.79418	4.36136	0.00164411	0.0509322	-0.890774
Cdh13	-0.696256	5.66385	-4.3612	0.00164451	0.0509322	-0.891005
Lama2	-0.678663	6.11651	-4.36106	0.00164483	0.0509322	-0.891196
AA467197	0.652856	9.34325	4.35989	0.00164774	0.0509322	-0.892902
2010316F05Rik	0.703216	8.01874	4.35926	0.00164929	0.0509322	-0.893813
Igfbp5	-0.68669	9.95511	-4.35653	0.00165607	0.0509322	-0.89778
Ndufv2	0.551404	10.1794	4.35348	0.00166366	0.0509322	-0.902201
Scube2	-0.577614	5.39783	-4.35334	0.00166401	0.0509322	-0.902404
Zfp97	0.589768	6.41227	4.35277	0.00166544	0.0509322	-0.903234
1810046I24Rik	0.76685	6.66246	4.35169	0.00166815	0.0509322	-0.904808
4933428G20Rik	-0.761554	7.40467	-4.34748	0.00167873	0.0511237	-0.910919
Nrn1	0.893297	7.88549	4.33402	0.00171304	0.0518202	-0.930484
Tipin	0.621383	7.74095	4.33239	0.00171725	0.051861	-0.932858
2310061A22Rik	0.651272	6.12678	4.32888	0.00172635	0.0520174	-0.937967
Hist1h2bc	0.592843	9.90076	4.32818	0.00172817	0.0520174	-0.938989
5430400N05Rik	-0.543874	7.46274	-4.32328	0.00174097	0.0520669	-0.946122
A430083B19Rik	0.804472	6.14718	4.32067	0.00174783	0.0520669	-0.949927
2210418O10Rik	0.595394	9.57791	4.31859	0.00175331	0.0520669	-0.952957
Pafah1b3	0.581017	7.89194	4.31793	0.00175506	0.0520669	-0.953919
Vwf	-0.581015	10.702	-4.31792	0.00175509	0.0520669	-0.953935
1200007D18Rik	-0.603648	7.30951	-4.31732	0.00175666	0.0520669	-0.954802
Rab6b	-0.576963	7.62036	-4.31722	0.00175695	0.0520669	-0.954959
Casp1	0.667908	9.4518	4.30839	0.00178048	0.0524906	-0.96783
Mbc2	-0.556821	9.05179	-4.30691	0.00178445	0.0524906	-0.969984
Immp2l	0.599165	6.0787	4.30006	0.001803	0.0529502	-0.979986
Rgma	-0.631069	5.68558	-4.2879	0.00183642	0.0535775	-0.997754
Cacybp	0.625889	5.44945	4.28687	0.00183928	0.0535775	-0.999261
Palld	-0.552436	6.60572	-4.28281	0.0018506	0.0536905	-1.0052
Slc9a1	-0.619494	7.40478	-4.28023	0.00185783	0.0537534	-1.00897
Rg9mtd1	0.63661	6.36713	4.27945	0.00186001	0.0537534	-1.01011
Bex2	0.558108	8.25742	4.27328	0.00187748	0.0541717	-1.01915
Acvr2b	-0.545838	7.44116	-4.27212	0.00188076	0.0541803	-1.02084
Med25	-0.592387	8.19423	-4.26538	0.00190006	0.0546493	-1.03072
1190003J15Rik	0.547107	8.2523	4.2614	0.00191154	0.0548923	-1.03655
Gbf1	-0.624205	7.6388	-4.25545	0.00192885	0.0551275	-1.04528
Ndufc2	0.571456	10.5327	4.24422	0.00196196	0.0558974	-1.06175
Nat2	0.564055	6.51585	4.23932	0.00197662	0.0560073	-1.06895
2310015N21Rik	-0.557319	6.48802	-4.2388	0.00197816	0.0560073	-1.06971
Churc1	0.610049	8.54158	4.23591	0.00198688	0.0560073	-1.07396
Nrp	-0.617076	10.0509	-4.2349	0.00198992	0.0560073	-1.07544
Nudt5	0.623788	7.64757	4.23345	0.00199432	0.0560073	-1.07758
Cyp7a1	-0.586331	3.91662	-4.23336	0.00199459	0.0560073	-1.07771
Col4a4	-0.570931	6.14317	-4.23265	0.00199673	0.0560073	-1.07875
Bgn	-0.662382	11.936	-4.22768	0.00201187	0.0561429	-1.08606
Pxmp3	0.561282	8.52659	4.22393	0.00202337	0.056205	-1.09158
Rplp2	-0.629841	3.80003	-4.22123	0.00203169	0.056205	-1.09555
Ccnc	0.549821	7.05579	4.21992	0.00203574	0.0562217	-1.09748
Olfr1288	0.56848	3.82401	4.21697	0.00204488	0.0562217	-1.10182
Ctdsp2	-0.578526	9.83621	-4.21674	0.0020456	0.0562217	-1.10216
Klk9	-0.551468	3.93768	-4.21568	0.0020489	0.0562217	-1.10372
Mrpl20	0.558699	8.40275	4.21389	0.00205449	0.0562217	-1.10636
Cd209b	0.660575	4.49424	4.21382	0.0020547	0.0562217	-1.10646
Ncoa4	-0.563343	6.31535	-4.21107	0.00206332	0.0562217	-1.11051
Sox7	-0.719907	8.41689	-4.20943	0.0020685	0.056278	-1.11293
Ches1	-0.574937	7.51286	-4.20731	0.00207518	0.0563751	-1.11606
Mrpl30	0.577522	8.60174	4.20568	0.00208032	0.0564303	-1.11845
Timm8b	0.544804	9.7935	4.20248	0.00209049	0.0566213	-1.12317
Pts	0.580198	9.38584	4.20066	0.0020963	0.056694	-1.12586
Mrps36	0.542803	4.07169	4.1911	0.00212705	0.0572193	-1.13996
2410025L10Rik	-0.664846	7.76929	-4.19041	0.0021293	0.0572193	-1.14099
Gngt2	0.557841	8.65955	4.18932	0.00213283	0.0572193	-1.14259
1110001A07Rik	0.560501	6.00699	4.16915	0.00219952	0.0582679	-1.17241
Pak4	-0.592716	8.32947	-4.16305	0.00222013	0.0584763	-1.18144
Ttc17	-0.561043	7.76501	-4.16205	0.00222352	0.0584763	-1.18292
Lat	0.555044	6.22789	4.14275	0.00229014	0.0592652	-1.21151
Msr2	-0.660581	6.91751	-4.13773	0.00230782	0.0592652	-1.21896
Sprr2a	0.680809	6.50313	4.13761	0.00230824	0.0592652	-1.21914
2810405K02Rik	0.582152	6.20279	4.12964	0.0023366	0.05954	-1.23097
Cyp3a41	0.761801	3.34986	4.12882	0.00233954	0.05954	-1.23219
Prg	0.611301	8.08048	4.12351	0.00235869	0.0596086	-1.24008
2810453L12Rik	-0.662065	4.39973	-4.12047	0.0023697	0.0597404	-1.2446
A030007L17Rik	0.554711	6.28293	4.11915	0.00237451	0.0597404	-1.24656
Neo1	-0.593384	6.87088	-4.10739	0.00241779	0.0603449	-1.26406
Ube4b	-0.577625	7.88088	-4.10614	0.00242242	0.0603773	-1.26592
Bcas3	-0.567018	8.57788	-4.08855	0.00248885	0.0610033	-1.29213
Lnp	-0.69013	3.80051	-4.0879	0.0024913	0.0610033	-1.29308
Bicc1	-0.596549	7.12419	-4.08592	0.00249893	0.0611075	-1.29605
Rela	-0.626928	9.36522	-4.0807	0.00251909	0.0614234	-1.30383
Tnfsf6	0.571246	4.9732	4.07701	0.00253345	0.0614234	-1.30934
Pml	-0.723754	7.5714	-4.07646	0.00253558	0.0614234	-1.31015
1110007M04Rik	0.598755	7.5126	4.07393	0.00254548	0.0614988	-1.31393
Mia1	0.549948	6.27392	4.07184	0.00255372	0.0616157	-1.31706
Rgs1	0.963131	8.10751	4.07062	0.0025585	0.0616488	-1.31887
Xcl1	0.618581	5.19705	4.06801	0.00256882	0.0617335	-1.32278
Hspe1	0.588513	7.46928	4.06341	0.00258713	0.061927	-1.32966
Ube1x	-0.567428	8.85201	-4.03598	0.00269905	0.0637071	-1.37071
Lrp10	-0.589424	11.0335	-4.03583	0.00269966	0.0637071	-1.37093
Agtr1a	-0.562477	6.16251	-4.0298	0.00272495	0.0640417	-1.37997
Map3k11	-0.576637	8.12142	-4.0226	0.00275545	0.0644303	-1.39076
Lmtk2	-0.600249	8.40065	-4.02228	0.00275683	0.0644303	-1.39124
Lbx2h	0.5567	4.7045	4.01138	0.00280375	0.0644827	-1.4076
D10Bwg0791e	0.550019	3.72311	4.00835	0.00281694	0.0644827	-1.41215
Sema4f	-0.580158	6.23193	-3.99377	0.00288136	0.065192	-1.43407
Brp17	-0.56757	7.0143	-3.99367	0.00288183	0.065192	-1.43423
BC024955	-0.553095	6.53664	-3.98968	0.0028997	0.0654328	-1.44022
Srp19	0.727732	5.81	3.98742	0.00290988	0.0655007	-1.44362
BC042901	-0.665126	5.70643	-3.98661	0.00291355	0.0655007	-1.44484
Casp4	0.658001	8.02614	3.98159	0.00293637	0.0655341	-1.45241
Ecm1	-0.568683	9.24598	-3.97575	0.00296314	0.0657186	-1.4612
Cd248	-0.575791	6.28789	-3.9715	0.00298275	0.0658312	-1.4676
Coro2b	-0.596129	5.50511	-3.96065	0.00303354	0.0665468	-1.48397
1110059E24Rik	0.565918	8.45822	3.95814	0.00304542	0.0665657	-1.48776
Btc	0.590722	5.33931	3.9497	0.00308569	0.0669614	-1.5005
6330409N04Rik	0.564889	5.91066	3.93568	0.00315382	0.0679212	-1.52168
Nt5c3	0.607938	7.86295	3.93513	0.00315652	0.0679212	-1.52251
Itga3	-0.737024	8.37748	-3.9282	0.00319084	0.0684236	-1.53299
Klra17	0.59818	5.41846	3.92215	0.00322111	0.0688284	-1.54215
Retnla	0.851402	10.5241	3.91833	0.00324039	0.0689153	-1.54793
Trim10	1.75848	4.78169	3.90708	0.00329783	0.0696773	-1.56497
Ubap2	-0.611905	8.71592	-3.89957	0.00333679	0.0699851	-1.57636
Tmem126a	0.574302	8.4254	3.89046	0.00338469	0.070414	-1.59019
Spink4	0.595628	5.45641	3.88008	0.00344019	0.0710358	-1.60596
Pacsin1	-0.664764	4.80815	-3.87353	0.00347564	0.0710358	-1.6159
Zfp162	-0.715391	5.91942	-3.87323	0.0034773	0.0710358	-1.61637
Hipk2	-0.590923	5.38165	-3.86691	0.00351189	0.071465	-1.62597
Pacs1	-0.754243	7.18618	-3.86652	0.00351409	0.071465	-1.62657
Foxo1	-0.593398	6.58394	-3.85895	0.00355603	0.0715948	-1.63808
Ndufb2	0.587169	6.714	3.85122	0.00359946	0.0722284	-1.64985
BC029169	-0.56791	6.56094	-3.84701	0.00362332	0.0724198	-1.65626
Hist1h2bj	0.639899	9.31733	3.84549	0.00363202	0.0724198	-1.65859
Cox7a2	0.575699	6.83936	3.84206	0.00365161	0.072437	-1.6638
Rfc4	0.654821	6.16644	3.84034	0.00366152	0.072437	-1.66643
Bat3	-0.560006	7.30752	-3.84014	0.00366266	0.072437	-1.66673
Gnpda2	0.626475	7.78273	3.83994	0.0036638	0.072437	-1.66704
Bag3	-0.601122	9.52731	-3.8122	0.00382727	0.0743303	-1.70937
Tenc1	-0.54319	5.31918	-3.79274	0.00394651	0.0755905	-1.73913
Sp5	-0.588986	7.07855	-3.78828	0.00397438	0.0756467	-1.74595
Cxcr6	0.622646	5.05726	3.78441	0.00399874	0.0758481	-1.75188
Itgb4	-0.592283	7.23855	-3.77949	0.00402994	0.0761445	-1.75942
Pde4dip	-0.679064	6.74912	-3.762	0.00414287	0.0770727	-1.78622
Sema3g	-0.558338	5.01454	-3.76065	0.00415174	0.0771585	-1.7883
Marco	-0.75801	7.22984	-3.75142	0.00421282	0.0778481	-1.80246
Hist1h2af	0.552658	8.29983	3.75115	0.00421462	0.0778481	-1.80288
Hist1h2bk	0.744346	7.99291	3.74986	0.00422327	0.077849	-1.80486
Villp	-0.713785	4.09581	-3.74884	0.00423004	0.0778947	-1.80642
E2f5	0.585358	6.98729	3.73954	0.00429283	0.0785494	-1.82071
Laptm5	-0.585637	12.1994	-3.73457	0.00432678	0.0788745	-1.82835
Fcer1a	0.759683	5.12017	3.73176	0.0043461	0.0789339	-1.83267
Snrpd1	0.553994	9.26051	3.73156	0.00434746	0.0789339	-1.83297
Spock2	-0.556397	5.9682	-3.72668	0.00438128	0.0794683	-1.84049
Rfx1	-0.557233	7.65261	-3.72466	0.00439531	0.0794818	-1.84359
Fcrl3	0.572432	9.55048	3.72371	0.00440195	0.0794818	-1.84505
Hrsp12	0.674308	7.03345	3.72279	0.00440834	0.0794818	-1.84646
1810029G24Rik	0.592267	8.3214	3.70549	0.0045311	0.0806867	-1.8731
Slc6a9	-0.612508	7.82342	-3.70177	0.00455801	0.0809717	-1.87884
Ncoa1	-0.666618	6.3282	-3.69867	0.0045805	0.0809743	-1.88361
1700020H15	0.57356	3.93233	3.6961	0.00459925	0.0811474	-1.88757
4930550C14Rik	0.560956	5.89263	3.68865	0.00465408	0.081717	-1.89907
Ece1	-0.601492	9.01066	-3.68257	0.00469933	0.0817981	-1.90845
4930438M06Rik	-0.637098	6.9722	-3.68149	0.00470738	0.081836	-1.91011
Olfr519	-0.580044	3.98761	-3.677	0.00474113	0.0820529	-1.91704
Fkbp11	0.580206	8.35	3.67406	0.00476342	0.082203	-1.92159
Camta2	-0.63524	8.91601	-3.67186	0.00478007	0.0824118	-1.92497
4833401D15Rik	0.548323	5.2057	3.66356	0.00484373	0.082726	-1.9378
Plekhm1	-0.564883	8.31693	-3.65775	0.00488879	0.0830223	-1.94678
Lamb2	-0.690122	7.6146	-3.65541	0.00490711	0.0830223	-1.9504
9130211I03Rik	0.569111	5.7285	3.64782	0.00496684	0.0833797	-1.96213
Bcl2a1d	0.745071	6.83716	3.64689	0.00497425	0.0833797	-1.96358
D11Ertd603e	0.552241	5.83028	3.64485	0.00499047	0.0834971	-1.96674
Cd59b	0.582571	7.09944	3.64299	0.00500531	0.083591	-1.96962
Olfr1076	0.5501	3.99501	3.61863	0.0052039	0.0854729	-2.00734
Wbp5	0.56419	10.653	3.61321	0.00524919	0.0858441	-2.01574
Rap1gap	-0.561429	4.7265	-3.60976	0.00527826	0.0859935	-2.0211
Anpep	-0.638887	6.73314	-3.6051	0.00531778	0.0862651	-2.02833
Hist1h2bf	0.591601	9.61657	3.59916	0.00536859	0.0867444	-2.03755
Git2	-0.546108	6.58739	-3.59734	0.00538424	0.0868255	-2.04037
Igf1r	-0.685265	5.0594	-3.58388	0.00550162	0.0876413	-2.06127
Cdh16	-0.677648	6.45912	-3.5825	0.00551385	0.0876413	-2.06343
Xpo6	-0.633212	6.74295	-3.57647	0.00556738	0.088337	-2.07279
Vac14	-0.549292	5.50878	-3.56719	0.00565094	0.088698	-2.08723
Fank1	0.848107	4.80899	3.56386	0.00568124	0.0889587	-2.09241
Sertad2	-0.574169	8.41146	-3.56219	0.00569642	0.088971	-2.095
EG243881	-0.764992	7.48689	-3.55846	0.00573064	0.0893251	-2.10081
Eif2s3y	0.551303	3.71892	3.54529	0.0058532	0.0901587	-2.12131
Mak3	0.576534	3.85102	3.5448	0.00585787	0.0901587	-2.12209
Celsr2	-0.670576	4.99563	-3.52106	0.00608594	0.0916685	-2.1591
Aoc3	-0.5575	6.6316	-3.51885	0.0061076	0.0919183	-2.16254
Hist1h2an	0.578035	7.80013	3.5072	0.00622334	0.092736	-2.18073
2900010J23Rik	0.676775	4.28584	3.50397	0.00625583	0.0929145	-2.18578
Mtap1b	-0.668811	4.92867	-3.49574	0.00633937	0.0936181	-2.19863
LOC100034251	0.660564	10.5459	3.45795	0.00673838	0.0963291	-2.25775
Cib2	0.578097	8.24758	3.45432	0.00677798	0.0965627	-2.26343
C330011K17Rik	0.581169	3.50037	3.44956	0.00683042	0.0969962	-2.27089
Olfr731	0.601048	3.8954	3.44698	0.00685905	0.0970984	-2.27494
Ear4	0.571131	10.2057	3.44501	0.00688087	0.0972424	-2.27802
Ear11	0.569267	5.09199	3.43217	0.00702547	0.0985054	-2.29815
Tmem141	0.58238	6.61228	3.42763	0.00707737	0.0988758	-2.30528
Cox7b	0.647892	5.79119	3.41733	0.00719645	0.0997702	-2.32144
Aasdhppt	-0.572471	3.96036	-3.41496	0.00722412	0.100052	-2.32515
Saa3	0.857197	11.143	3.40585	0.00733166	0.100766	-2.33945
Wdr37	0.640655	4.88772	3.36361	0.00785257	0.104469	-2.40588
Nuak1	-0.557145	5.44817	-3.36181	0.00787553	0.104469	-2.4087
G1p2	0.60444	6.94012	3.34932	0.00803732	0.105413	-2.42838
Epas1	-0.748166	7.74453	-3.34875	0.00804477	0.105413	-2.42927
Hist1h2bh	0.571728	8.96315	3.3452	0.00809144	0.105688	-2.43487
1810049K24Rik	-0.599501	5.3175	-3.34443	0.00810159	0.105688	-2.43608
Csf2rb2	-0.603682	5.2056	-3.34114	0.0081451	0.106103	-2.44126
Gm9	0.545612	4.02192	3.32204	0.0084027	0.107515	-2.47138
Flii	-0.548661	7.38286	-3.31338	0.00852224	0.108064	-2.48503
1700112C13Rik	0.62169	3.68727	3.29977	0.00871371	0.1097	-2.50652
Prei3	0.629432	6.48833	3.29948	0.00871787	0.1097	-2.50698
Bach2	-0.647365	6.3559	-3.29329	0.00880649	0.110203	-2.51675
Gse1	-0.596052	6.40719	-3.28664	0.00890258	0.110681	-2.52724
Gpr124	-0.596731	5.51027	-3.28601	0.00891186	0.110681	-2.52825
S100a8	0.718768	11.7517	3.28297	0.00895617	0.111079	-2.53305
Olfr94	0.581809	4.13987	3.28149	0.00897792	0.111171	-2.53539
1810037B05Rik	-0.726819	8.76676	-3.26211	0.00926698	0.112917	-2.56601
Fgd5	-0.591219	5.20036	-3.25406	0.00938991	0.113506	-2.57874
Srl	0.578315	3.67578	3.24398	0.00954633	0.11448	-2.5947
Uchl3	0.578399	6.97745	3.23513	0.00968576	0.115464	-2.60871
Irx3	-0.548425	10.3758	-3.23258	0.00972627	0.115696	-2.61274
Olfr957	0.613457	3.75334	3.22832	0.00979446	0.116062	-2.61949
Myh6	-0.971291	6.45561	-3.22597	0.00983233	0.116062	-2.62321
Fbp2	0.594124	4.77323	3.22101	0.0099125	0.116437	-2.63105
Cep63	-0.565922	5.17022	-3.20823	0.0101226	0.117742	-2.6513
Glycam1	0.895907	4.31706	3.20422	0.0101895	0.118203	-2.65766
4930417M19Rik	0.610025	3.66395	3.19188	0.0103981	0.119522	-2.67722
Slc2a5	-0.992658	3.37278	-3.15523	0.0110439	0.122608	-2.73535
Cd48	0.55642	4.97381	3.15339	0.0110775	0.122608	-2.73828
Aurkc	0.656471	3.82217	3.15329	0.0110793	0.122608	-2.73844
Lrrc7	0.625434	3.69934	3.14931	0.0111522	0.123143	-2.74476
Ptgfr	-0.567984	3.98727	-3.13701	0.0113804	0.124165	-2.76429
Slc4a1	1.32881	6.3977	3.12112	0.0116822	0.125404	-2.78952
Pitpnc1	-0.547851	6.15783	-3.11663	0.0117689	0.125706	-2.79665
Klre1	0.548279	5.72624	3.08487	0.0124022	0.12975	-2.84714
MGC41689	-0.604976	6.7969	-3.03298	0.0135129	0.137079	-2.92969
Angptl4	-0.682593	7.46649	-3.01842	0.0138427	0.138409	-2.95288
Card14	0.56419	3.761	3.01811	0.0138498	0.138409	-2.95337
2810453I06Rik	0.704035	6.13942	3.00972	0.0140434	0.139763	-2.96672
2200001I15Rik	0.560096	5.10664	3.00812	0.0140808	0.139958	-2.96927
6430548M08Rik	-0.554497	6.41016	-3.00083	0.014252	0.140506	-2.98089
Rapgef1	-0.570018	7.49591	-2.99141	0.0144761	0.141601	-2.99588
V1rc32	0.563959	3.71045	2.98981	0.0145145	0.14178	-2.99843
Gaa	-0.545138	8.44481	-2.98848	0.0145467	0.142018	-3.00056
Nkg7	0.559681	7.62234	2.98514	0.0146275	0.14208	-3.00588
Lrp1	-0.581656	6.35899	-2.98142	0.0147178	0.142309	-3.0118
Slc39a8	-0.678987	7.26189	-2.97695	0.0148274	0.142987	-3.01892
Disp1	-0.668848	5.43541	-2.9448	0.0156398	0.147293	-3.07013
Olfr57	-0.720686	3.60862	-2.93723	0.0158376	0.148003	-3.08219
Fzd2	-0.659093	4.8426	-2.93108	0.0160002	0.148679	-3.09199
Cdk5rap1	0.645466	6.815	2.92357	0.0162011	0.149804	-3.10396
Gypa	1.29033	4.81509	2.92217	0.016239	0.149822	-3.1062
Gulo	-0.572471	4.10468	-2.90493	0.0167108	0.151855	-3.13366
2810008M24Rik	0.543169	8.05394	2.88759	0.0171998	0.1545	-3.1613
Il1b	0.563775	8.27625	2.85549	0.0181437	0.157921	-3.21246
1810063P04Rik	0.57009	4.38478	2.84949	0.0183258	0.158882	-3.22202
Cyp2e1	-1.3765	6.89037	-2.81634	0.0193662	0.162763	-3.27483
Spatc1	-0.625915	3.28192	-2.81351	0.0194576	0.163301	-3.27932
Tcof1	-0.554514	6.01558	-2.80677	0.0196773	0.163933	-3.29006
Alas2	0.924692	8.13793	2.79616	0.0200285	0.165817	-3.30696
BC030314	-1.04309	3.45733	-2.79007	0.020233	0.166647	-3.31666
BC026374	-0.56419	3.82521	-2.78662	0.0203496	0.167216	-3.32214
Clecsf9	0.625939	6.07522	2.77057	0.0209017	0.168393	-3.3477
BC048562	-0.588512	4.06066	-2.75838	0.0213311	0.170273	-3.3671
Acsm3	-0.578989	4.17675	-2.74265	0.0218986	0.172523	-3.39213
Nfe2l2	-0.631362	6.5941	-2.72154	0.0226838	0.175654	-3.4257
U46068	-1.04536	8.76748	-2.69203	0.0238295	0.178571	-3.47261
Fmn	0.62169	3.63661	2.68202	0.0242311	0.17986	-3.4885
Cyp8b1	-0.645346	4.99168	-2.67565	0.0244904	0.180981	-3.49862
Ly6d	0.5729	7.79279	2.6743	0.0245458	0.181316	-3.50077
Edg4	-0.585534	3.84669	-2.65174	0.0254883	0.185036	-3.53657
Ear6	0.882647	7.5494	2.64621	0.025725	0.186231	-3.54535
Gpr73	-0.654491	4.18702	-2.64077	0.0259601	0.187474	-3.55398
B230373P09Rik	-0.622137	6.45688	-2.60358	0.0276245	0.194014	-3.61292
Olfr1056	0.653119	3.3832	2.58071	0.0287004	0.198115	-3.64911
Actr6	0.557266	4.52523	2.57251	0.0290963	0.199782	-3.66208
Gabra6	0.590818	3.6362	2.56665	0.0293828	0.20076	-3.67134
Polr2c	0.631028	3.34643	2.55501	0.0299599	0.202867	-3.68974
Hamp	-1.45089	5.54619	-2.53803	0.0308222	0.205708	-3.71655
Cxcl9	0.667885	7.21383	2.52112	0.0317053	0.208746	-3.74322
Eraf	0.674045	9.26007	2.46942	0.0345648	0.217609	-3.8246
Slc4a10	-0.723308	3.75163	-2.44721	0.0358707	0.222443	-3.85948
Camp	1.03711	5.43514	2.44674	0.0358991	0.222466	-3.86022
1700054O13Rik	0.754459	3.19704	2.42608	0.0371586	0.226172	-3.89261
Myl1	0.720177	6.70501	2.42454	0.0372539	0.226434	-3.89501
Vtn	-0.561742	6.29937	-2.40272	0.0386353	0.23006	-3.92917
Mbd2	-0.723308	2.88998	-2.35877	0.041572	0.238457	-3.99774
Prdx6-rs1	0.594486	4.17853	2.33259	0.0434248	0.243308	-4.03846
Plunc	-0.547756	8.58266	-2.28709	0.0468399	0.252826	-4.10899
Cps1	-1.11597	4.18093	-2.27516	0.0477778	0.255003	-4.12742
Olfr659	0.568328	4.27276	2.26447	0.0486337	0.257299	-4.14392
